# Supplementary material for: The pan-cancer pathological regulatory landscape
Source: PubMed Central journal article supplement (PMC5175166; doi:10.1038/srep39709), 2016-12-21

# **The pan-cancer pathological regulatory landscape**

Matias M. Falco, Marta Bleda, José Carbonell-Caballero, Joaquín Dopazo

## **Supplementary Material**

## Supplementary Table 2.

List of p-values of the Kaplan-Meier test that relates TF with survival, along with hazard ratios and the number of patients with high and low TF activity.

| Cancer | Transcription Factor | Kaplan-Meier p-value | Hazard ratio (confidence interval) | Patients high TF activity | Patients low TF activity |
|--------|----------------------|----------------------|------------------------------------|---------------------------|--------------------------|
| BLCA   | EBF1                 | 0.0421115            | 0.475 (0.228-0.99)                 | 61                        | 233                      |
| BLCA   | MEF2C                | 0.0373213            | 6.508 (0.853-49.628)               | 9                         | 285                      |
| BLCA   | PAX5                 | 0.0201307            | 0.277 (0.087-0.883)                | 35                        | 259                      |
| BLCA   | SRF                  | 0.0074854            | 4.375 (1.34-14.281)                | 13                        | 281                      |
| BRCA   | EBF1                 | 0.000572921          | 0.467 (0.299-0.728)                | 443                       | 592                      |
| BRCA   | FOSL1                | 0.0357151            | 0.582 (0.349-0.971)                | 270                       | 765                      |
| BRCA   | GATA2                | 0.0268621            | 0.639 (0.428-0.953)                | 540                       | 495                      |
| BRCA   | TAL1_GATA1           | 0.0168877            | 0.578 (0.367-0.911)                | 383                       | 652                      |
| BRCA   | ZBTB33               | 0.0254967            | 1.619 (1.056-2.481)                | 533                       | 502                      |
| COAD   | MYC                  | 0.0149399            | 0.491 (0.275-0.88)                 | 193                       | 233                      |
| COAD   | E2F6                 | 0.00313592           | 0.415 (0.228-0.756)                | 196                       | 230                      |
| COAD   | EBF1                 | 0.035267             | 0.154 (0.021-1.129)                | 24                        | 402                      |
| COAD   | FOXA1                | 0.0498402            | 0.467 (0.215-1.016)                | 65                        | 361                      |
| COAD   | FOXA2                | 0.0211085            | 0.216 (0.052-0.9)                  | 42                        | 384                      |
| COAD   | HNF4G                | 0.0214298            | 0.351 (0.138-0.891)                | 61                        | 365                      |
| COAD   | MAX                  | 0.0463207            | 0.547 (0.3-0.997)                  | 149                       | 277                      |
| HNSC   | FOS                  | 0.0408123            | 1.434 (1.013-2.031)                | 126                       | 352                      |
| HNSC   | JUN                  | 0.00226654           | 1.636 (1.189-2.252)                | 232                       | 246                      |
| HNSC   | MYC                  | 0.00494556           | 1.575 (1.144-2.167)                | 250                       | 228                      |
| HNSC   | CTCF                 | 0.00401685           | 1.626 (1.164-2.273)                | 268                       | 210                      |
| HNSC   | CTCFL                | 0.0168626            | 1.513 (1.075-2.129)                | 293                       | 185                      |
| HNSC   | ELF1                 | 1.95045e-05          | 1.987 (1.442-2.74)                 | 233                       | 245                      |
| HNSC   | ETS1                 | 0.0146949            | 1.479 (1.078-2.031)                | 160                       | 318                      |
| HNSC   | FOSL1                | 0.0364771            | 1.41 (1.02-1.949)                  | 155                       | 323                      |
| HNSC   | FOSL2                | 0.0261911            | 1.435 (1.042-1.977)                | 162                       | 316                      |
| HNSC   | JUN_FOS              | 0.0132304            | 1.482 (1.084-2.027)                | 220                       | 258                      |
| HNSC   | JUND                 | 3.41571e-05          | 1.946 (1.412-2.682)                | 227                       | 251                      |
| HNSC   | NRF1                 | 0.00226138           | 1.624 (1.186-2.223)                | 208                       | 270                      |
| HNSC   | RXR_RAR_DR5          | 0.020795             | 1.448 (1.056-1.986)                | 183                       | 295                      |
| HNSC   | SP1                  | 0.0168308            | 1.464 (1.069-2.005)                | 203                       | 275                      |
| HNSC   | SP2                  | 0.0281694            | 1.418 (1.037-1.941)                | 196                       | 282                      |
| HNSC   | NR2C2                | 0.00135607           | 1.741 (1.235-2.455)                | 117                       | 361                      |
| HNSC   | YY1                  | 0.0109523            | 1.522 (1.099-2.108)                | 122                       | 356                      |
| KIRC   | FOS                  | 0.00545171           | 0.645 (0.472-0.881)                | 305                       | 212                      |
| KIRC   | JUN                  | 5.34566e-09          | 0.382 (0.273-0.534)                | 263                       | 254                      |
| KIRC   | MYC                  | 0.00405561           | 0.57 (0.386-0.84)                  | 442                       | 75                       |
| KIRC   | CTCF                 | 0.000280997          | 0.563 (0.411-0.771)                | 357                       | 160                      |
| KIRC   | CTCFL                | 0.00925749           | 0.638 (0.453-0.897)                | 400                       | 117                      |
| KIRC   | E2F4                 | 0.0253689            | 0.638 (0.428-0.949)                | 125                       | 392                      |

|      |             |             |                        |     |     |
|------|-------------|-------------|------------------------|-----|-----|
| KIRC | E2F6        | 0.00626335  | 0.616 (0.434-0.875)    | 190 | 327 |
| KIRC | EGR1        | 2.10067e-05 | 0.444 (0.302-0.652)    | 178 | 339 |
| KIRC | ELF1        | 0.00159433  | 0.584 (0.417-0.819)    | 205 | 312 |
| KIRC | ETS1        | 0.000242133 | 0.561 (0.41-0.767)     | 330 | 187 |
| KIRC | FOSL1       | 0.000396099 | 0.54 (0.382-0.764)     | 416 | 101 |
| KIRC | FOXA2       | 0.0215194   | 1.61 (1.069-2.424)     | 71  | 446 |
| KIRC | HNF4G       | 0.000911417 | 0.594 (0.435-0.811)    | 332 | 185 |
| KIRC | IRF4        | 0.000802979 | 0.559 (0.396-0.789)    | 404 | 113 |
| KIRC | JUN_FOS     | 1.13106e-06 | 0.467 (0.342-0.64)     | 311 | 206 |
| KIRC | JUNB        | 0.00204717  | 0.601 (0.433-0.834)    | 394 | 123 |
| KIRC | JUND        | 0.0005622   | 0.58 (0.424-0.794)     | 296 | 221 |
| KIRC | MAX         | 0.000286817 | 0.562 (0.41-0.771)     | 357 | 160 |
| KIRC | MEF2A       | 2.17395e-08 | 0.379 (0.266-0.54)     | 239 | 278 |
| KIRC | MEF2C       | 1.84387e-05 | 0.341 (0.203-0.571)    | 125 | 392 |
| KIRC | MYC_MAX     | 0.0410002   | 0.724 (0.53-0.988)     | 290 | 227 |
| KIRC | NRF1        | 1.92972e-06 | 0.4 (0.271-0.591)      | 174 | 343 |
| KIRC | REST        | 0.0488188   | 0.668 (0.446-1.001)    | 442 | 75  |
| KIRC | PAX5        | 0.00315687  | 0.626 (0.458-0.857)    | 277 | 240 |
| KIRC | PBX3        | 0.00198271  | 0.59 (0.421-0.827)     | 390 | 127 |
| KIRC | SPI1        | 2.09049e-06 | 0.46 (0.331-0.639)     | 403 | 114 |
| KIRC | RXR_RAR_DR5 | 0.00711851  | 0.643 (0.465-0.889)    | 242 | 275 |
| KIRC | RXRA_VDR    | 0.00158299  | 0.609 (0.446-0.831)    | 309 | 208 |
| KIRC | SP1         | 0.0121442   | 0.531 (0.321-0.878)    | 81  | 436 |
| KIRC | SP2         | 0.00902423  | 0.575 (0.377-0.876)    | 117 | 400 |
| KIRC | SRF         | 6.57821e-08 | 0.289 (0.178-0.466)    | 153 | 364 |
| KIRC | TCF12       | 0.0190257   | 0.69 (0.505-0.942)     | 277 | 240 |
| KIRC | NR2C2       | 0.00215925  | 0.609 (0.442-0.839)    | 241 | 276 |
| KIRC | USF1        | 8.99021e-06 | 0.44 (0.303-0.639)     | 199 | 318 |
| KIRC | YY1         | 3.34266e-05 | 0.265 (0.135-0.52)     | 83  | 434 |
| KIRC | ZBTB33      | 0.0084004   | 0.113 (0.016-0.805)    | 24  | 493 |
| KIRC | ZEB1        | 5.97385e-05 | 2.142 (1.463-3.134)    | 68  | 449 |
| KIRC | ZNF263      | 0.00801888  | 0.601 (0.411-0.879)    | 434 | 83  |
| KIRP | RXRA        | 0.0372079   | 2.343 (1.027-5.346)    | 56  | 166 |
| LIHC | EGR1        | 0.0129996   | 0.506 (0.293-0.875)    | 103 | 191 |
| LUAD | JUND        | 0.00948775  | 1.635 (1.123-2.378)    | 232 | 241 |
| LUAD | MEF2C       | 0.000982058 | 13.464 (1.777-102.048) | 3   | 470 |
| LUAD | TAL1_GATA1  | 0.0206886   | 1.537 (1.065-2.22)     | 225 | 248 |
| LUAD | TCF12       | 0.037926    | 1.723 (1.025-2.897)    | 59  | 414 |
| LUSC | FOS         | 0.0155074   | 0.61 (0.408-0.914)     | 130 | 296 |
| LUSC | ELF1        | 0.0227034   | 3.518 (1.107-11.175)   | 6   | 420 |
| LUSC | NRF1        | 0.0448748   | 3.057 (0.967-9.665)    | 6   | 420 |
| LUSC | REST        | 0.0149819   | 0.651 (0.459-0.922)    | 278 | 148 |
| THCA | EBF1        | 0.0420116   | 0.239 (0.053-1.07)     | 223 | 272 |
| THCA | ECR_USP     | 0.0100013   | 0.216 (0.06-0.779)     | 458 | 37  |
| THCA | HNF4A       | 0.0499348   | 0.357 (0.122-1.044)    | 361 | 134 |
| THCA | PAX5        | 0.0399298   | 0.156 (0.02-1.196)     | 180 | 315 |
| THCA | RXRA        | 0.0239565   | 0.247 (0.067-0.918)    | 447 | 48  |
| THCA | RXRA_VDR    | 0.00828255  | 0.266 (0.093-0.763)    | 376 | 119 |
| UCEC | E2F4        | 0.00221894  | 0.401 (0.218-0.734)    | 323 | 184 |
| UCEC | E2F6        | 0.035514    | 0.487 (0.245-0.966)    | 211 | 296 |
| UCEC | ELF1        | 0.0113017   | 0.319 (0.126-0.811)    | 153 | 354 |
| UCEC | GATA2       | 0.017712    | 0.469 (0.248-0.89)     | 240 | 267 |
| UCEC | HNF4G       | 0.041277    | 0.529 (0.285-0.985)    | 264 | 243 |

|      |            |           |                     |     |     |
|------|------------|-----------|---------------------|-----|-----|
| UCEC | NR1H3_RXRA | 0.0386898 | 0.526 (0.283-0.977) | 247 | 260 |
| UCEC | PAX5       | 0.0111818 | 0.366 (0.163-0.822) | 176 | 331 |

### **Supplementary Figure 1.**

Change of TF activity in the different cancers studied. Cells in red indicate increased activity of the TF in the cancer with respect to the corresponding normal tissue, according to the TFTEA, cells in blue indicate a decreased activity and cells in grey indicate that no significant change in activity was detected. In addition, cells contain the discretized (Not detected / low / medium / high) protein expression value, according to the Human Proteome Atlas <sup>57</sup> of the TF in the healthy tissue in which the cancer originated, when available, otherwise a “0” appears. Columns correspond to cancers and rows to TFs.

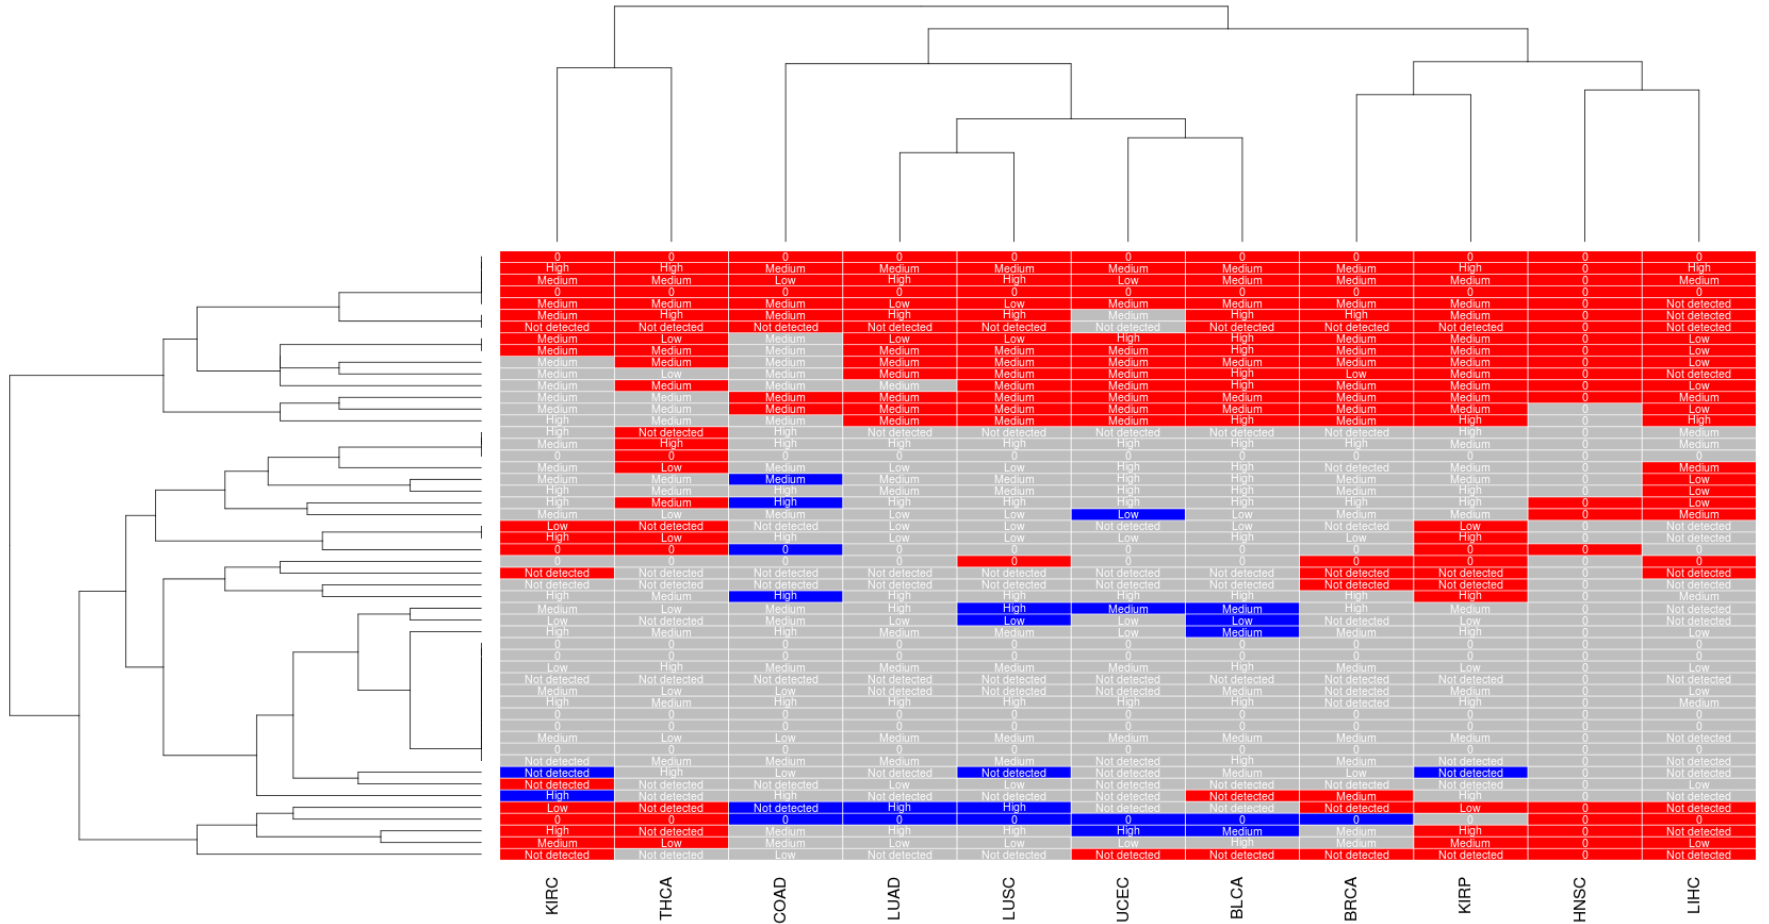

**Supplementary Figure 2.**

K-M detailed plots representing TF activities significantly associated to patient survival in all the cancers analysed from Figure 3.

# CTCF in HNSC

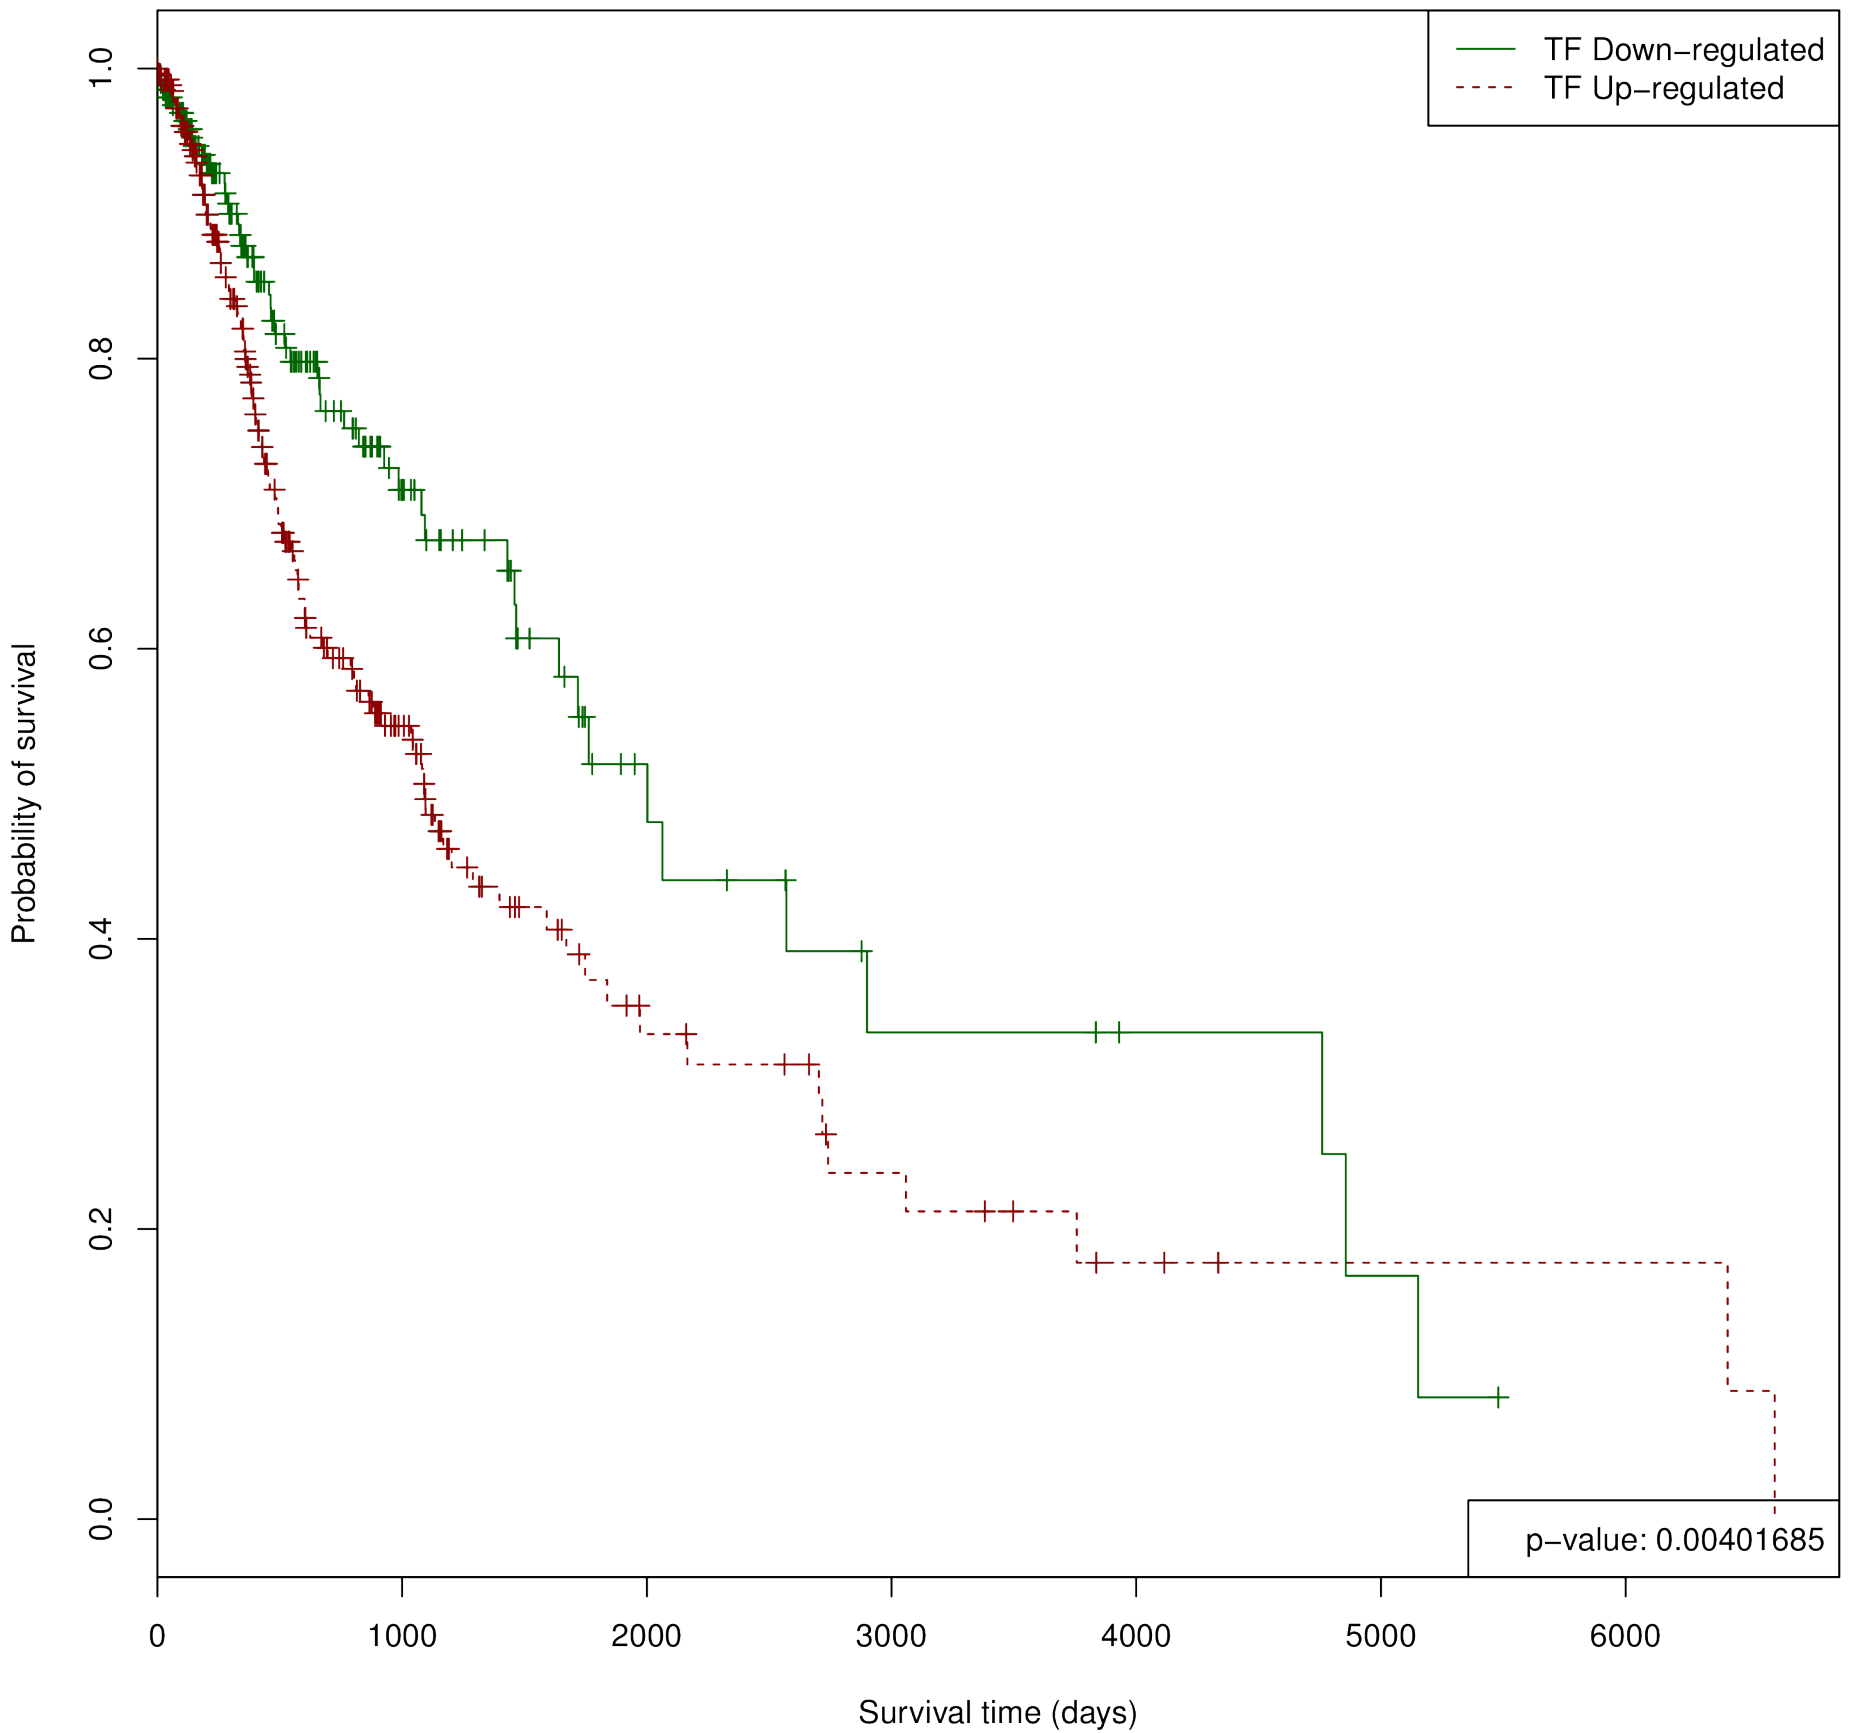



# CTCF in KIRC

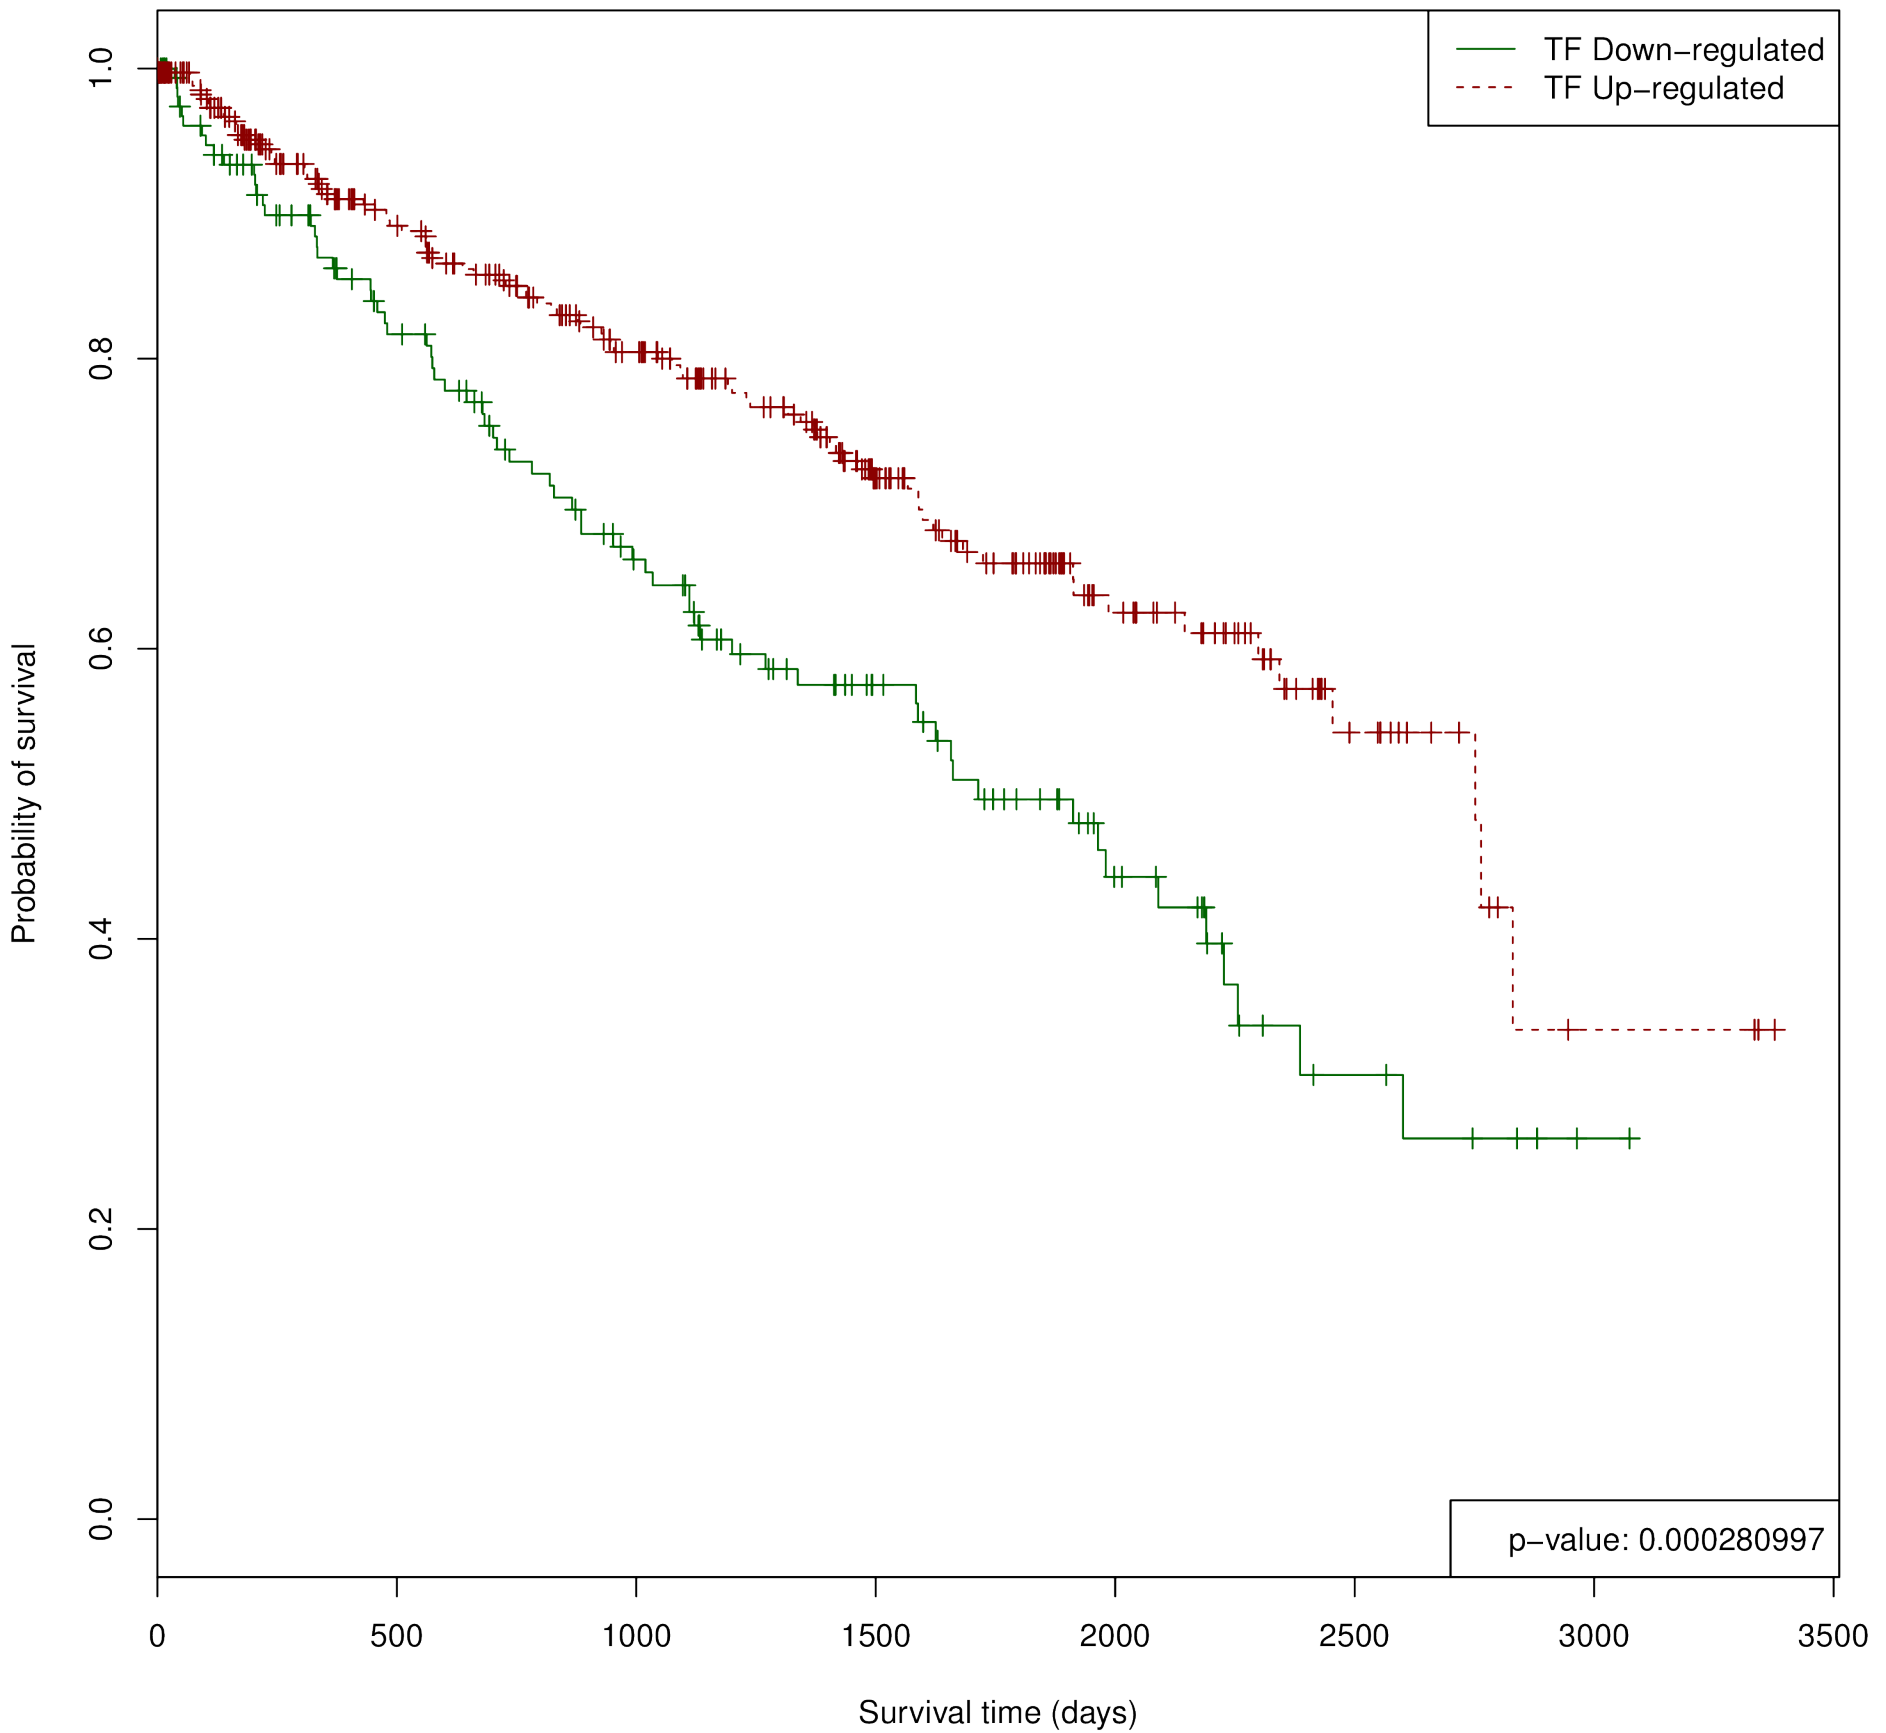

# CTCFL in HNSC

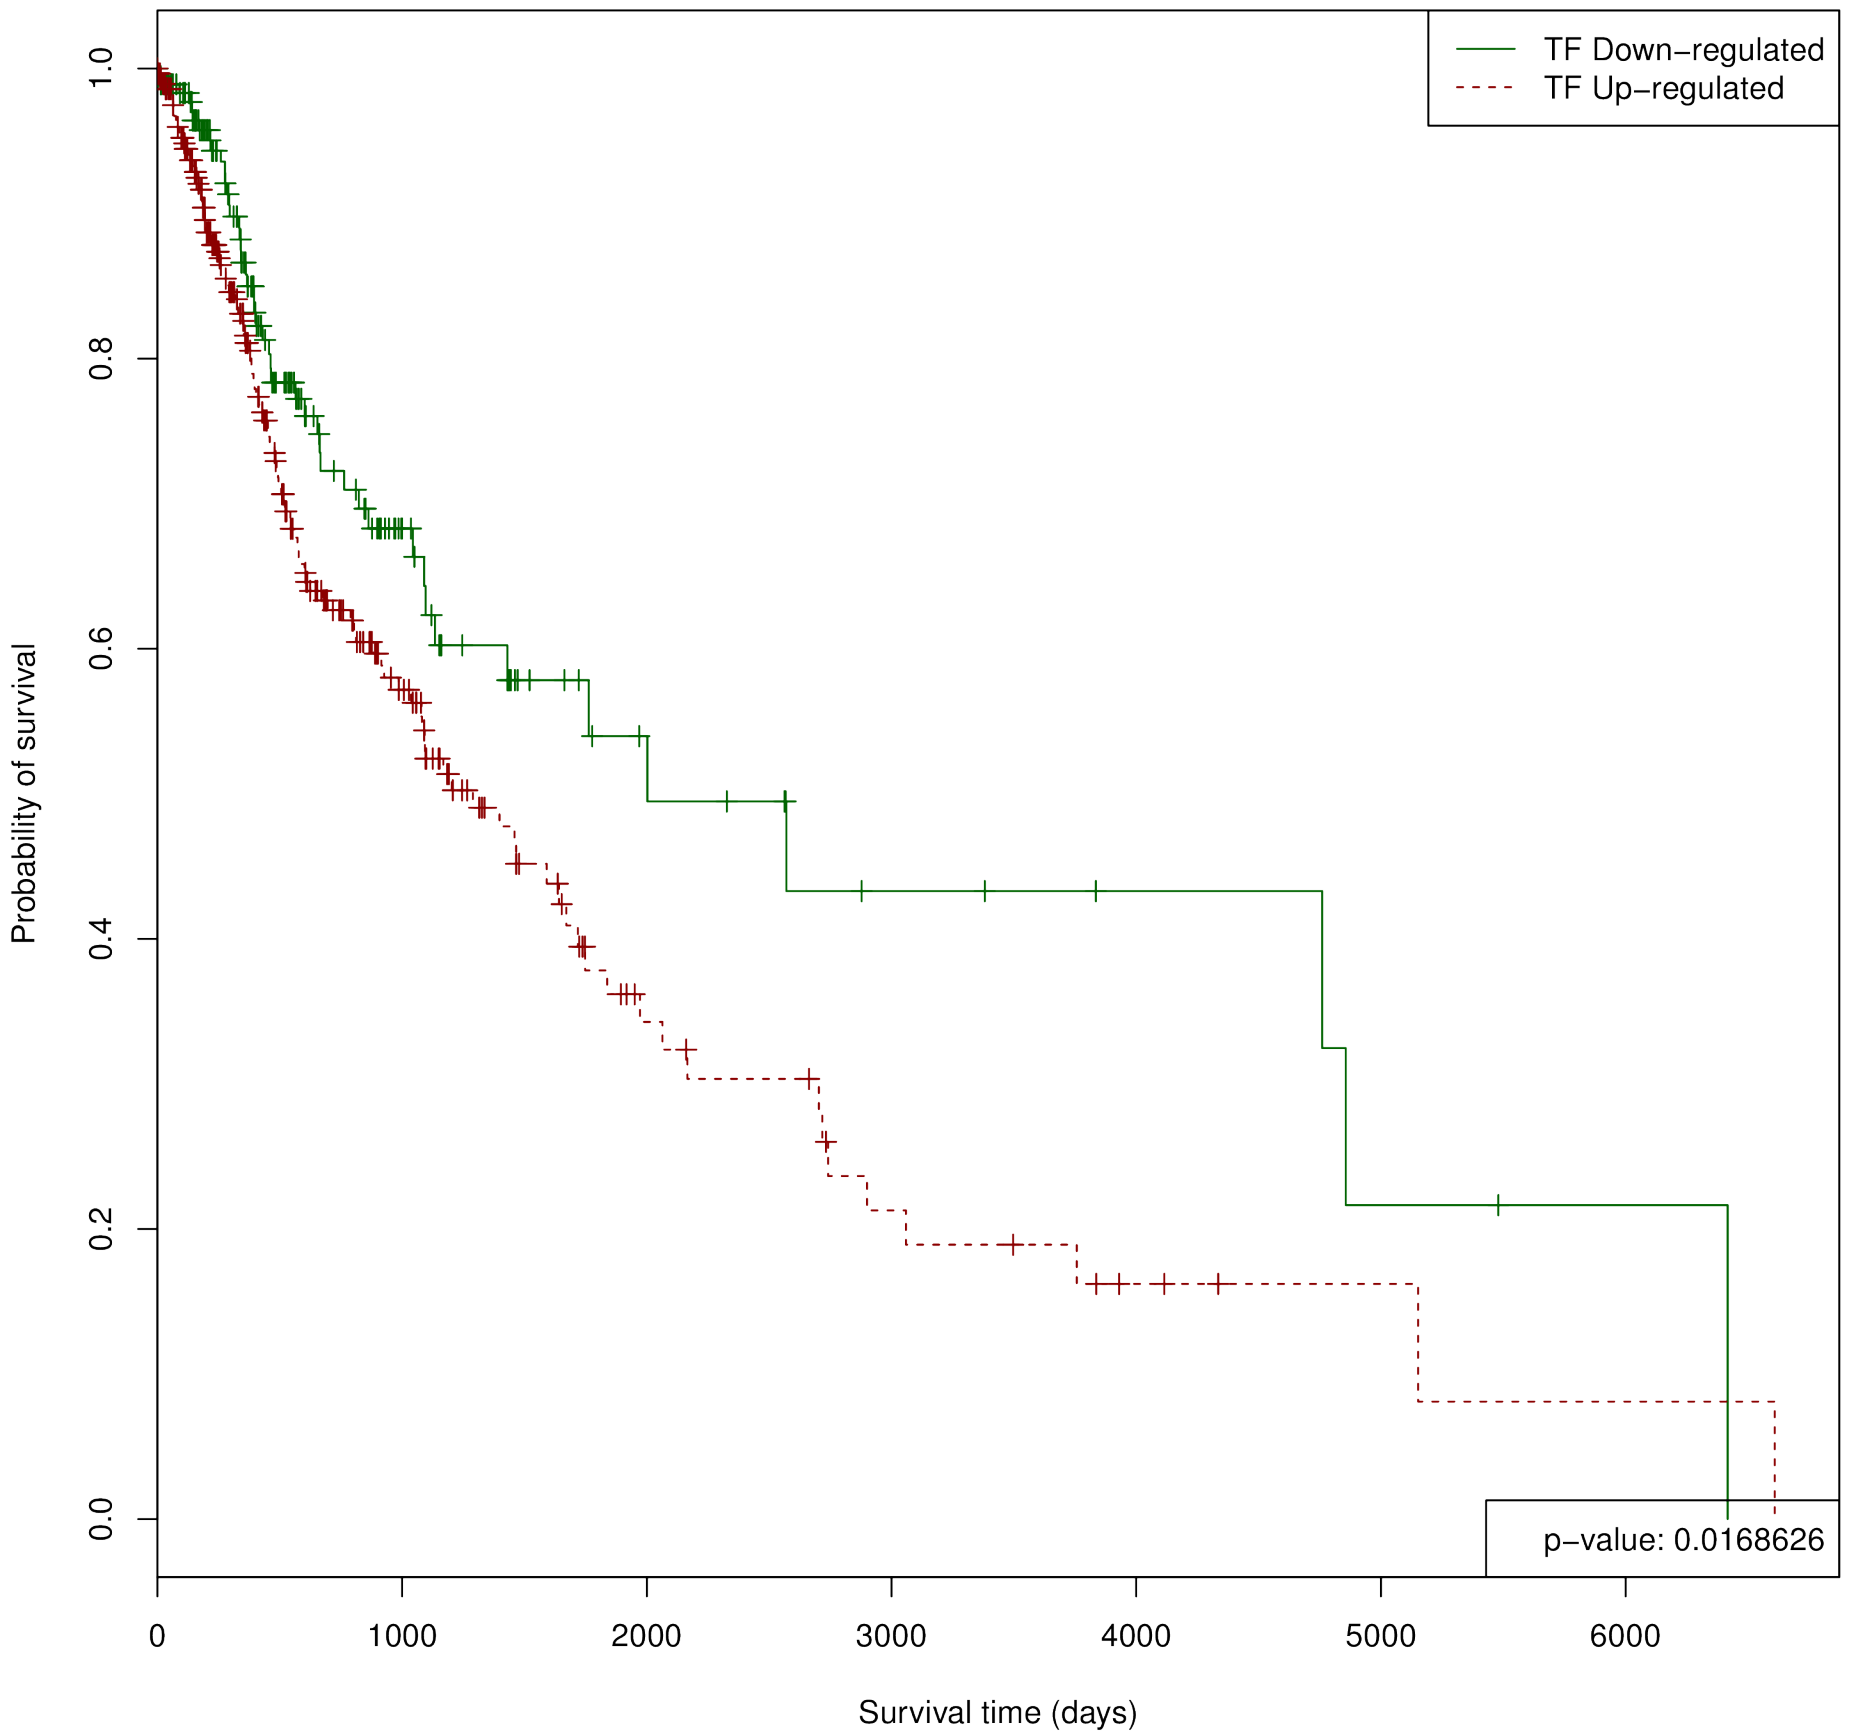

# CTCFL in KIRC

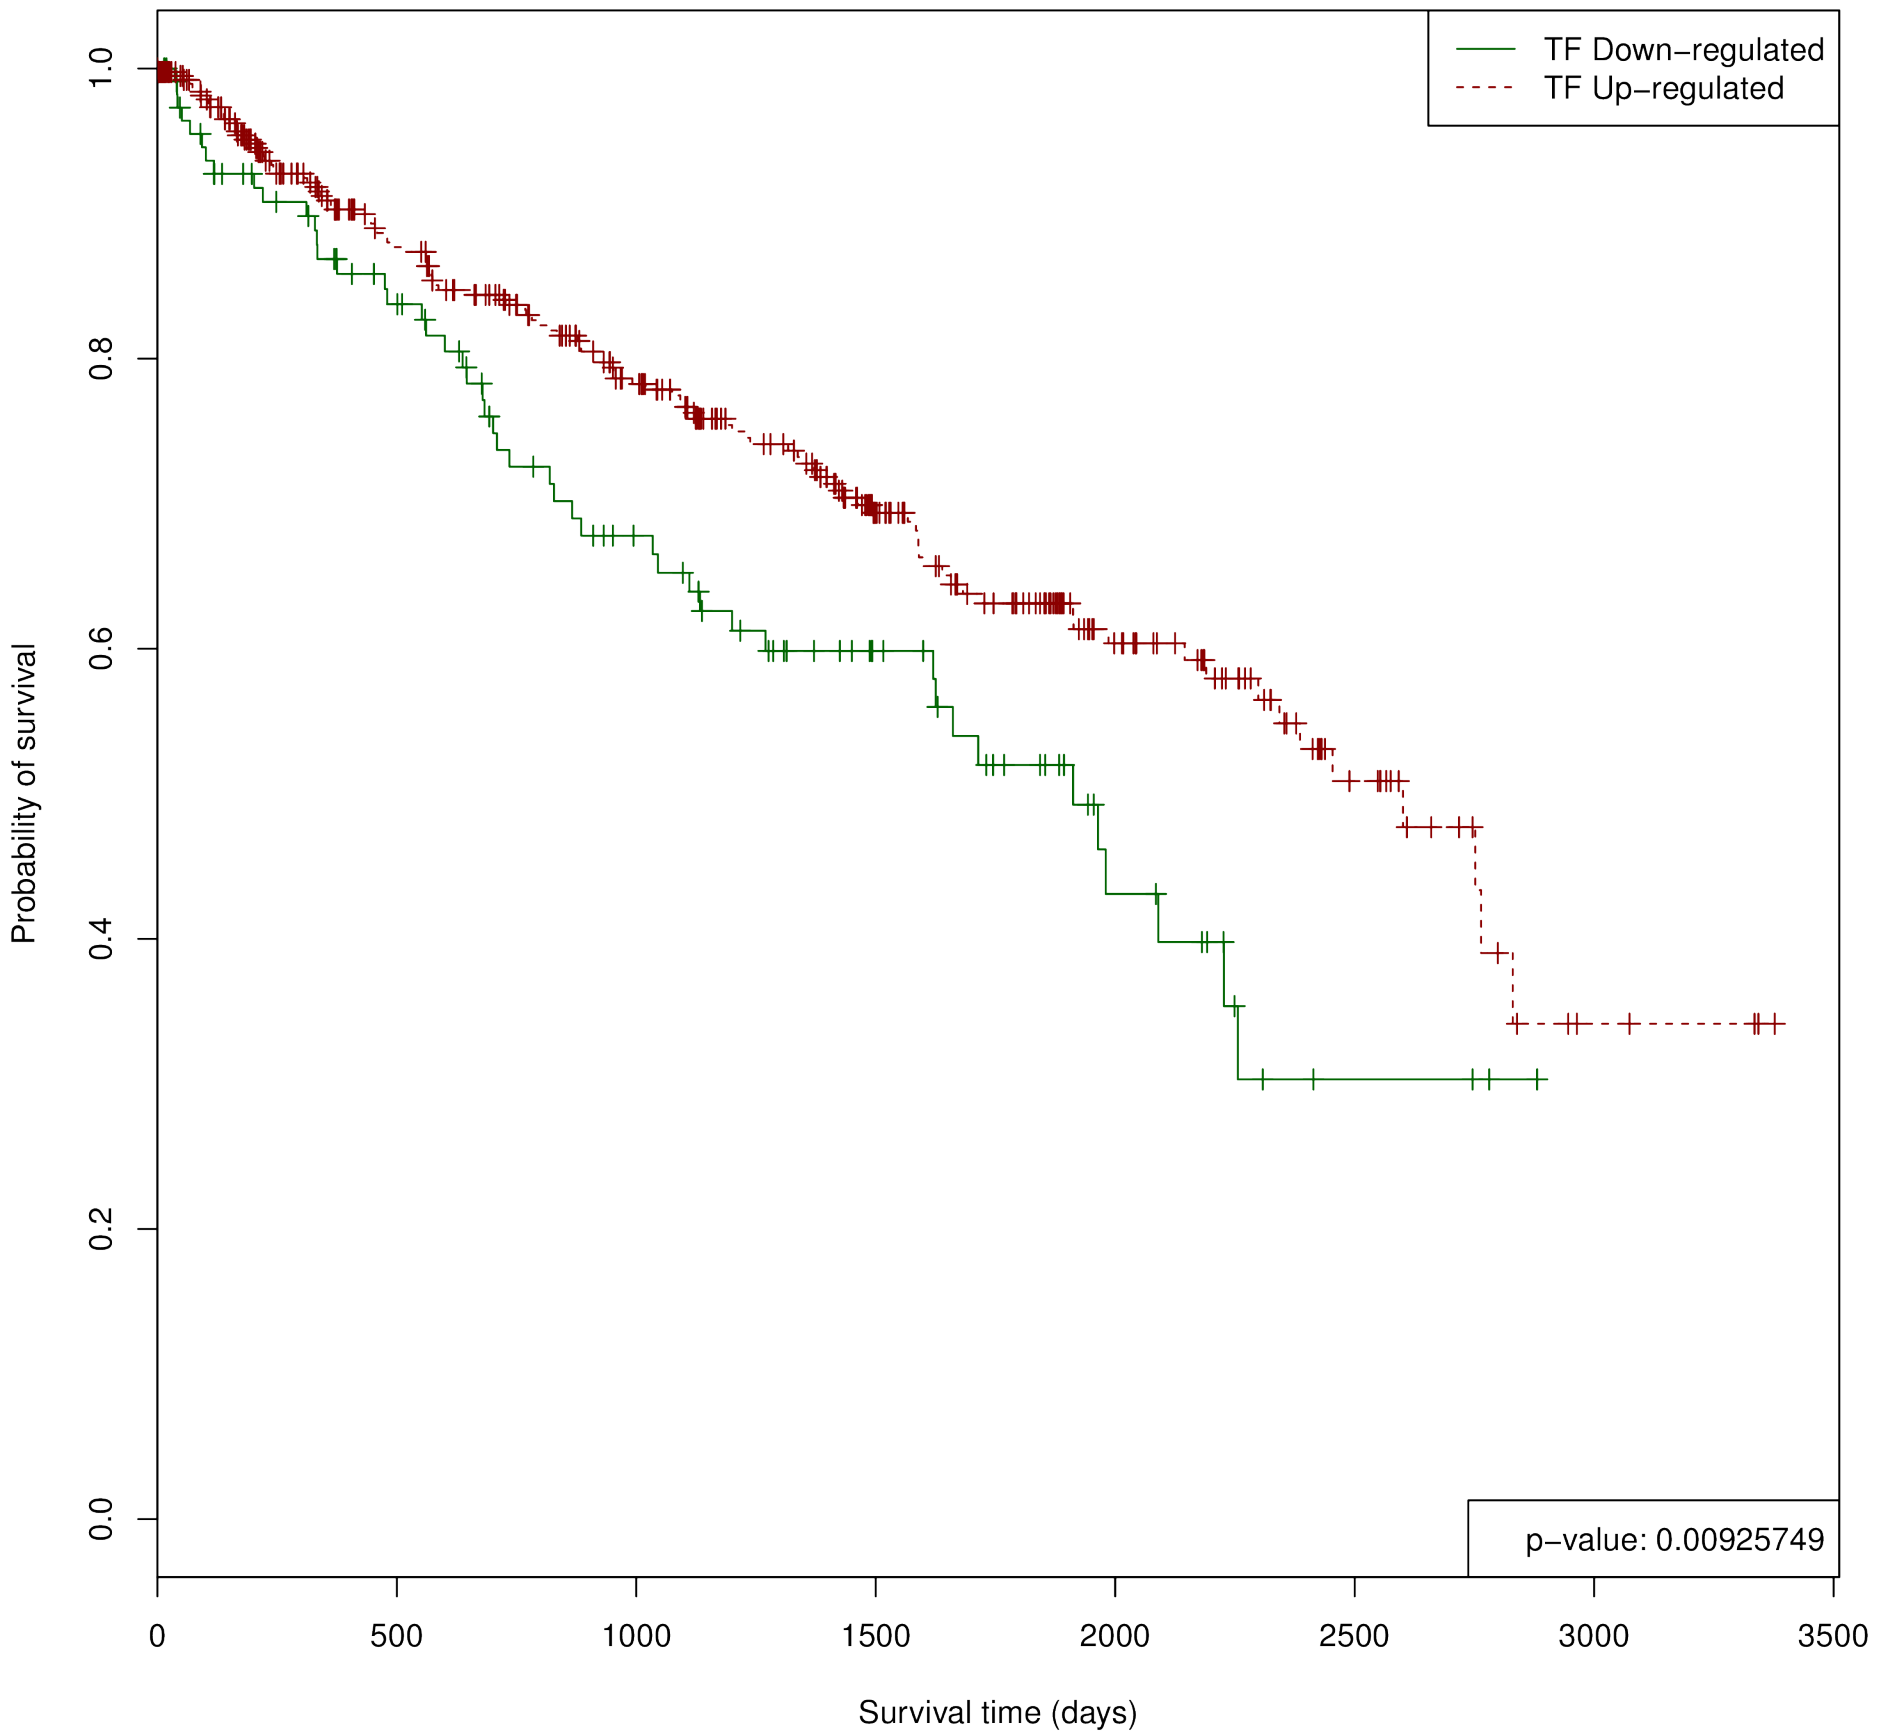

# E2F4 in KIRC

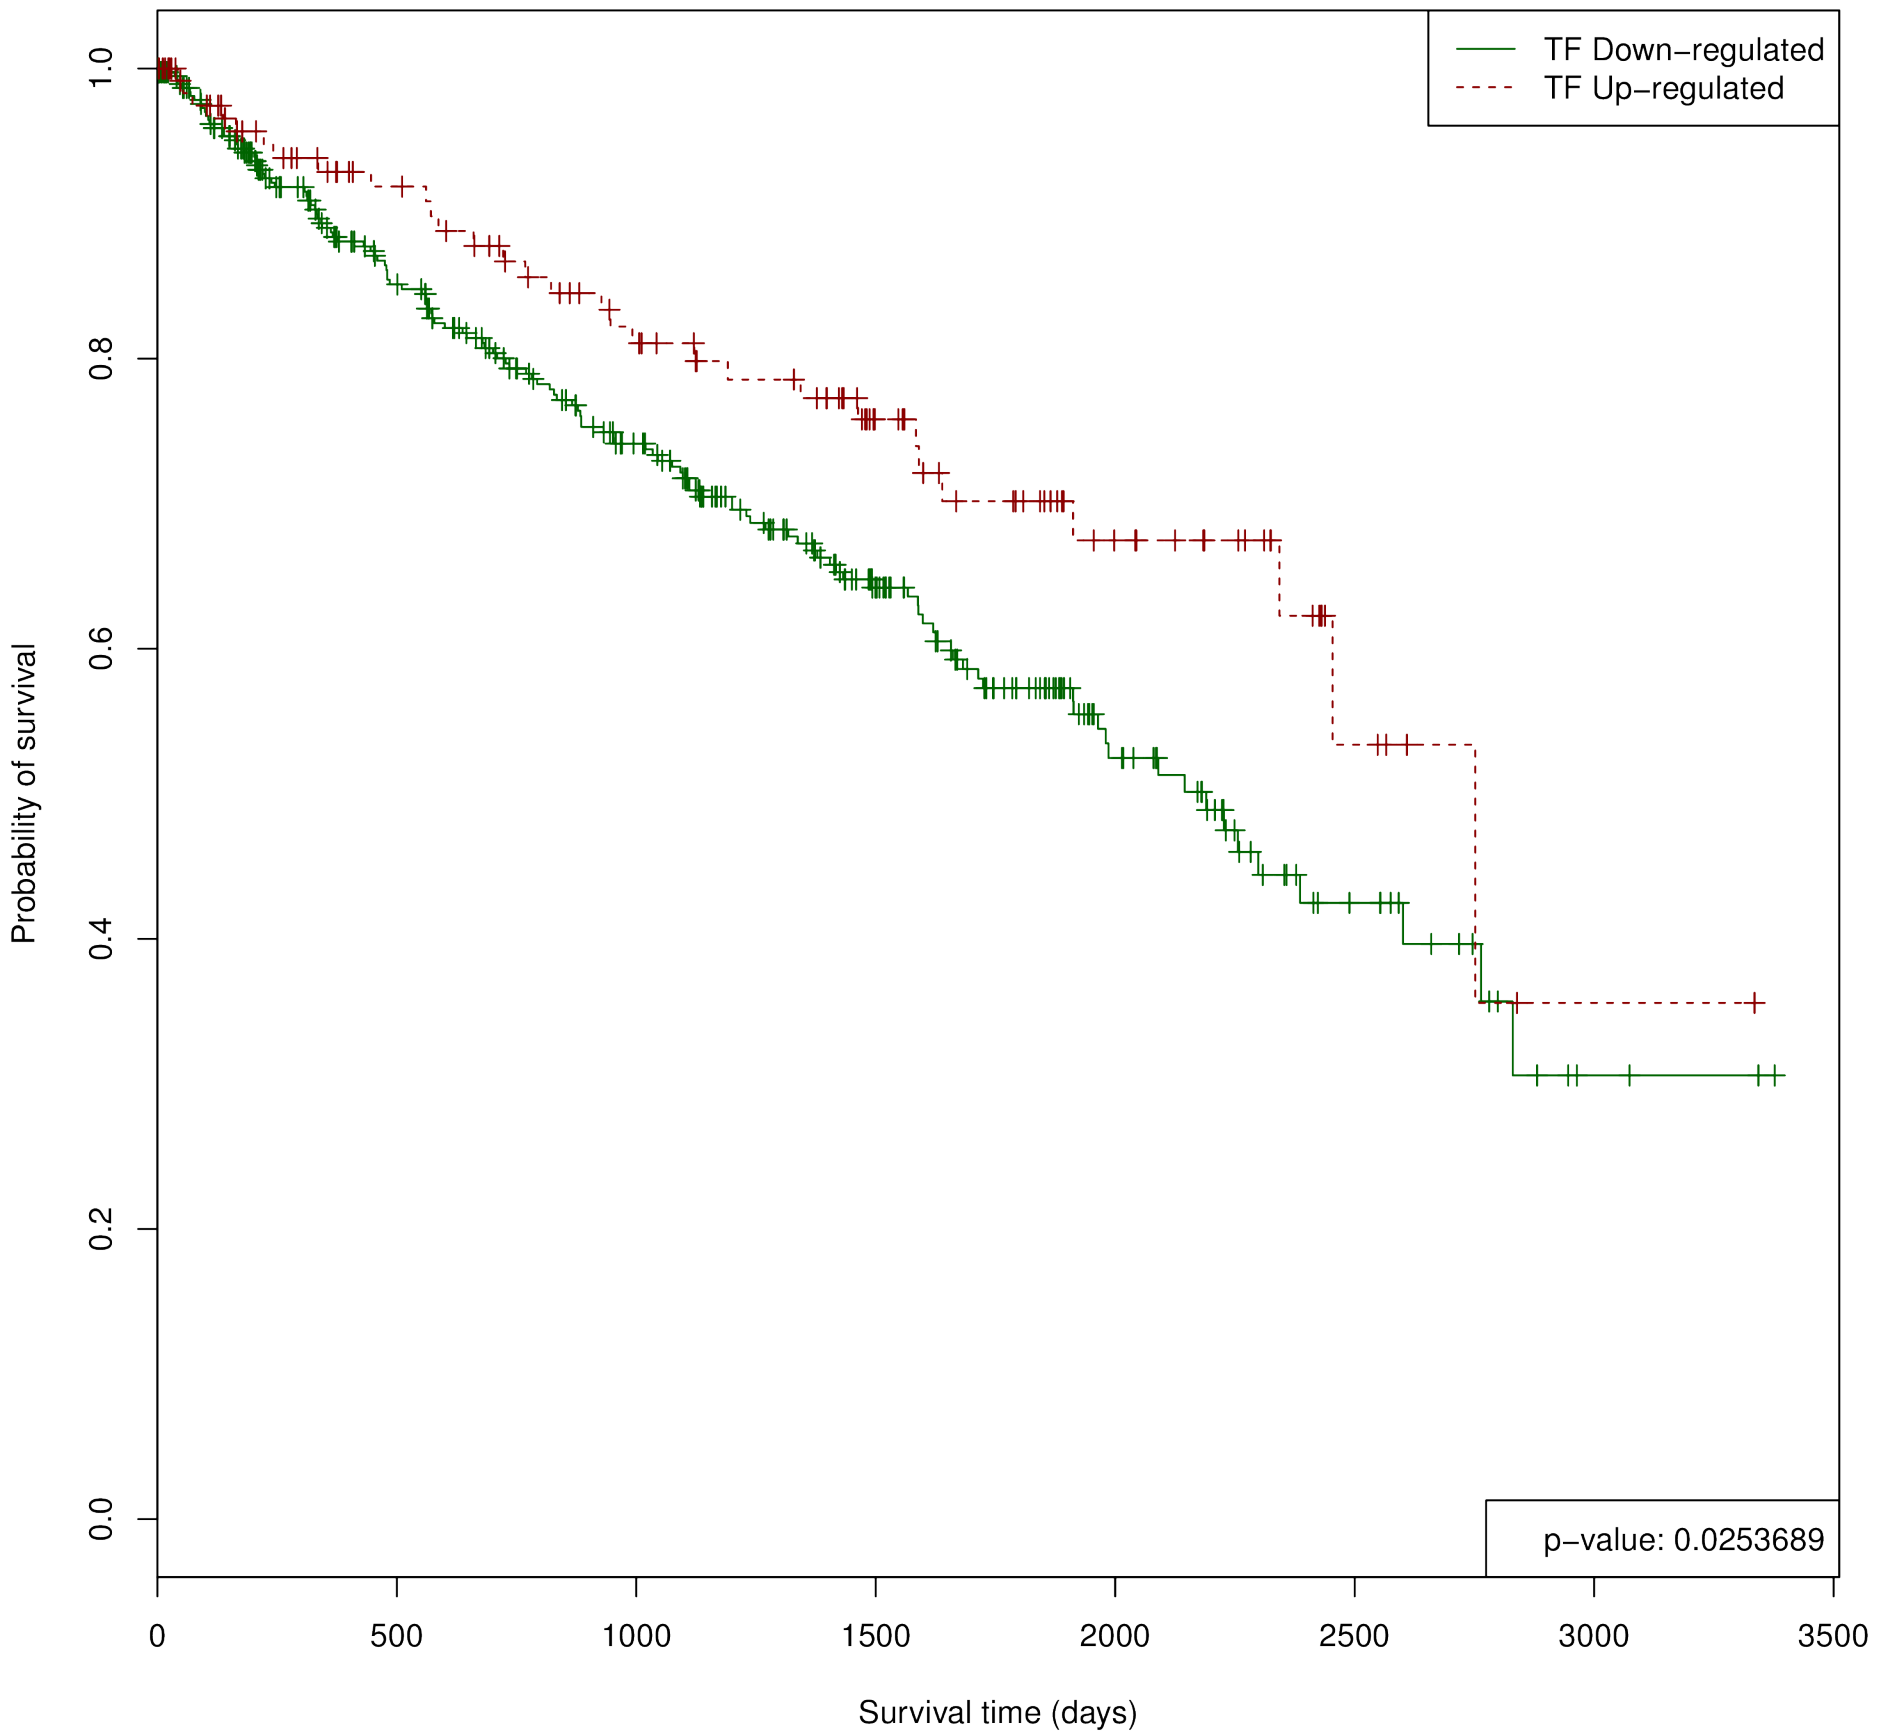

# E2F4 in UCEC

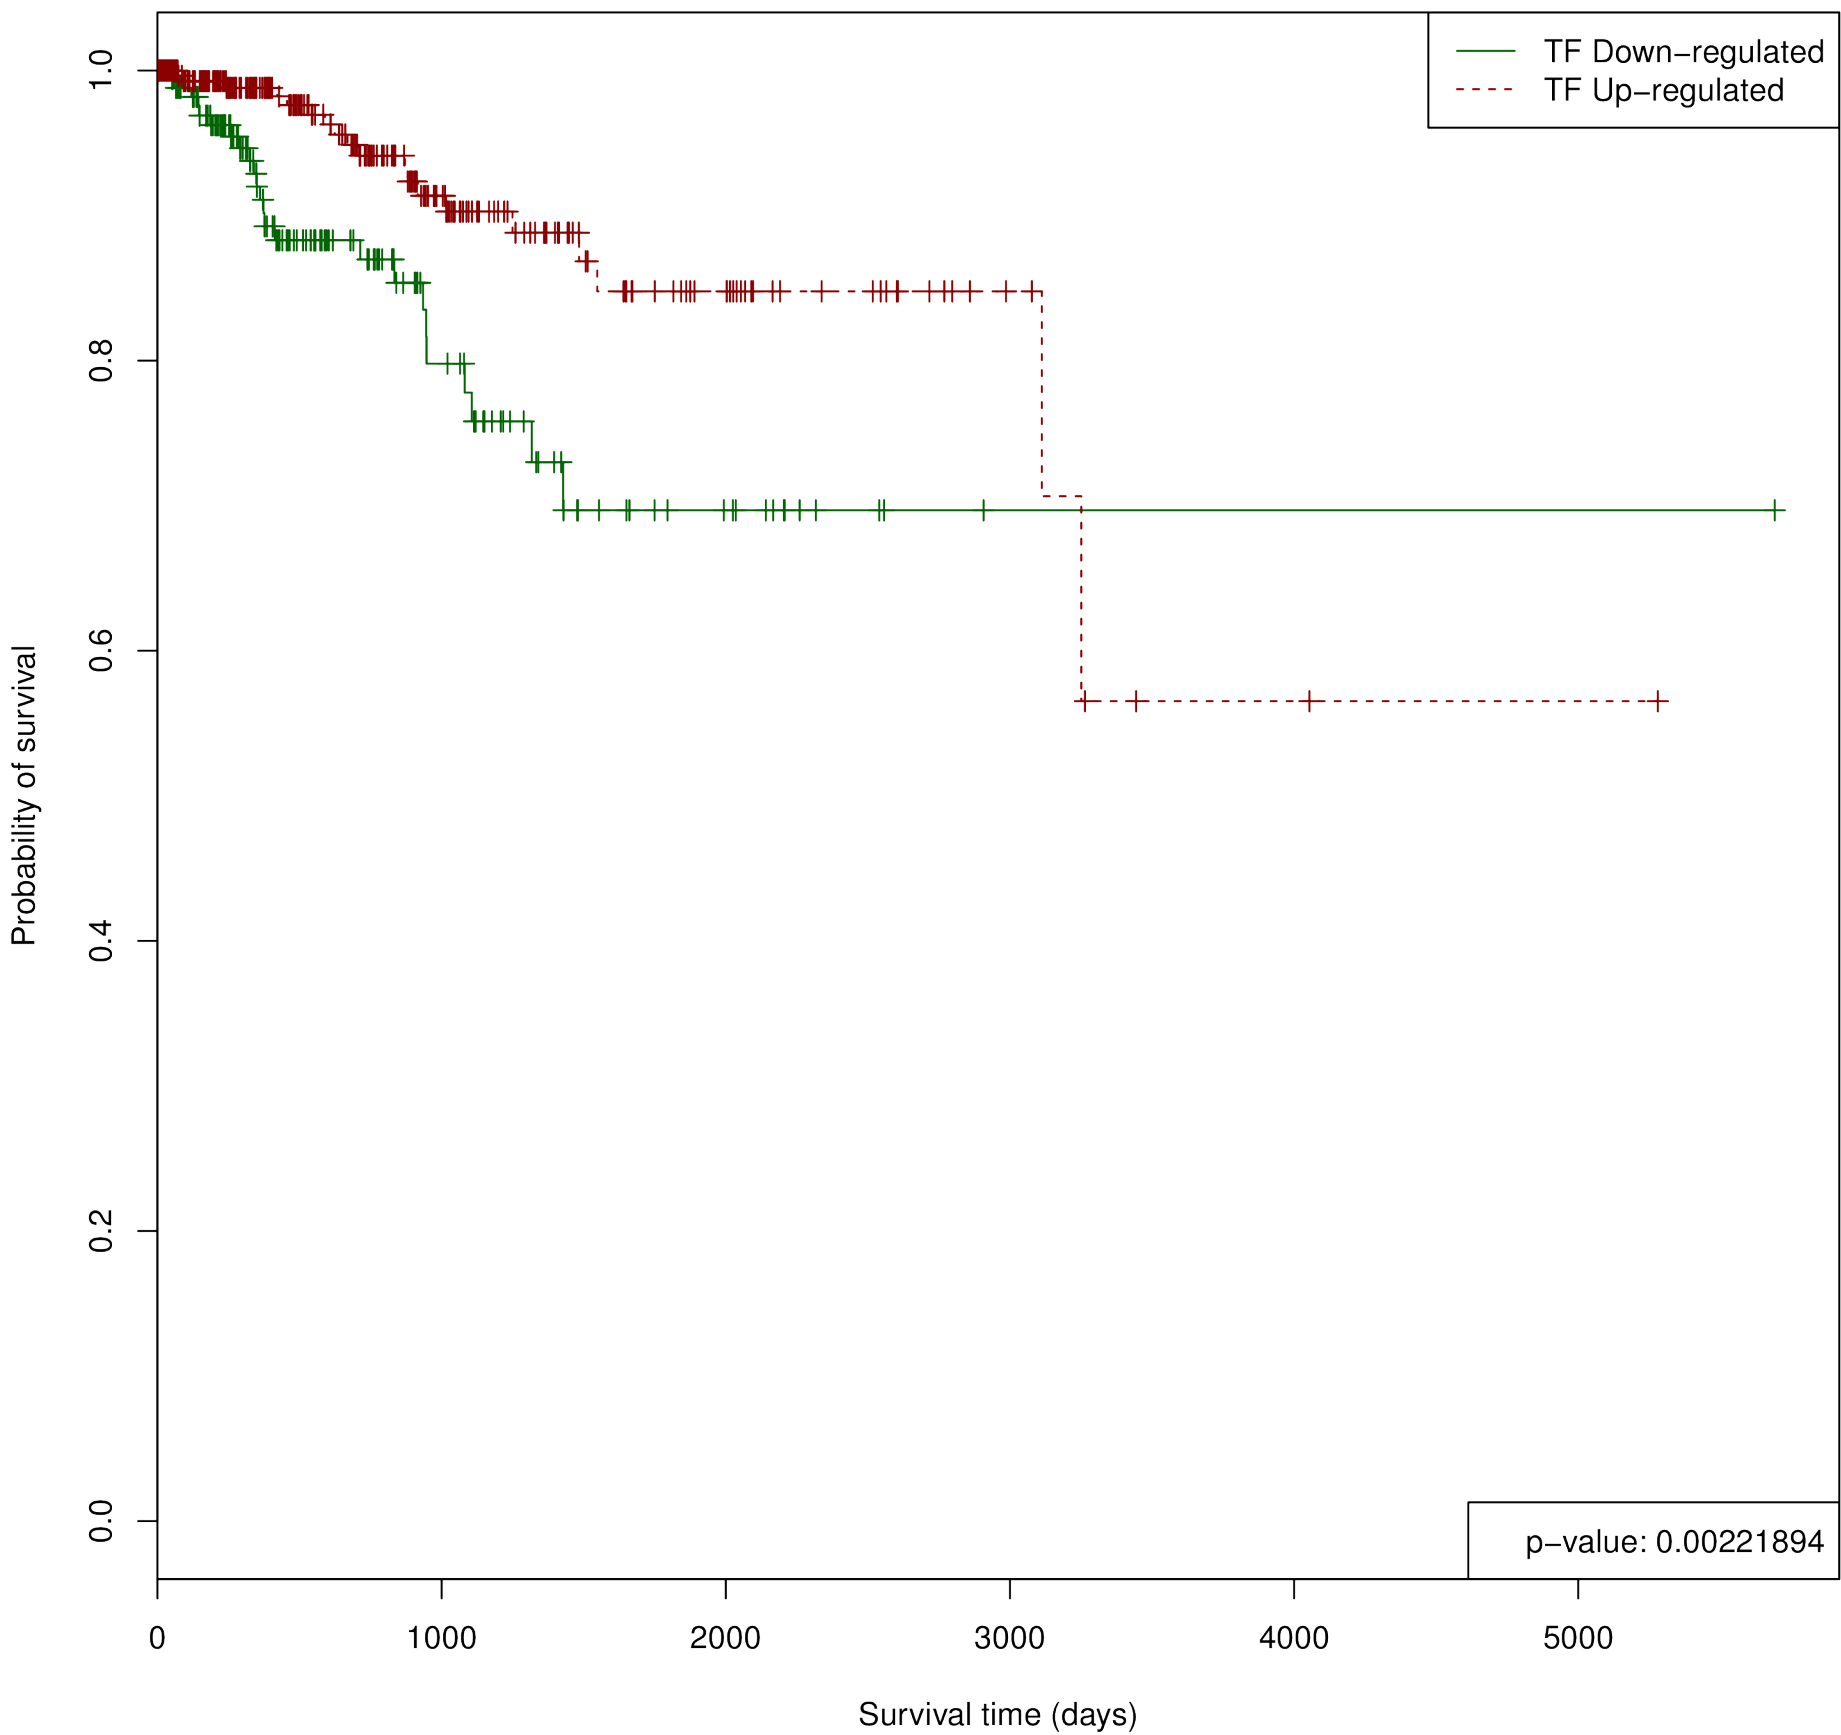

# E2F6 in COAD

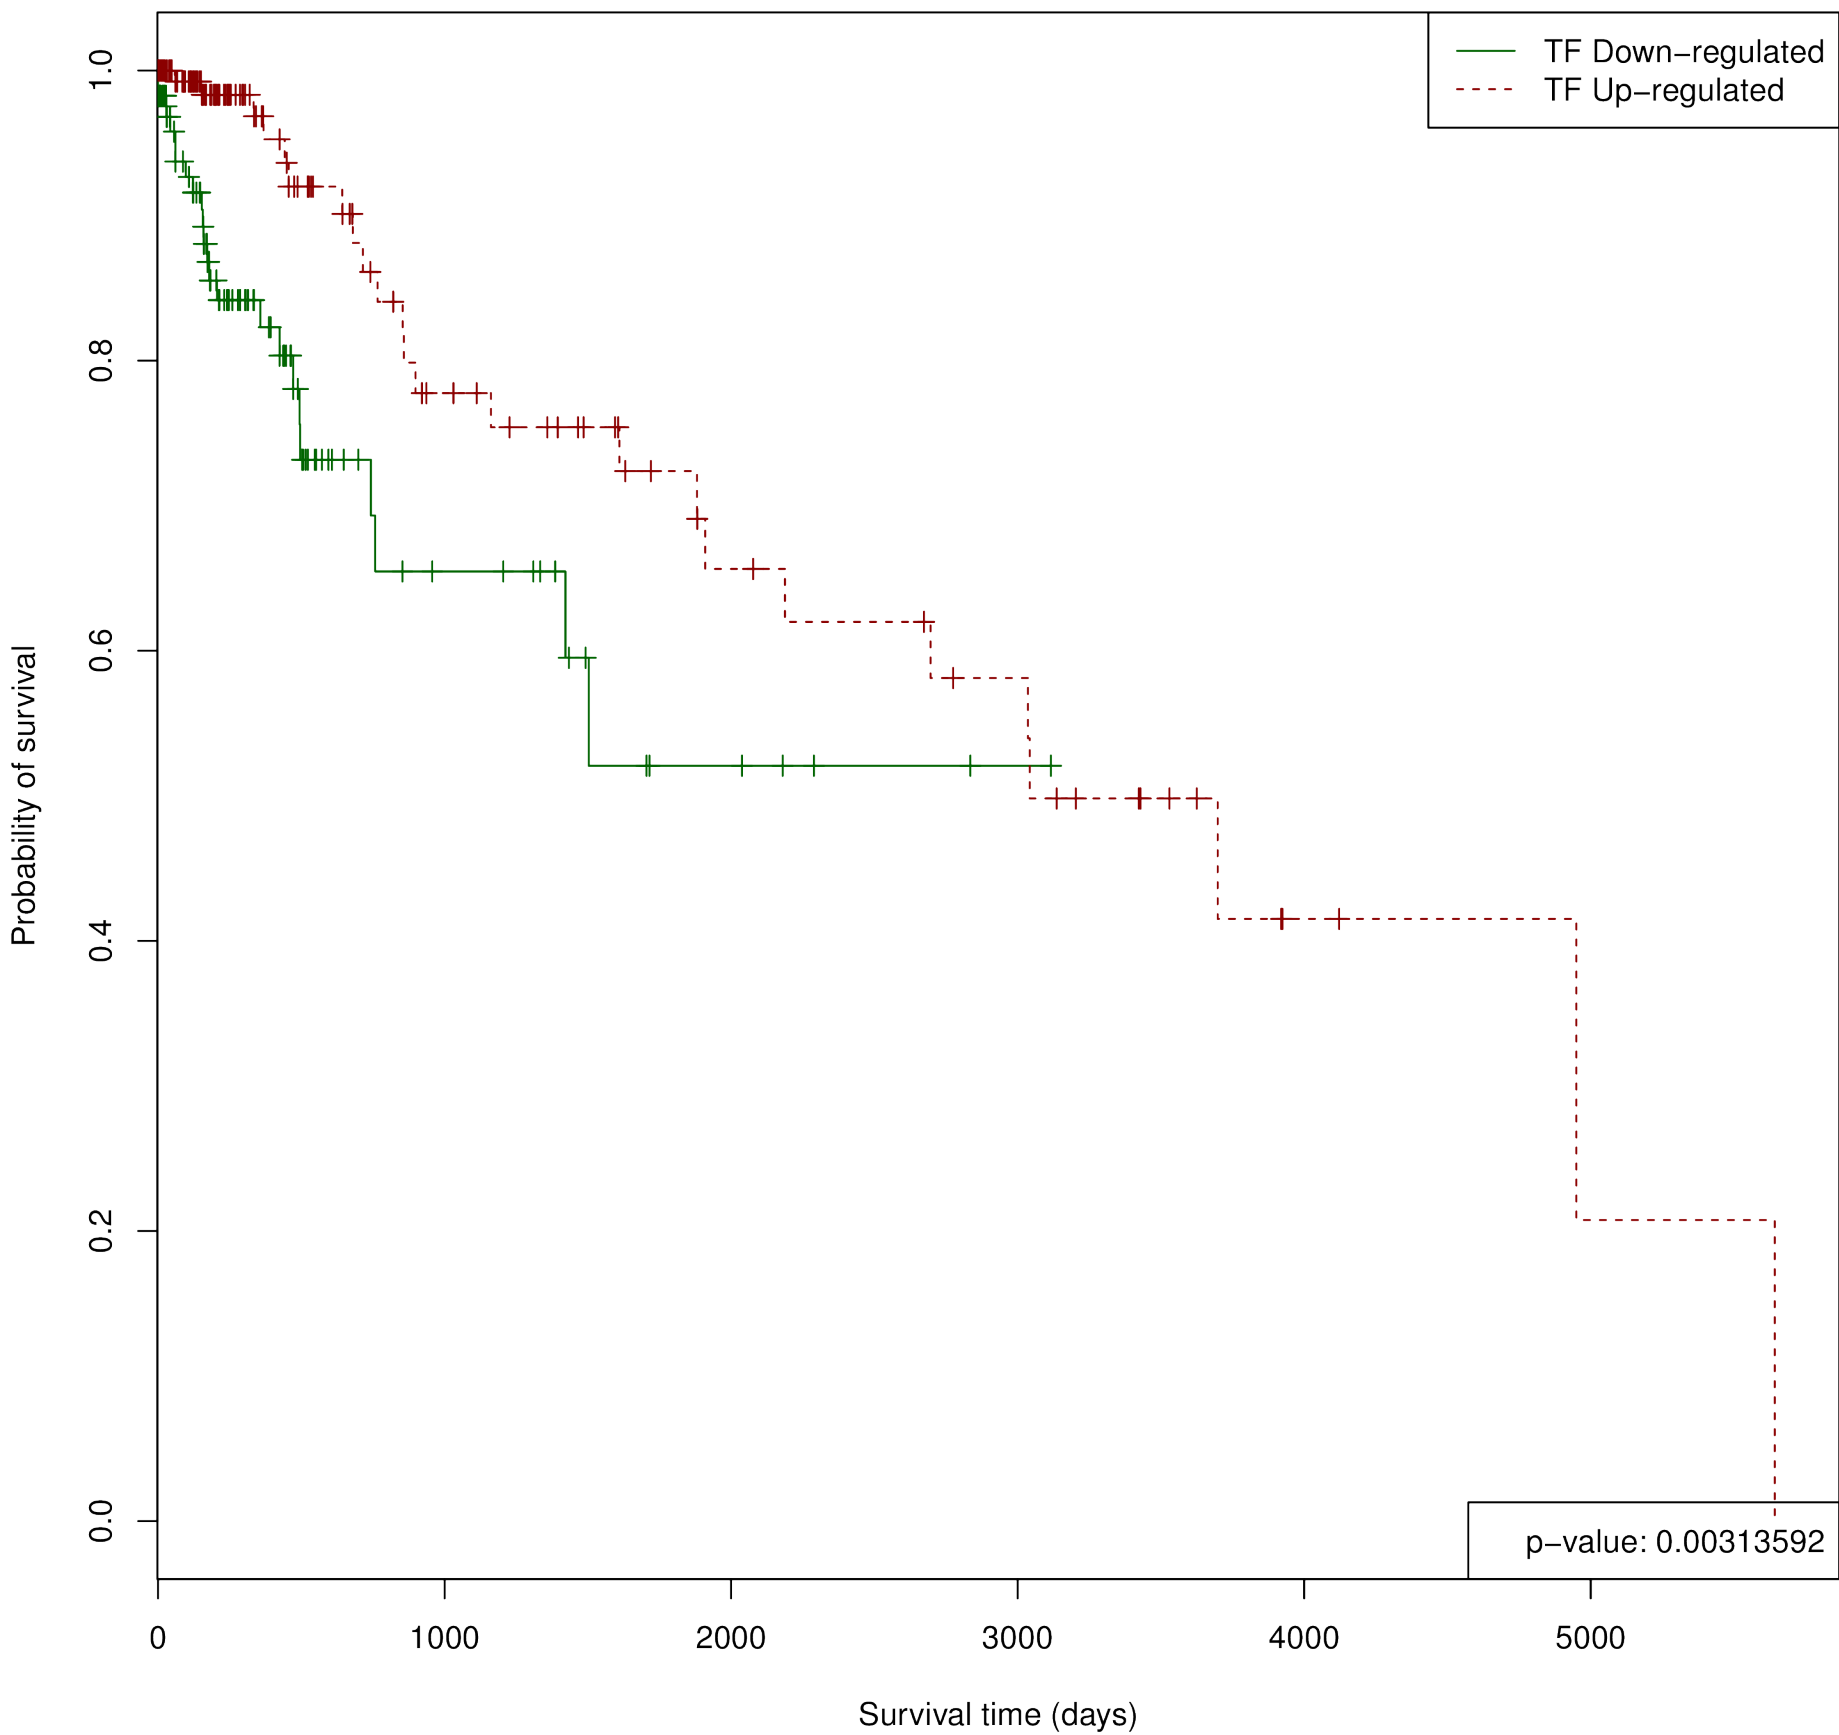

# E2F6 in KIRC

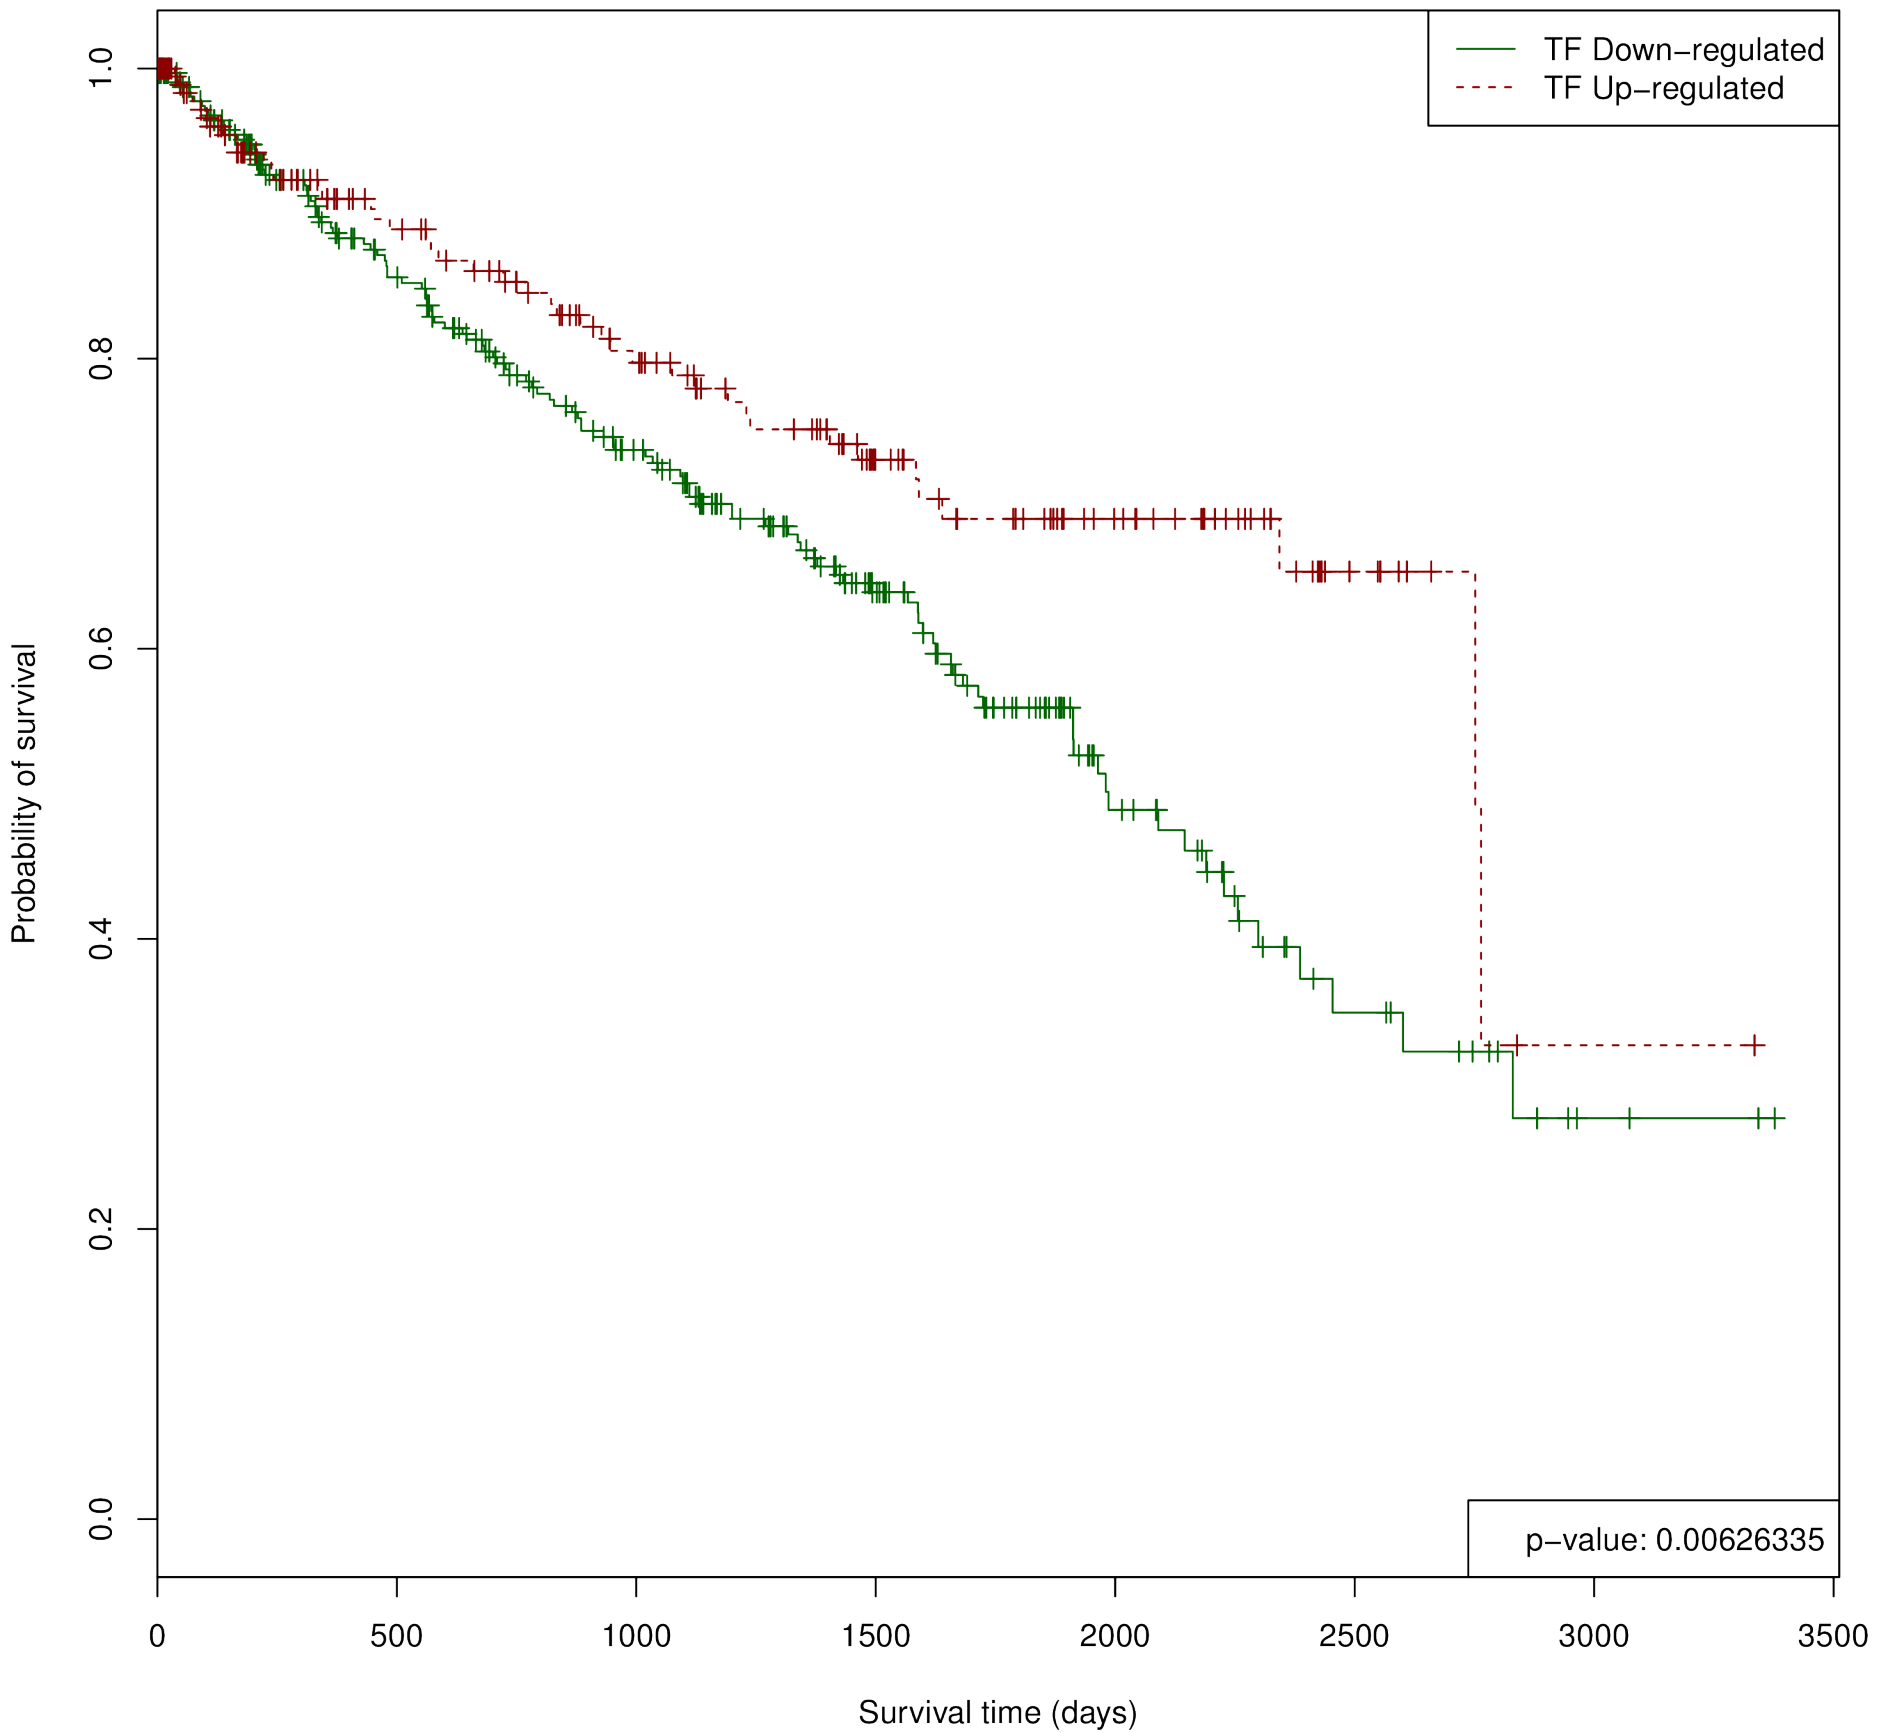

# E2F6 in UCEC

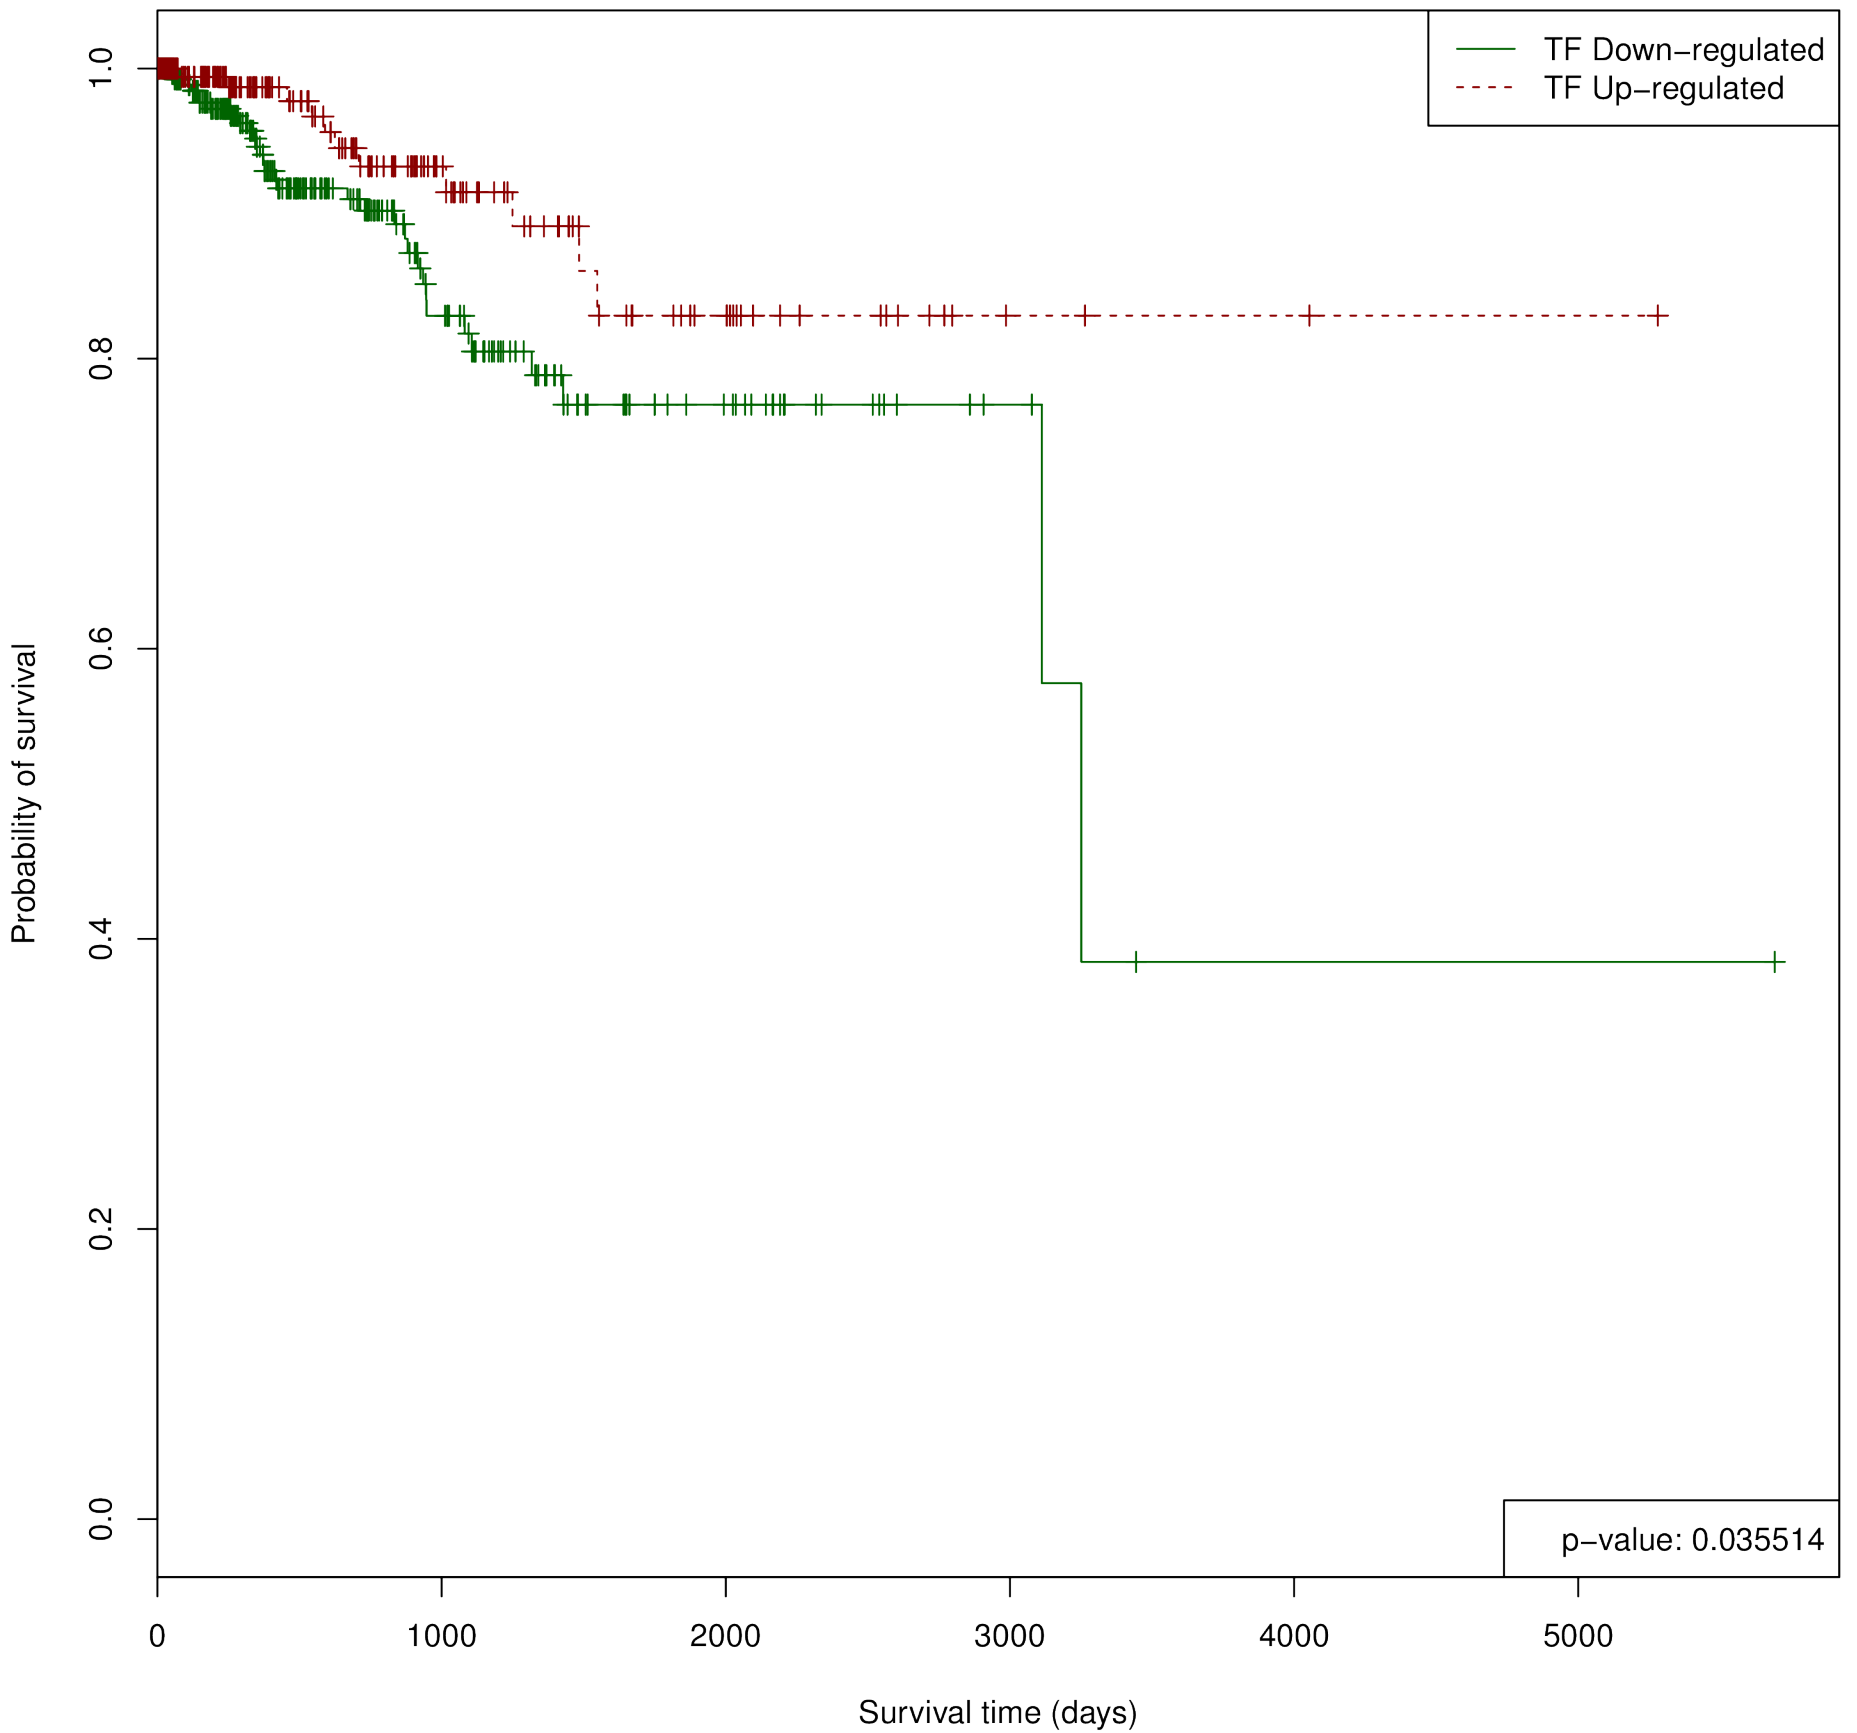



# EBF1 in BLCA

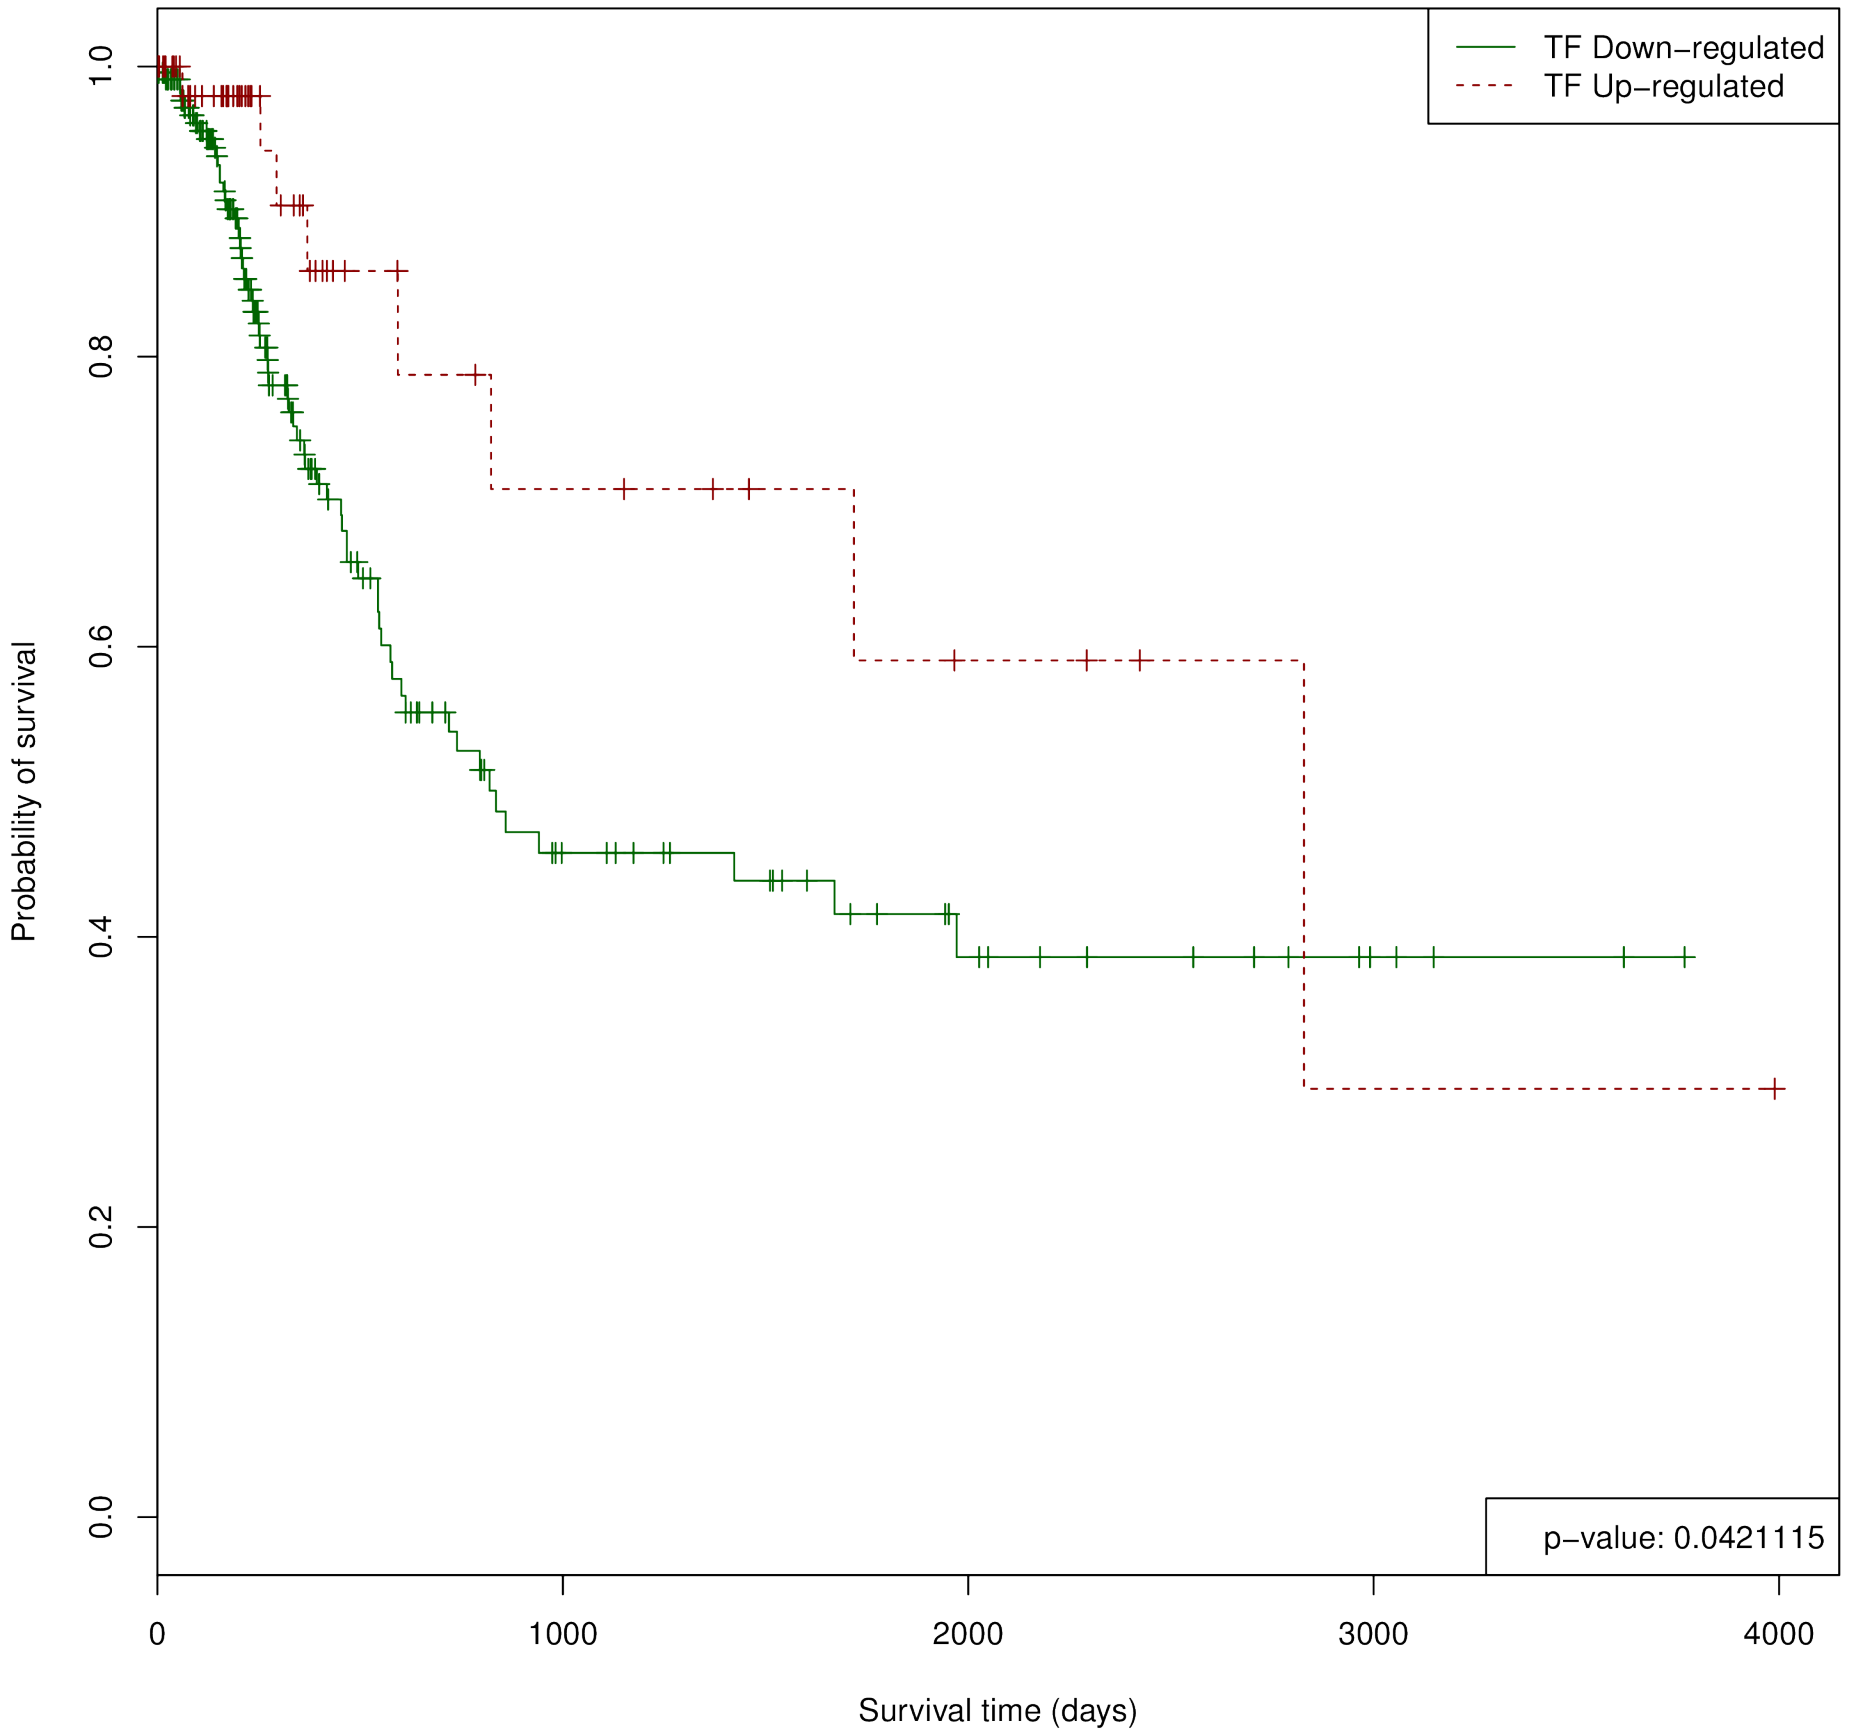

# EBF1 in BRCA

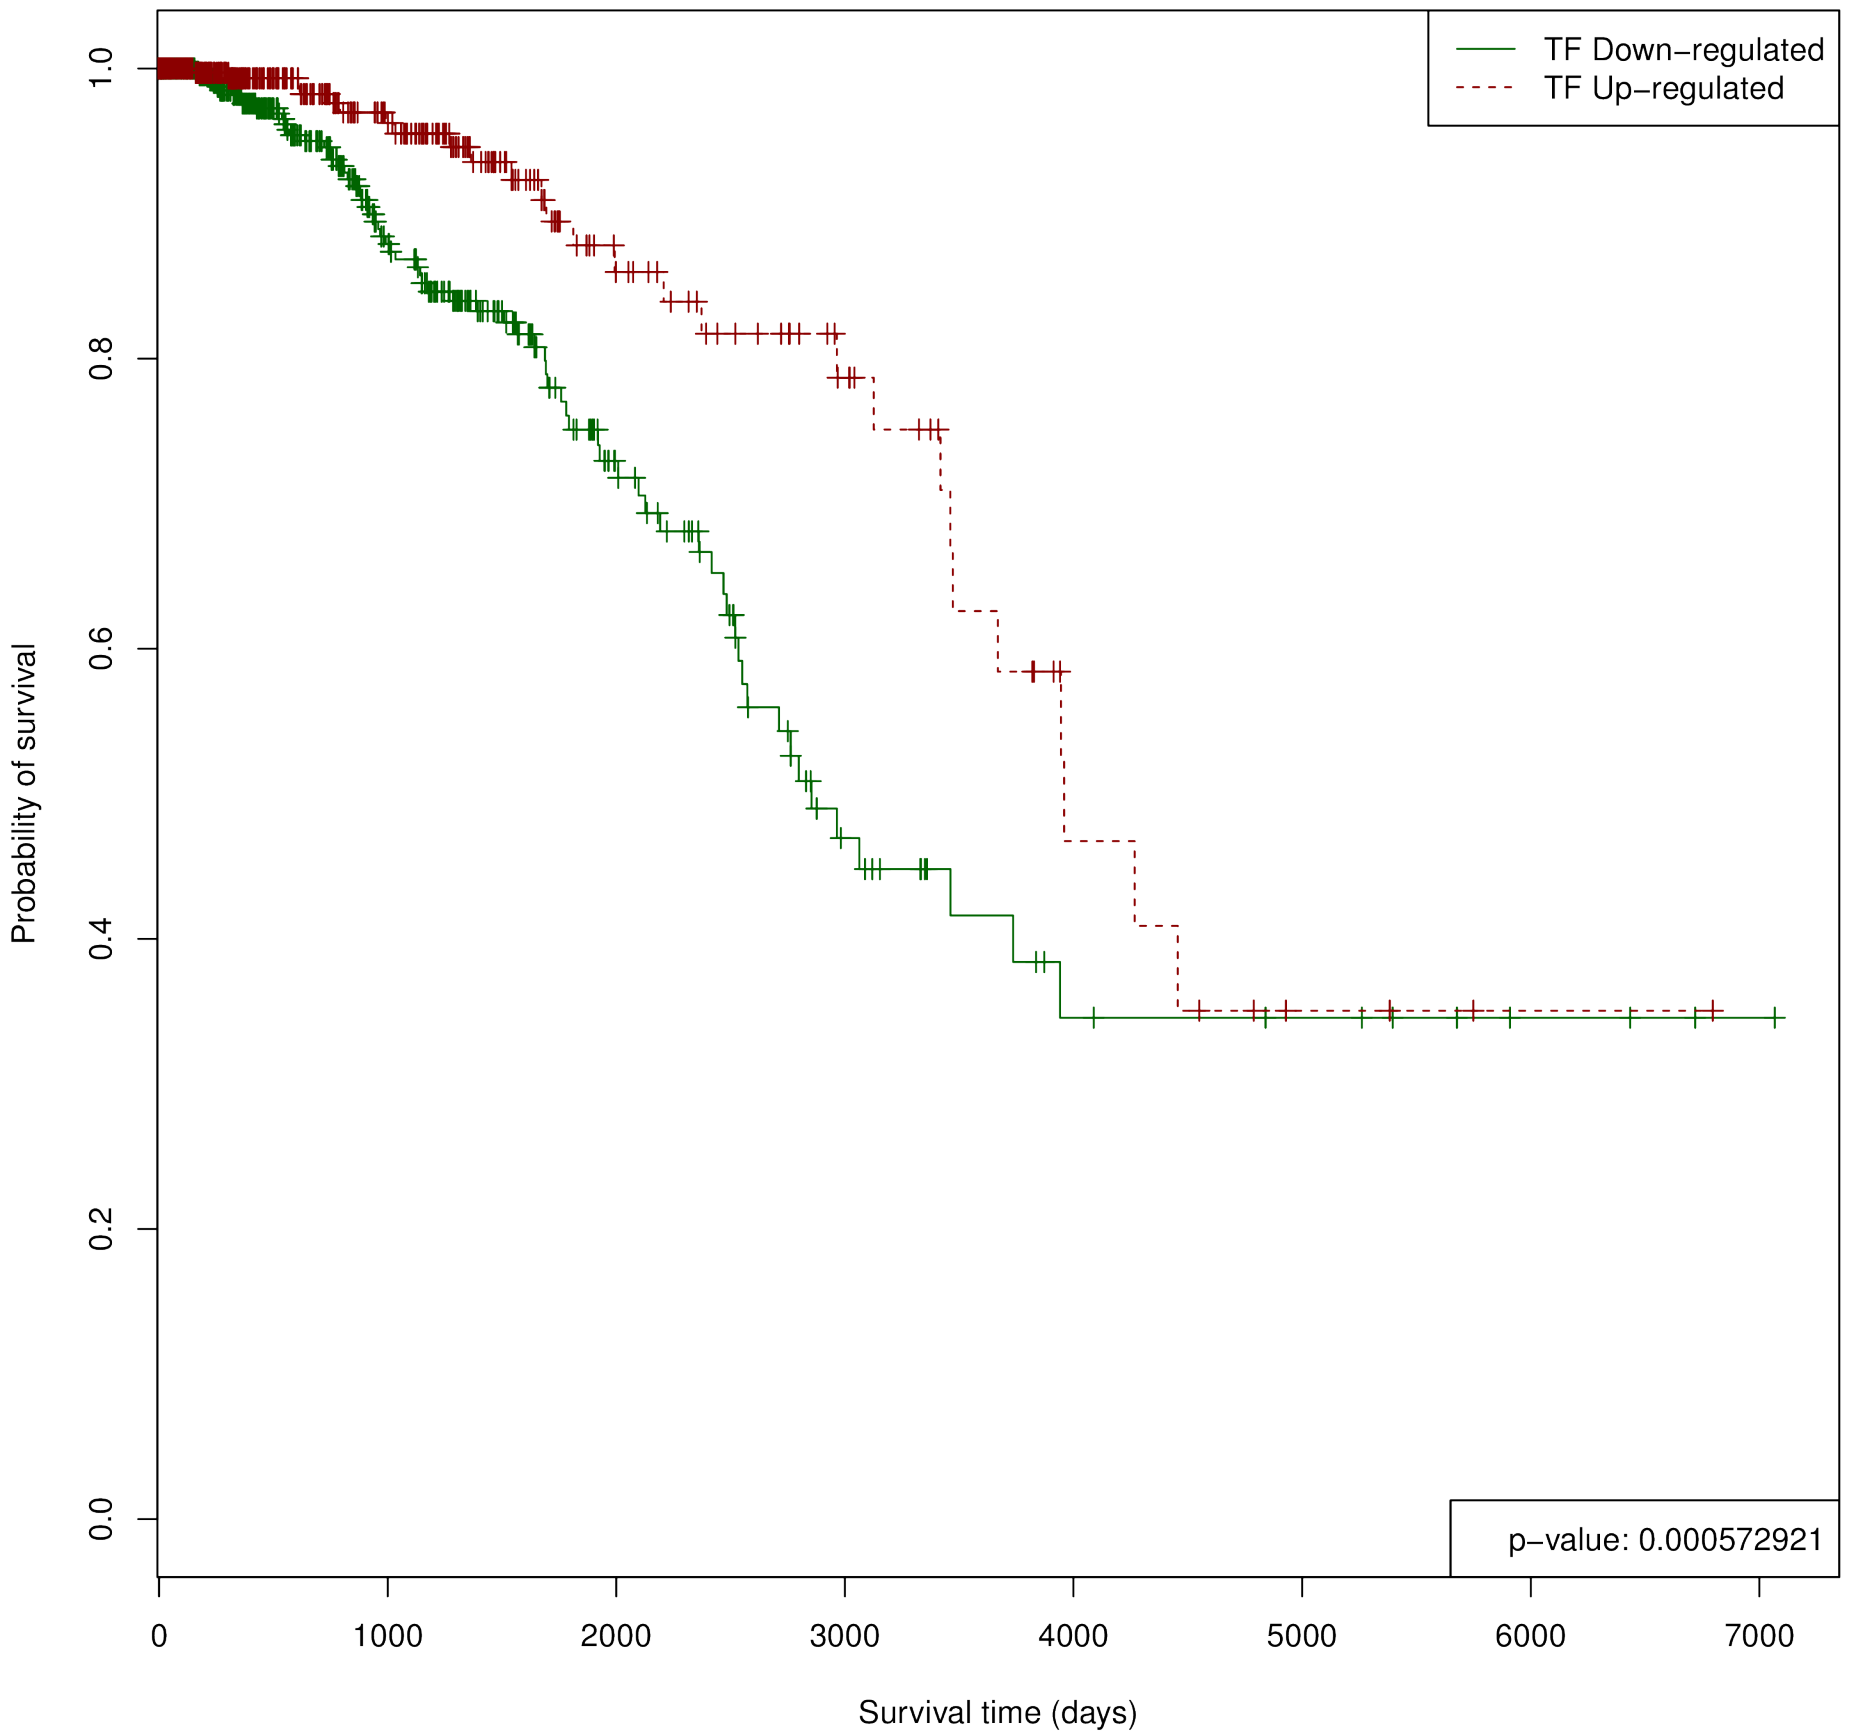

# EBF1 in COAD

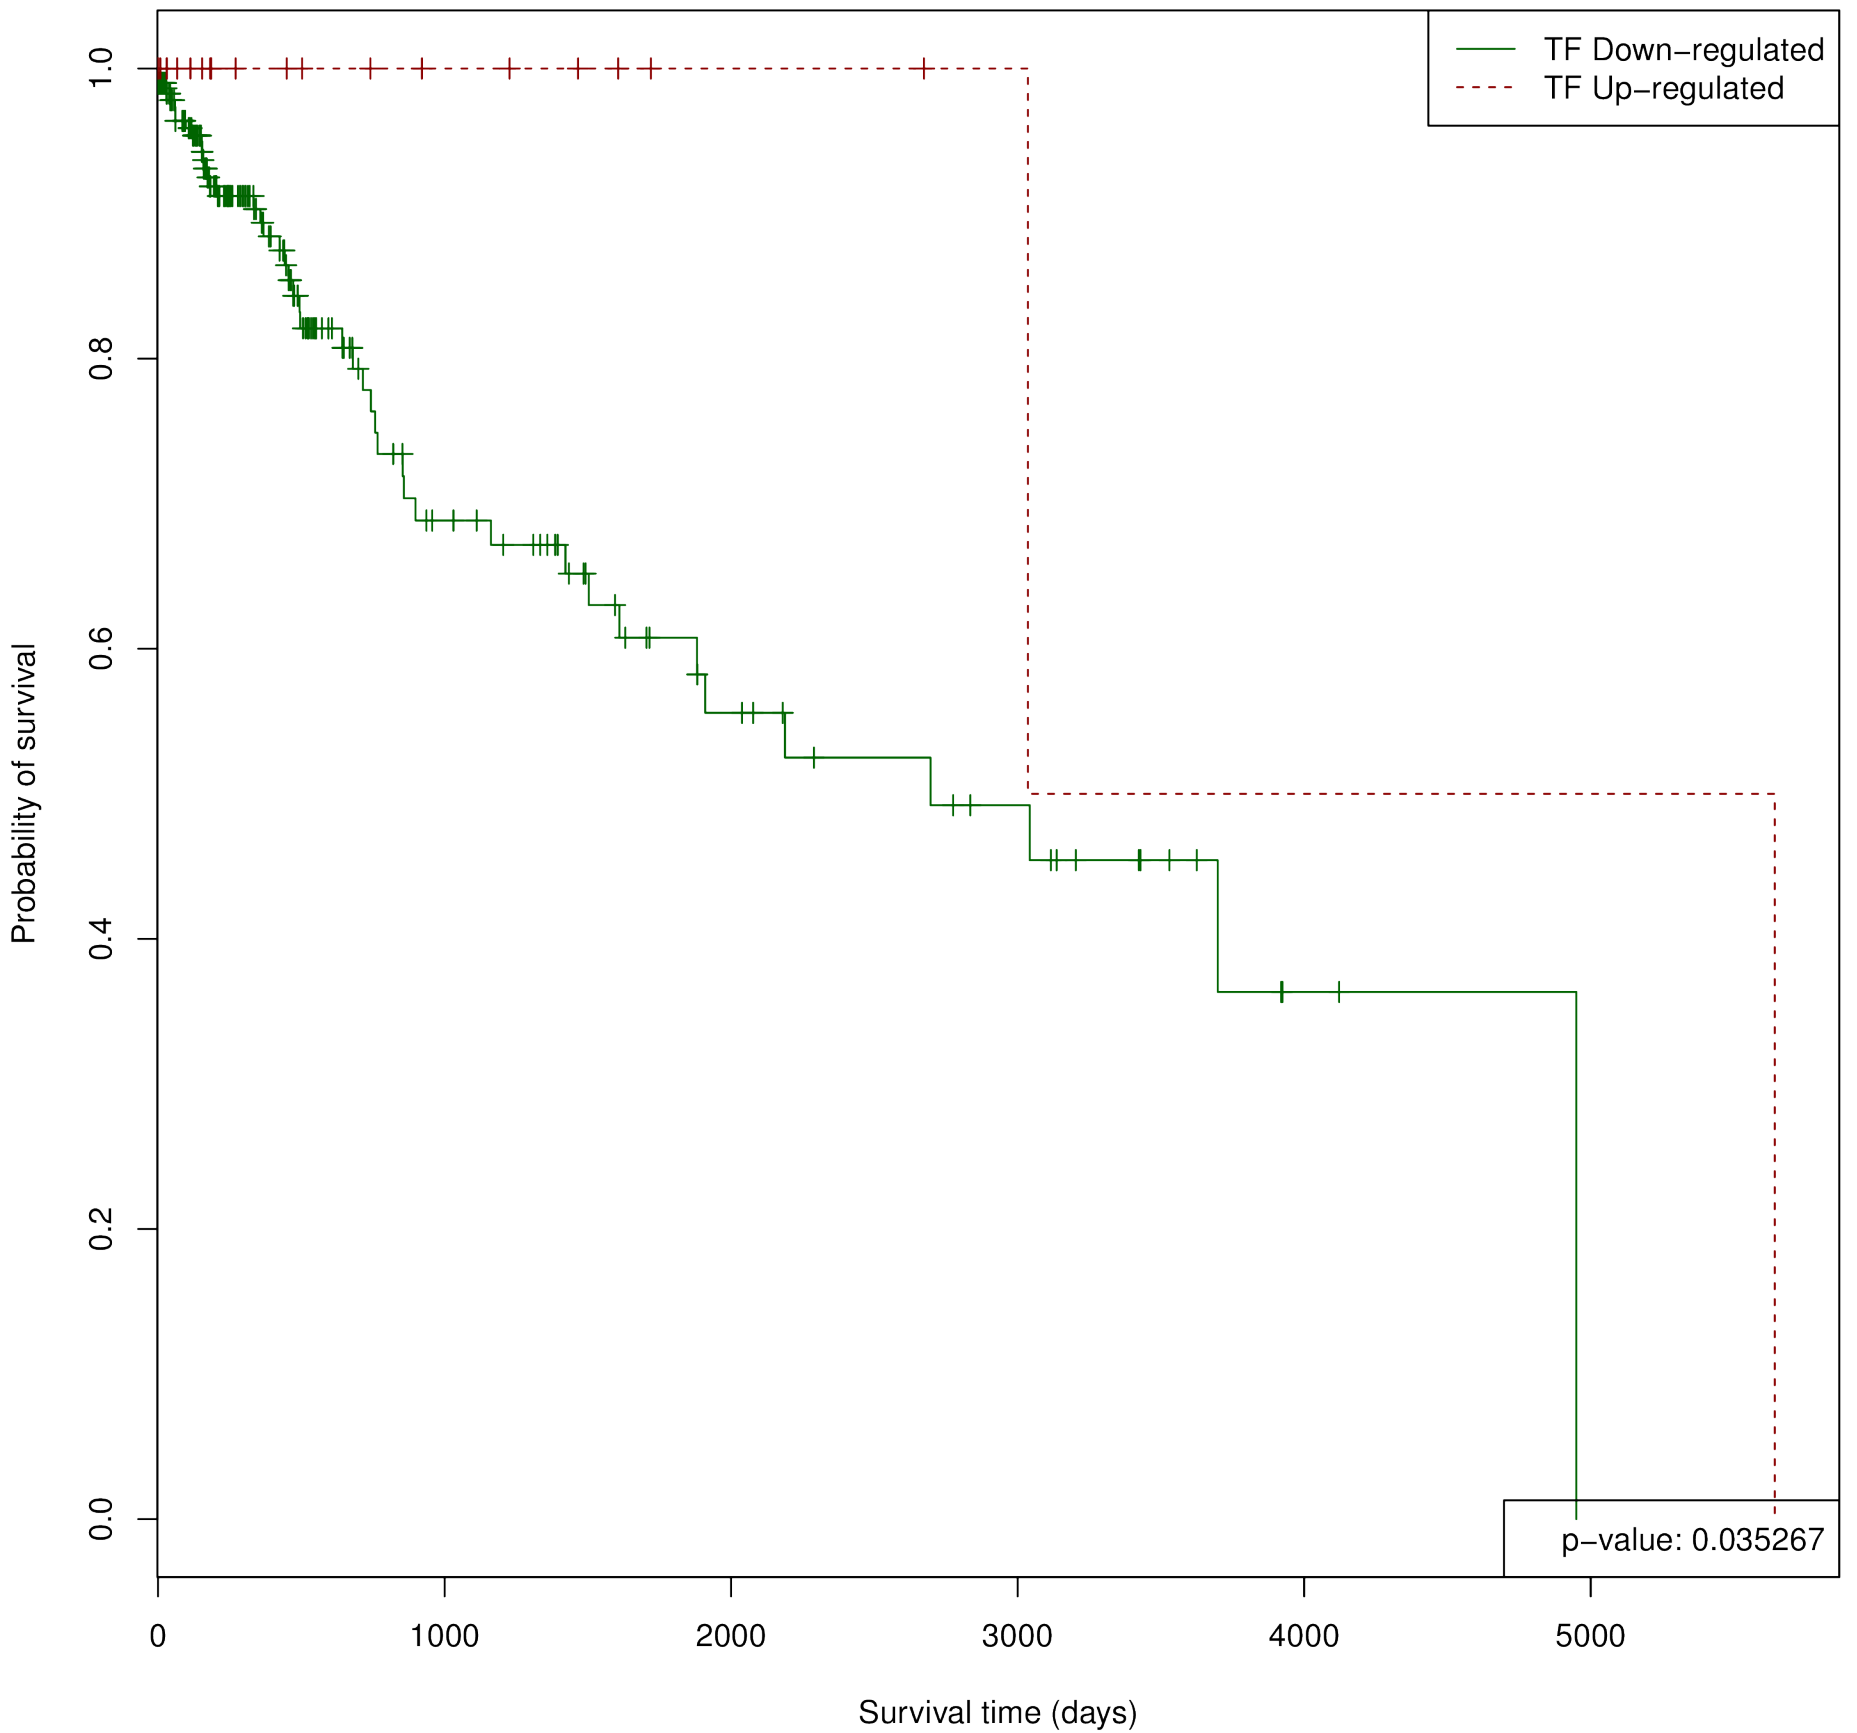

# EBF1 in THCA

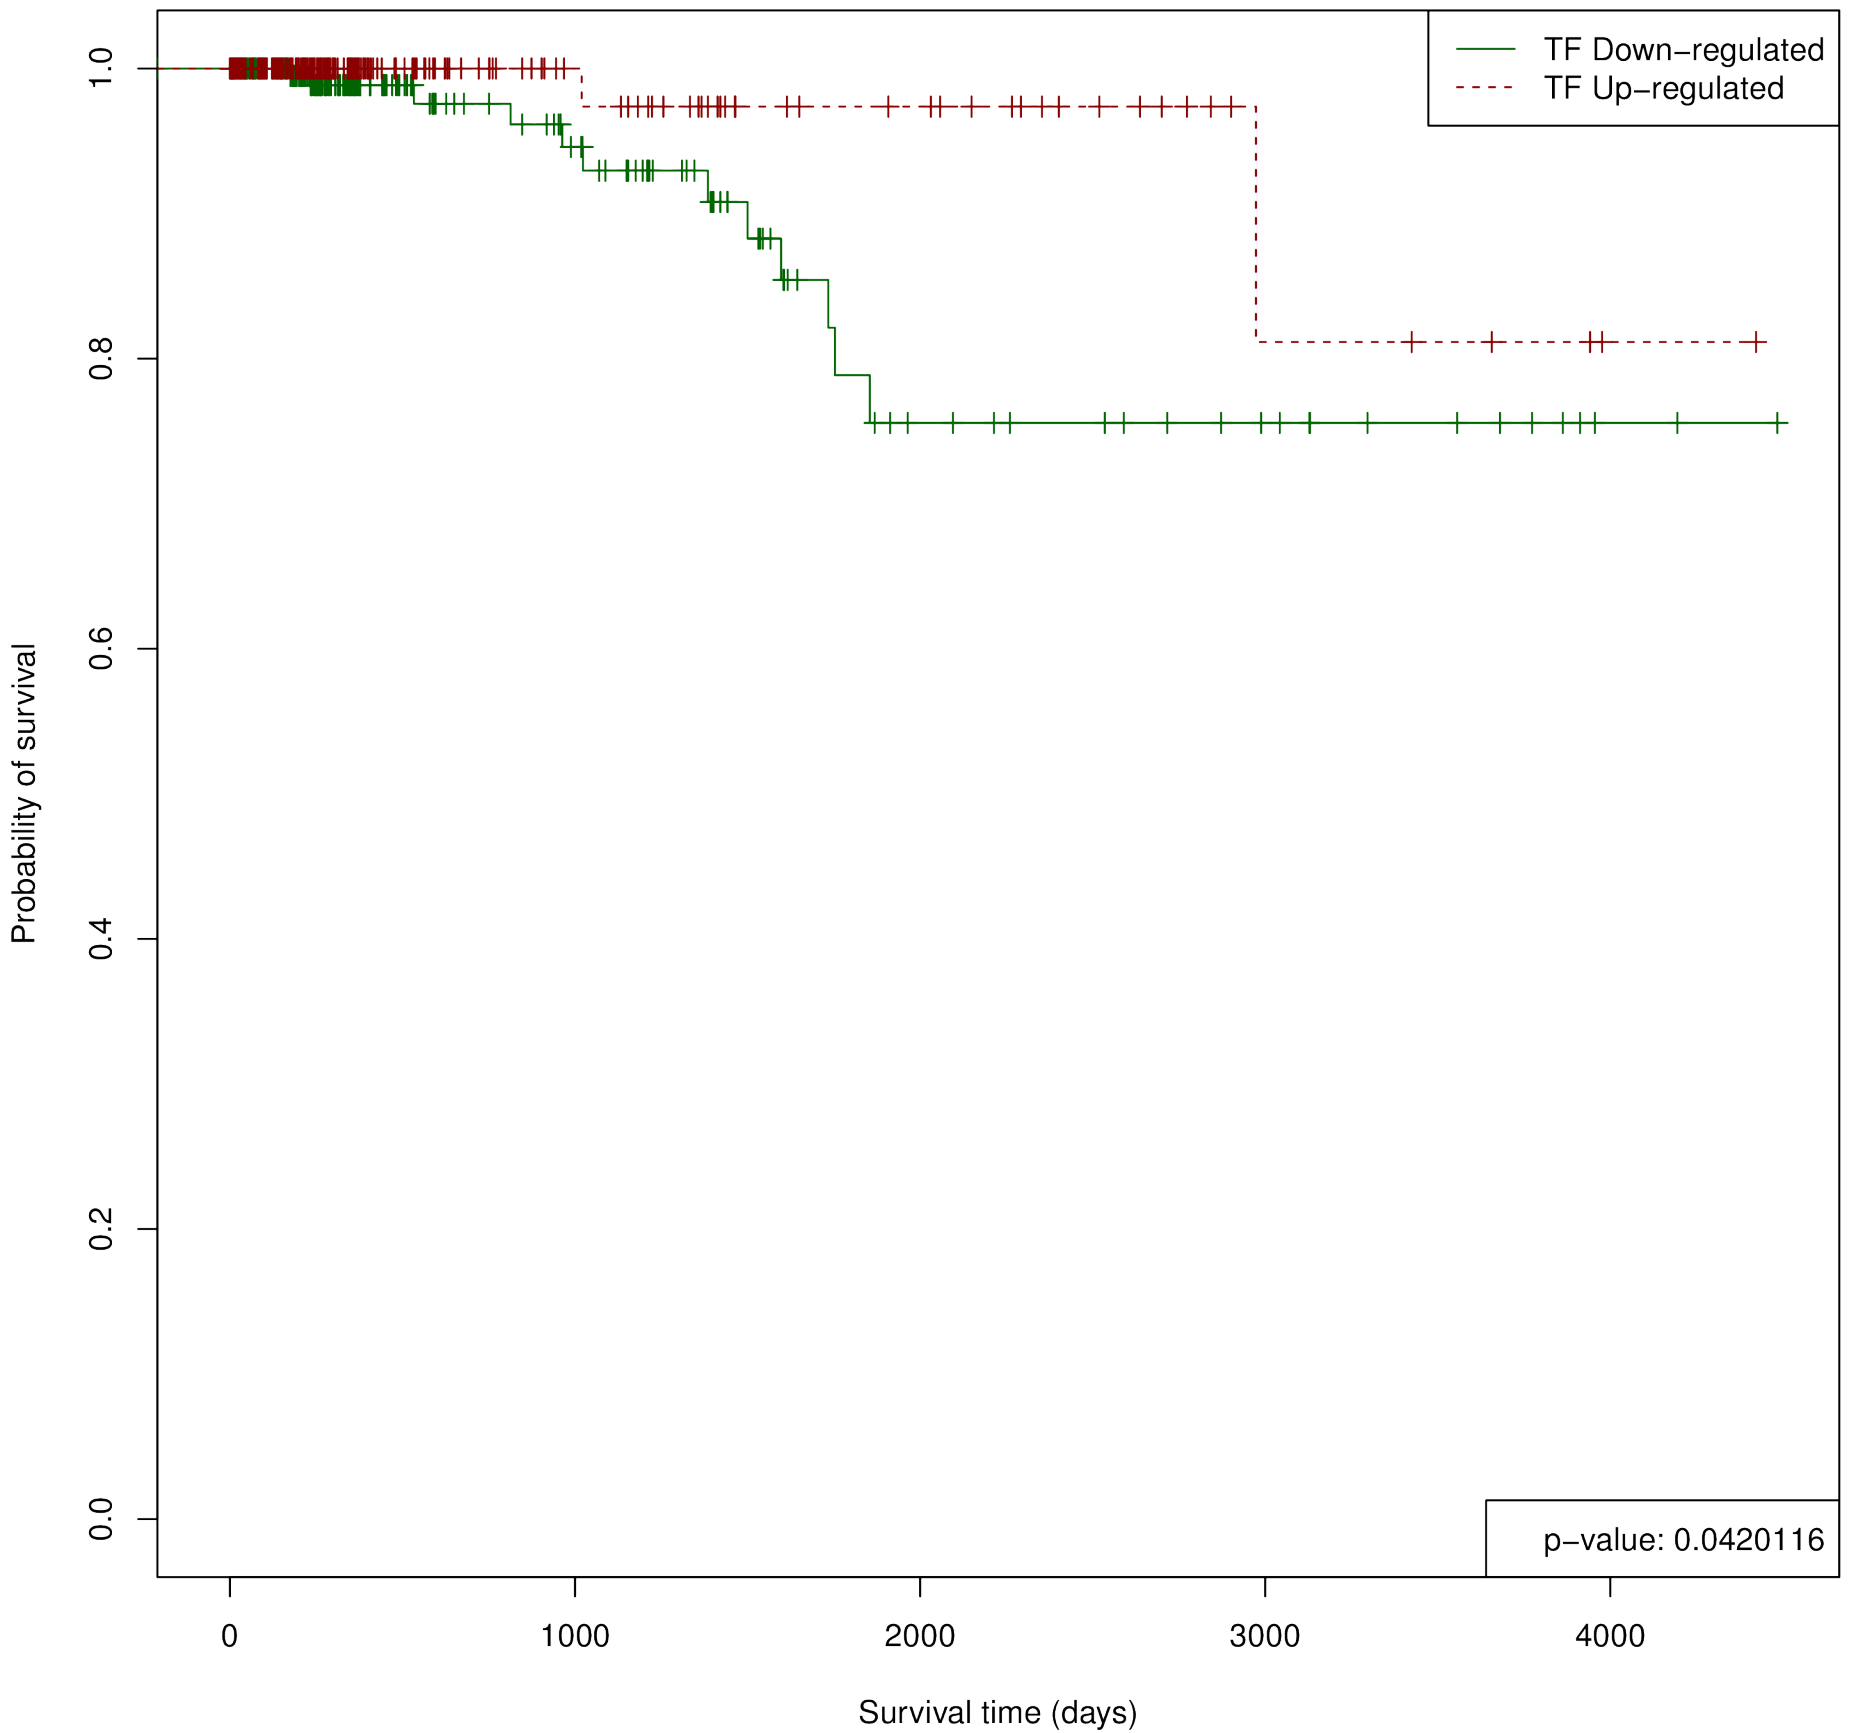

# ECR::USP in THCA

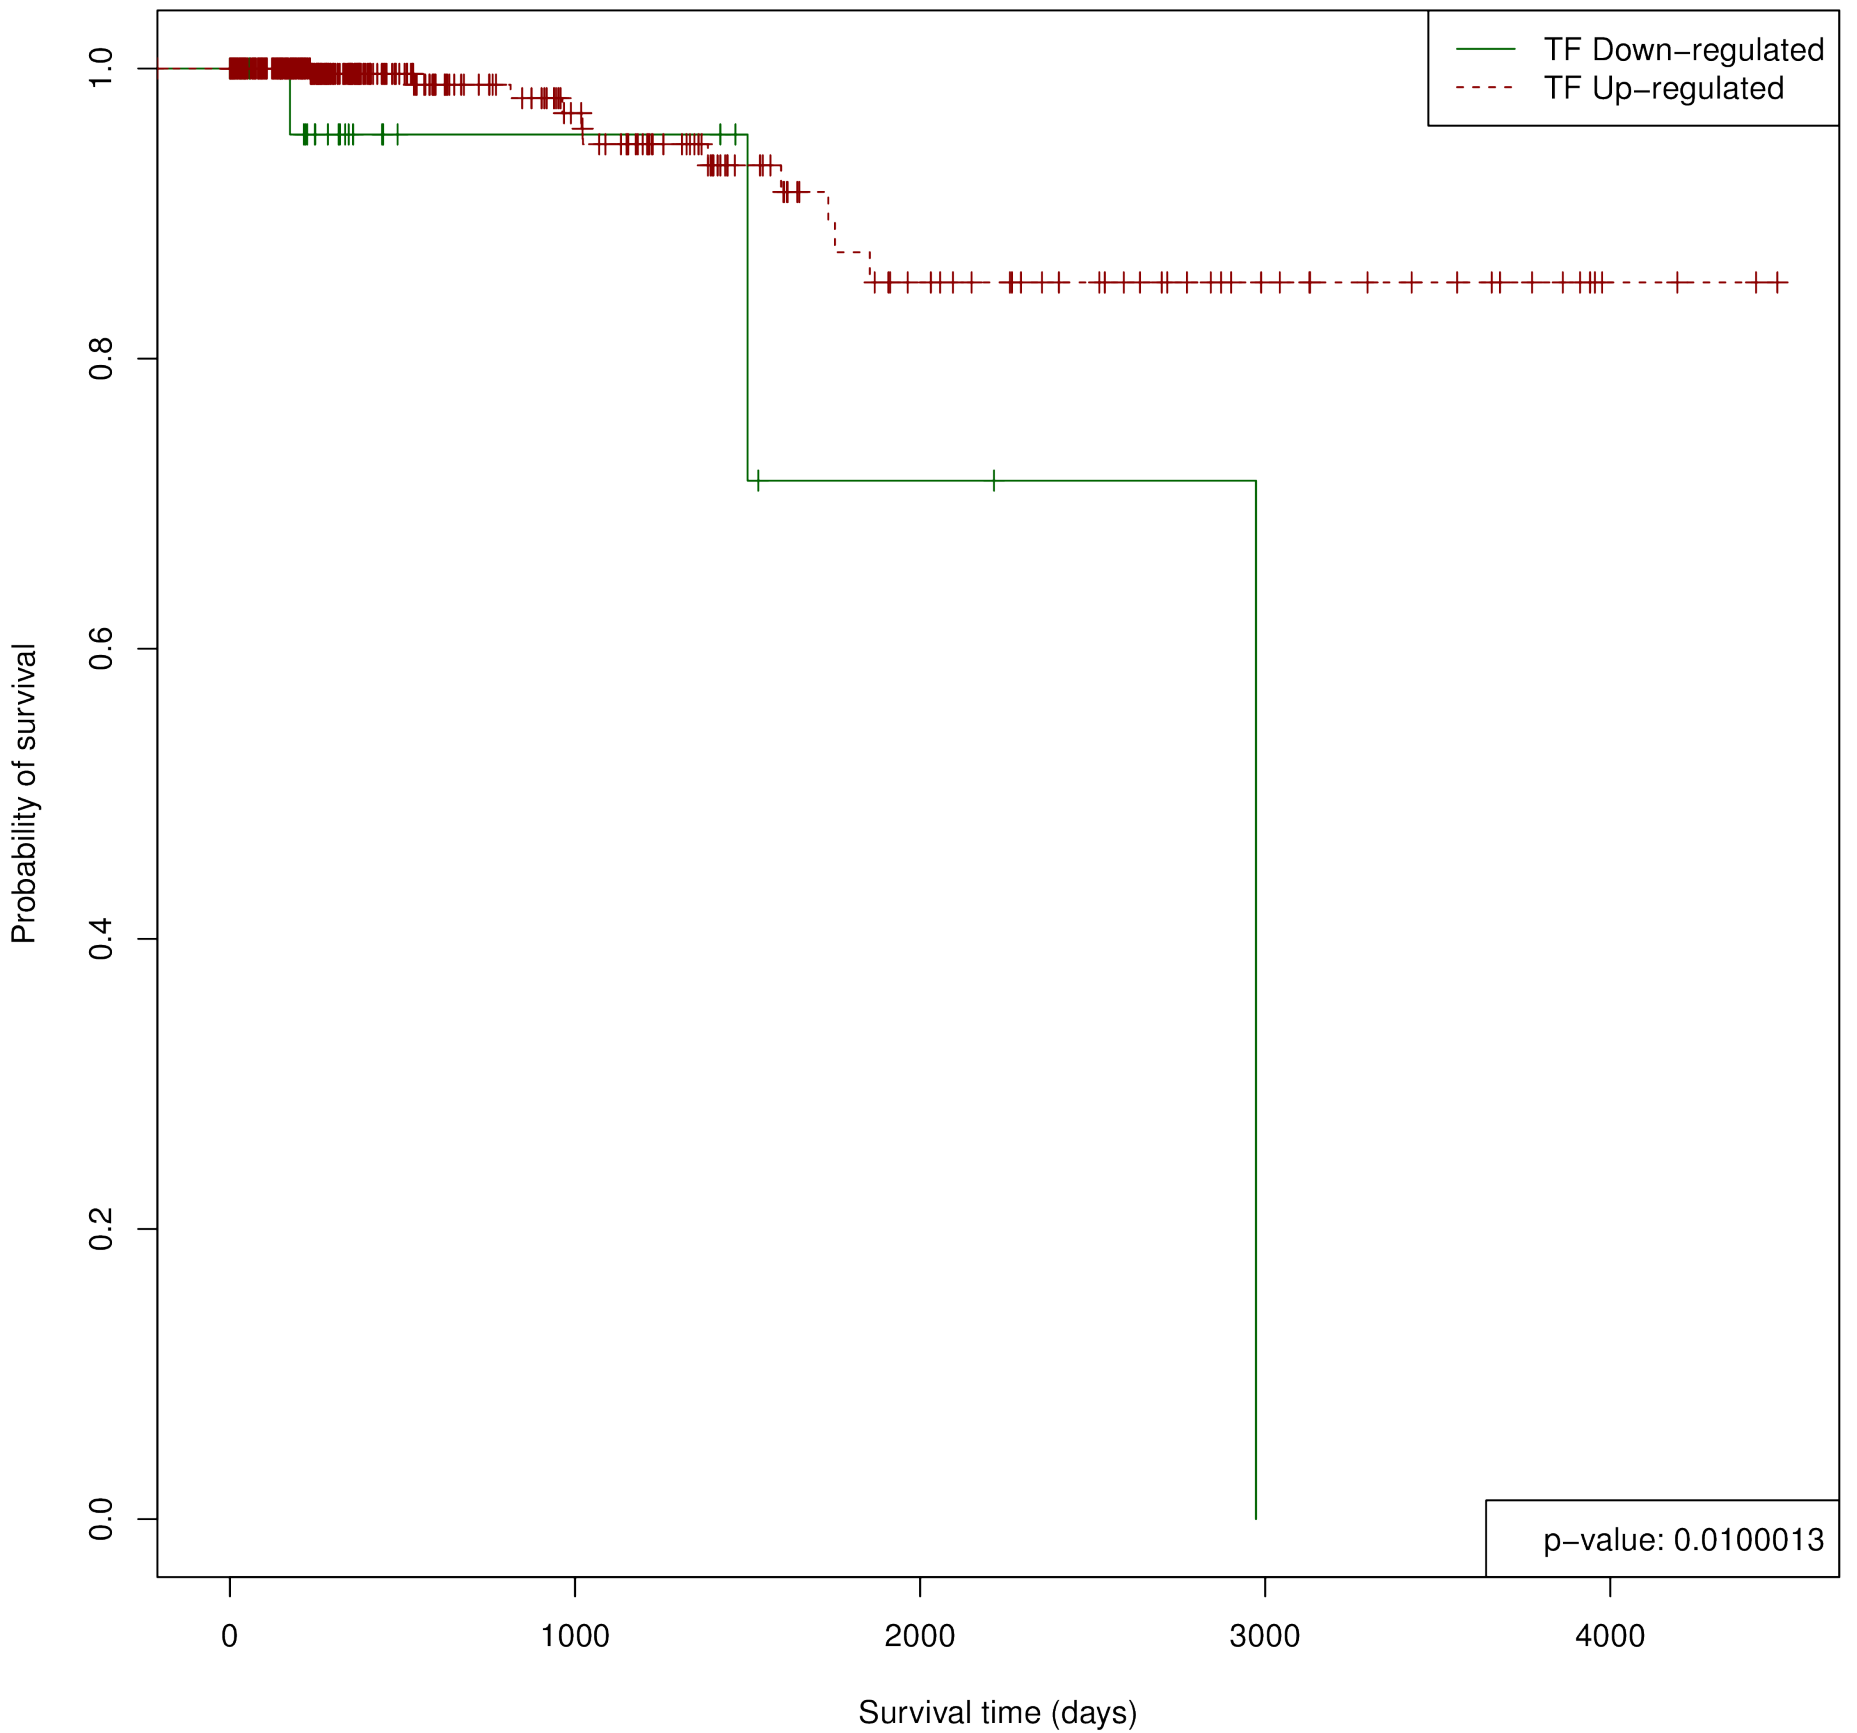

# EGR1 in KIRC

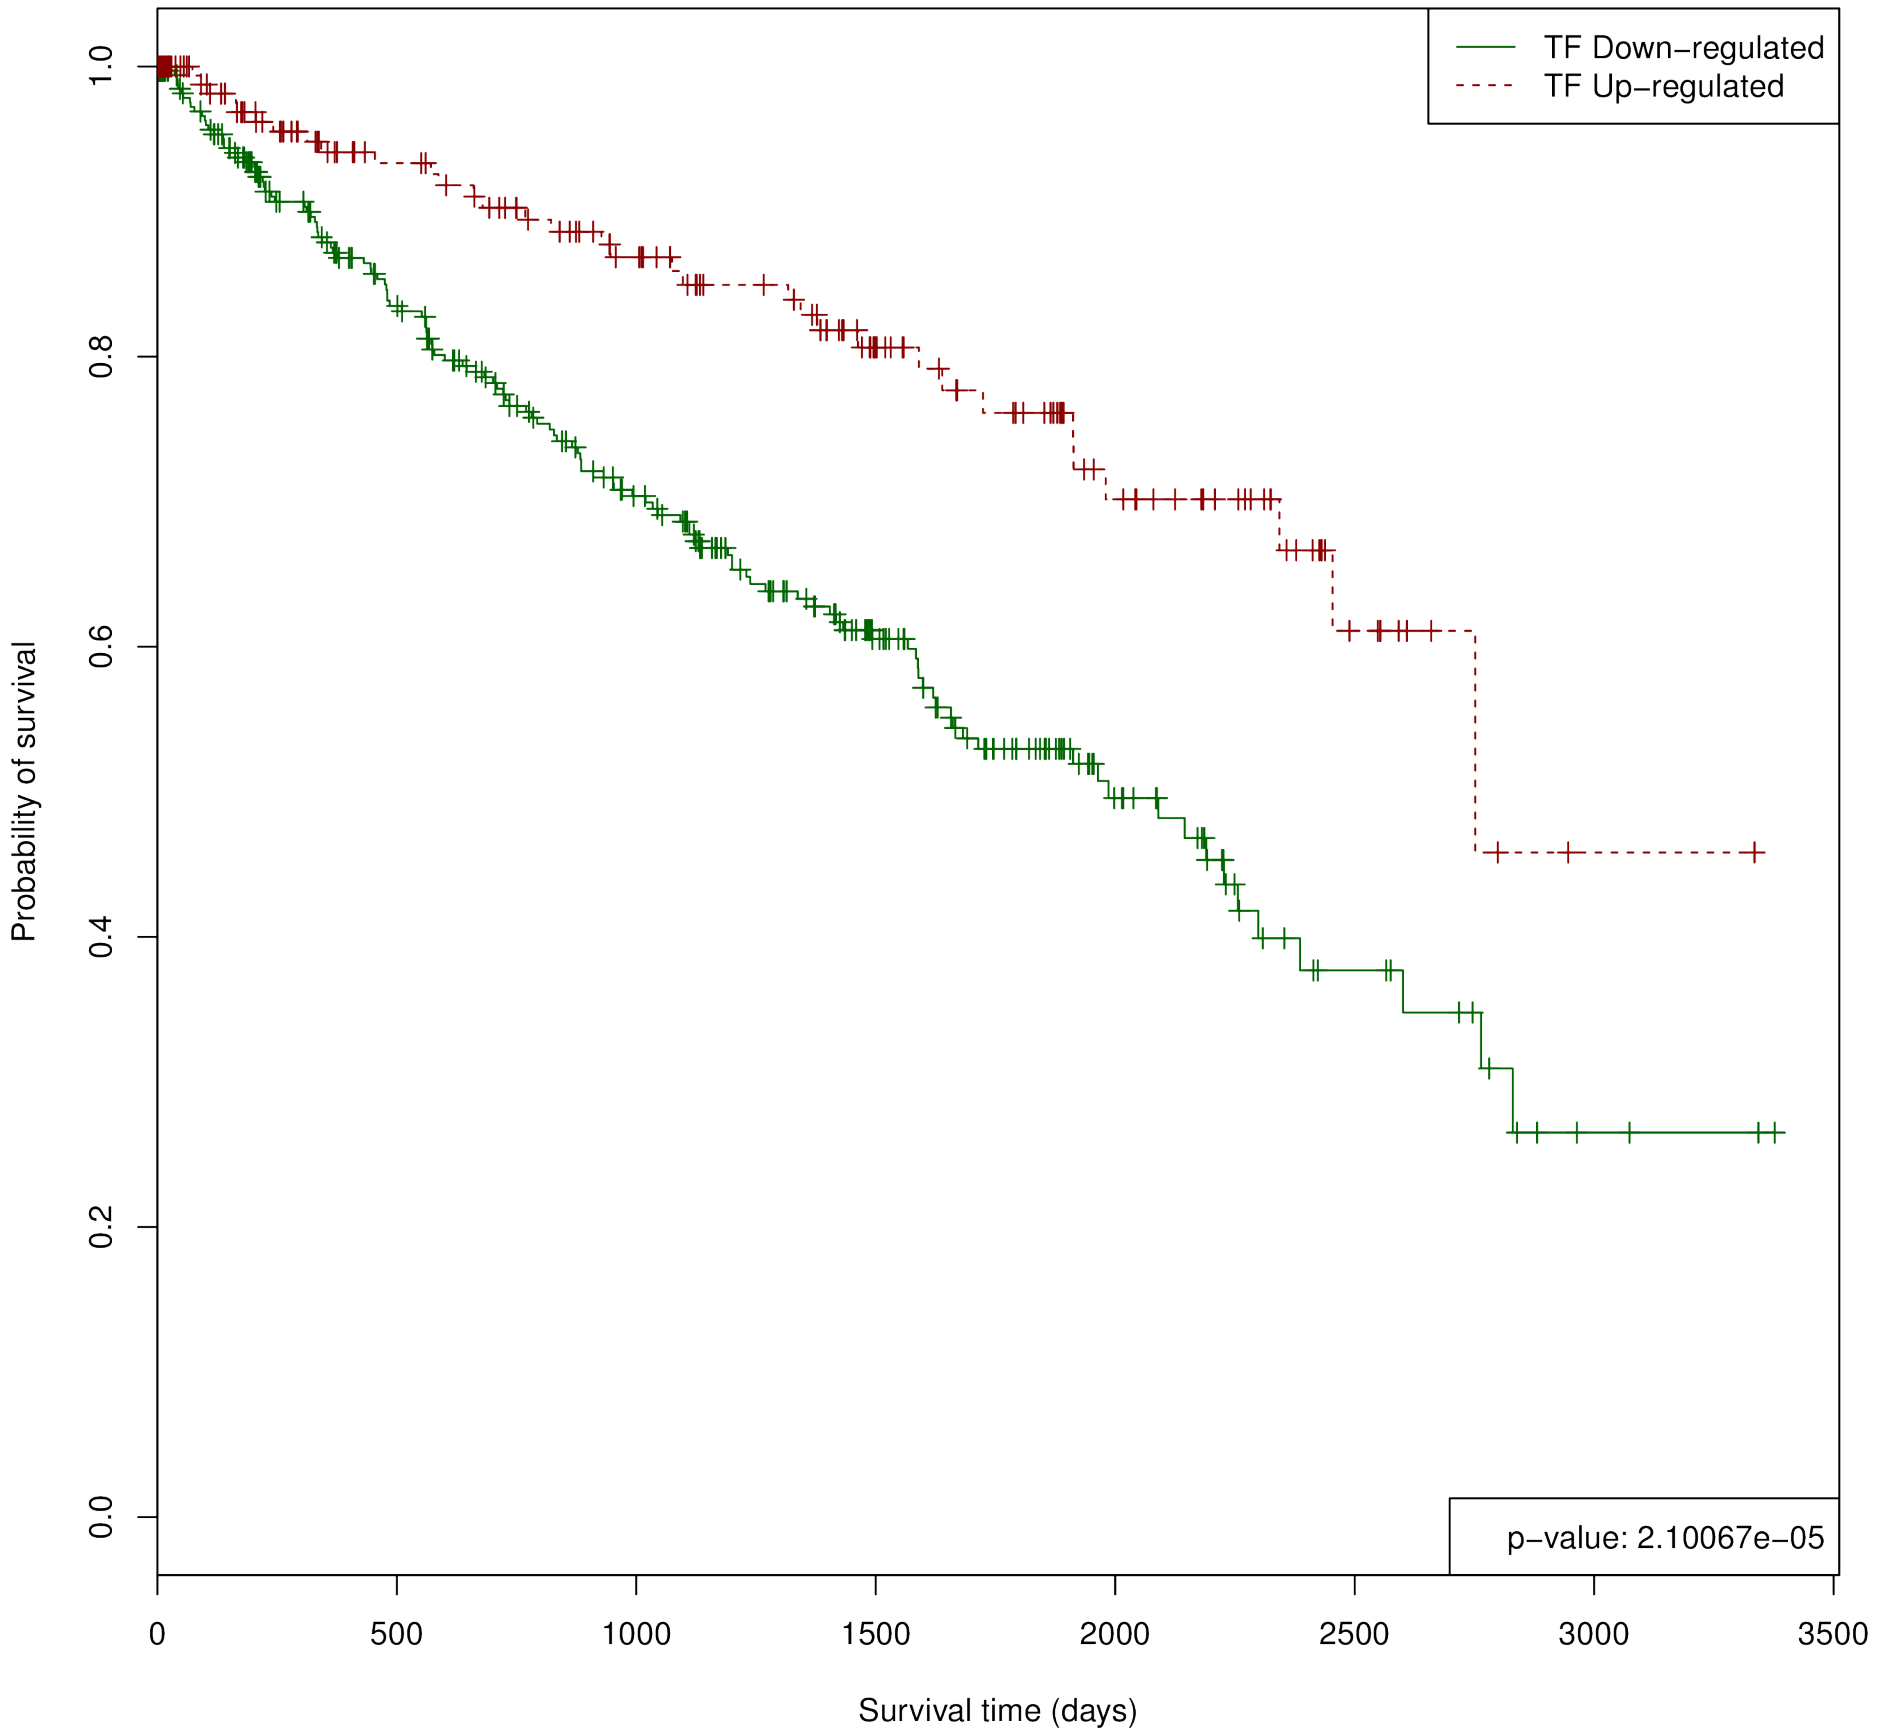

# EGR1 in LIHC

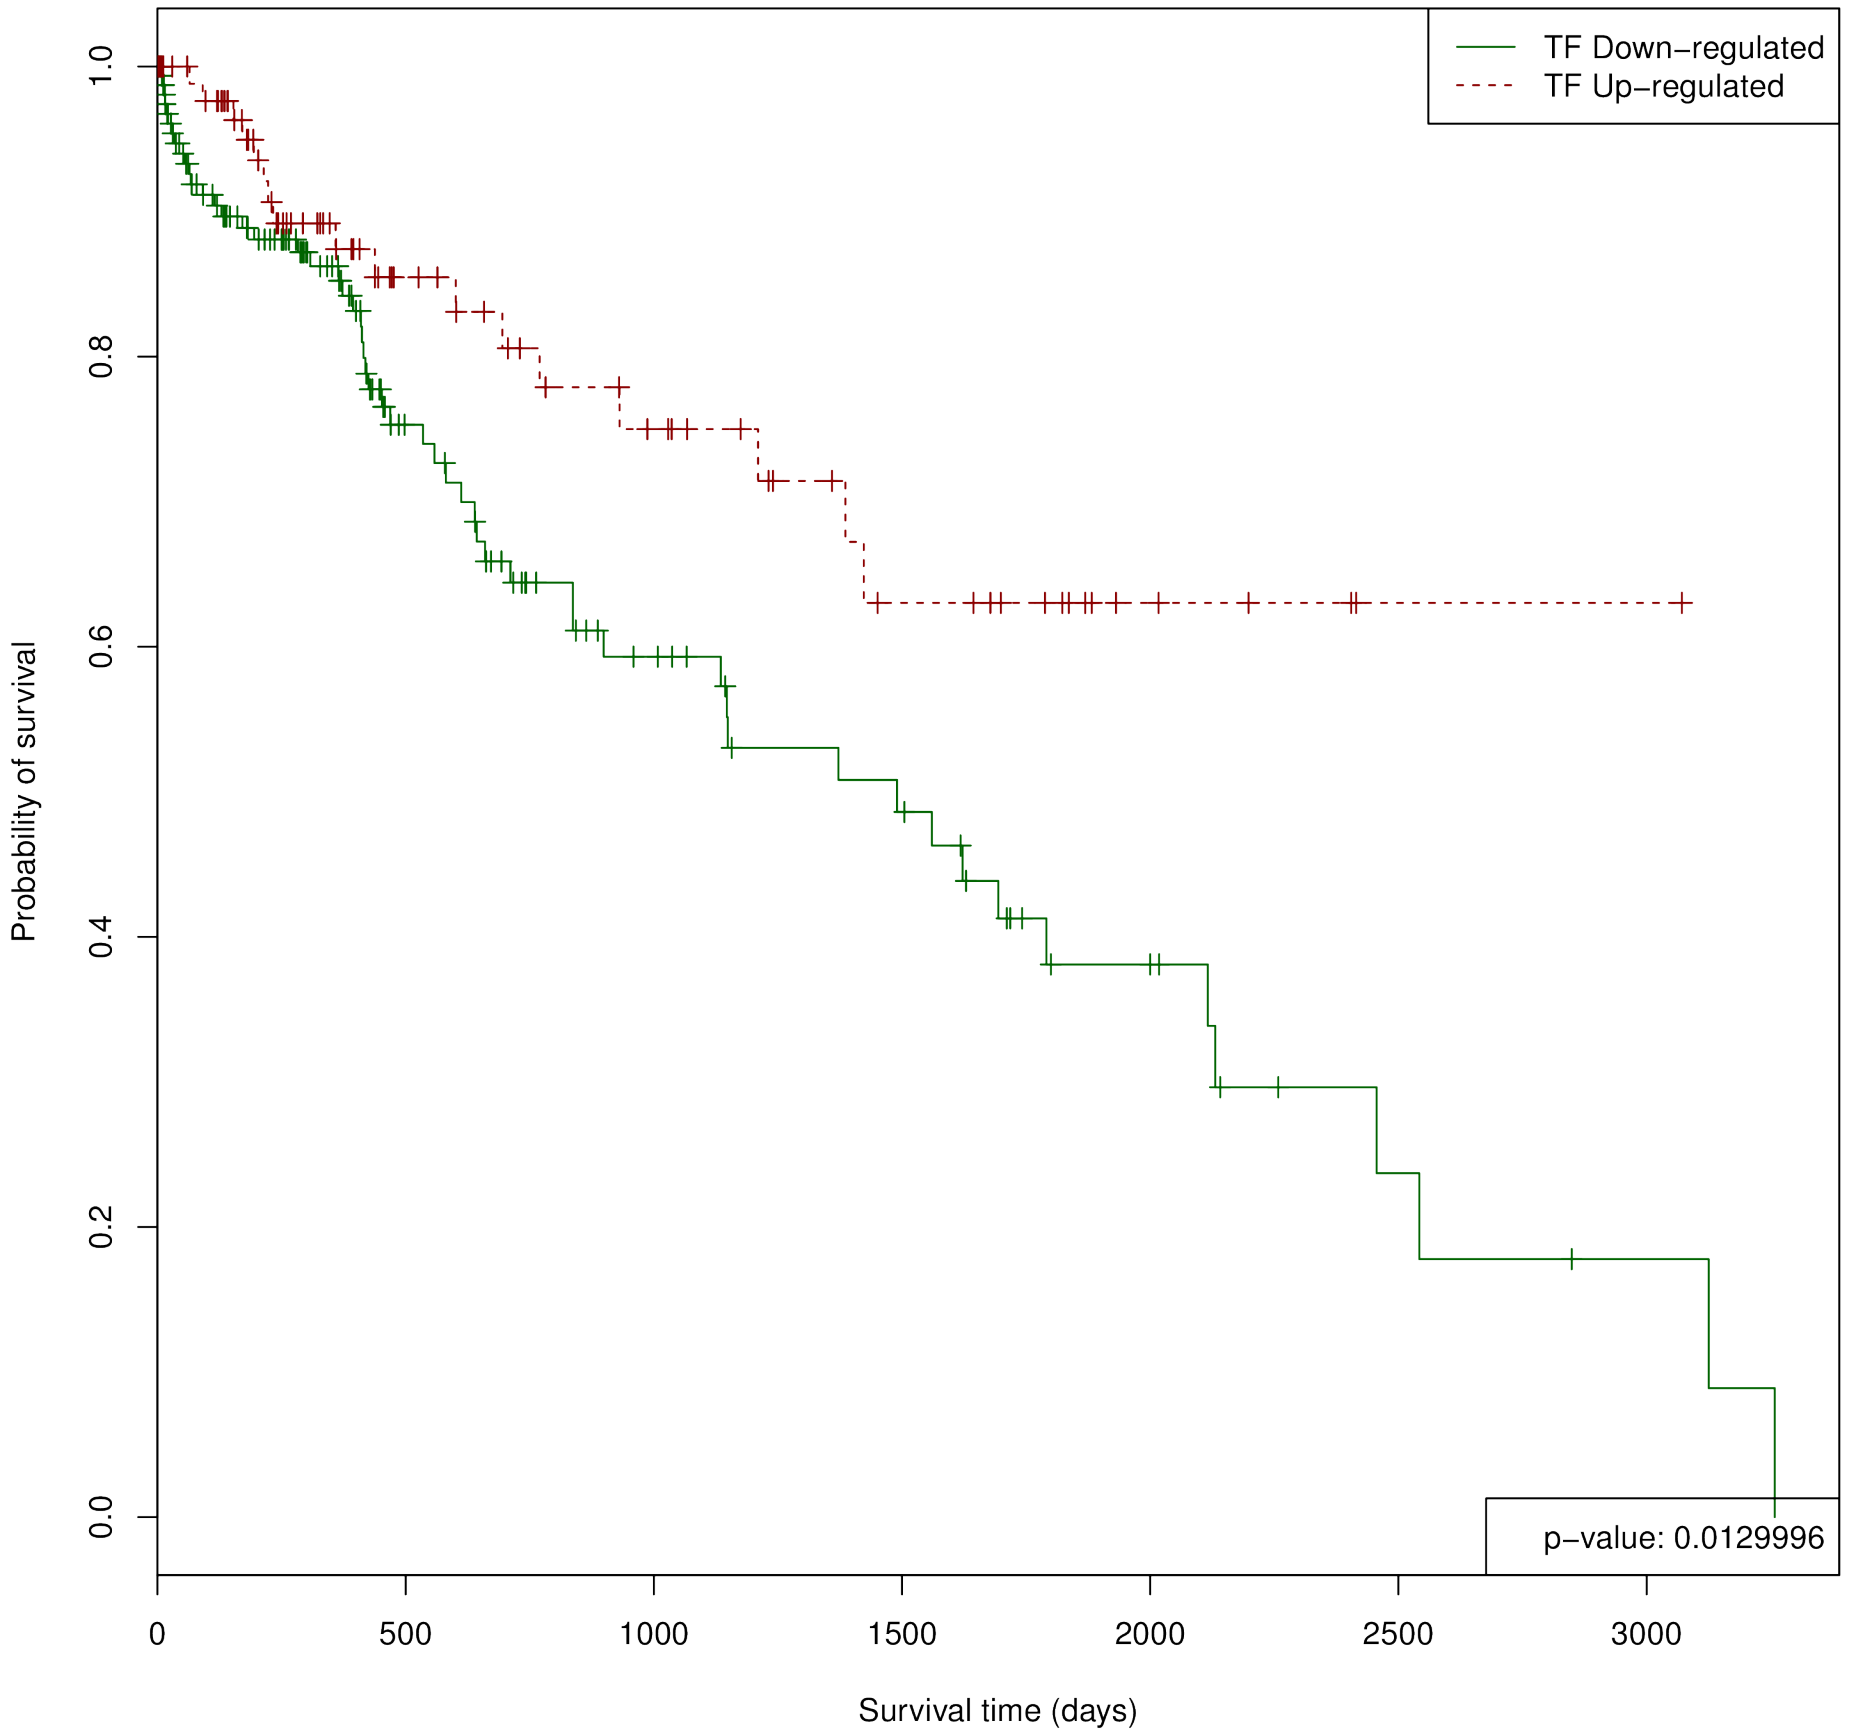

# ELF1 in HNSC

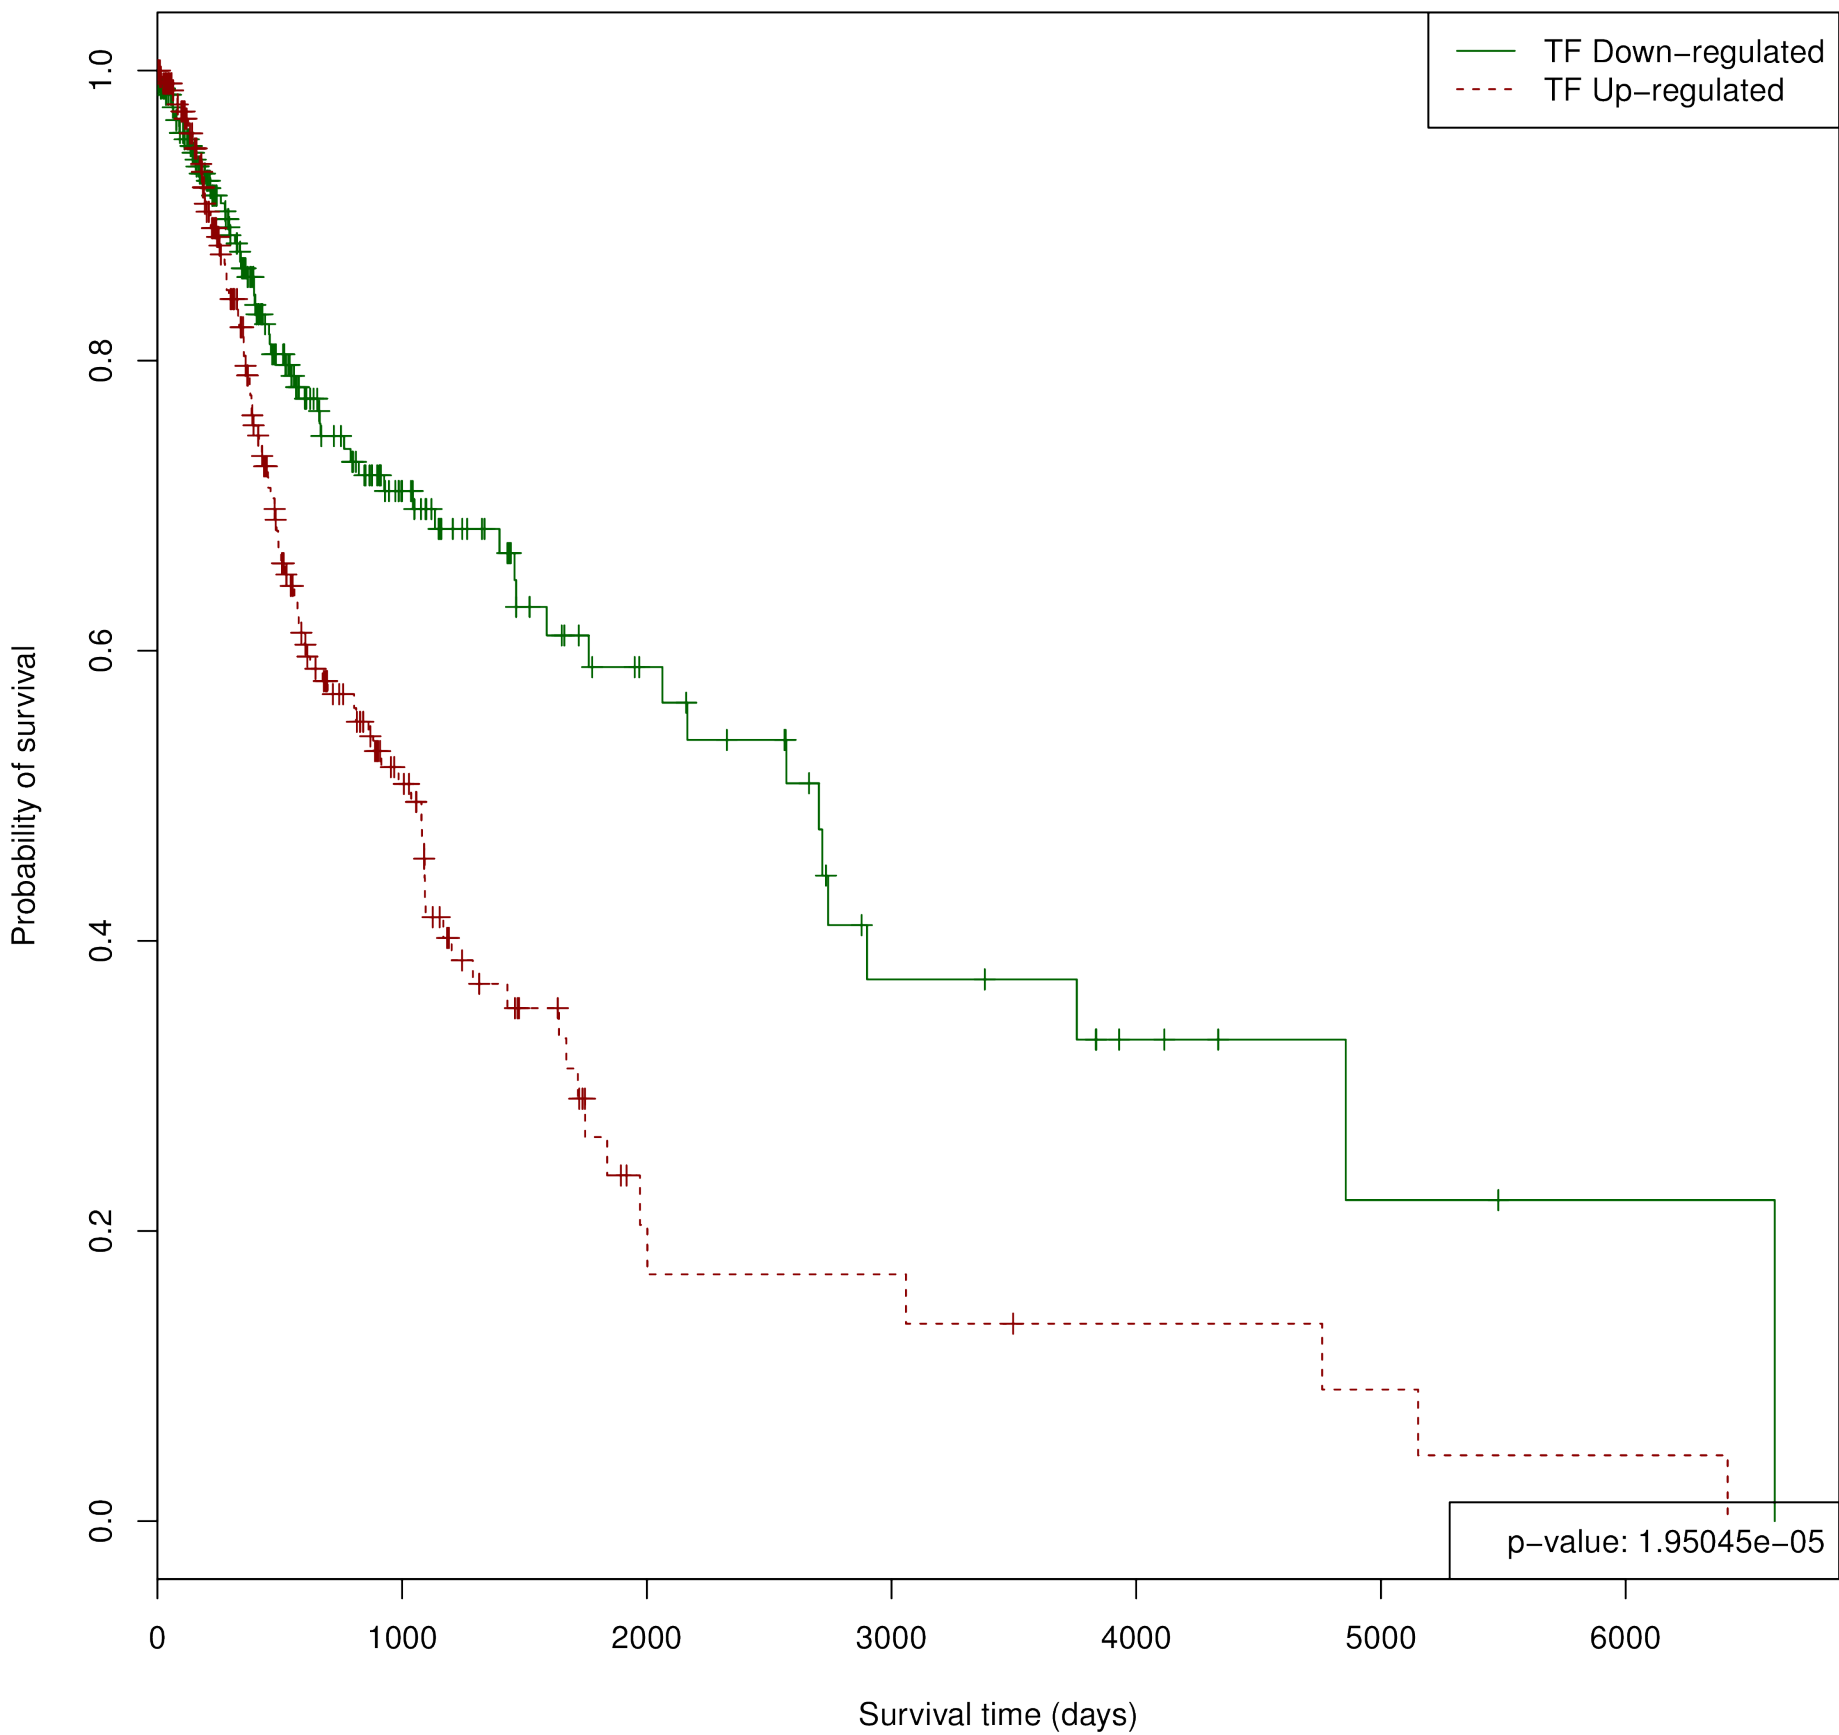



# ELF1 in KIRC

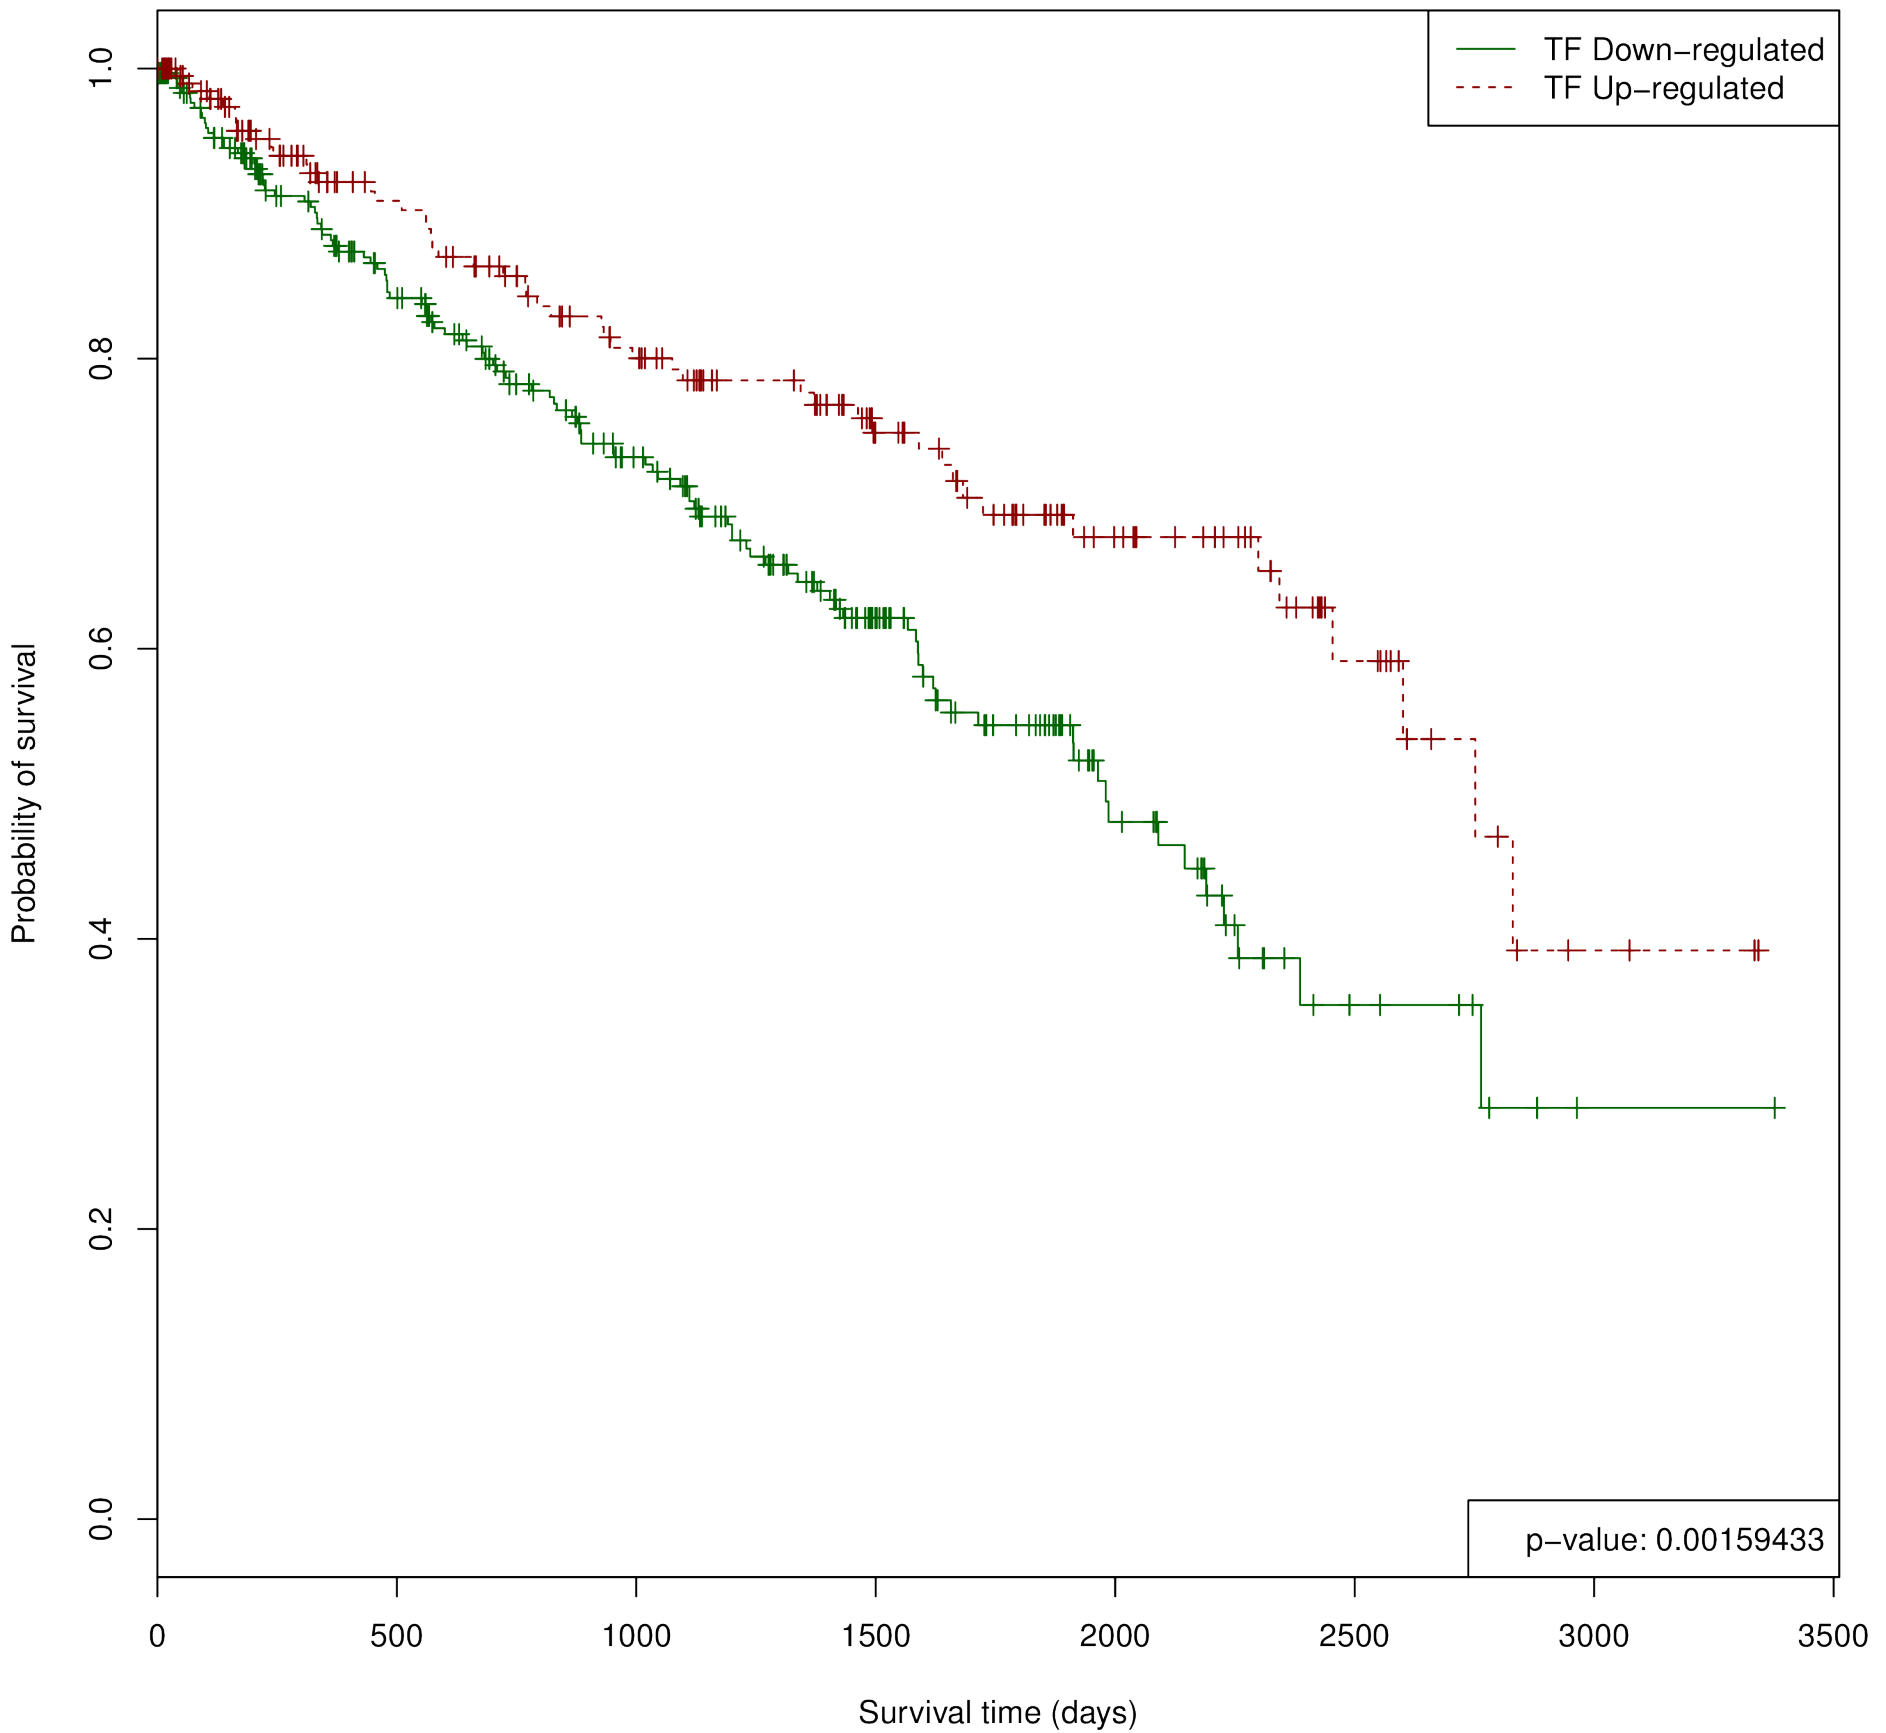

# ELF1 in LUSC

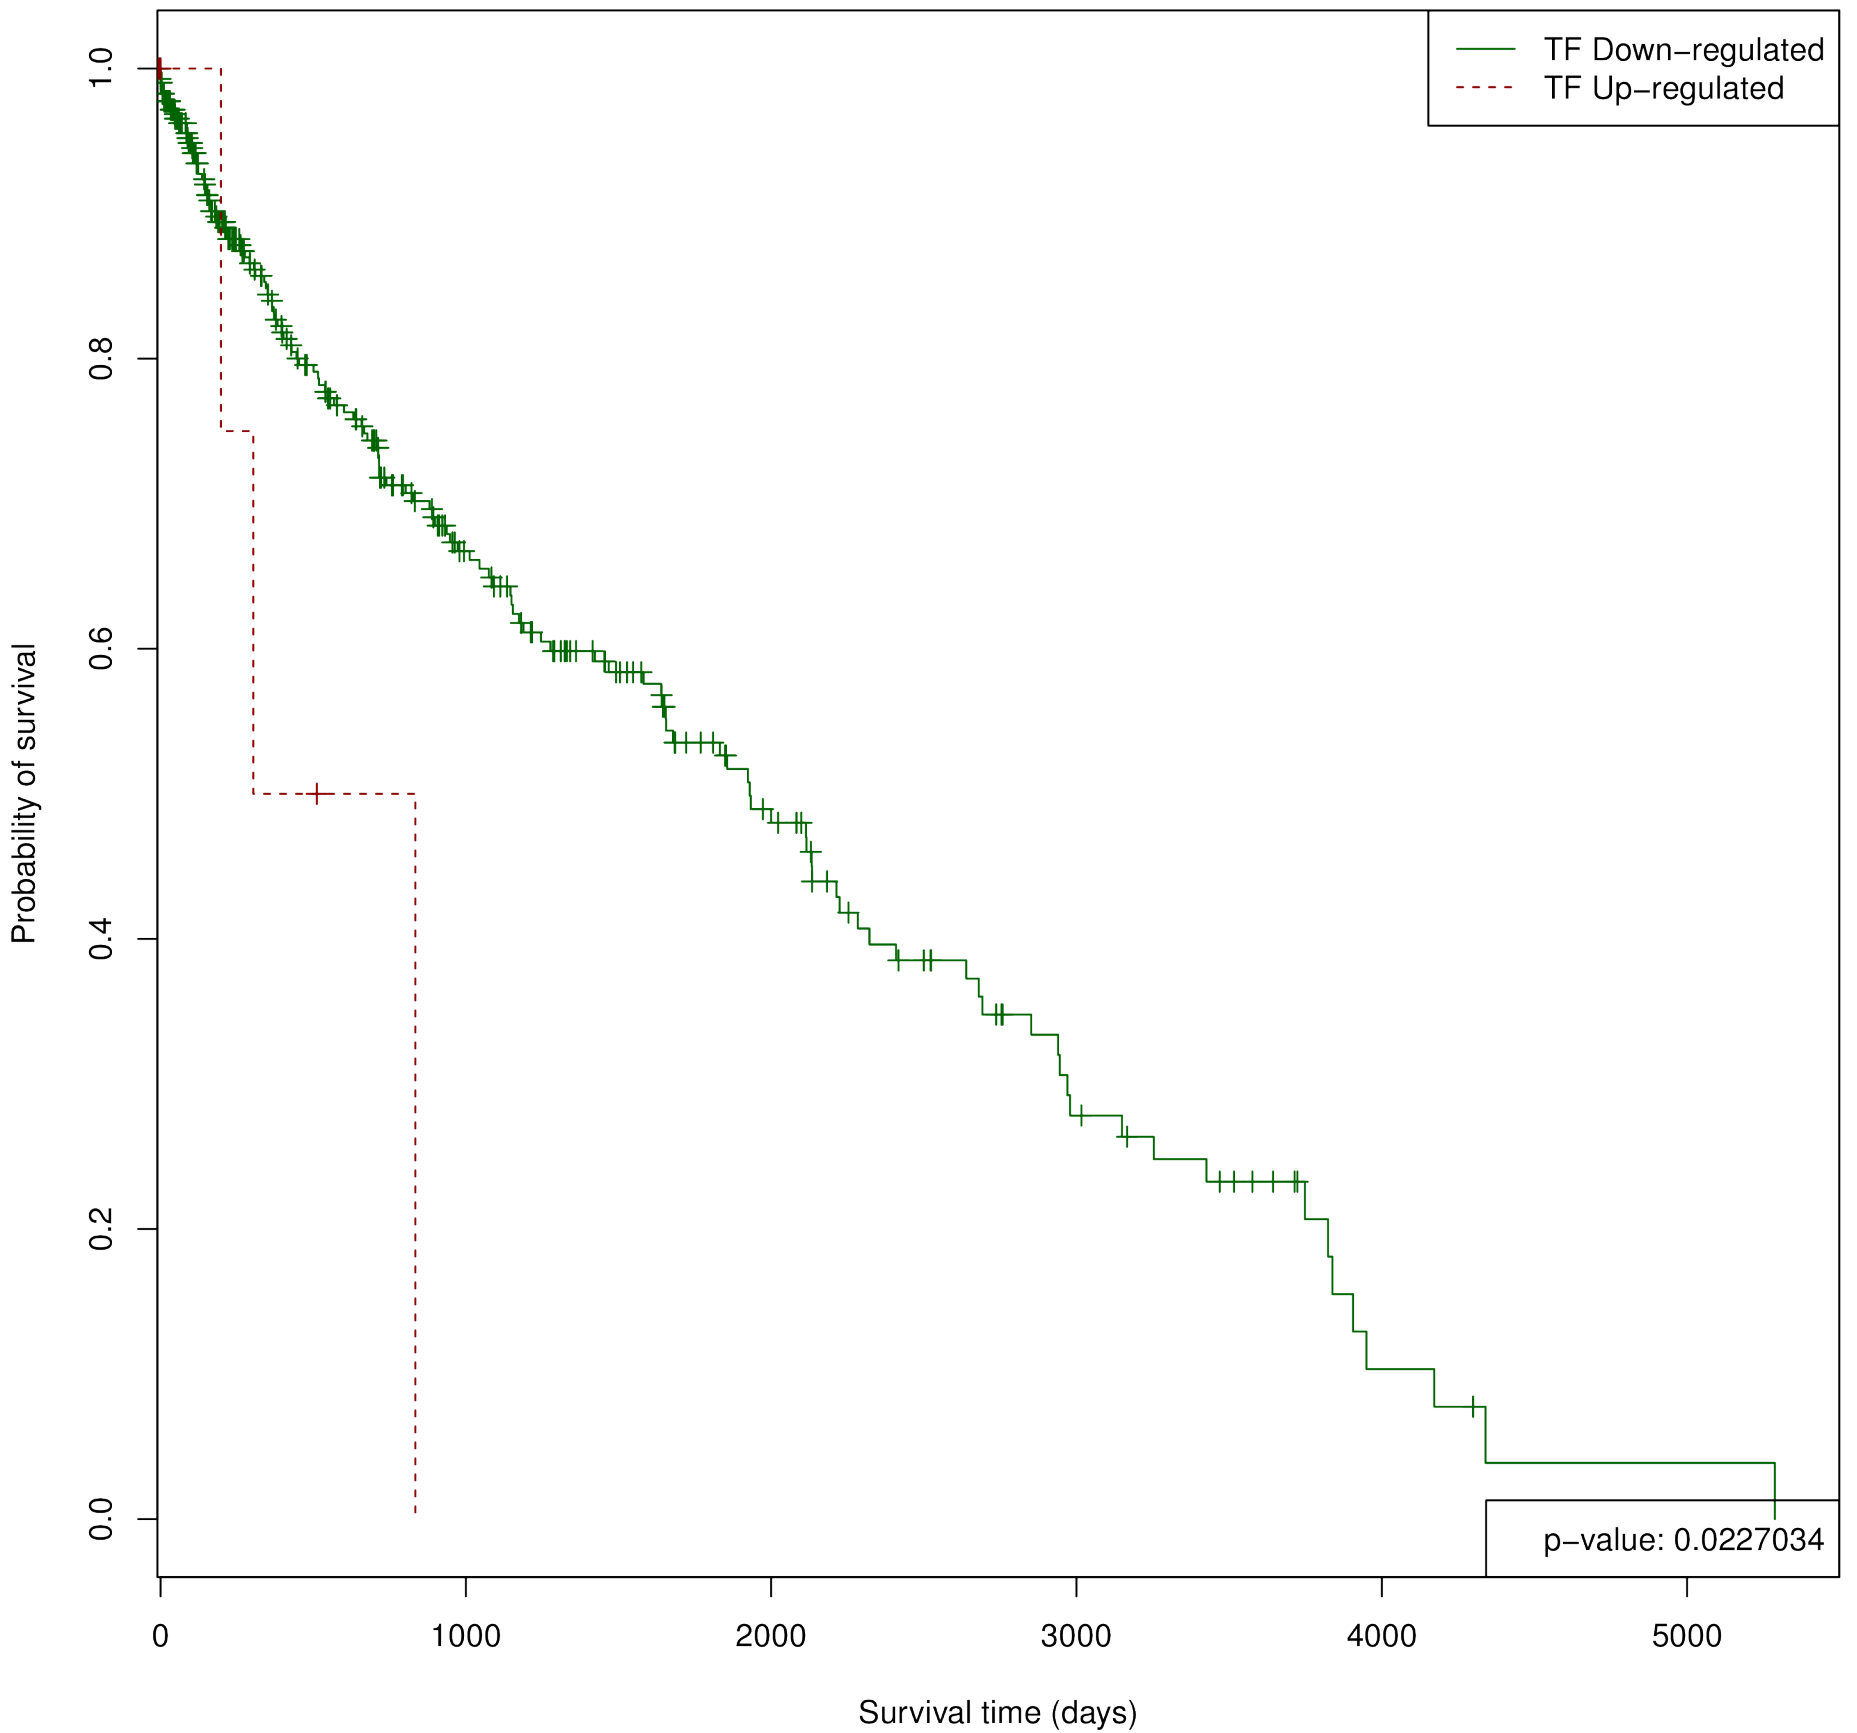

# ELF1 in UCEC

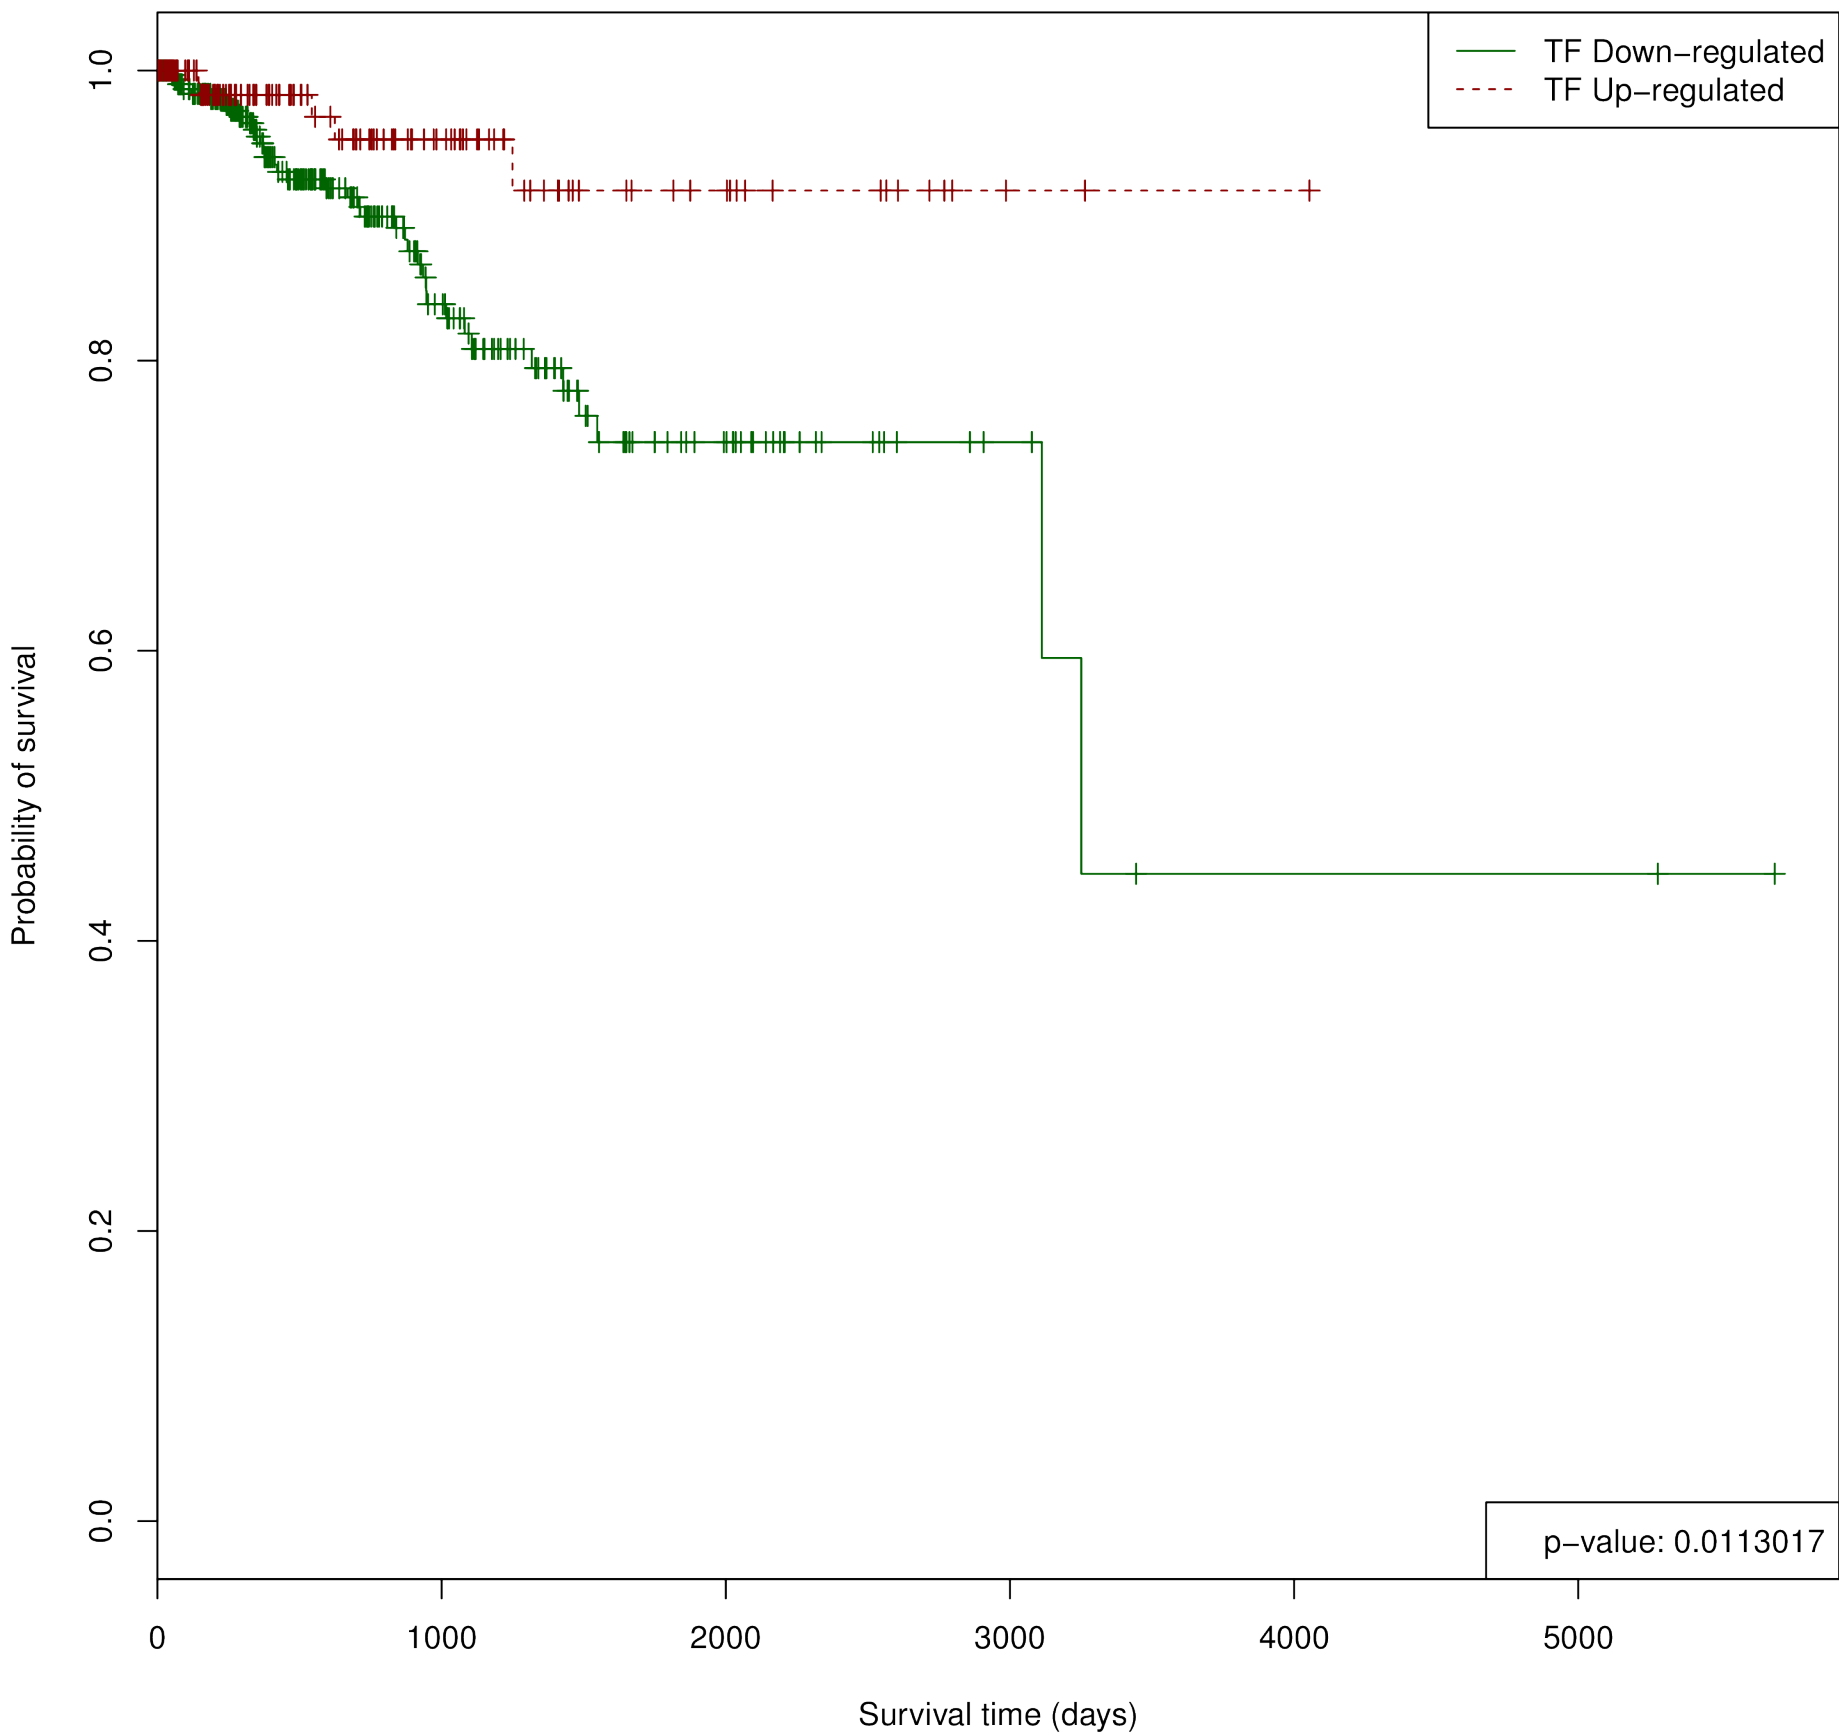

# ETS1 in HNSC

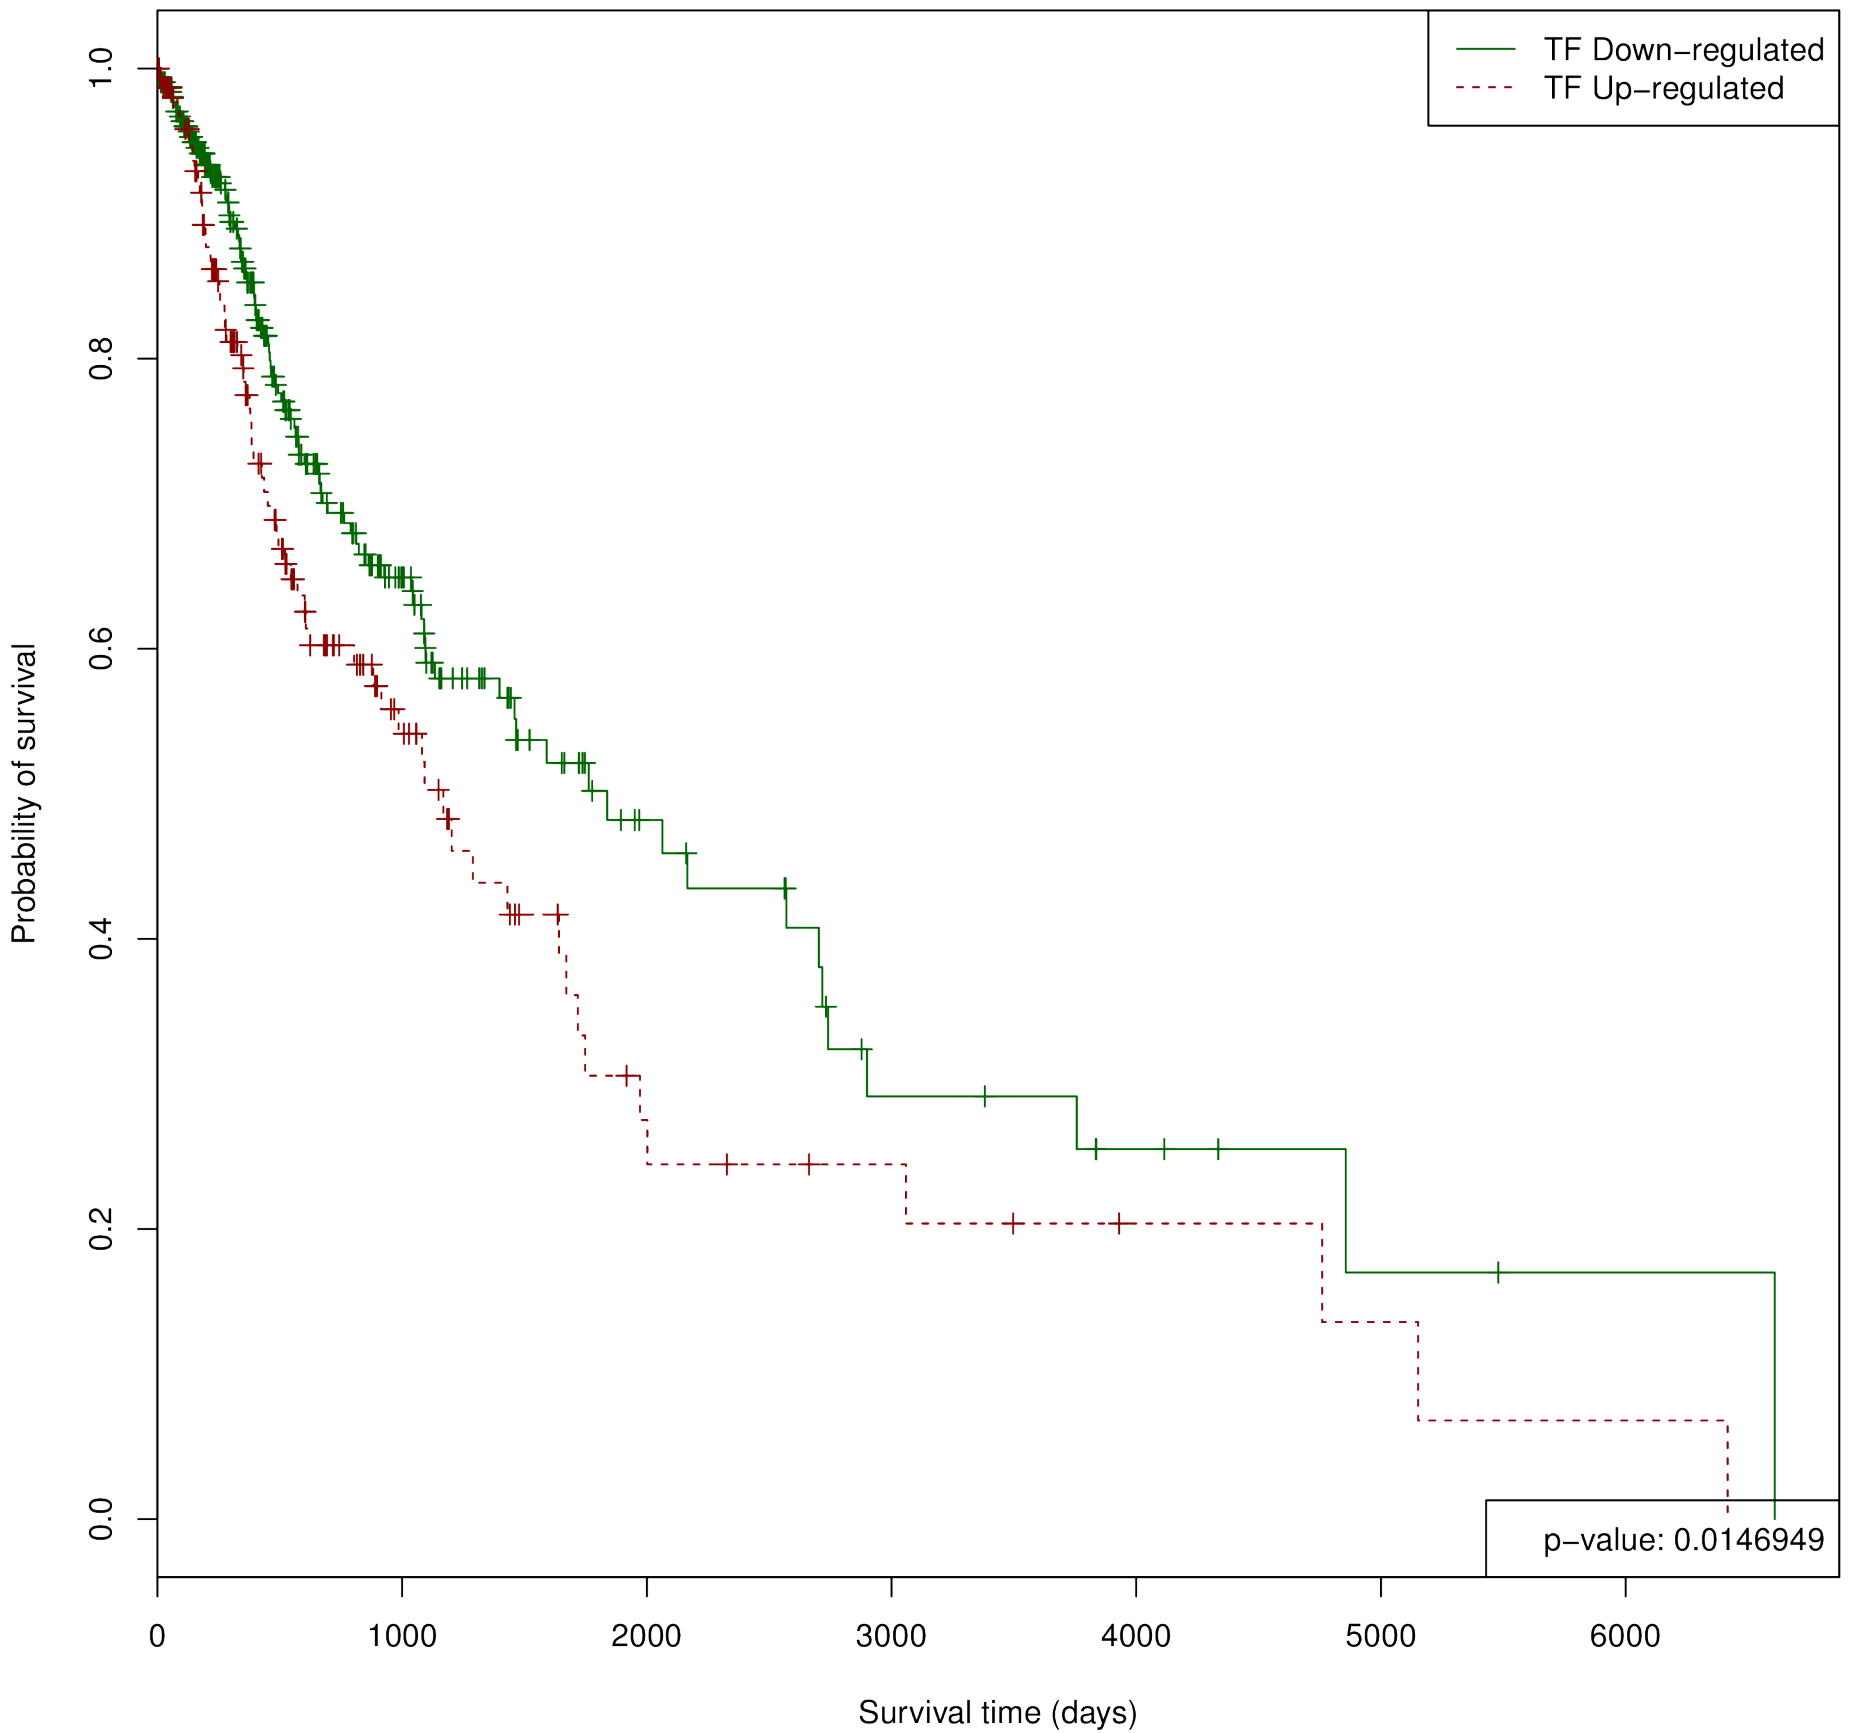

# ETS1 in KIRC

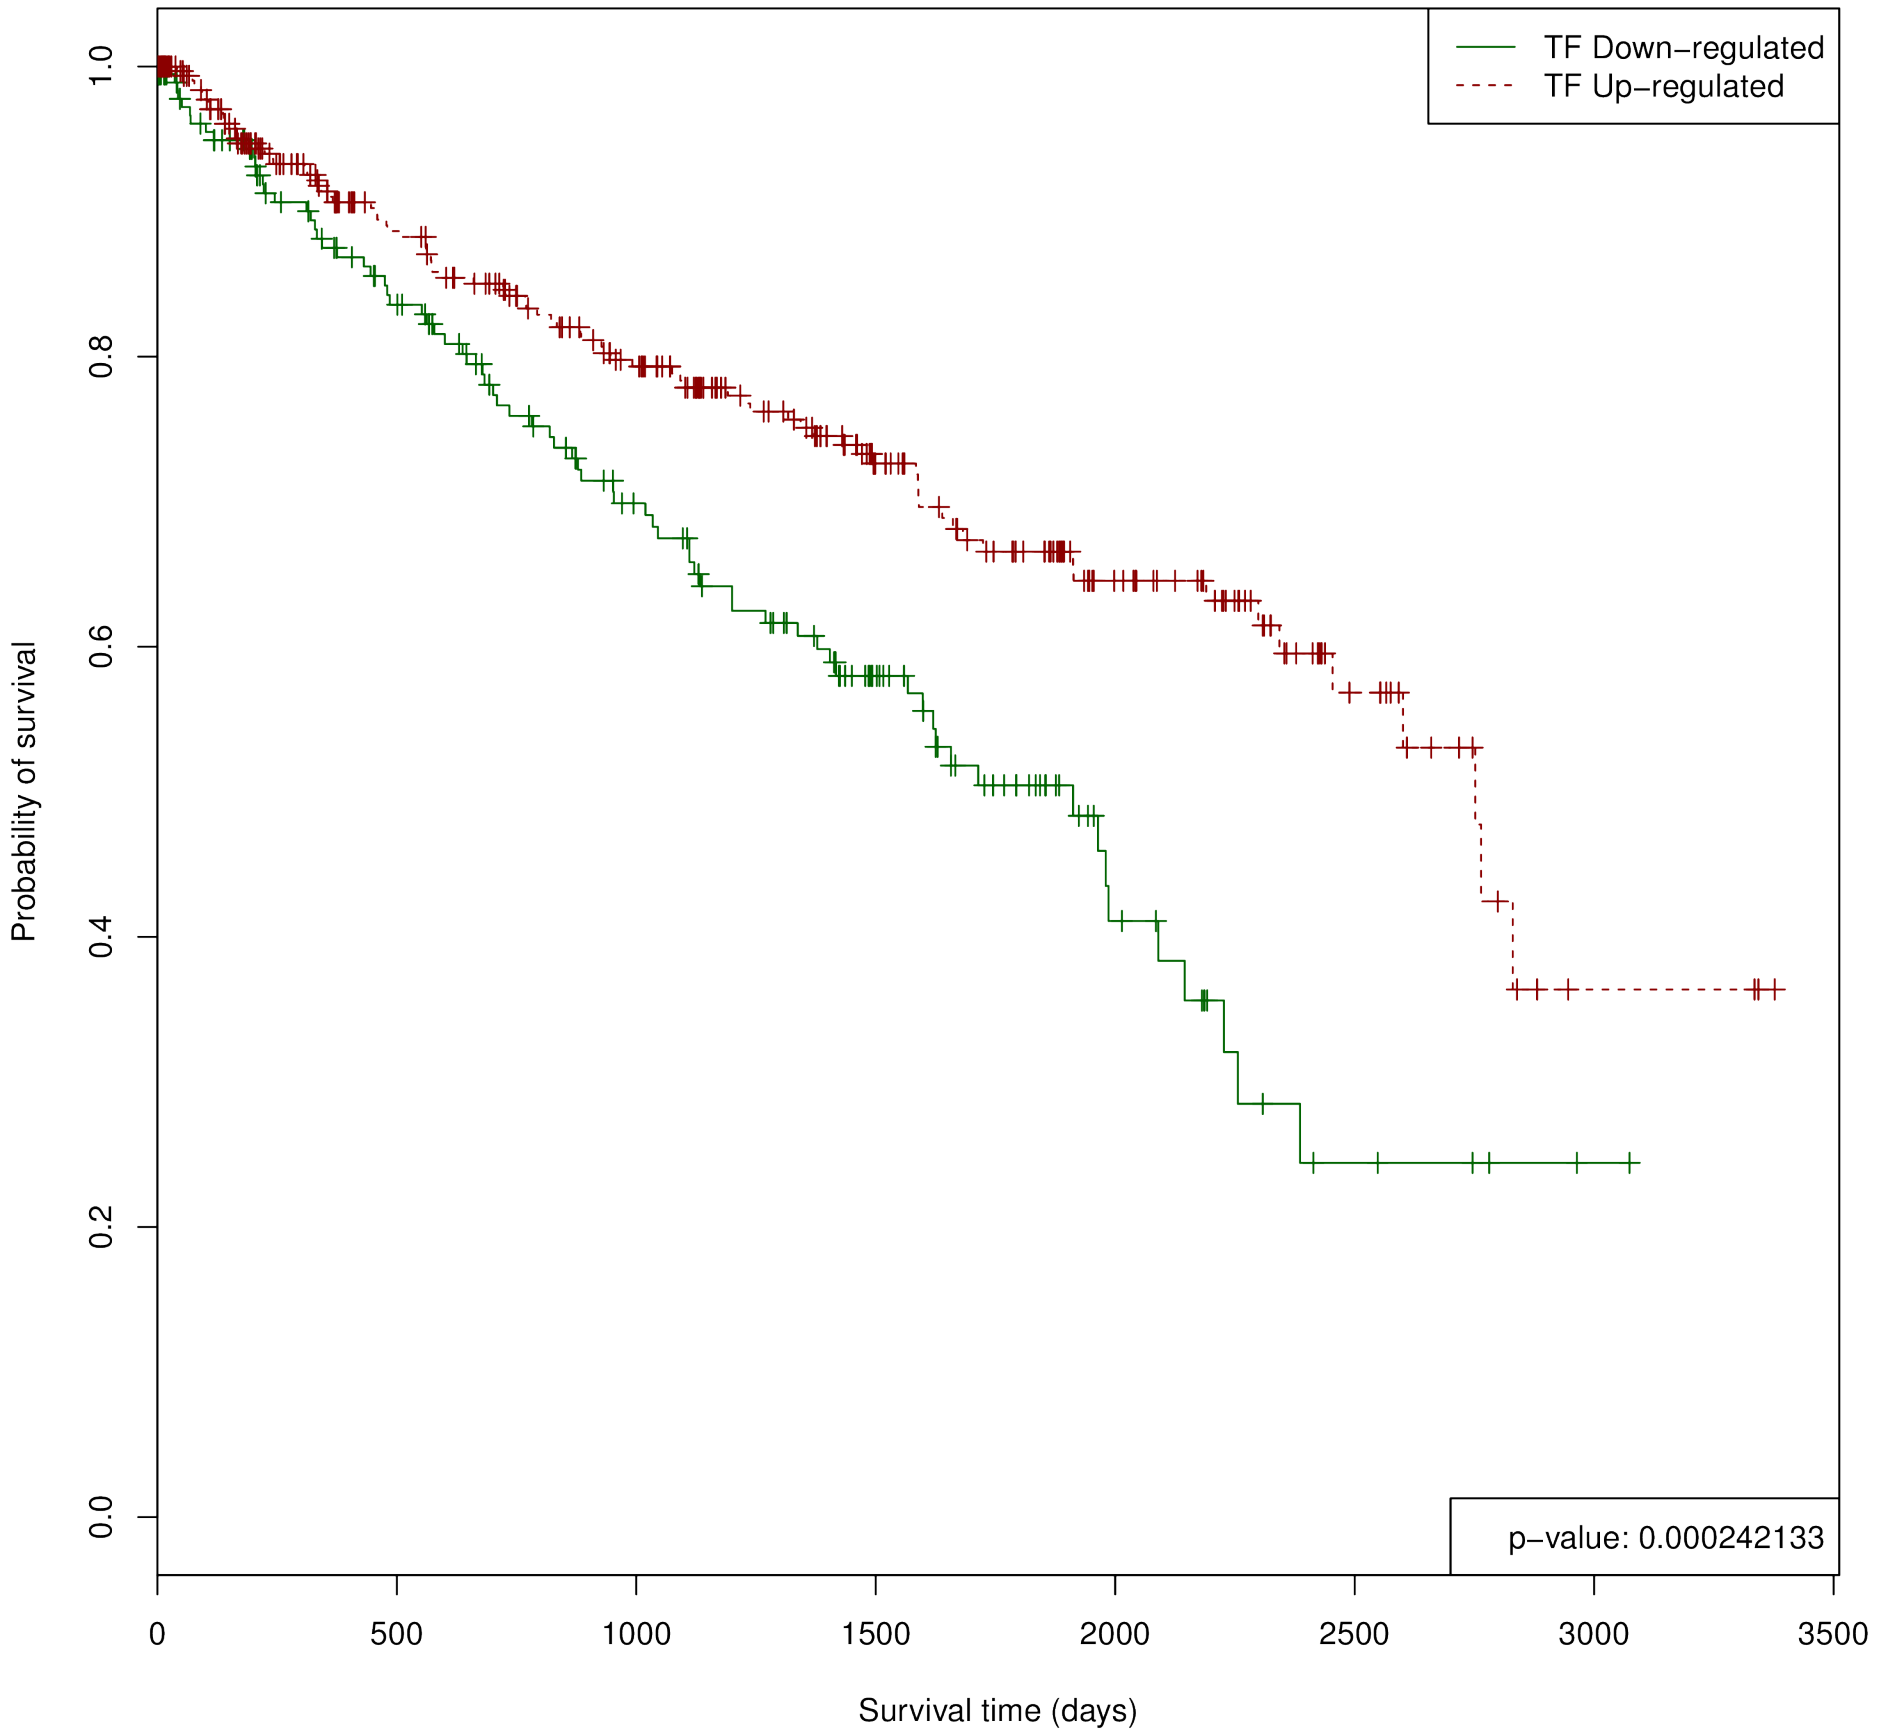

# FOS in HNSC

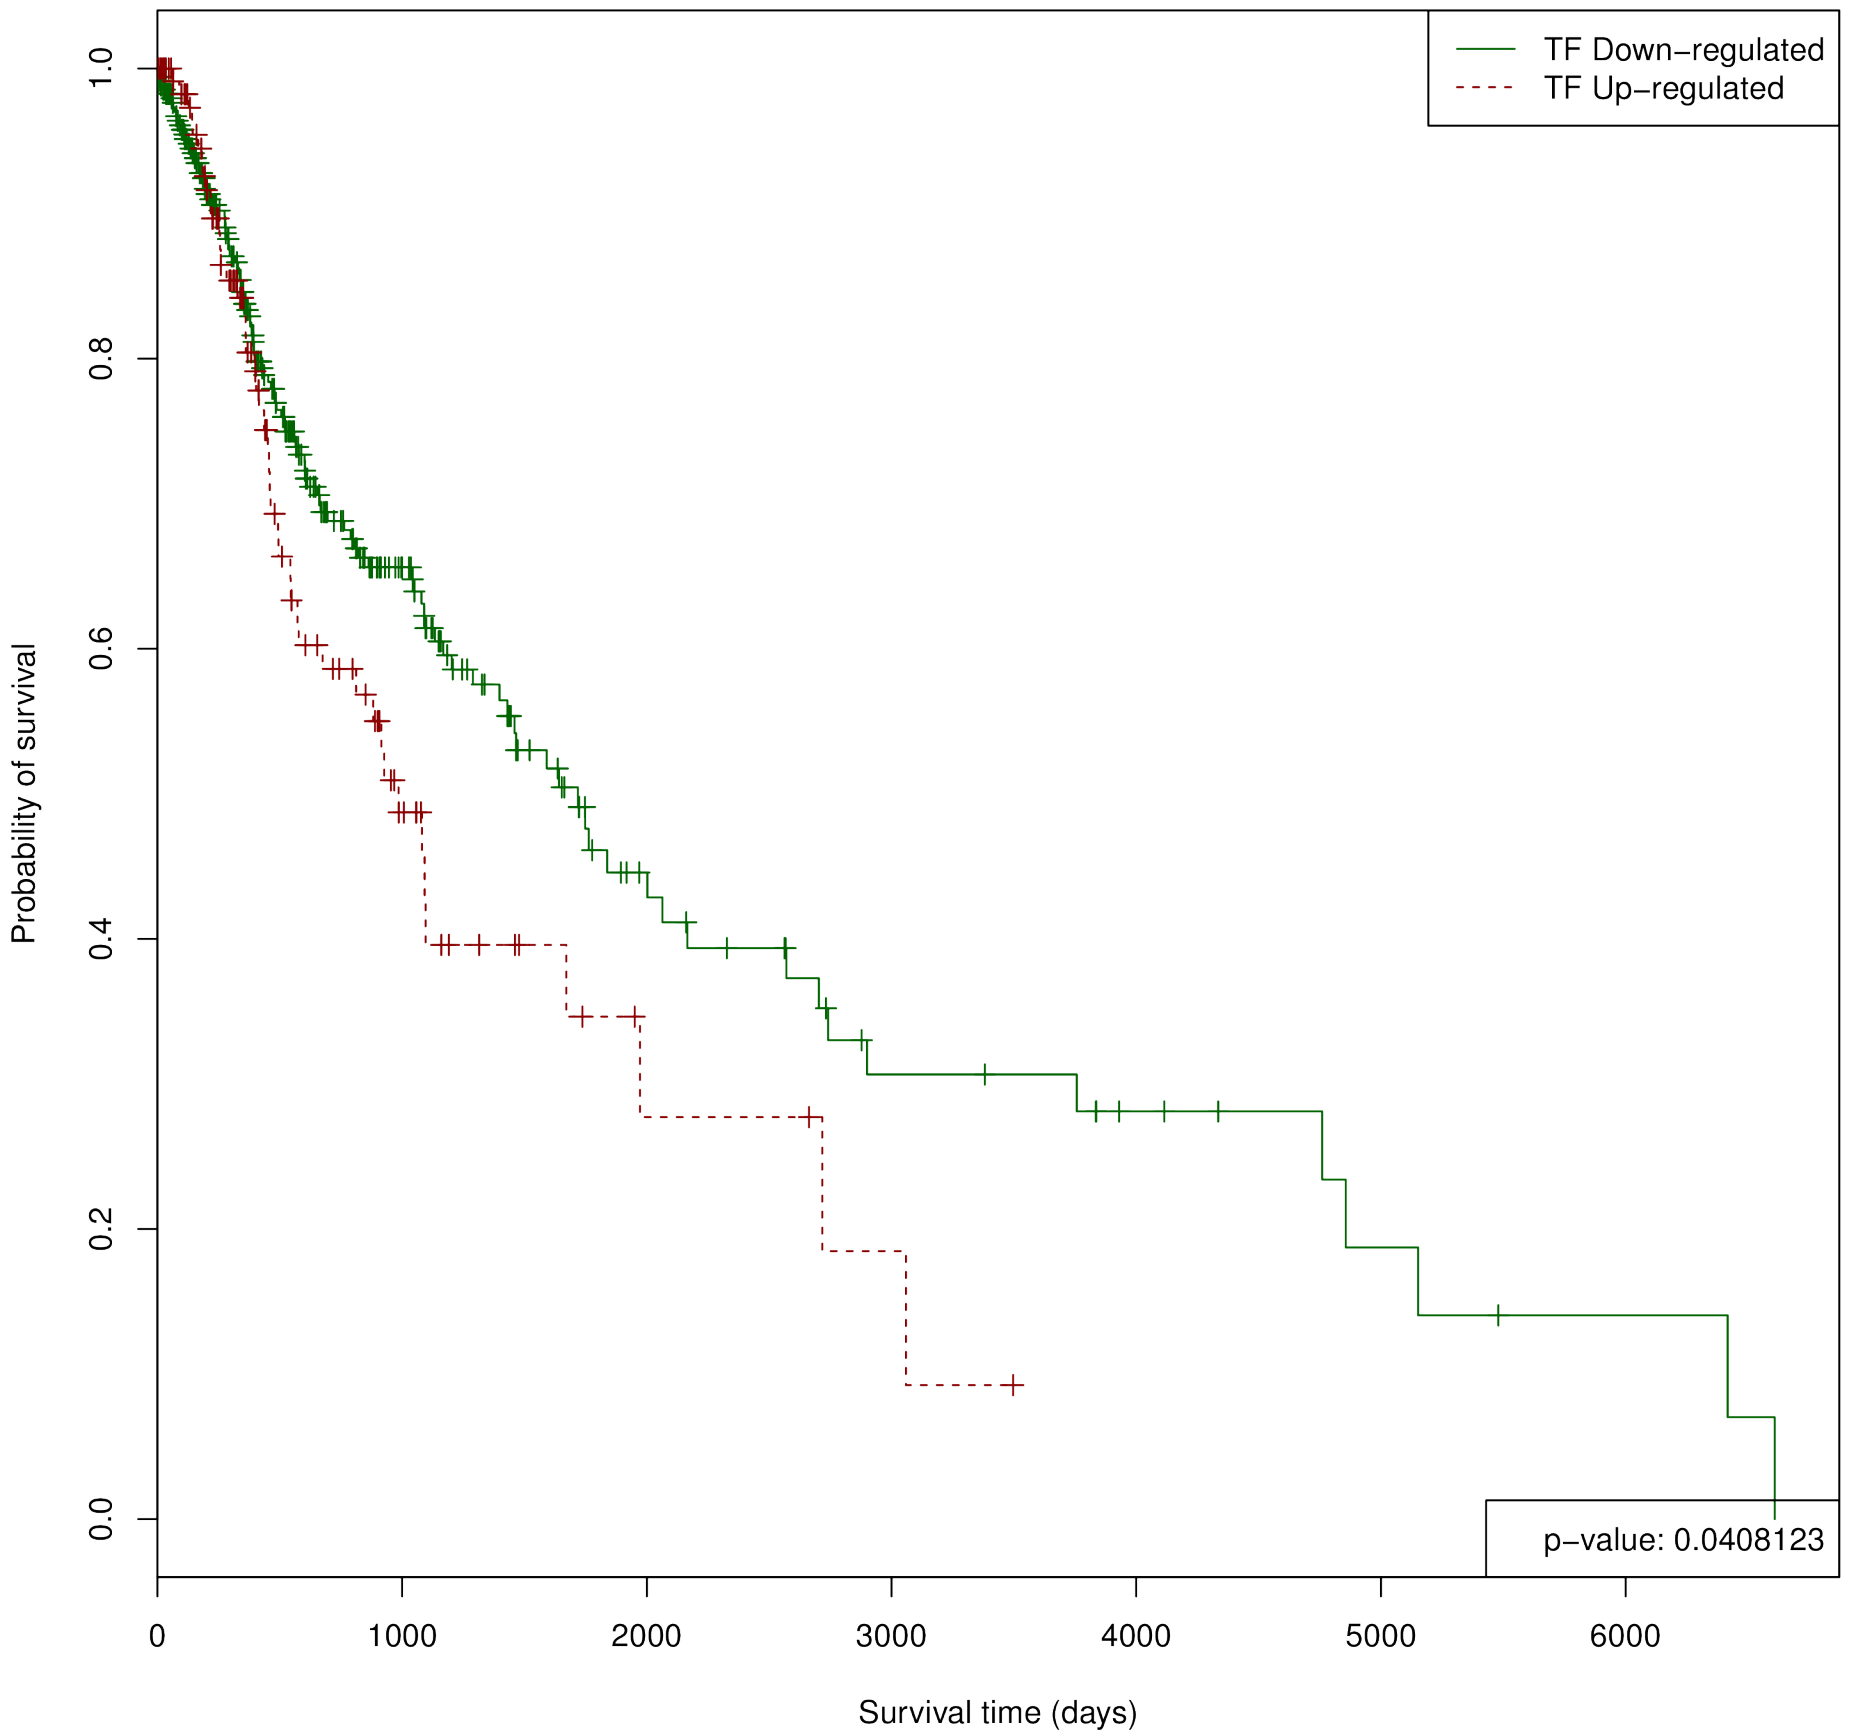

# FOS in KIRC

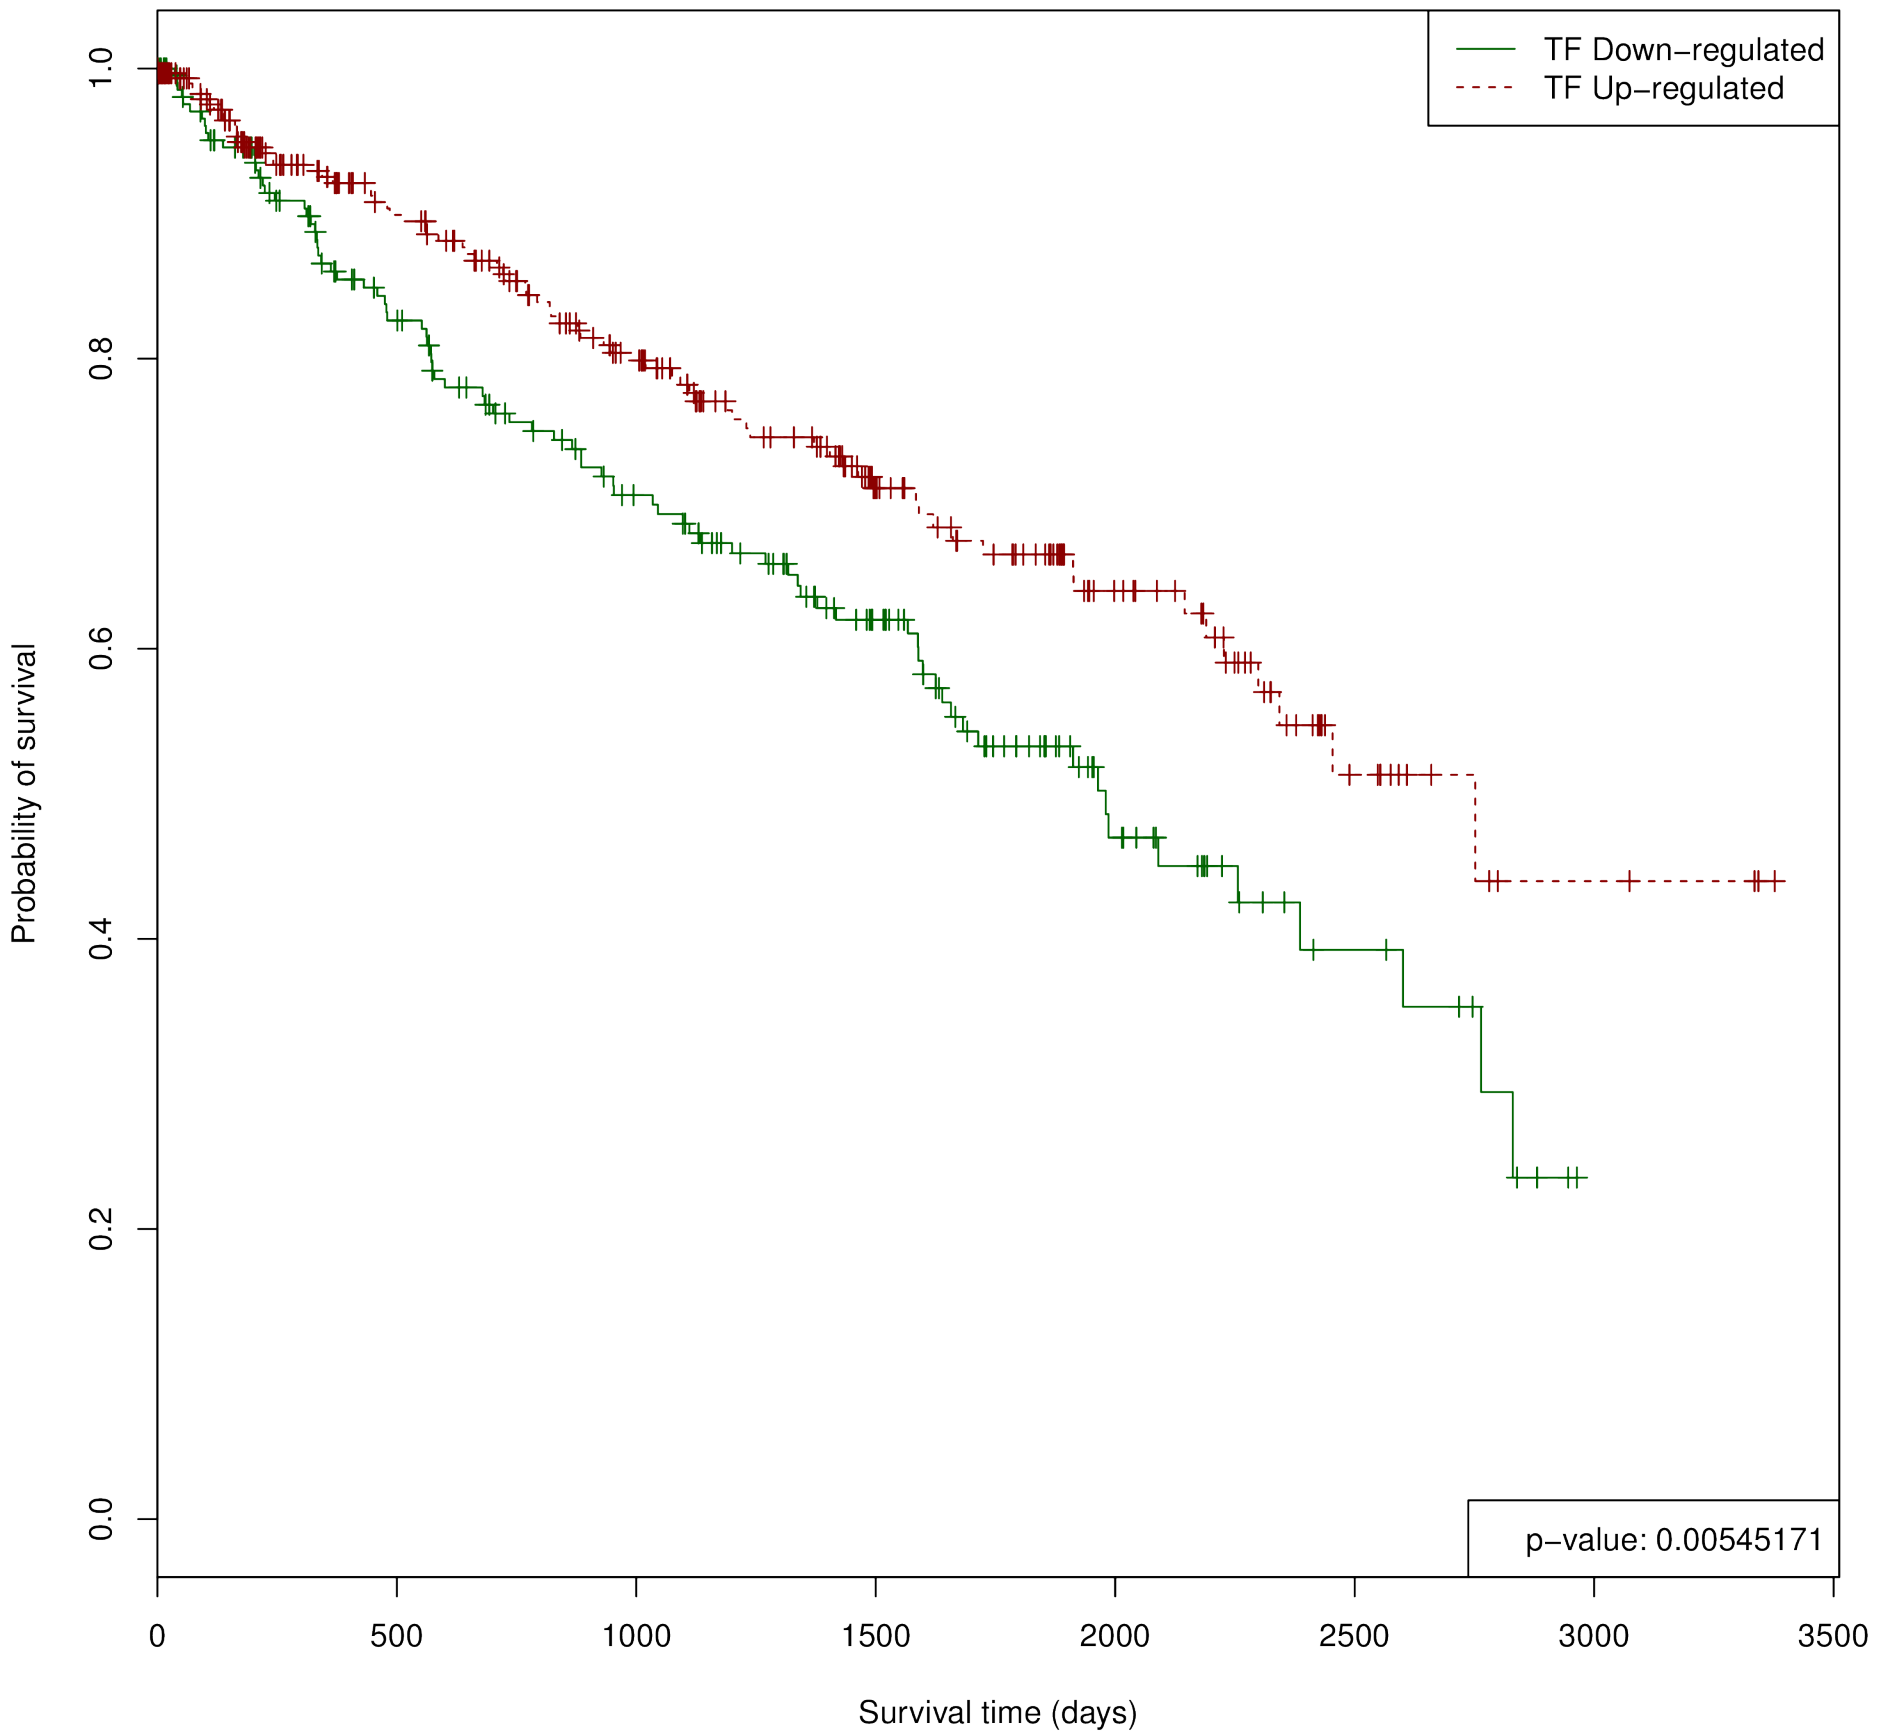

# FOSL1 in BRCA

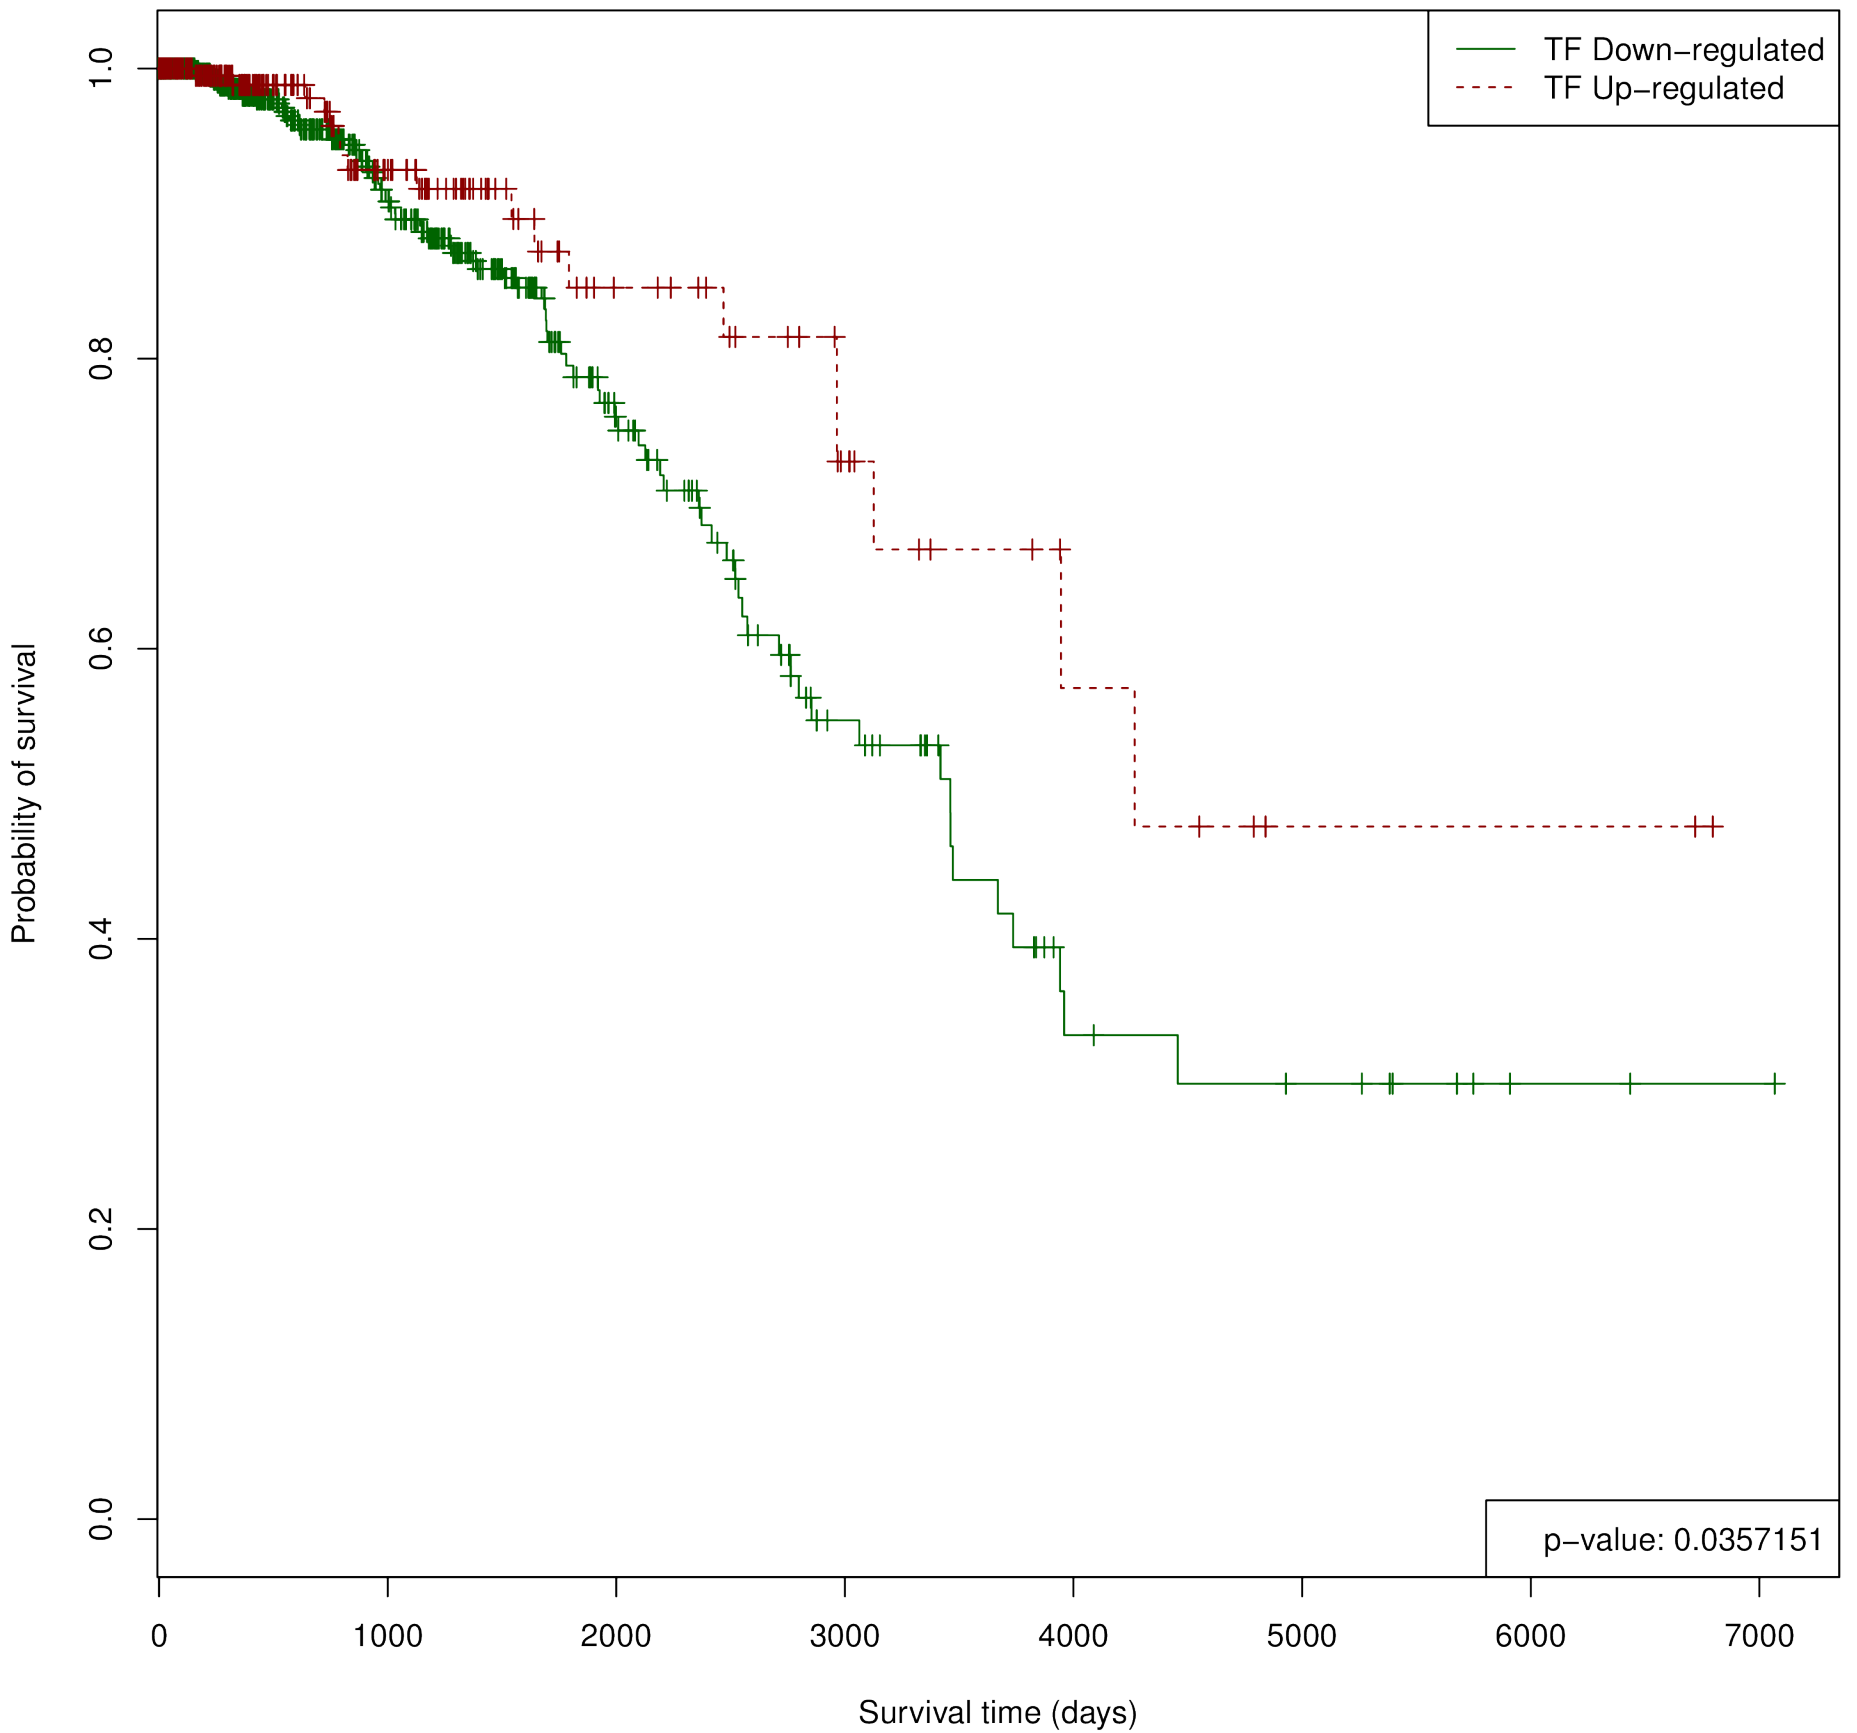



# FOSL1 in HNSC

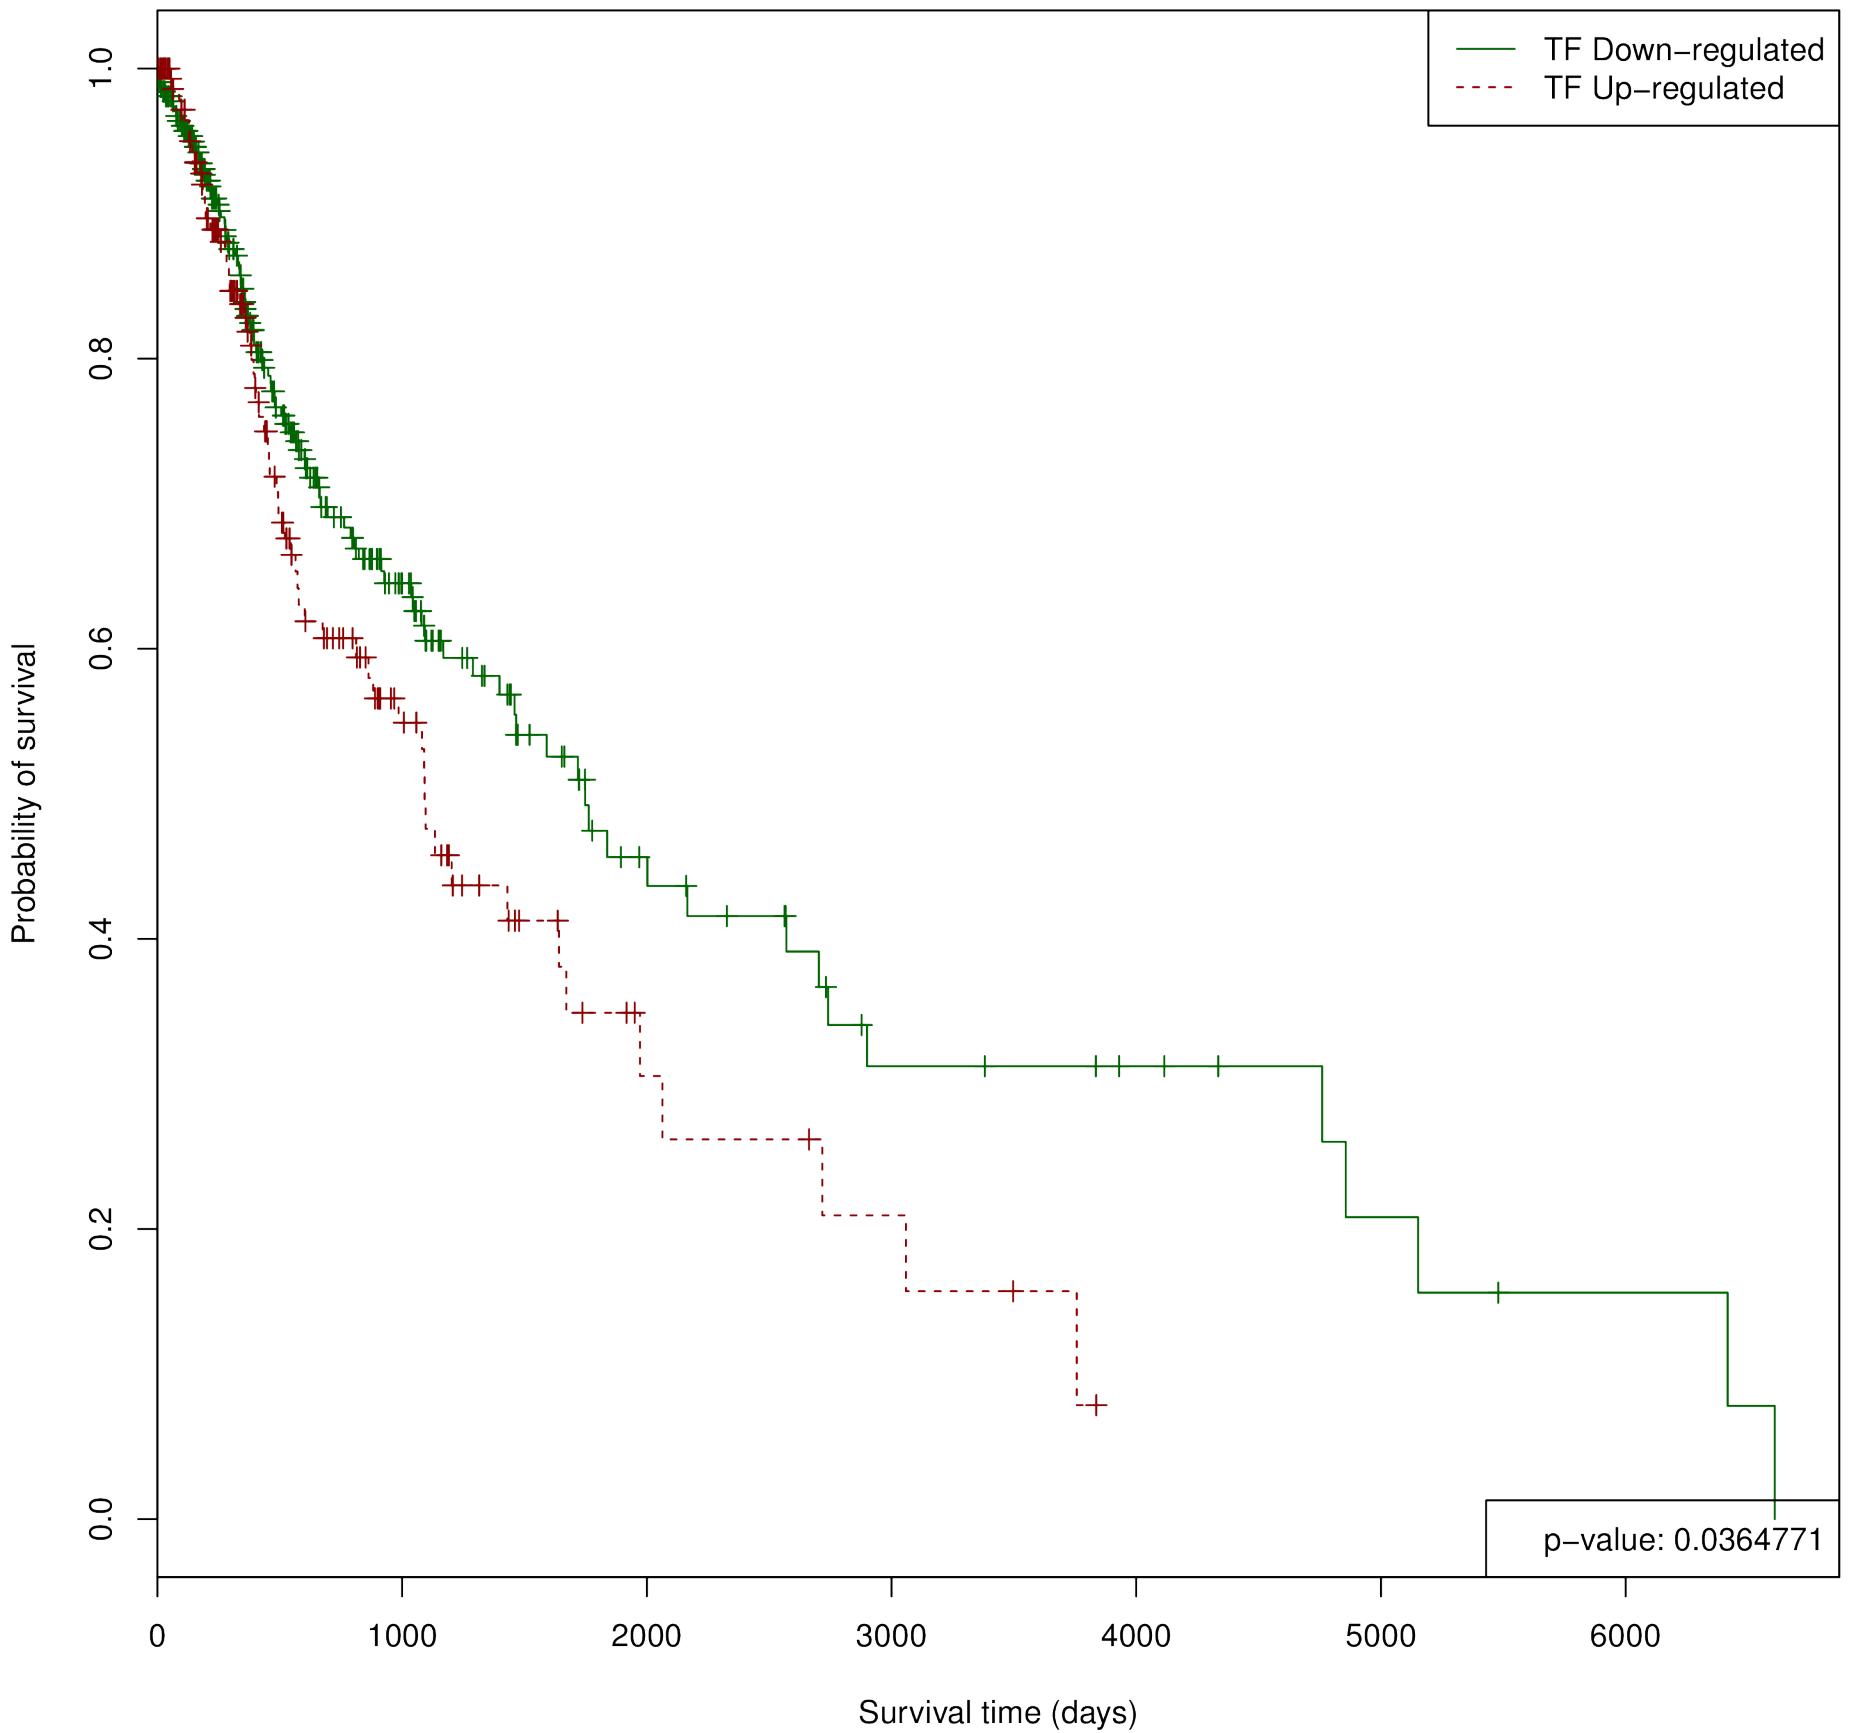

# FOSL1 in KIRC

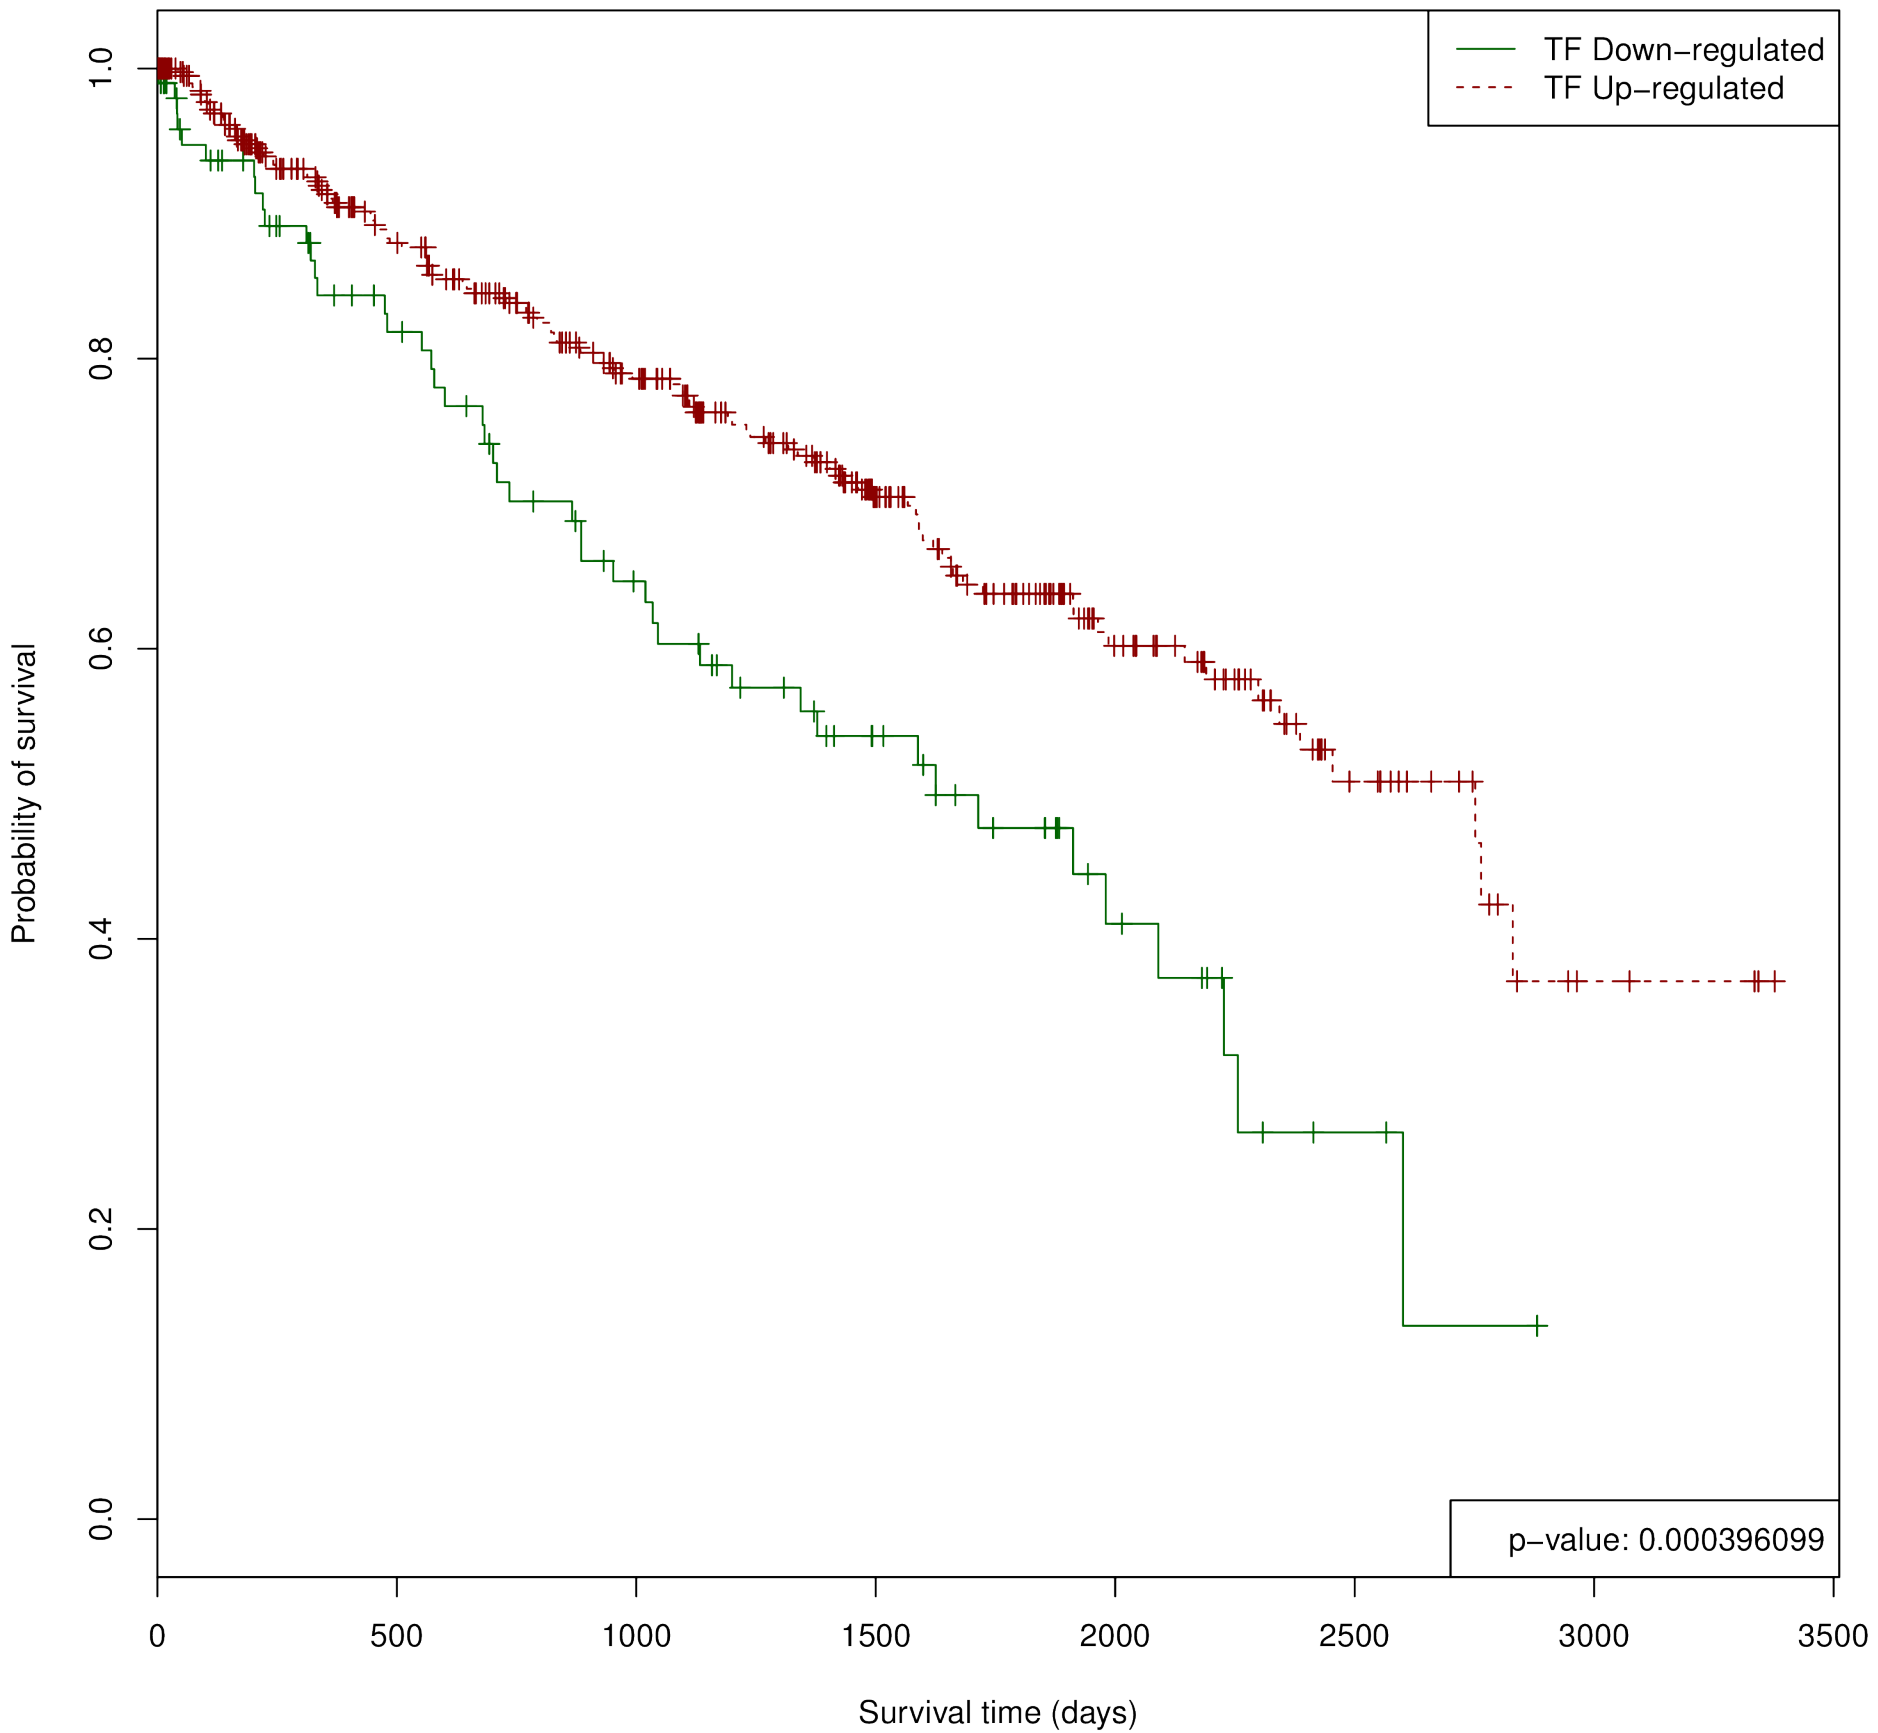

# FOSL2 in HNSC

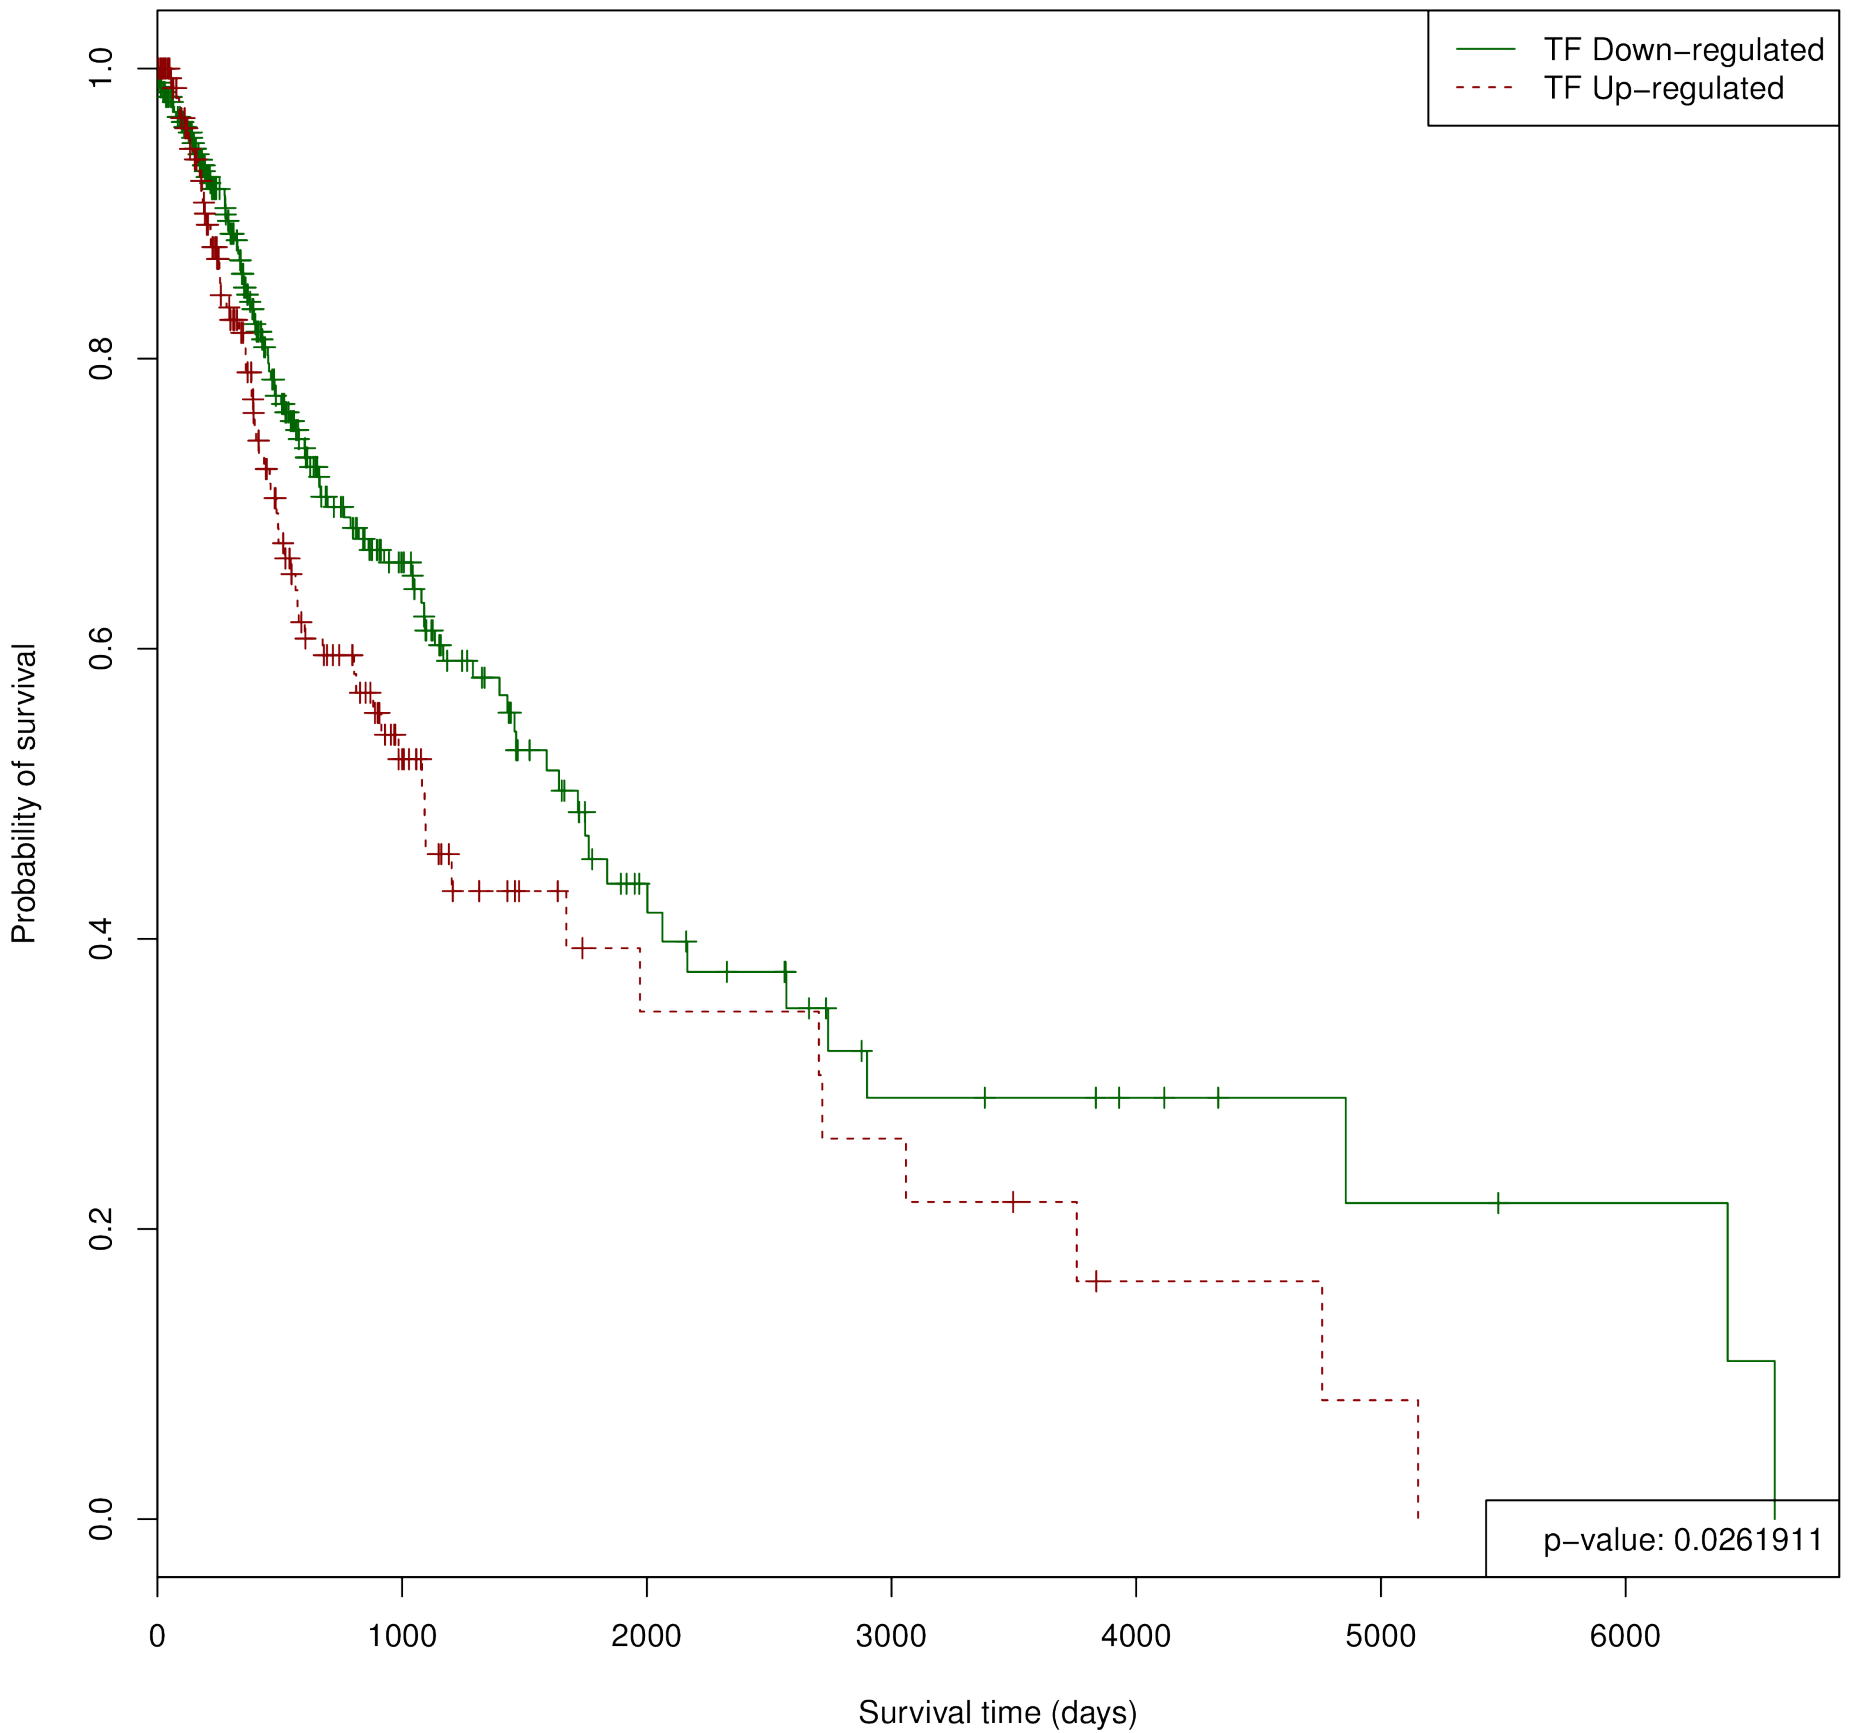

# FOS in LUSC

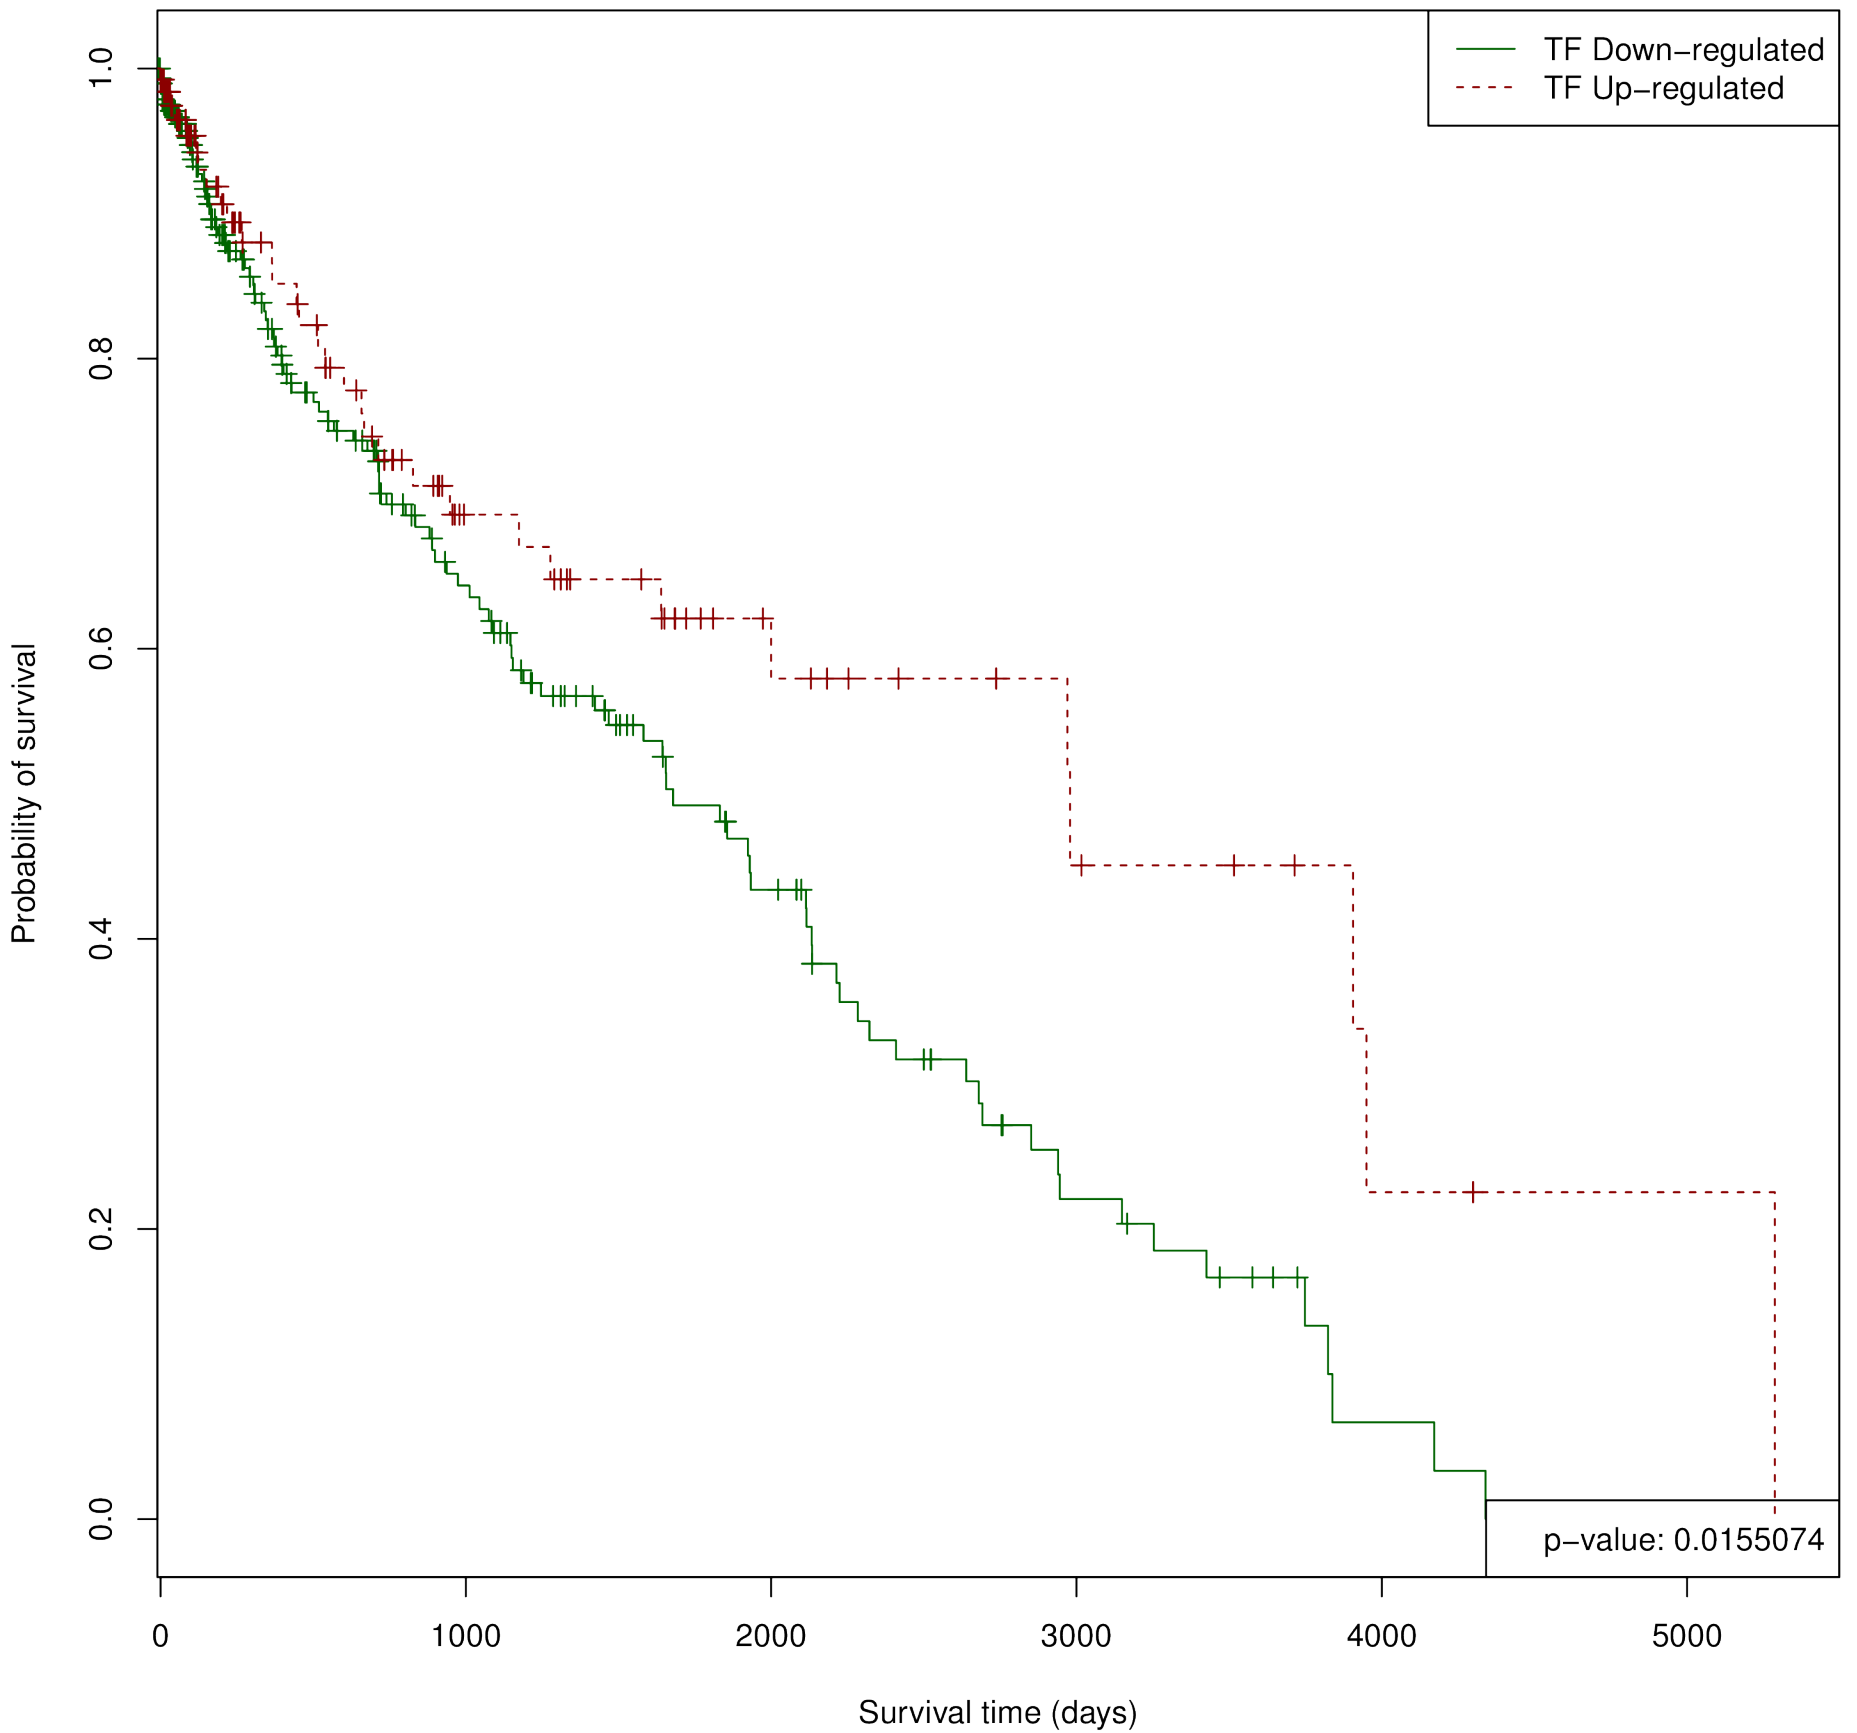

# FOXA1 in COAD

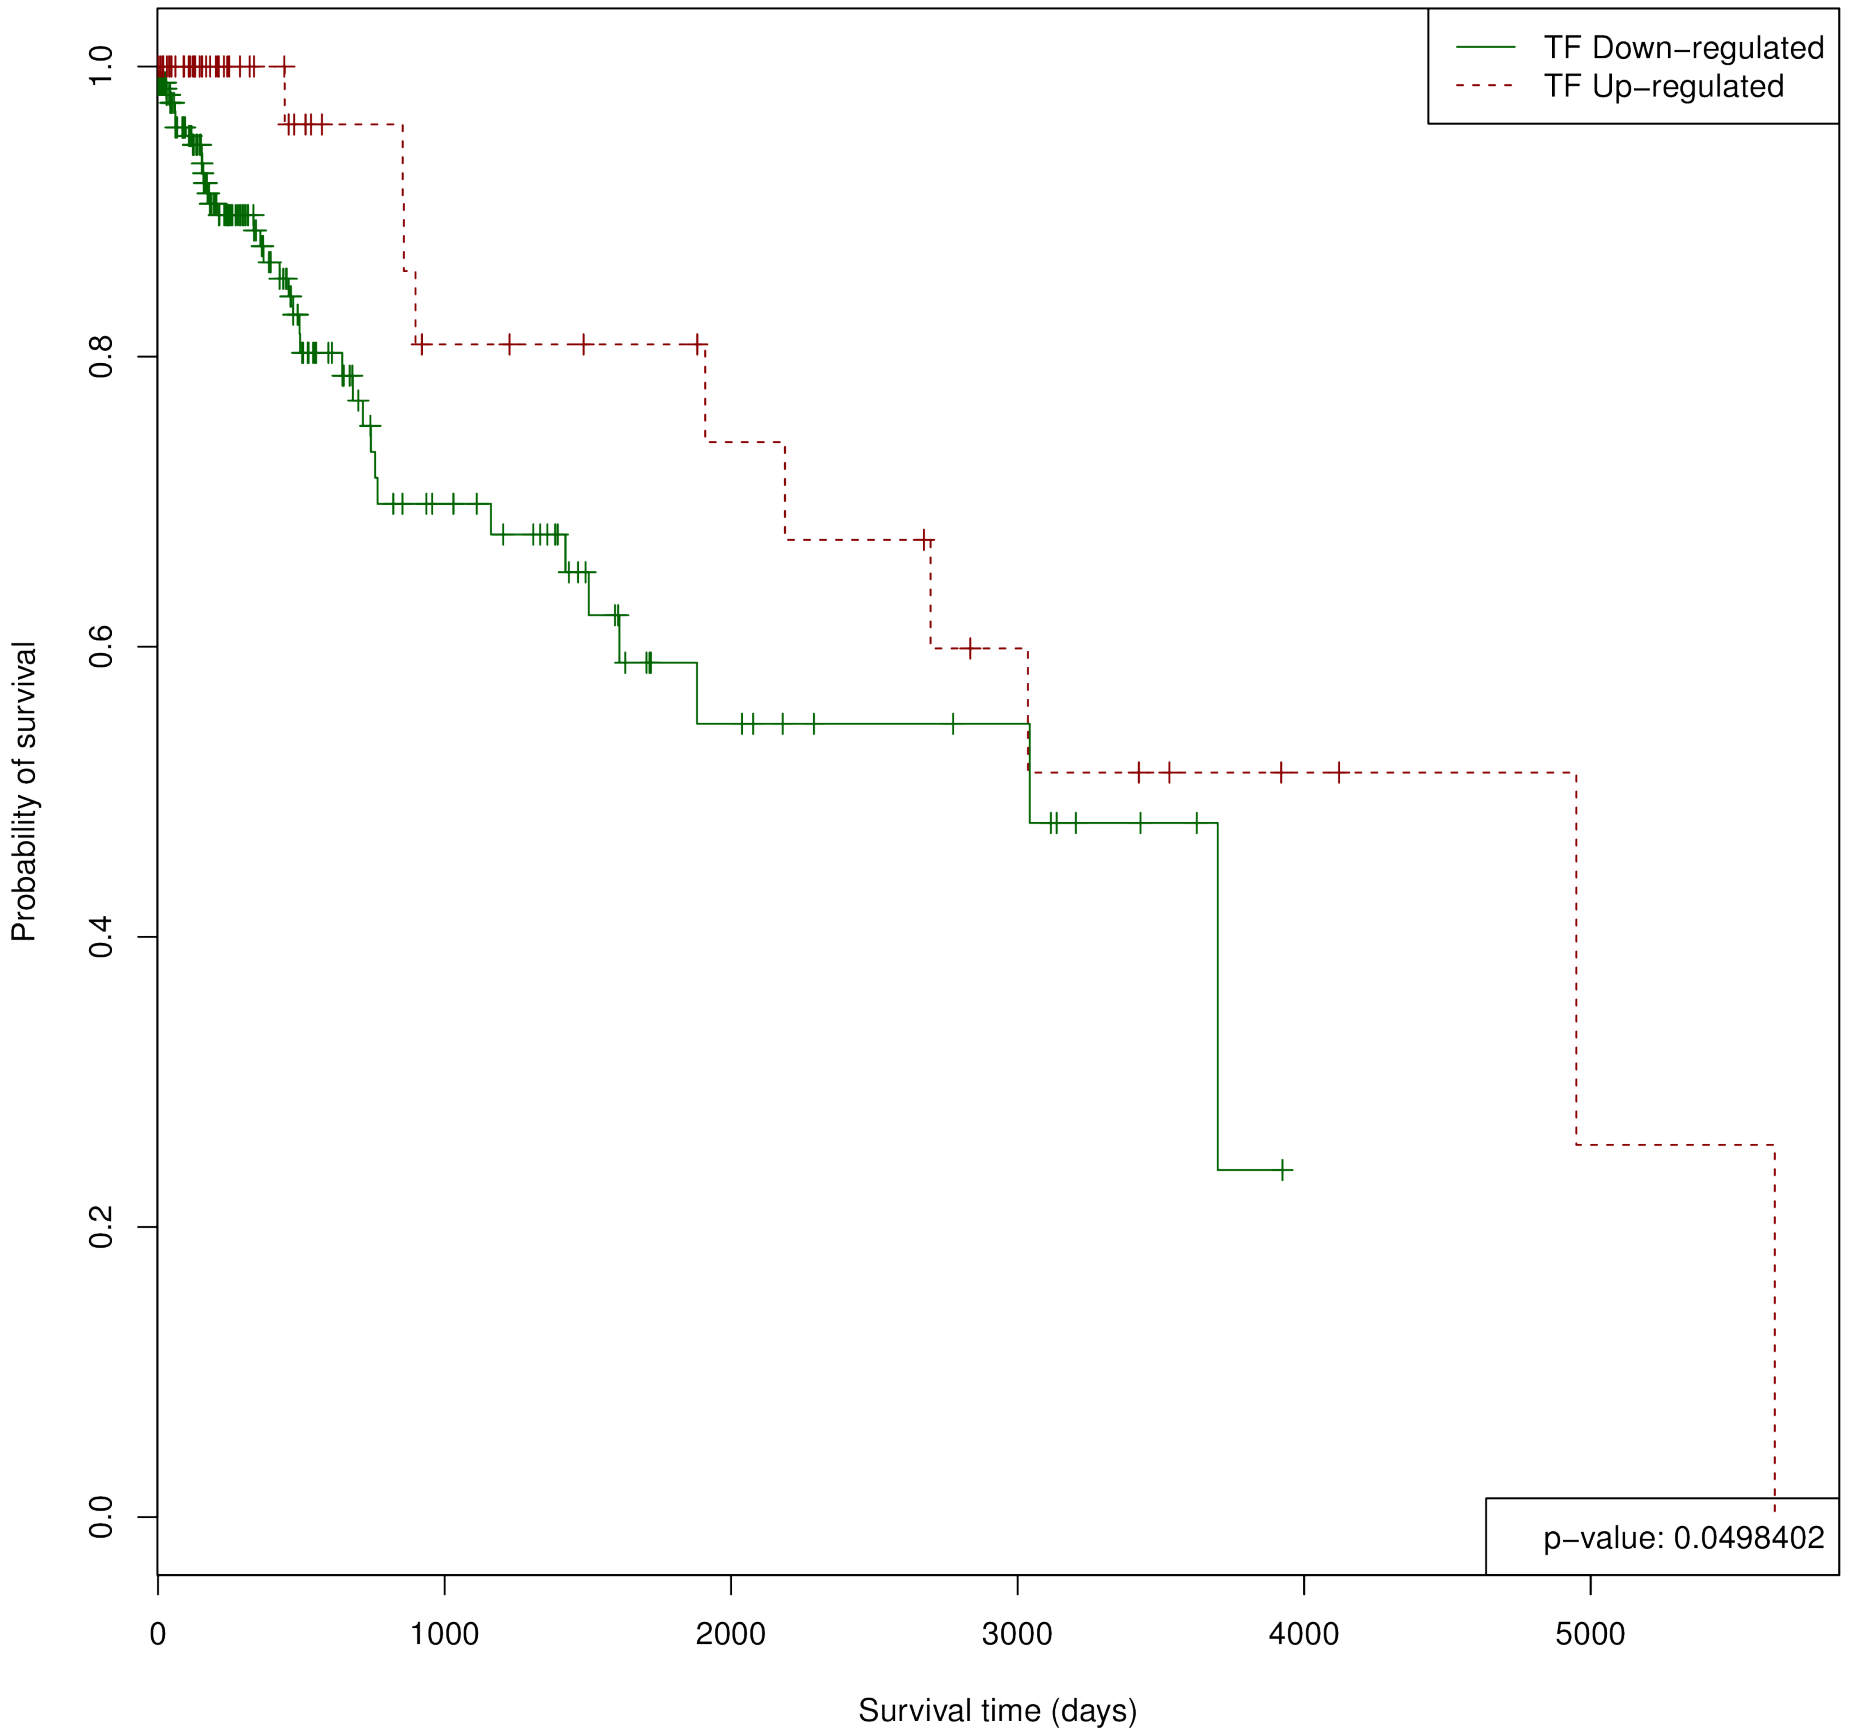

# FOXA2 in COAD

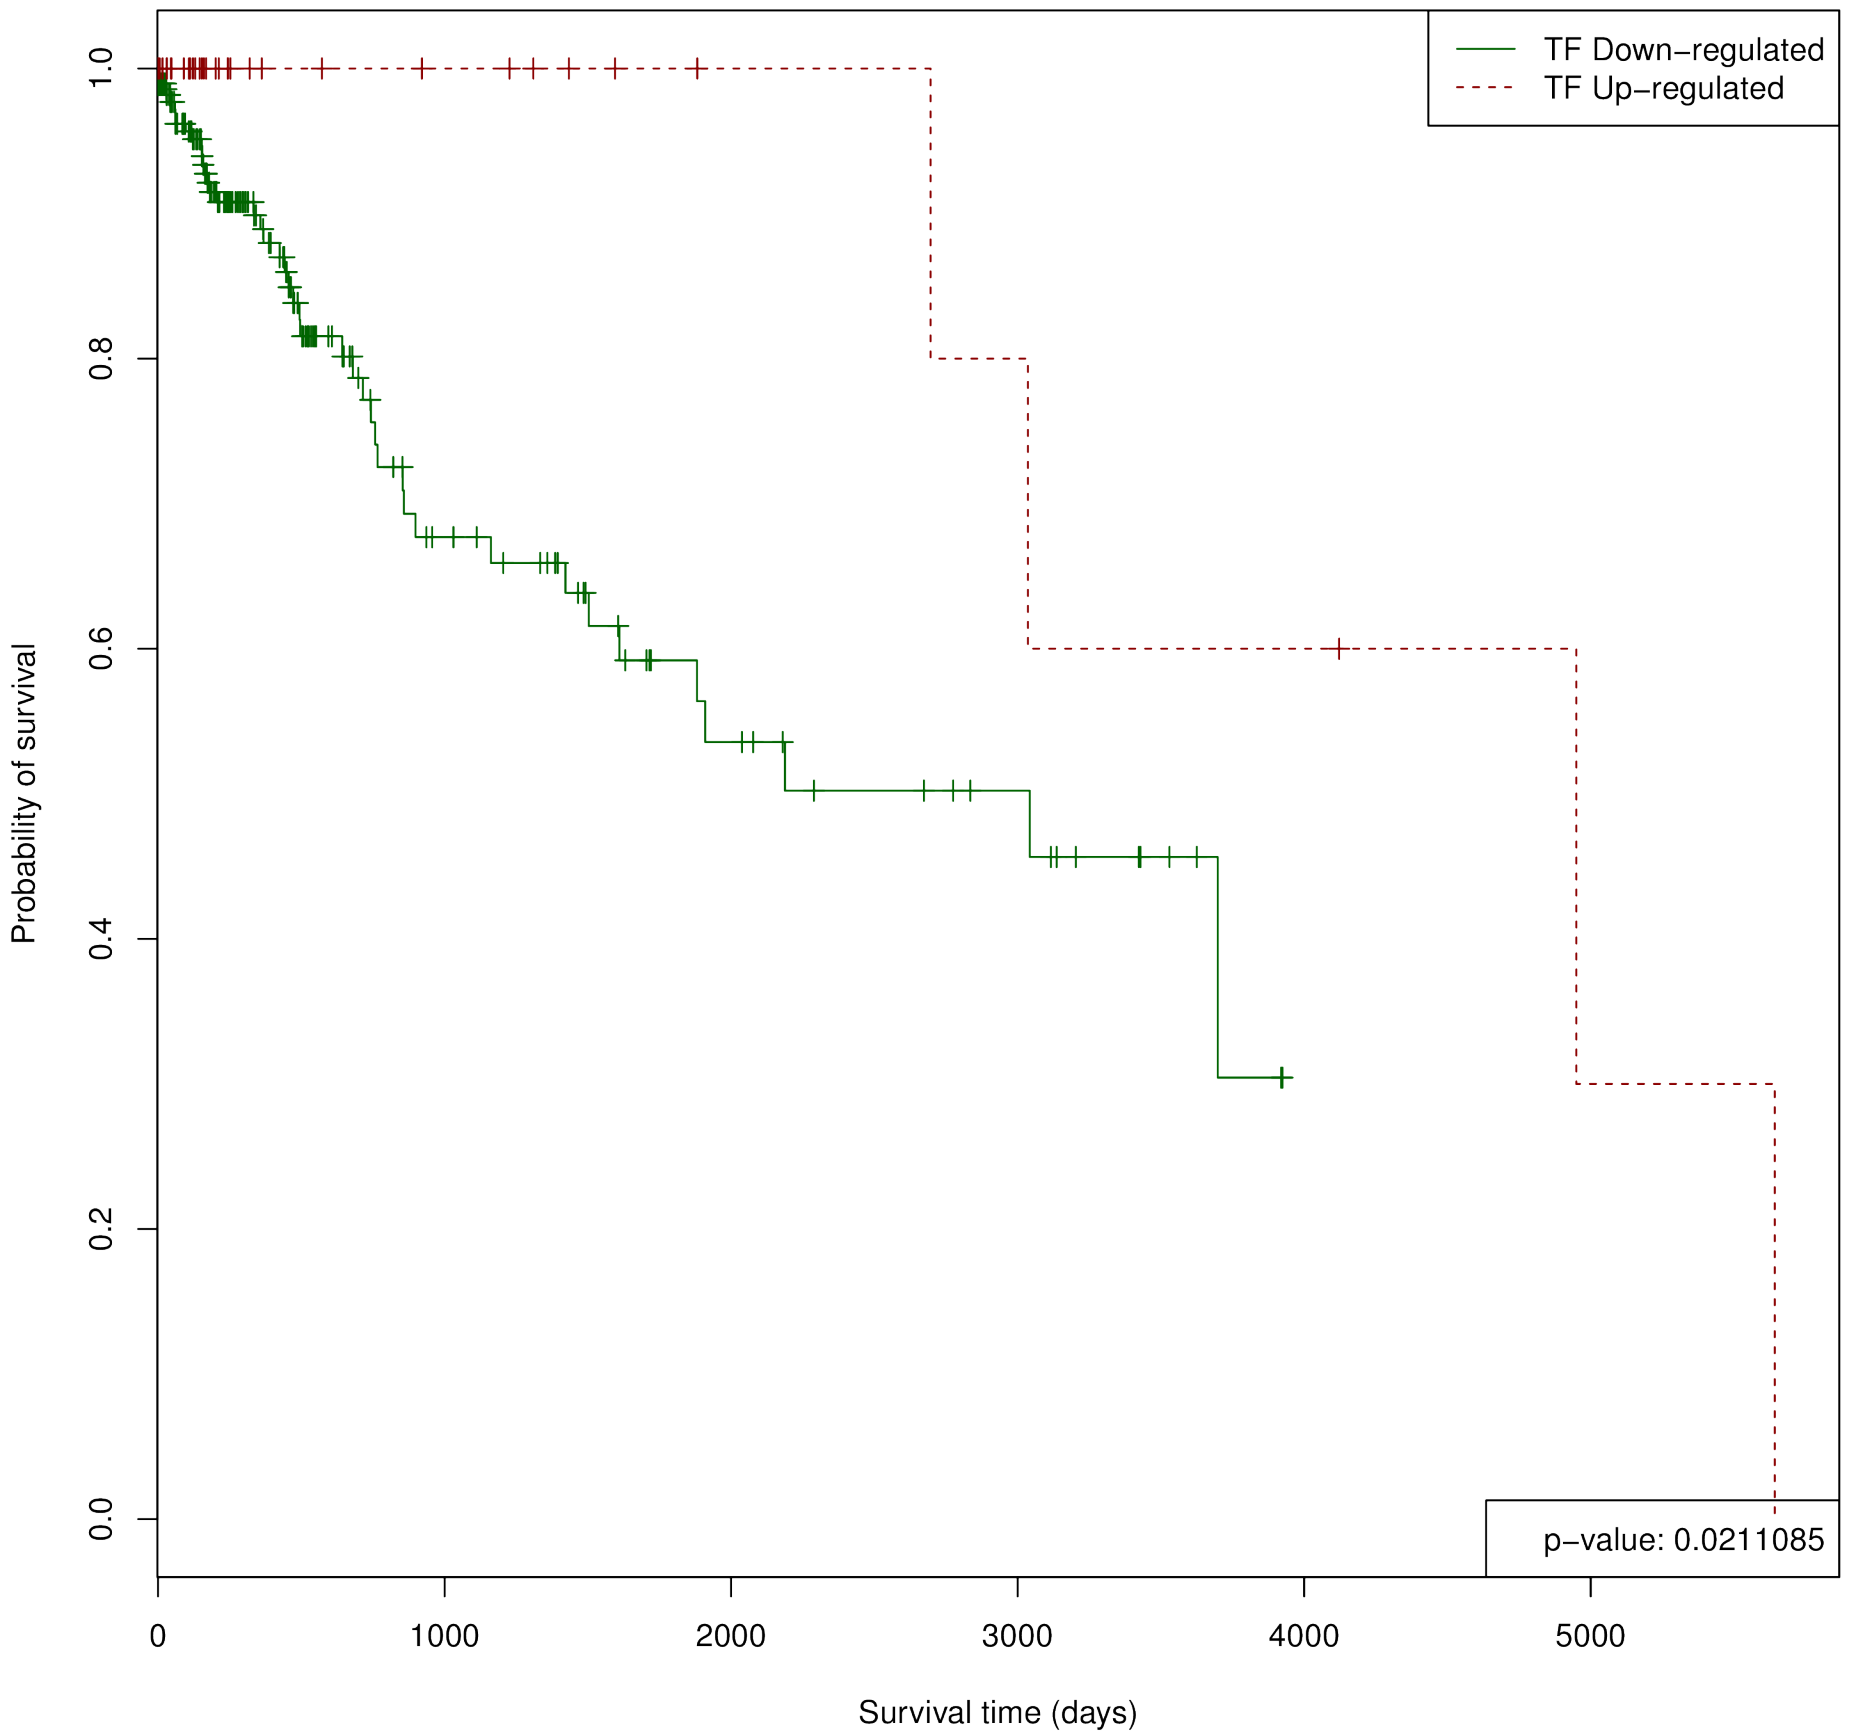

# FOXA2 in KIRC

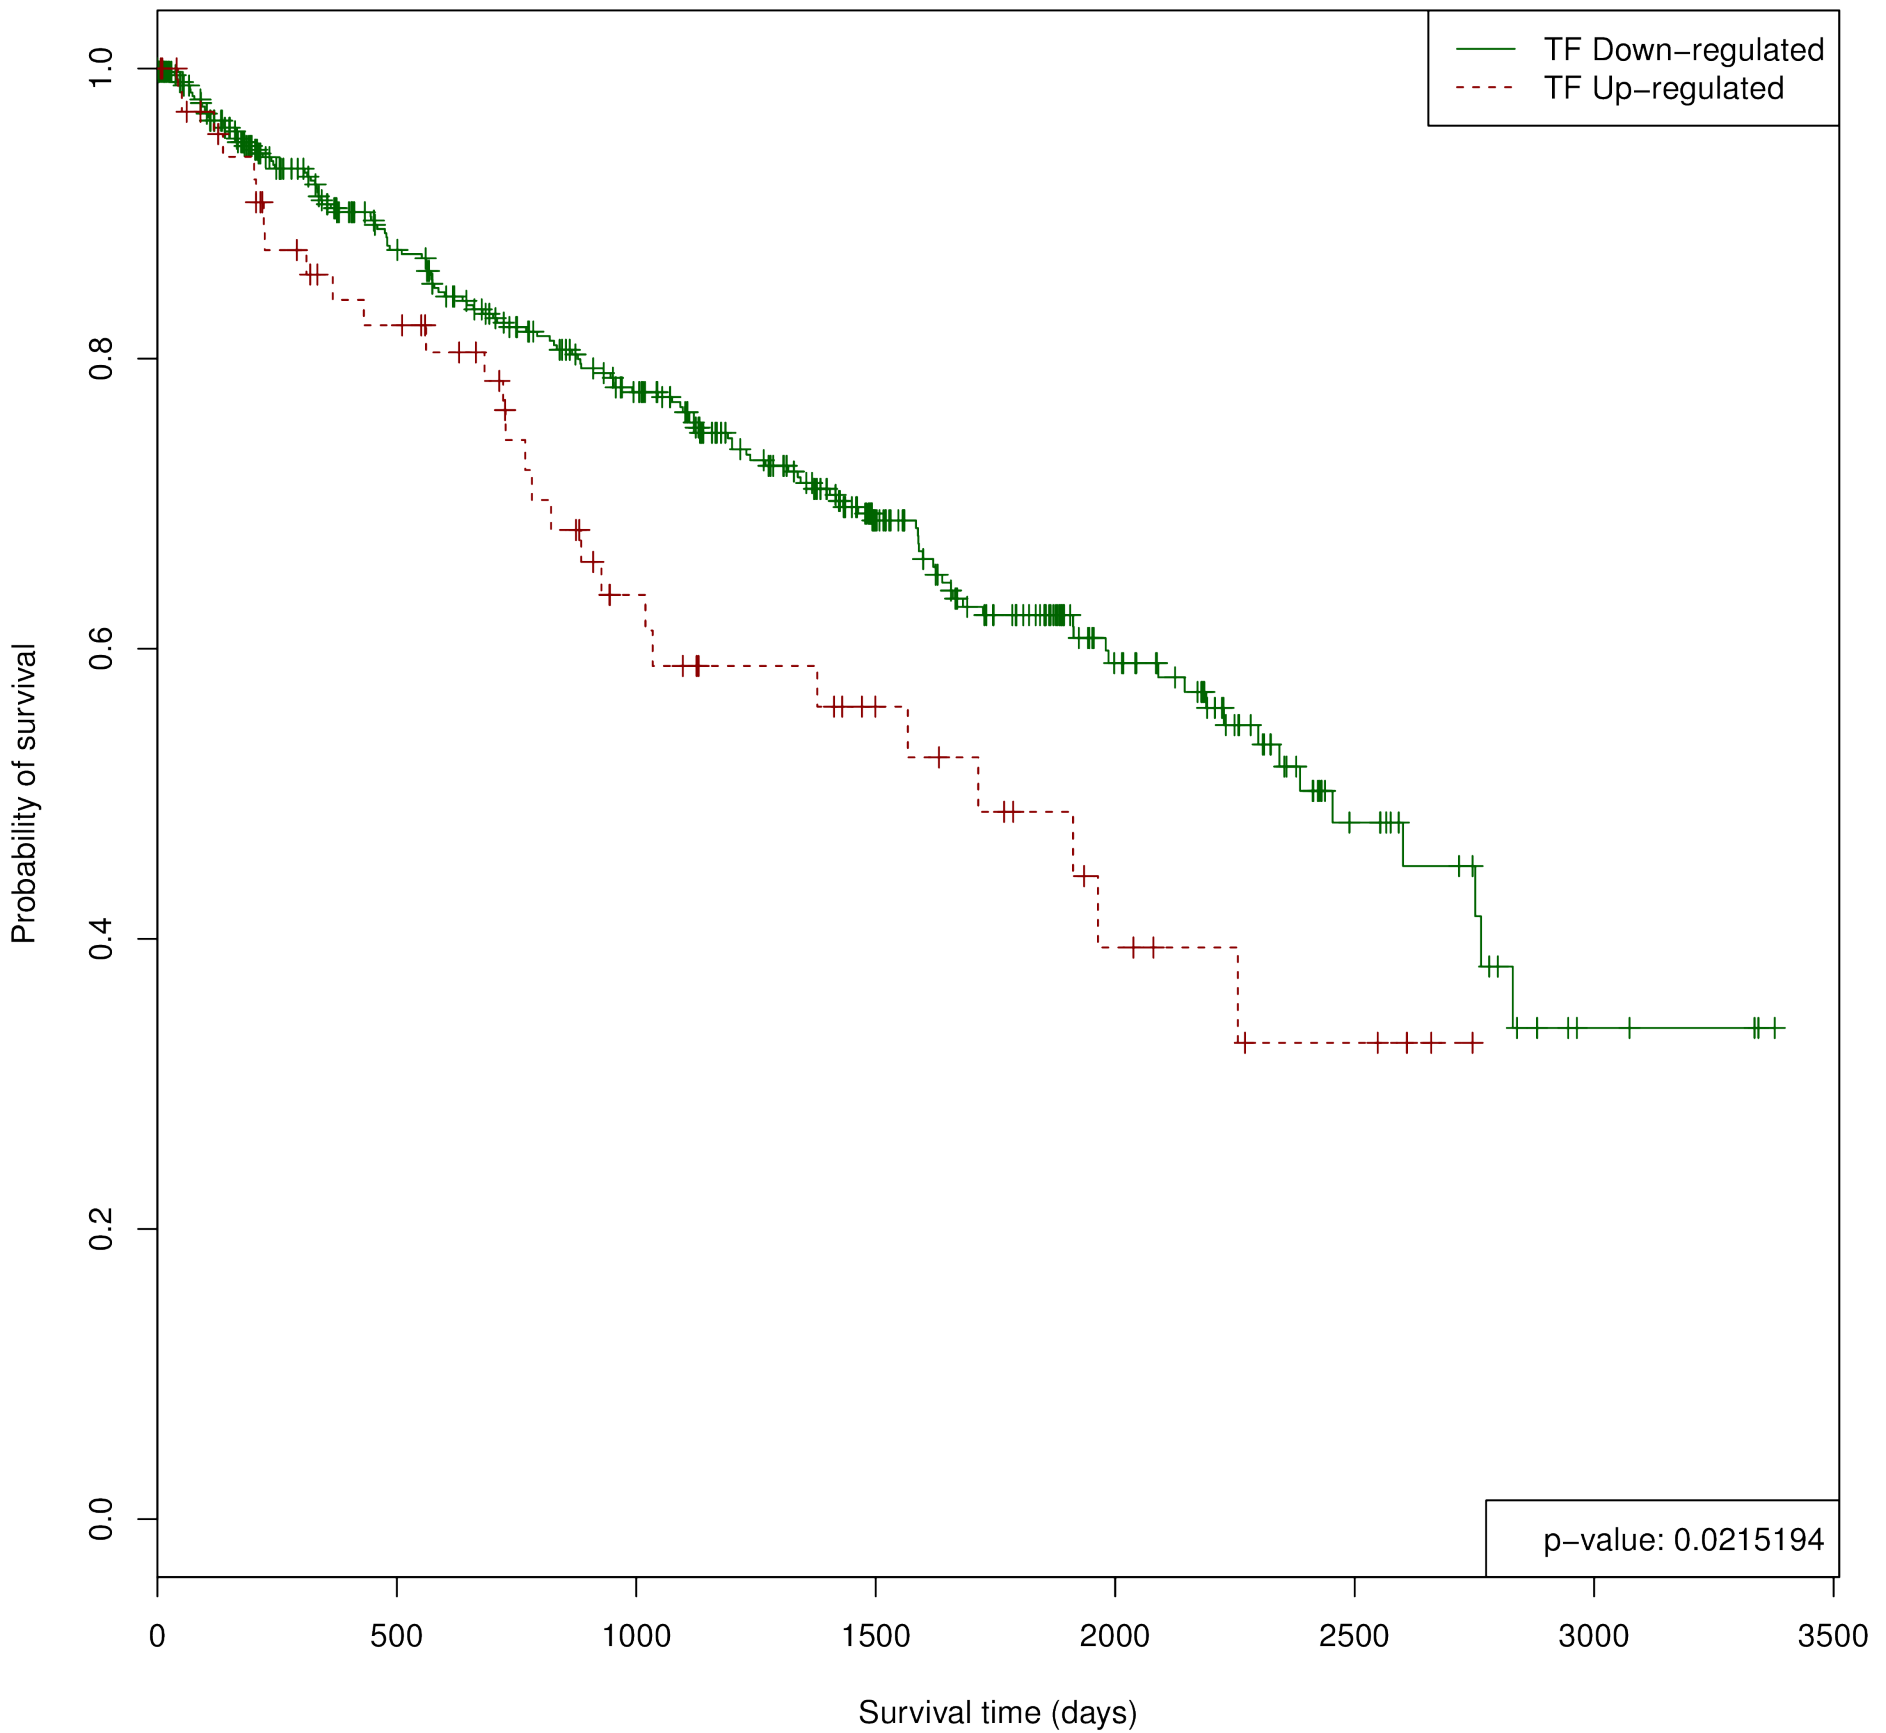

# GATA2 in BRCA

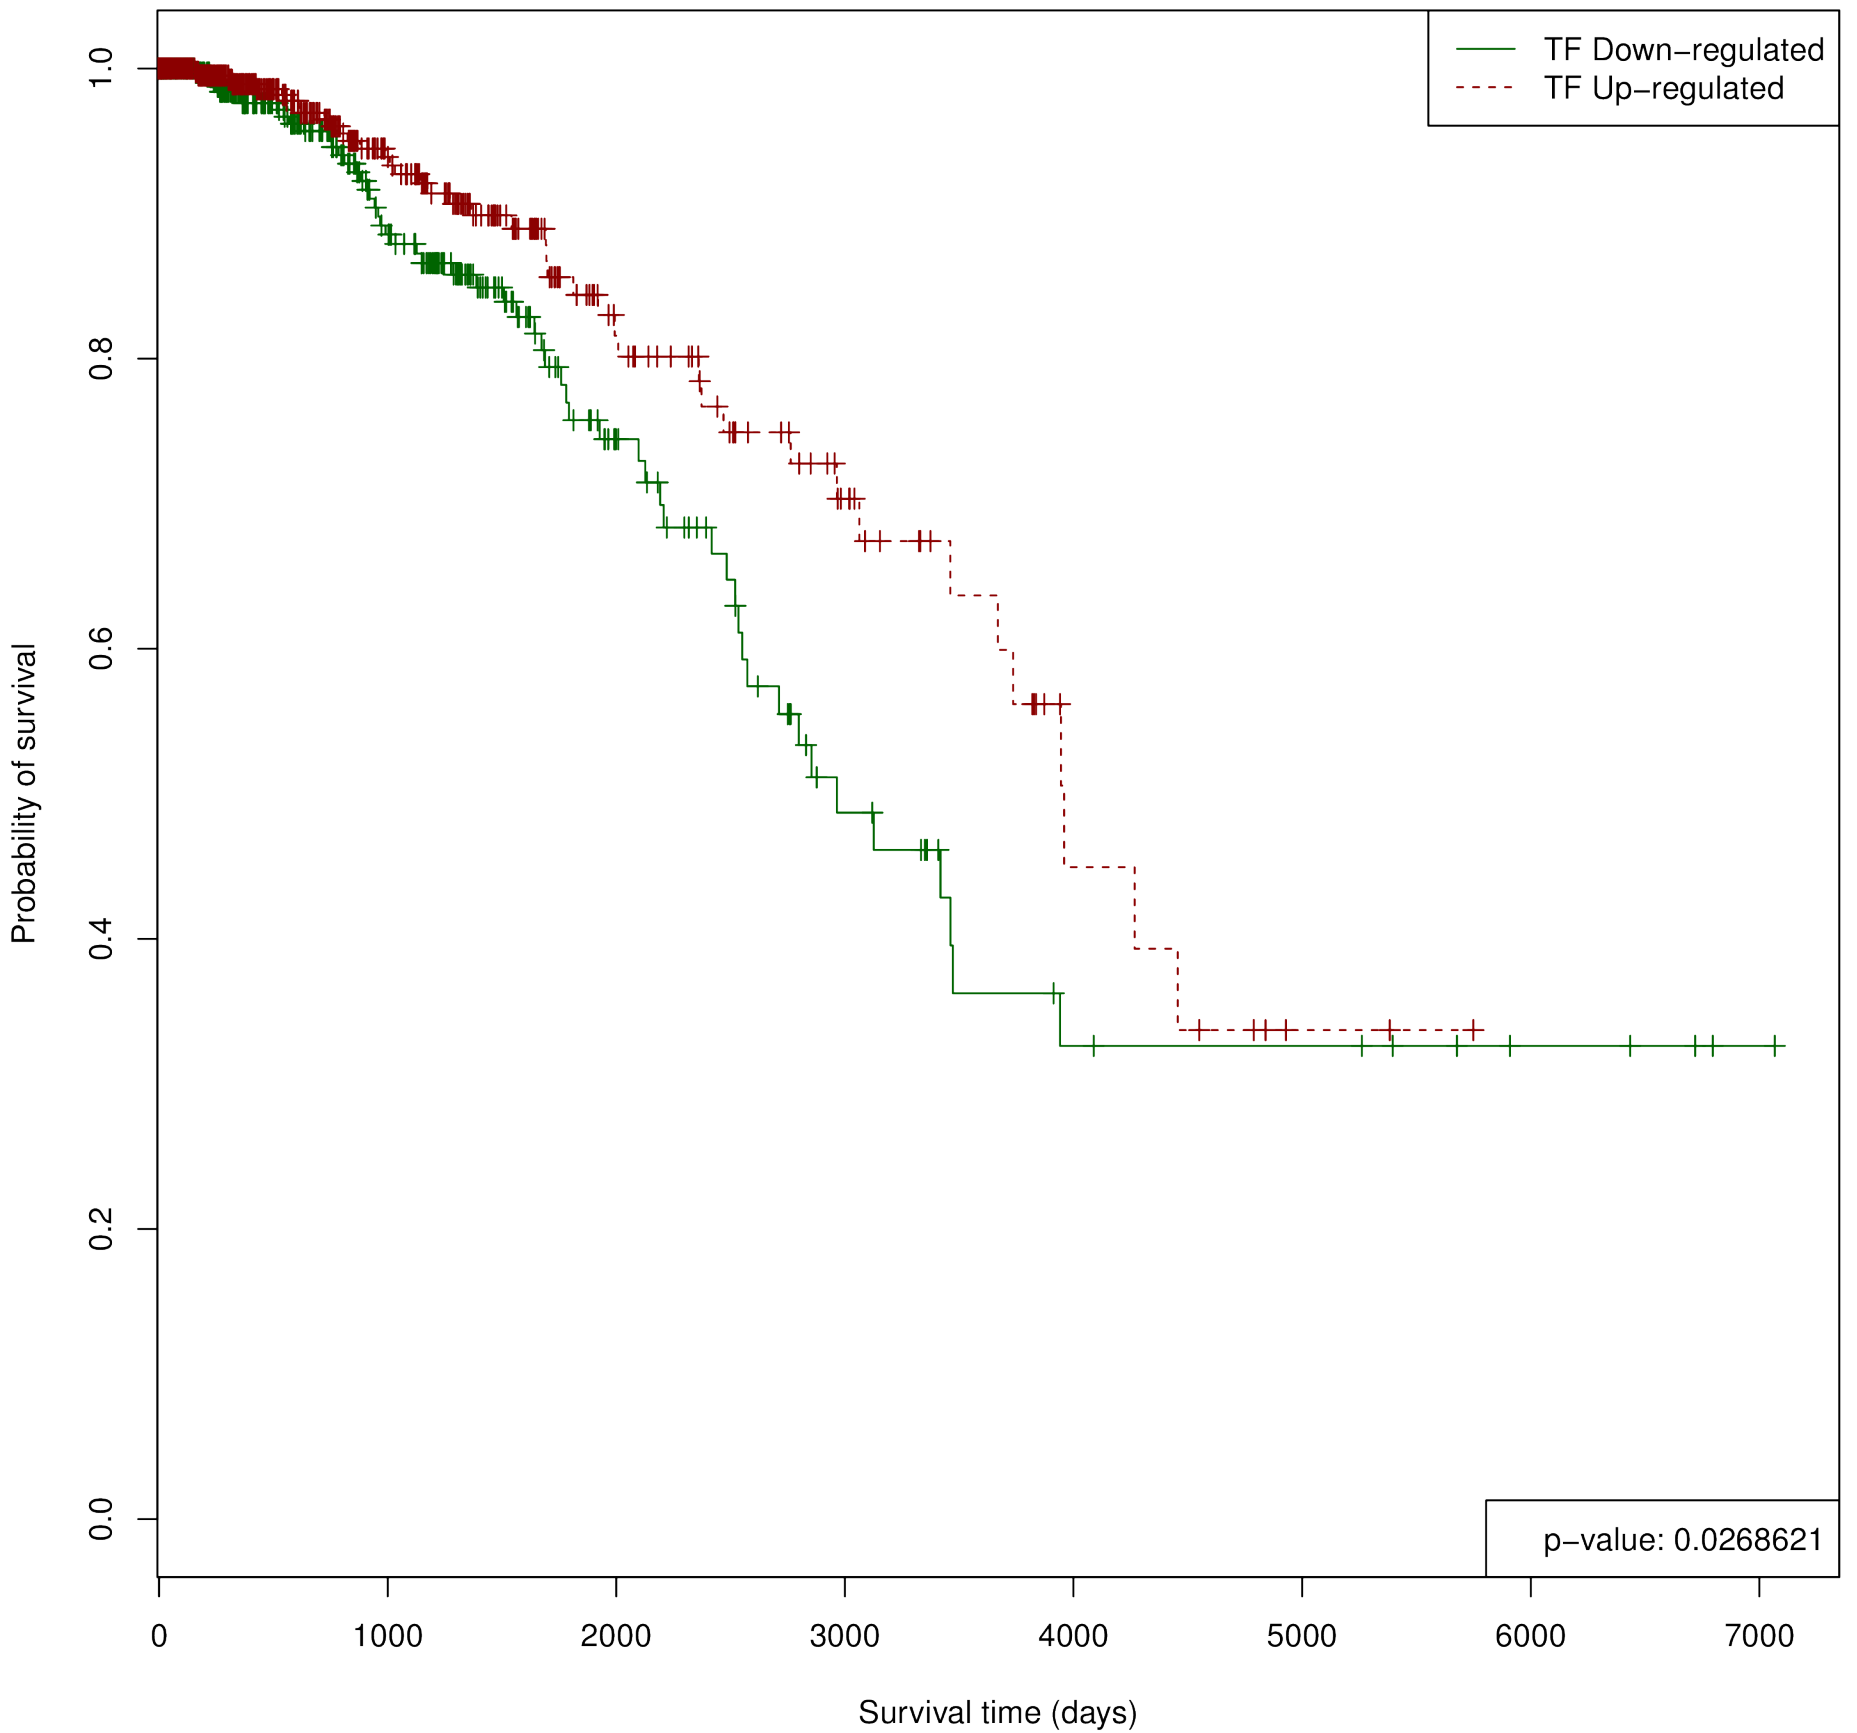



# GATA2 in UCEC

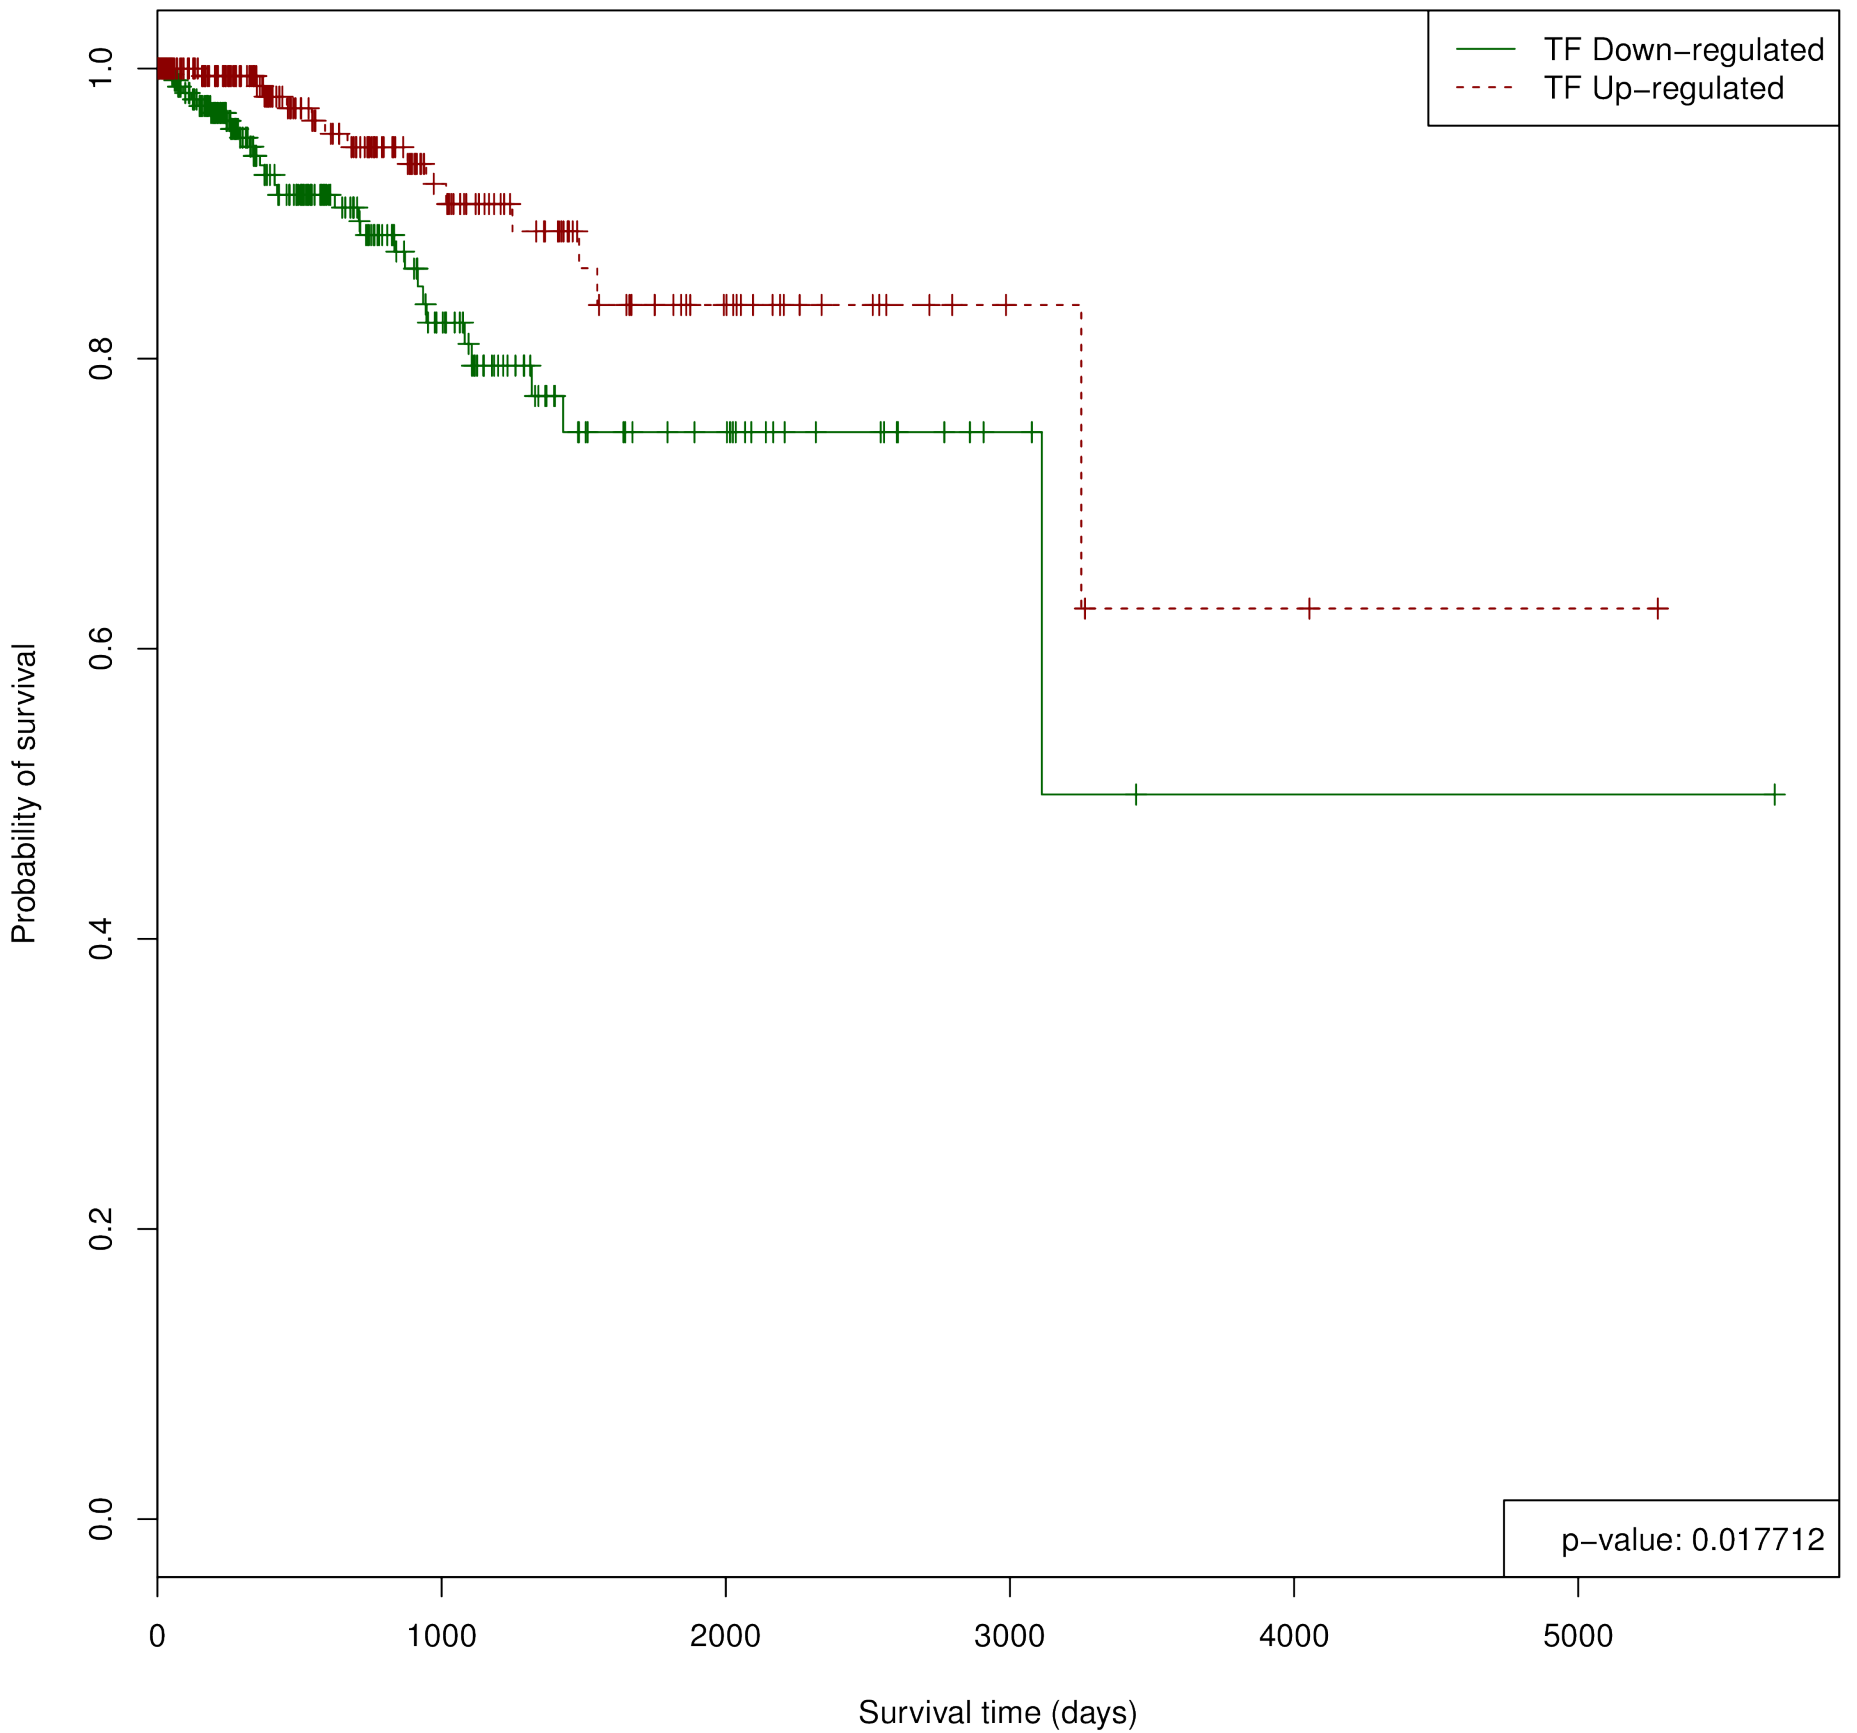

# HNF4A in THCA

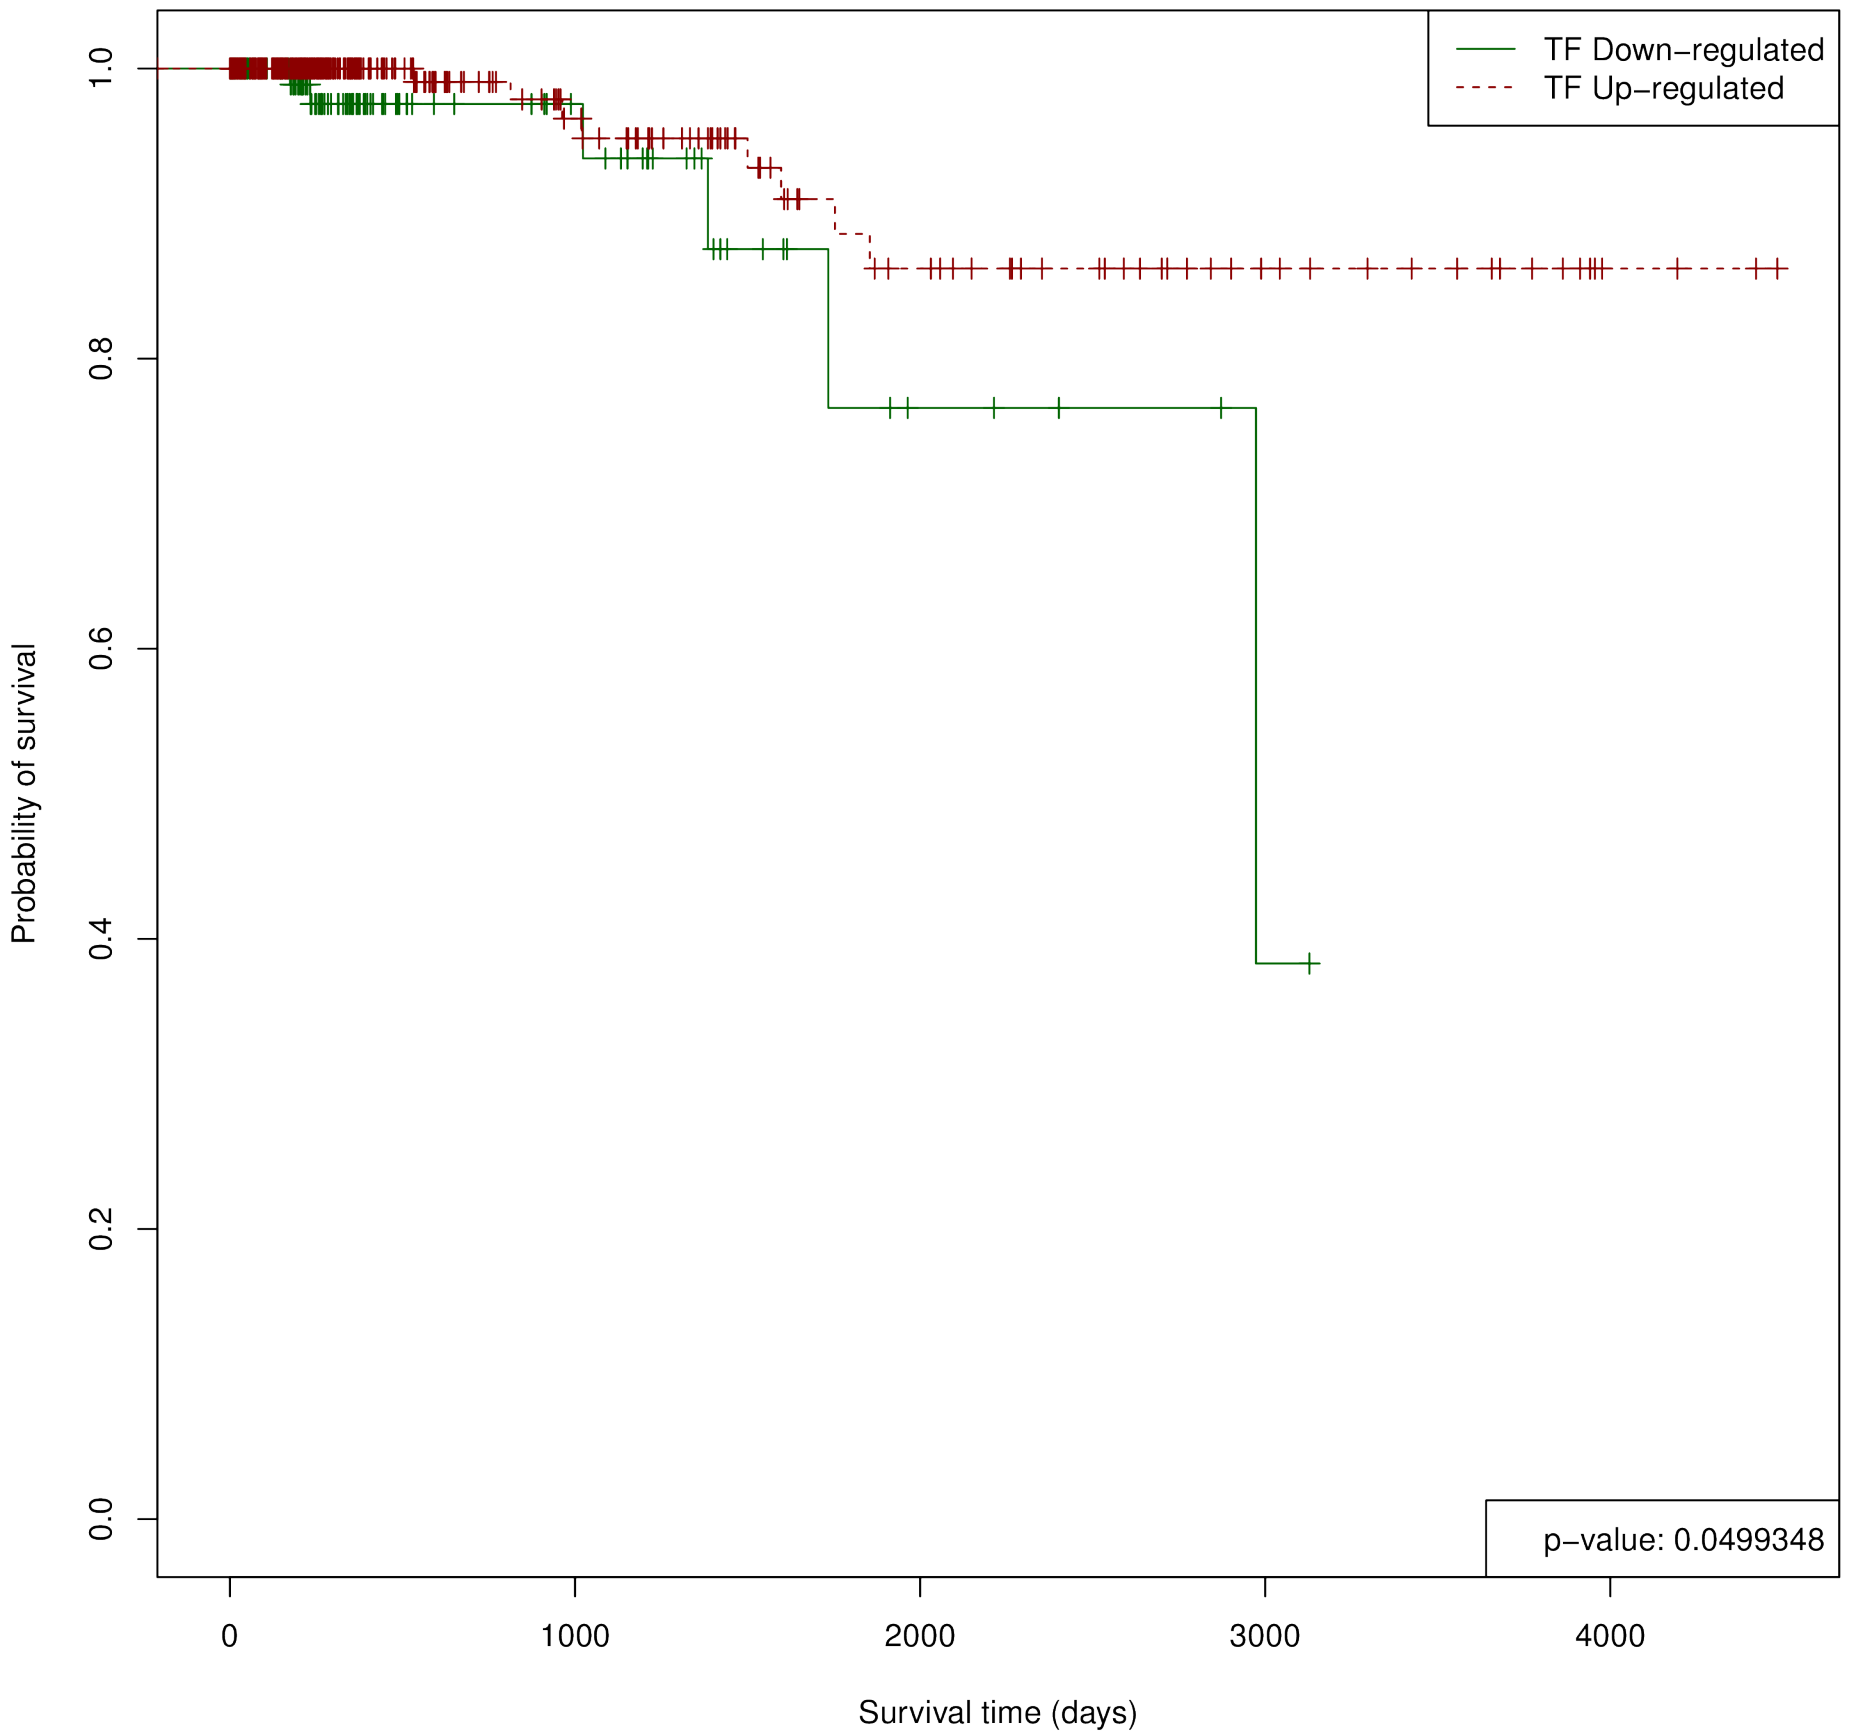

# HNF4G in COAD

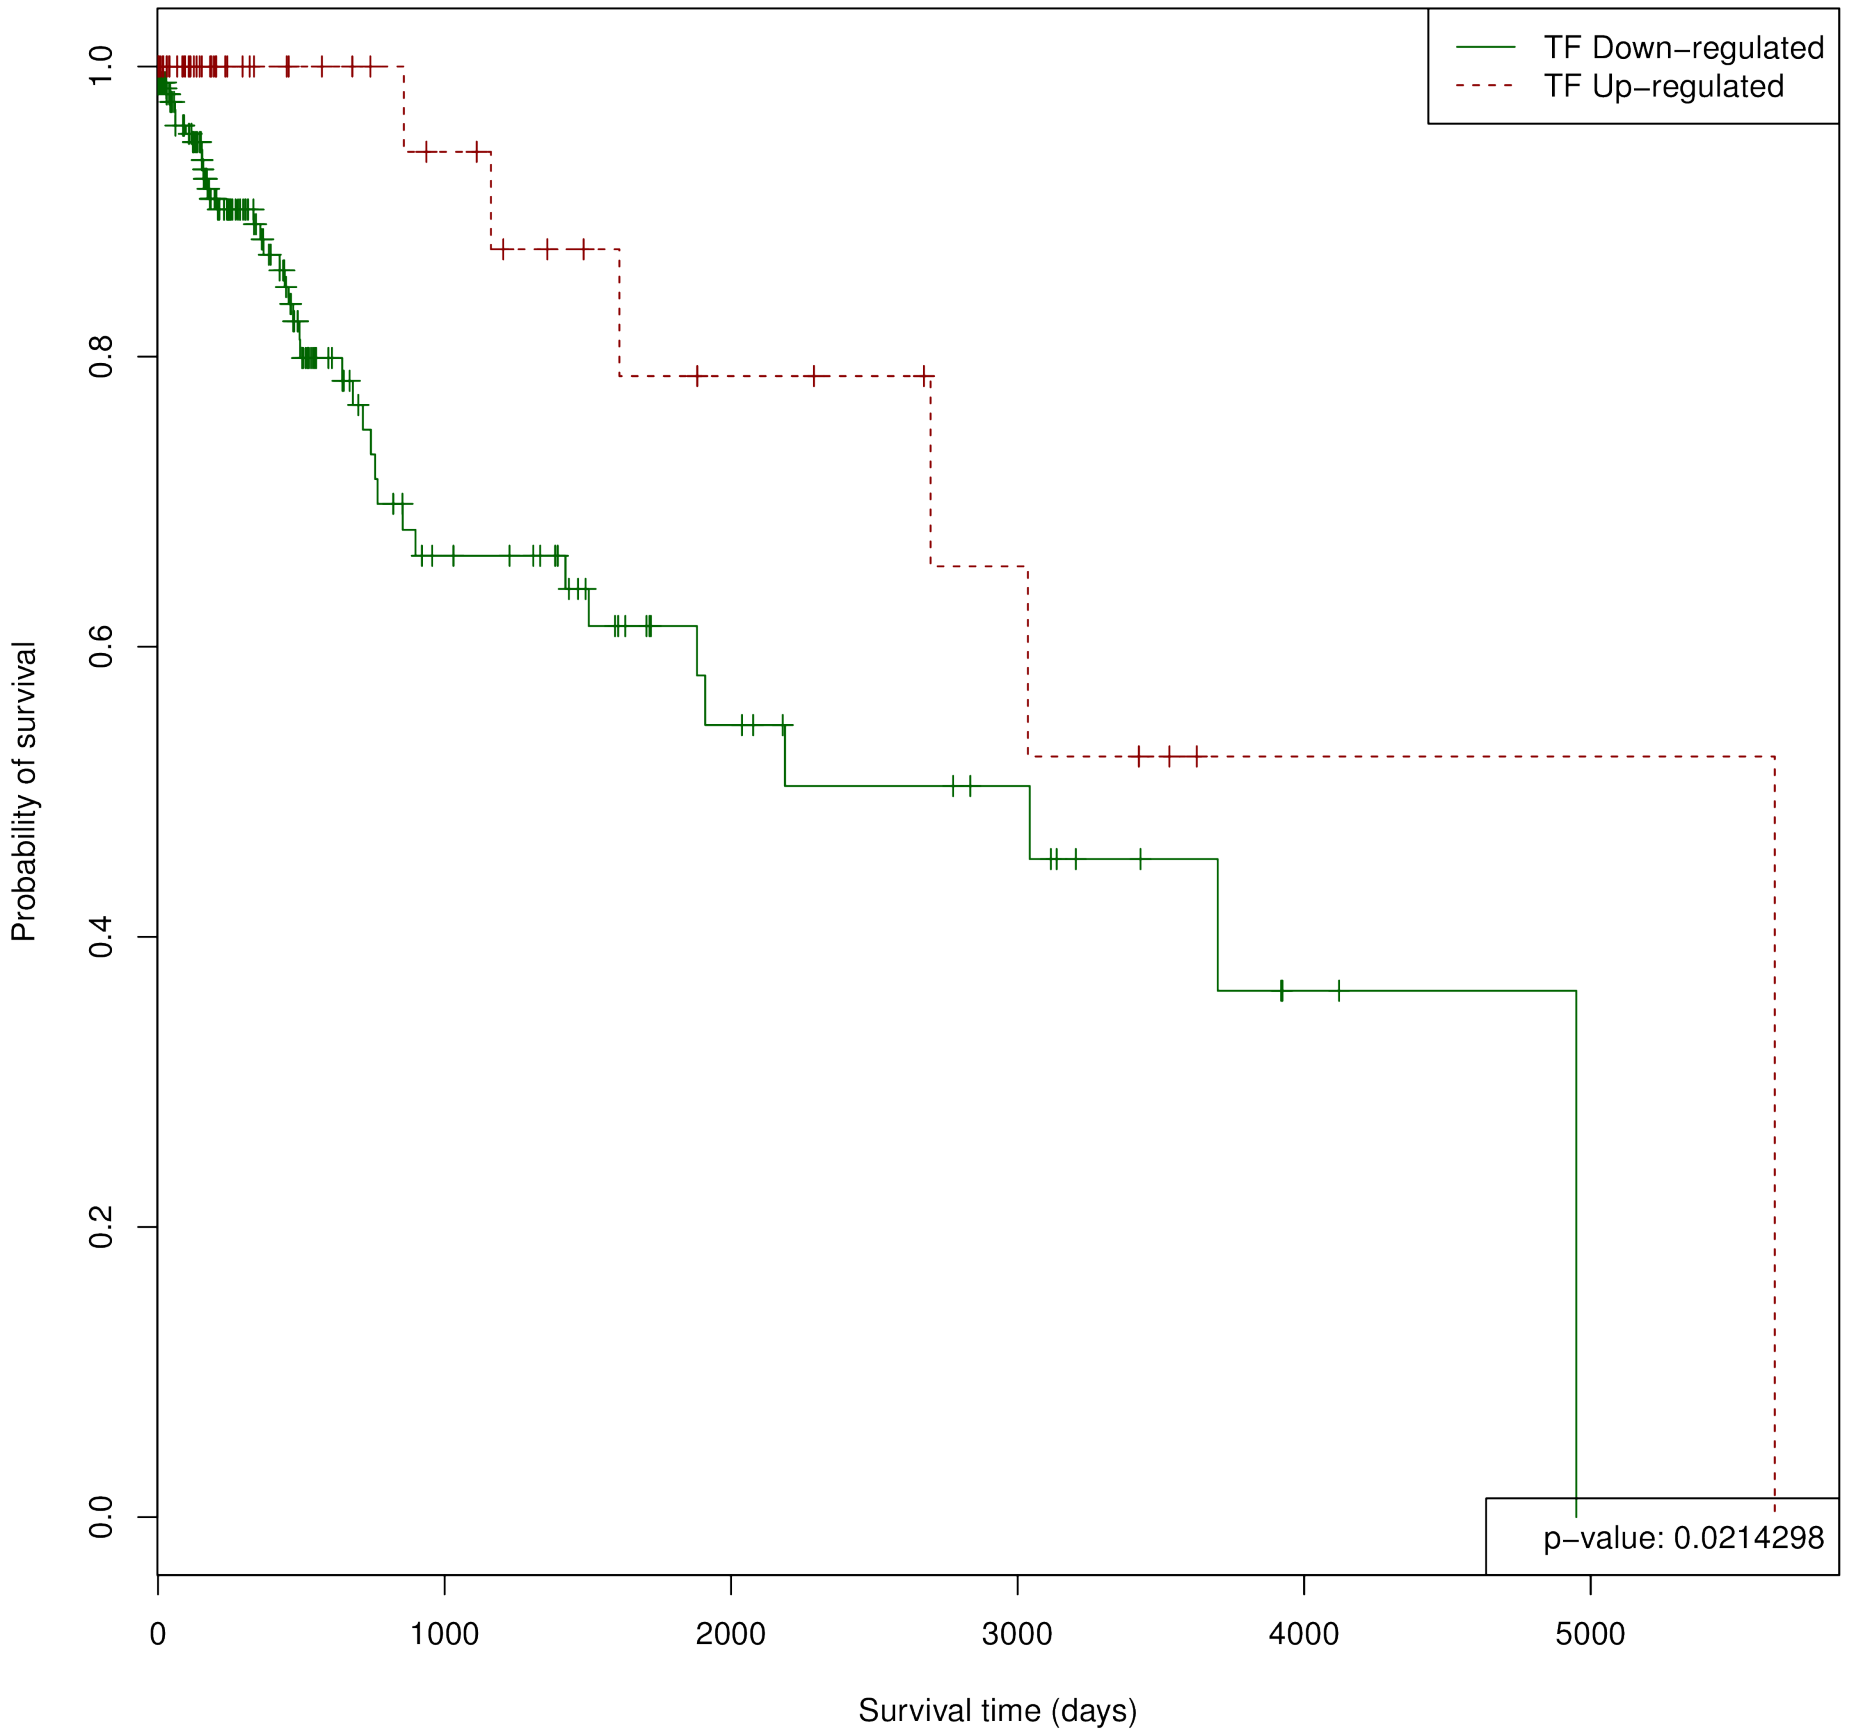

# HNF4G in KIRC

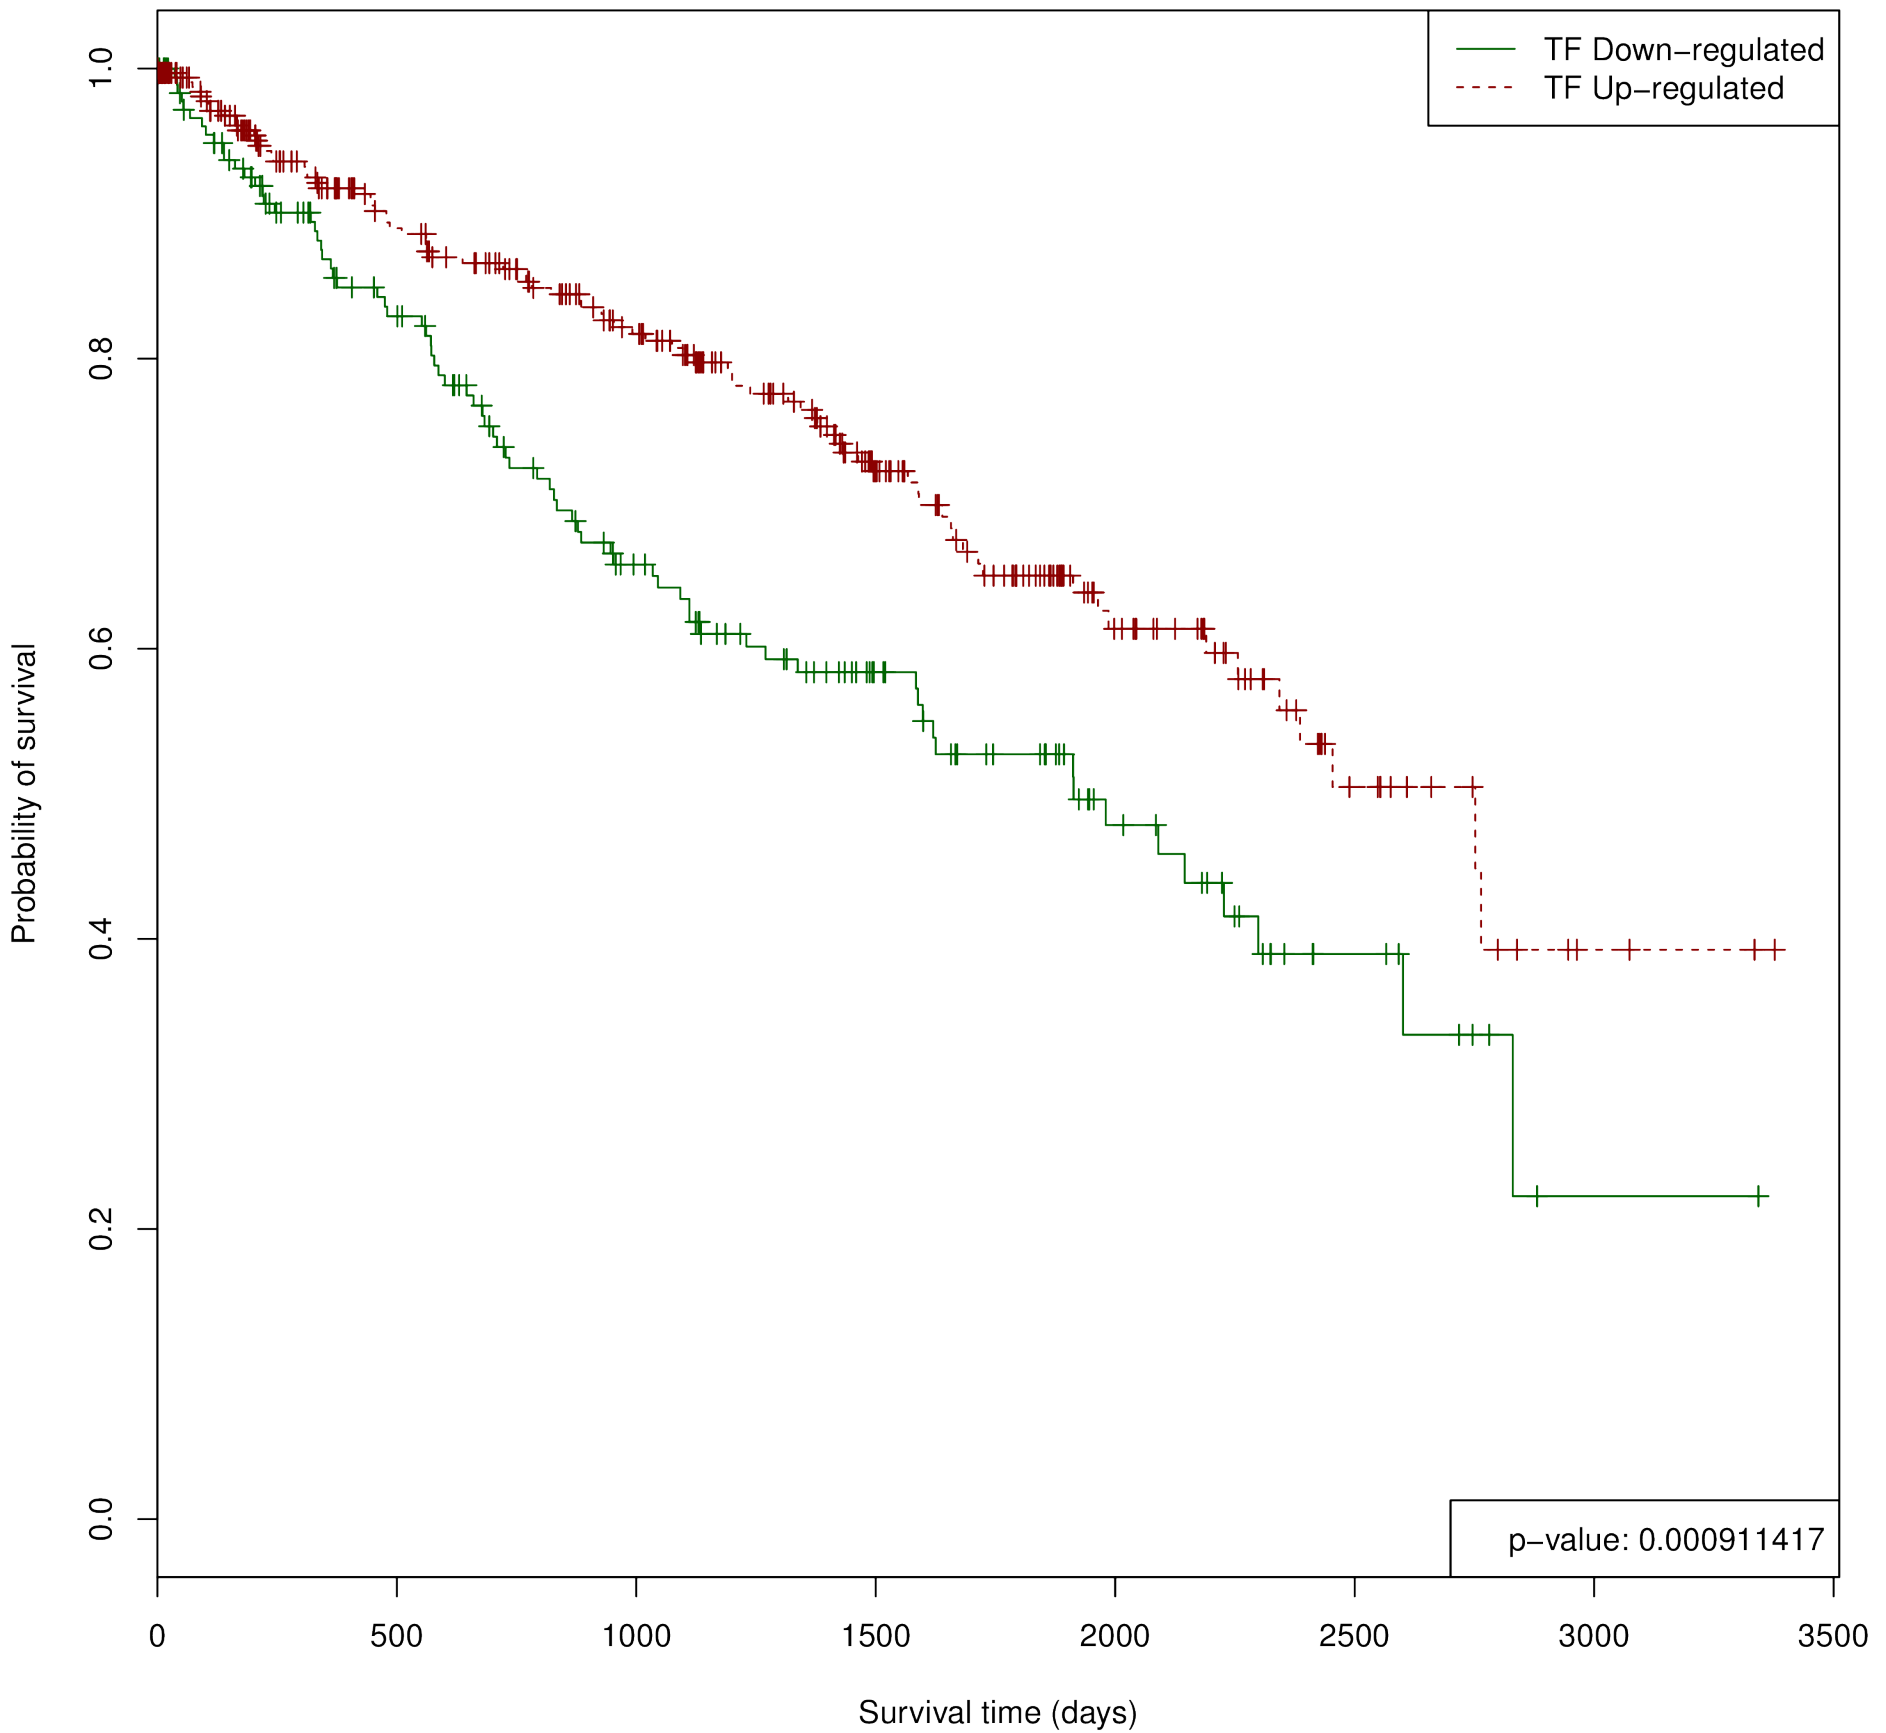

# HNF4G in UCEC

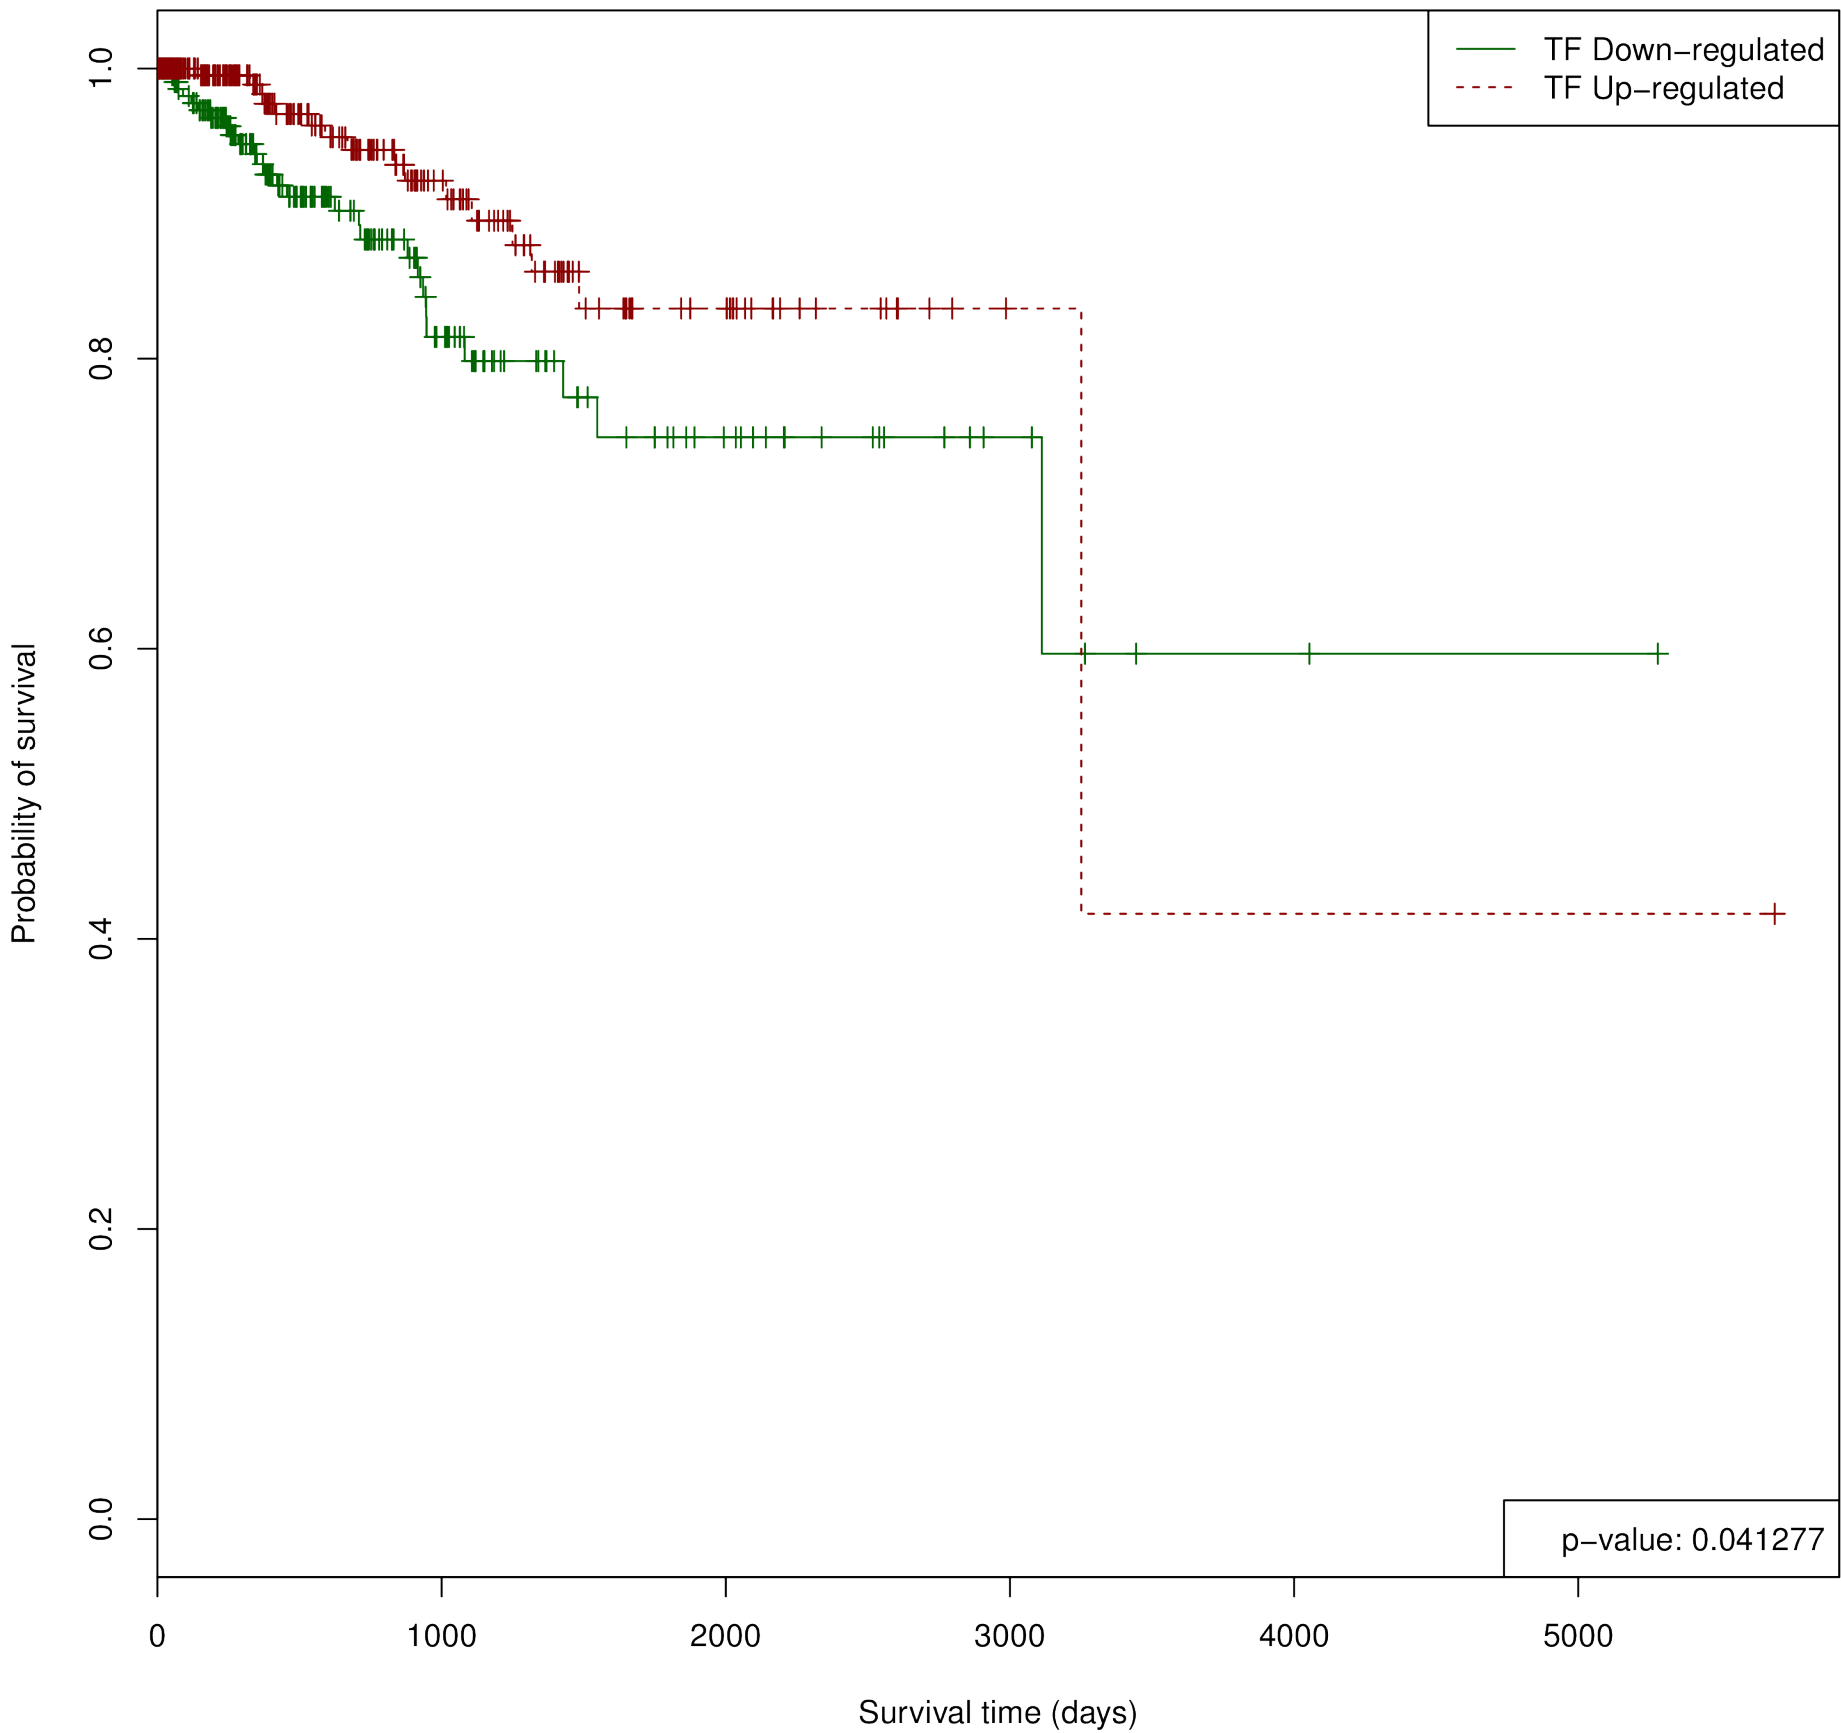

# IRF4 in KIRC

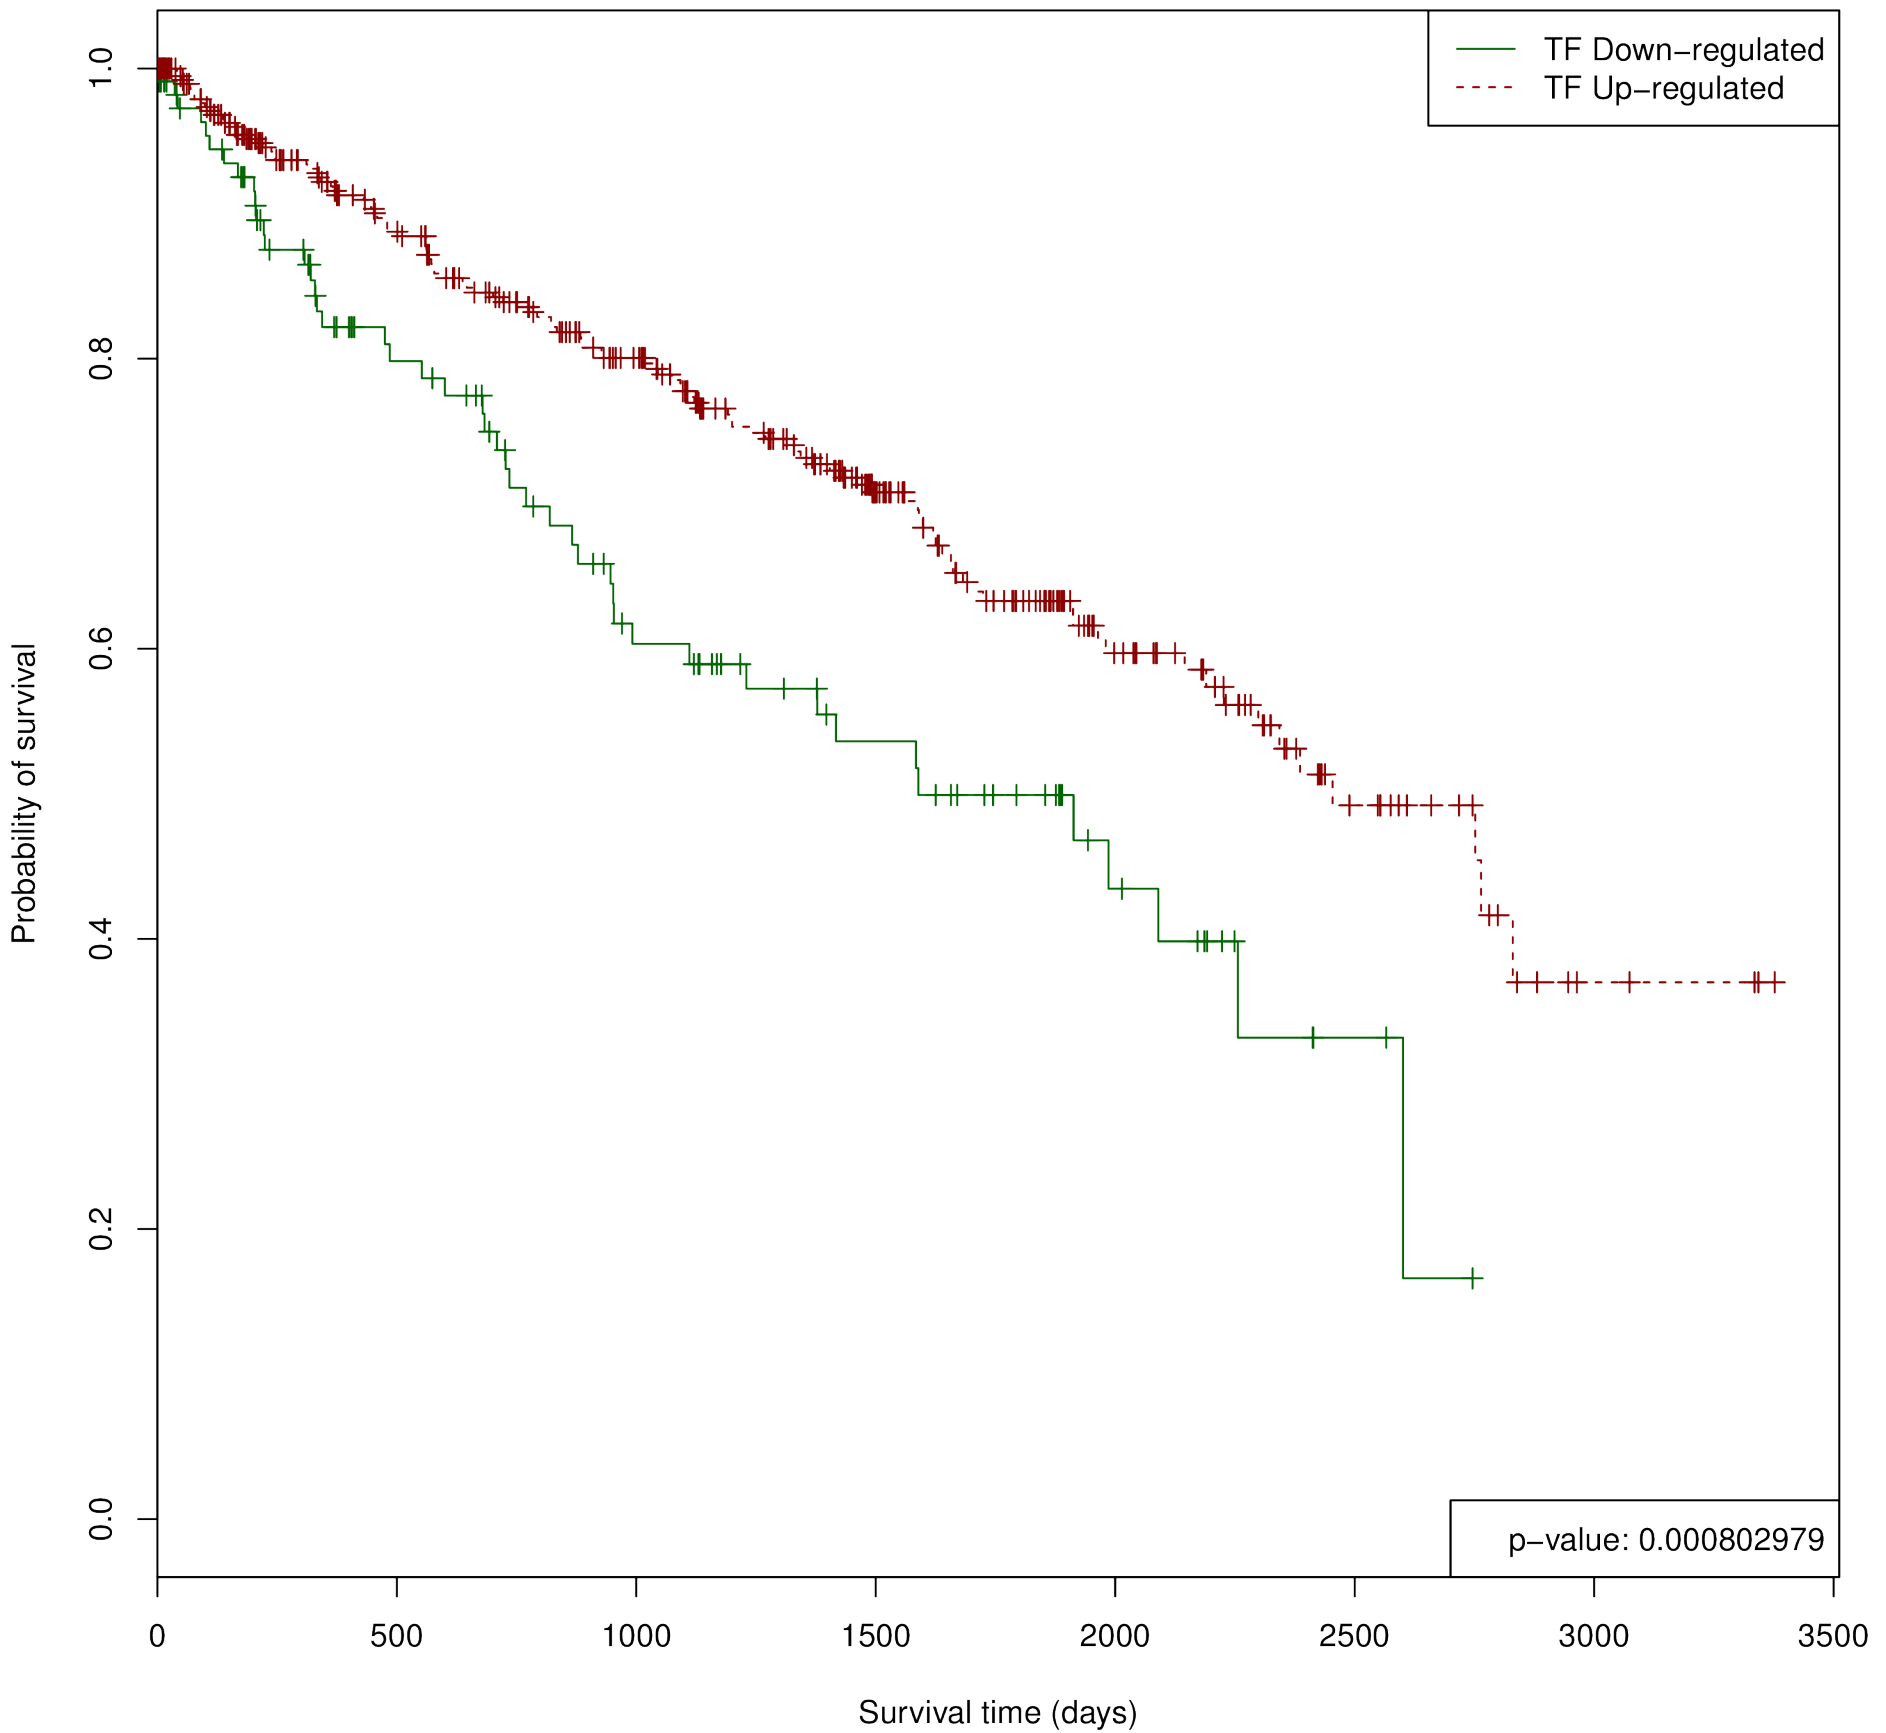

# JUNB in KIRC

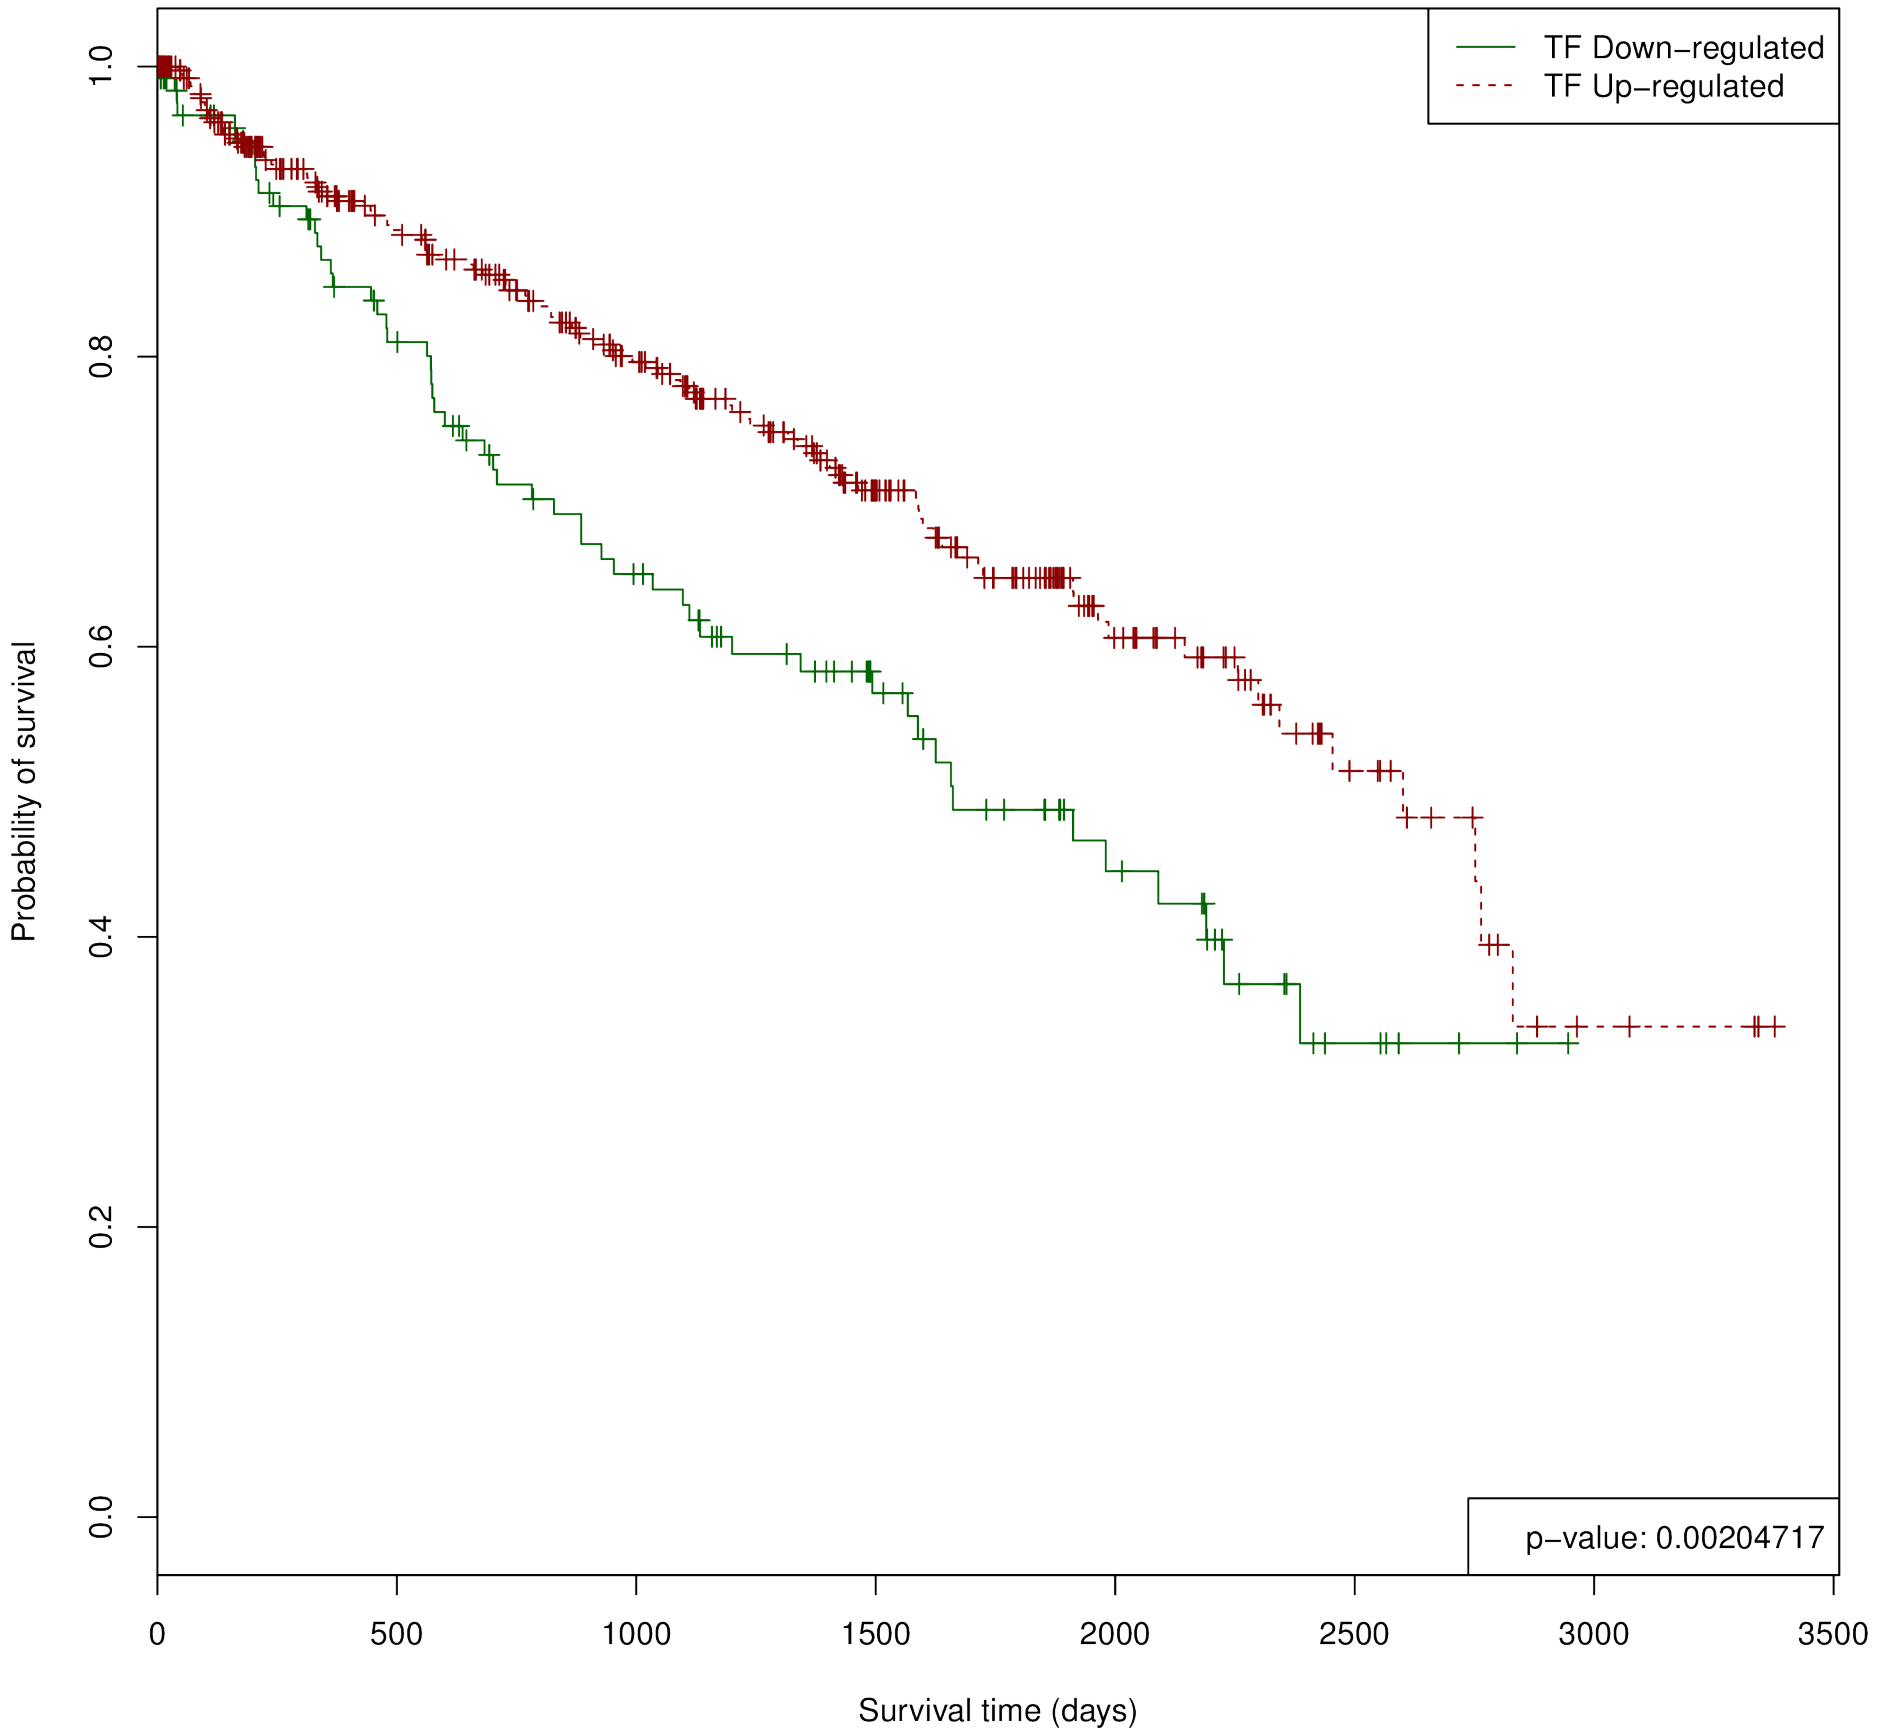

# JUND in HNSC

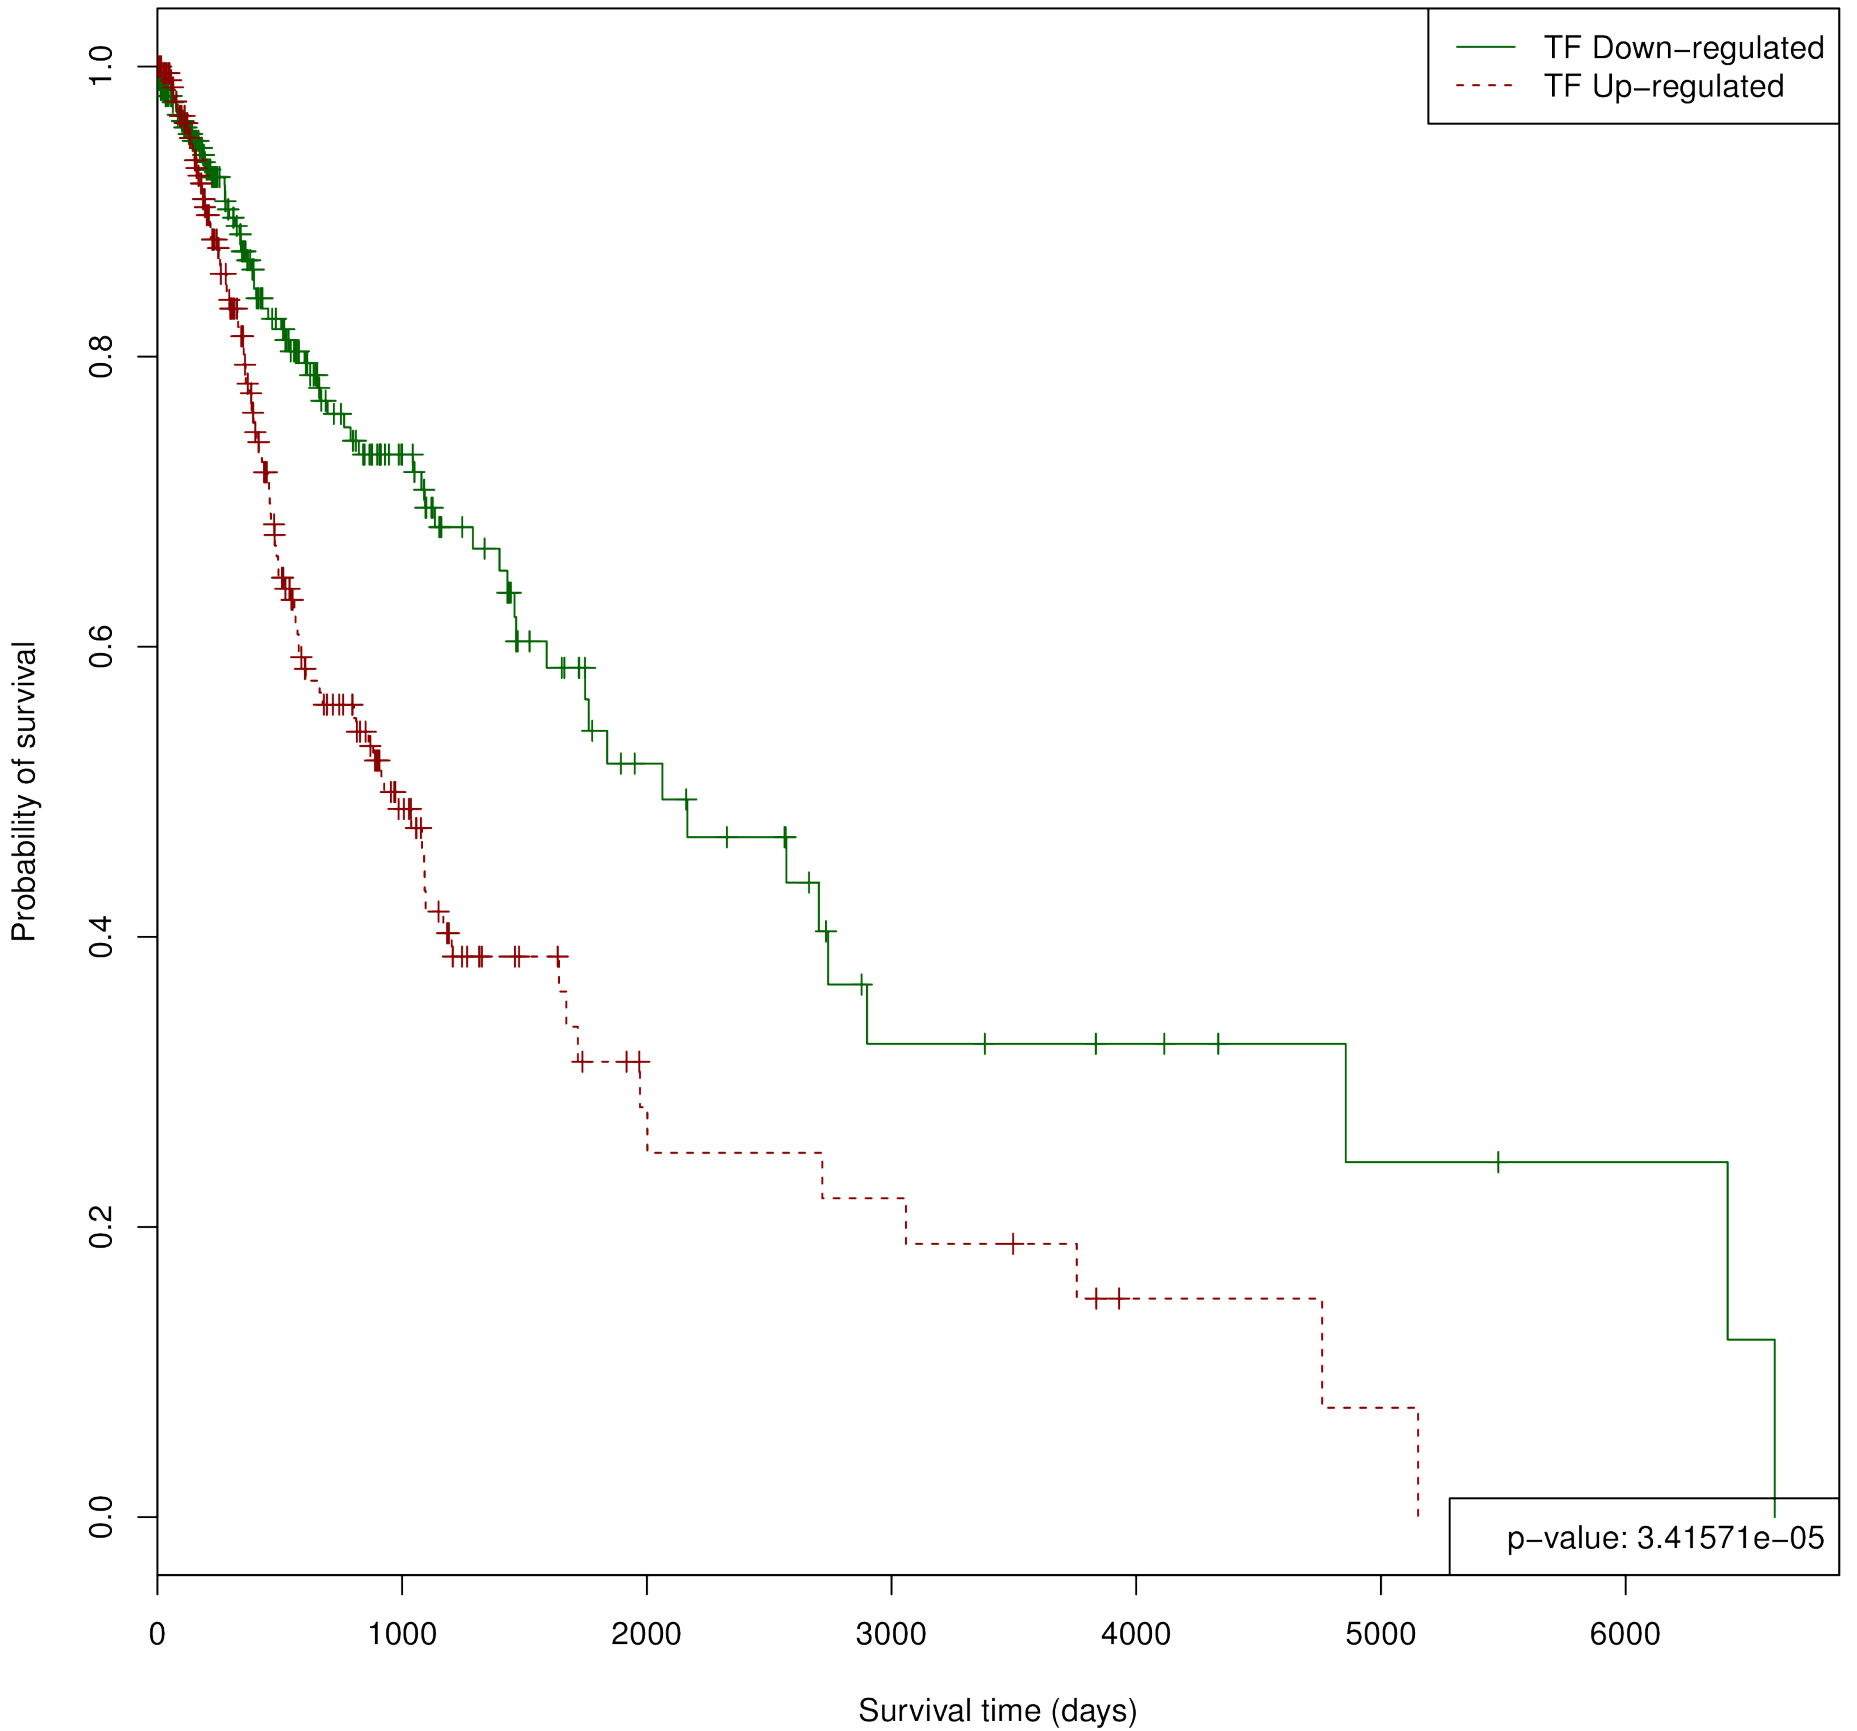



# JUND in KIRC

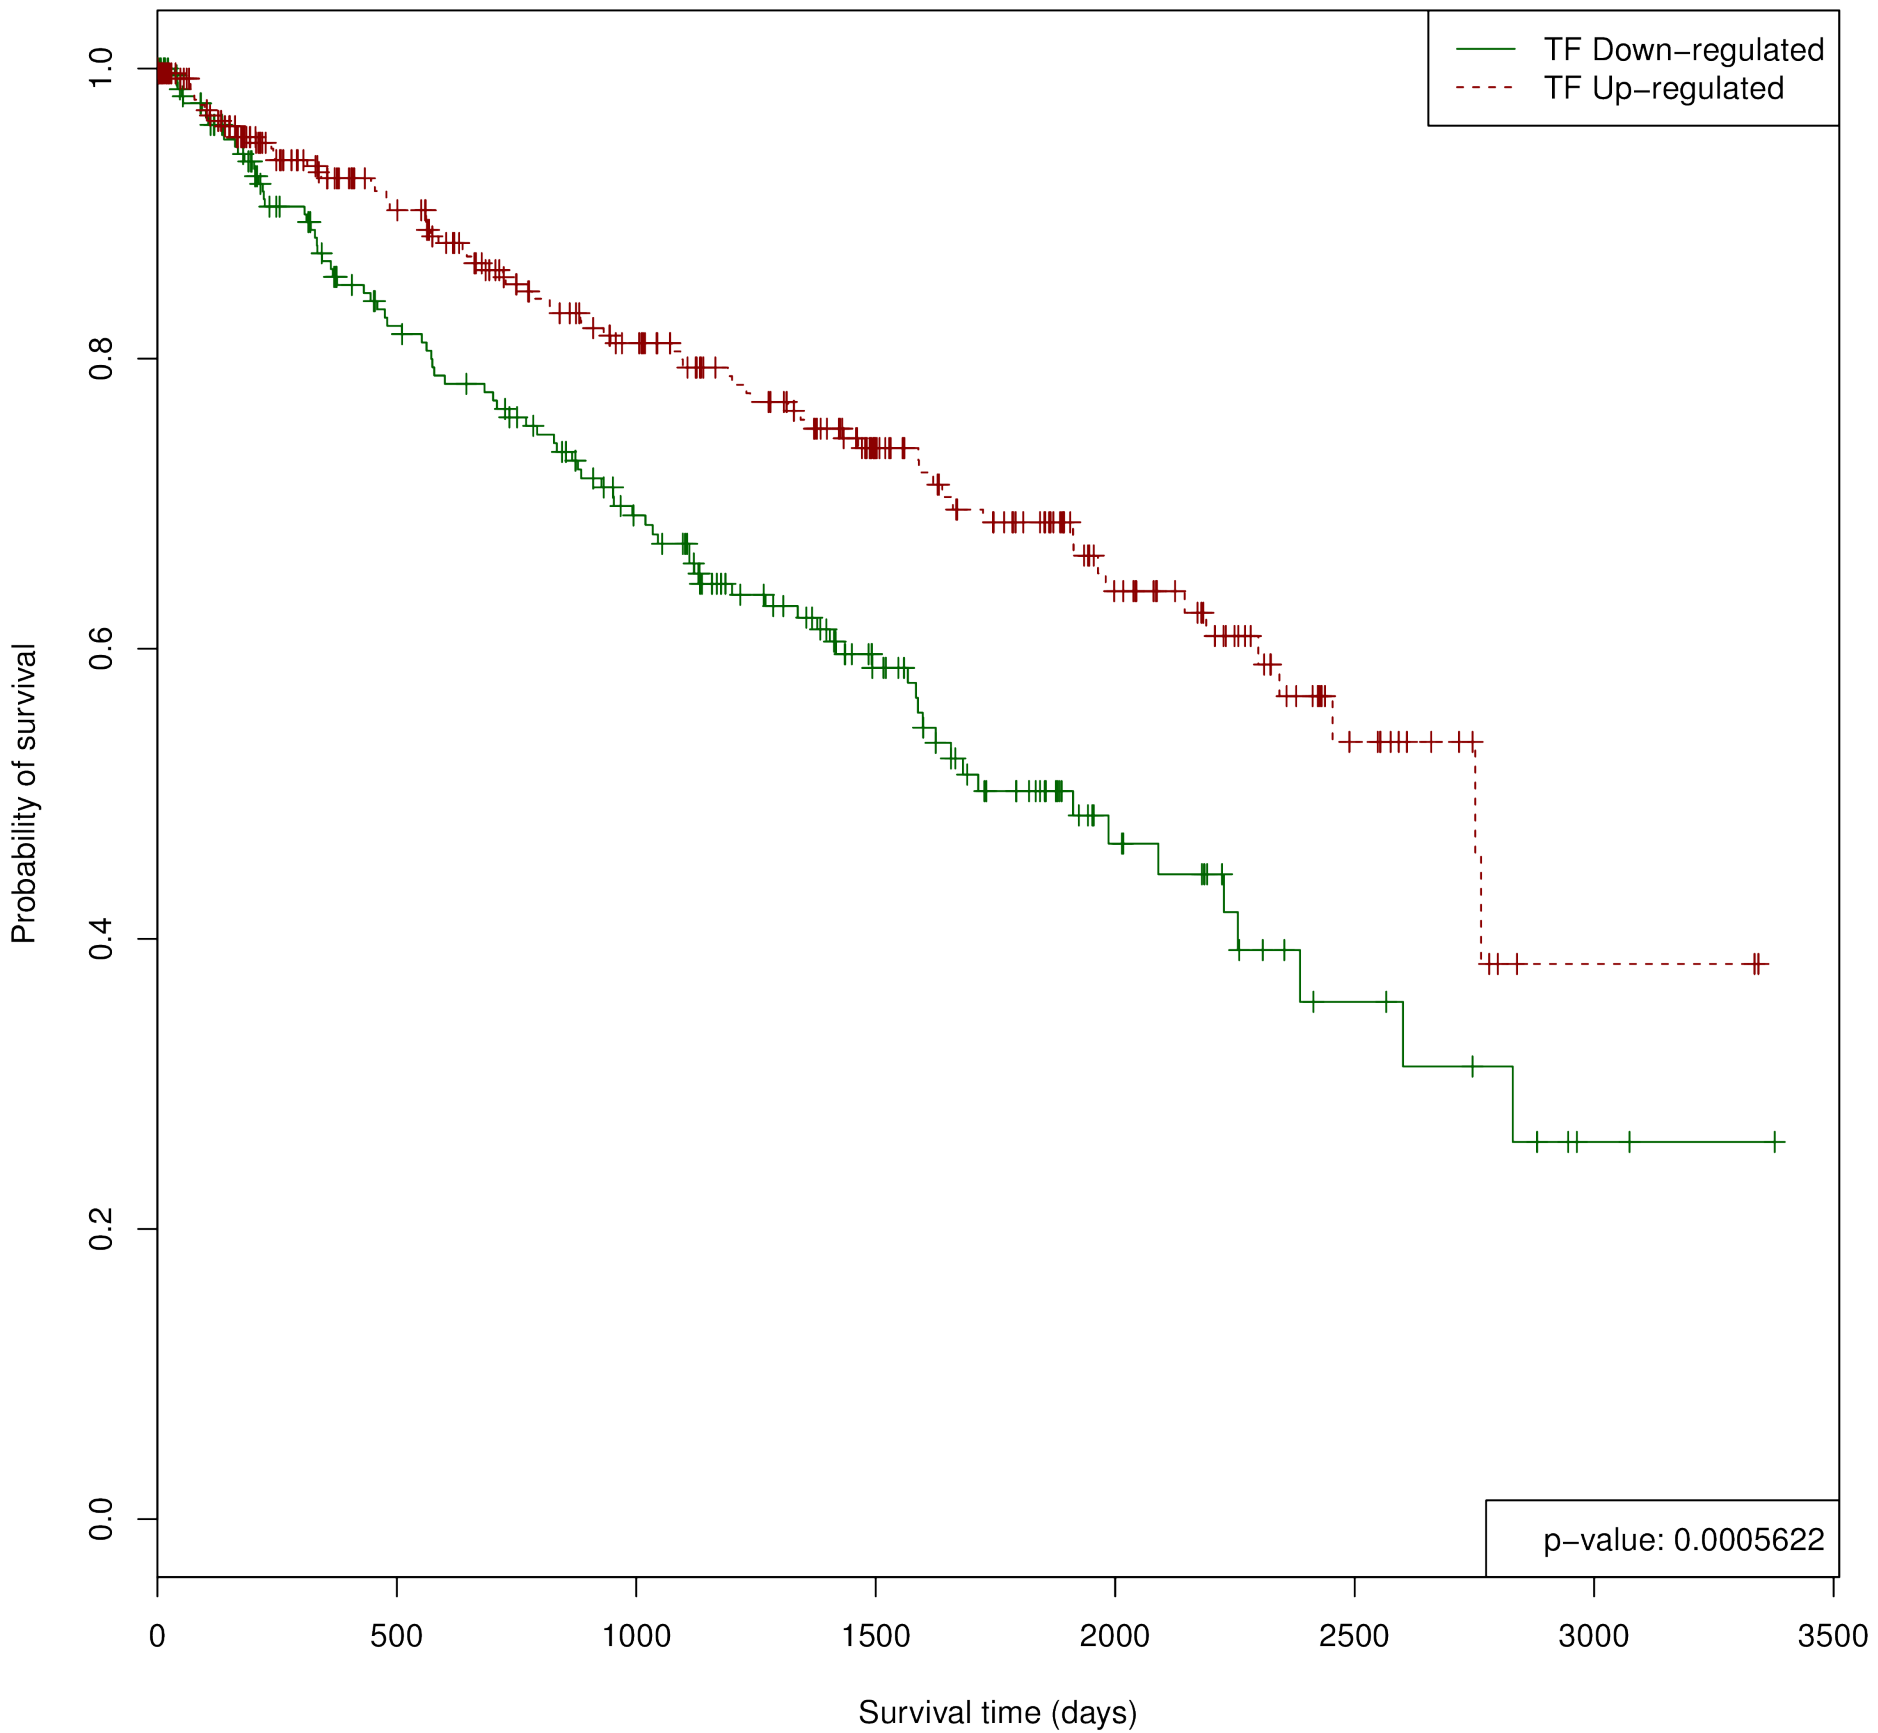

# JUND in LUAD

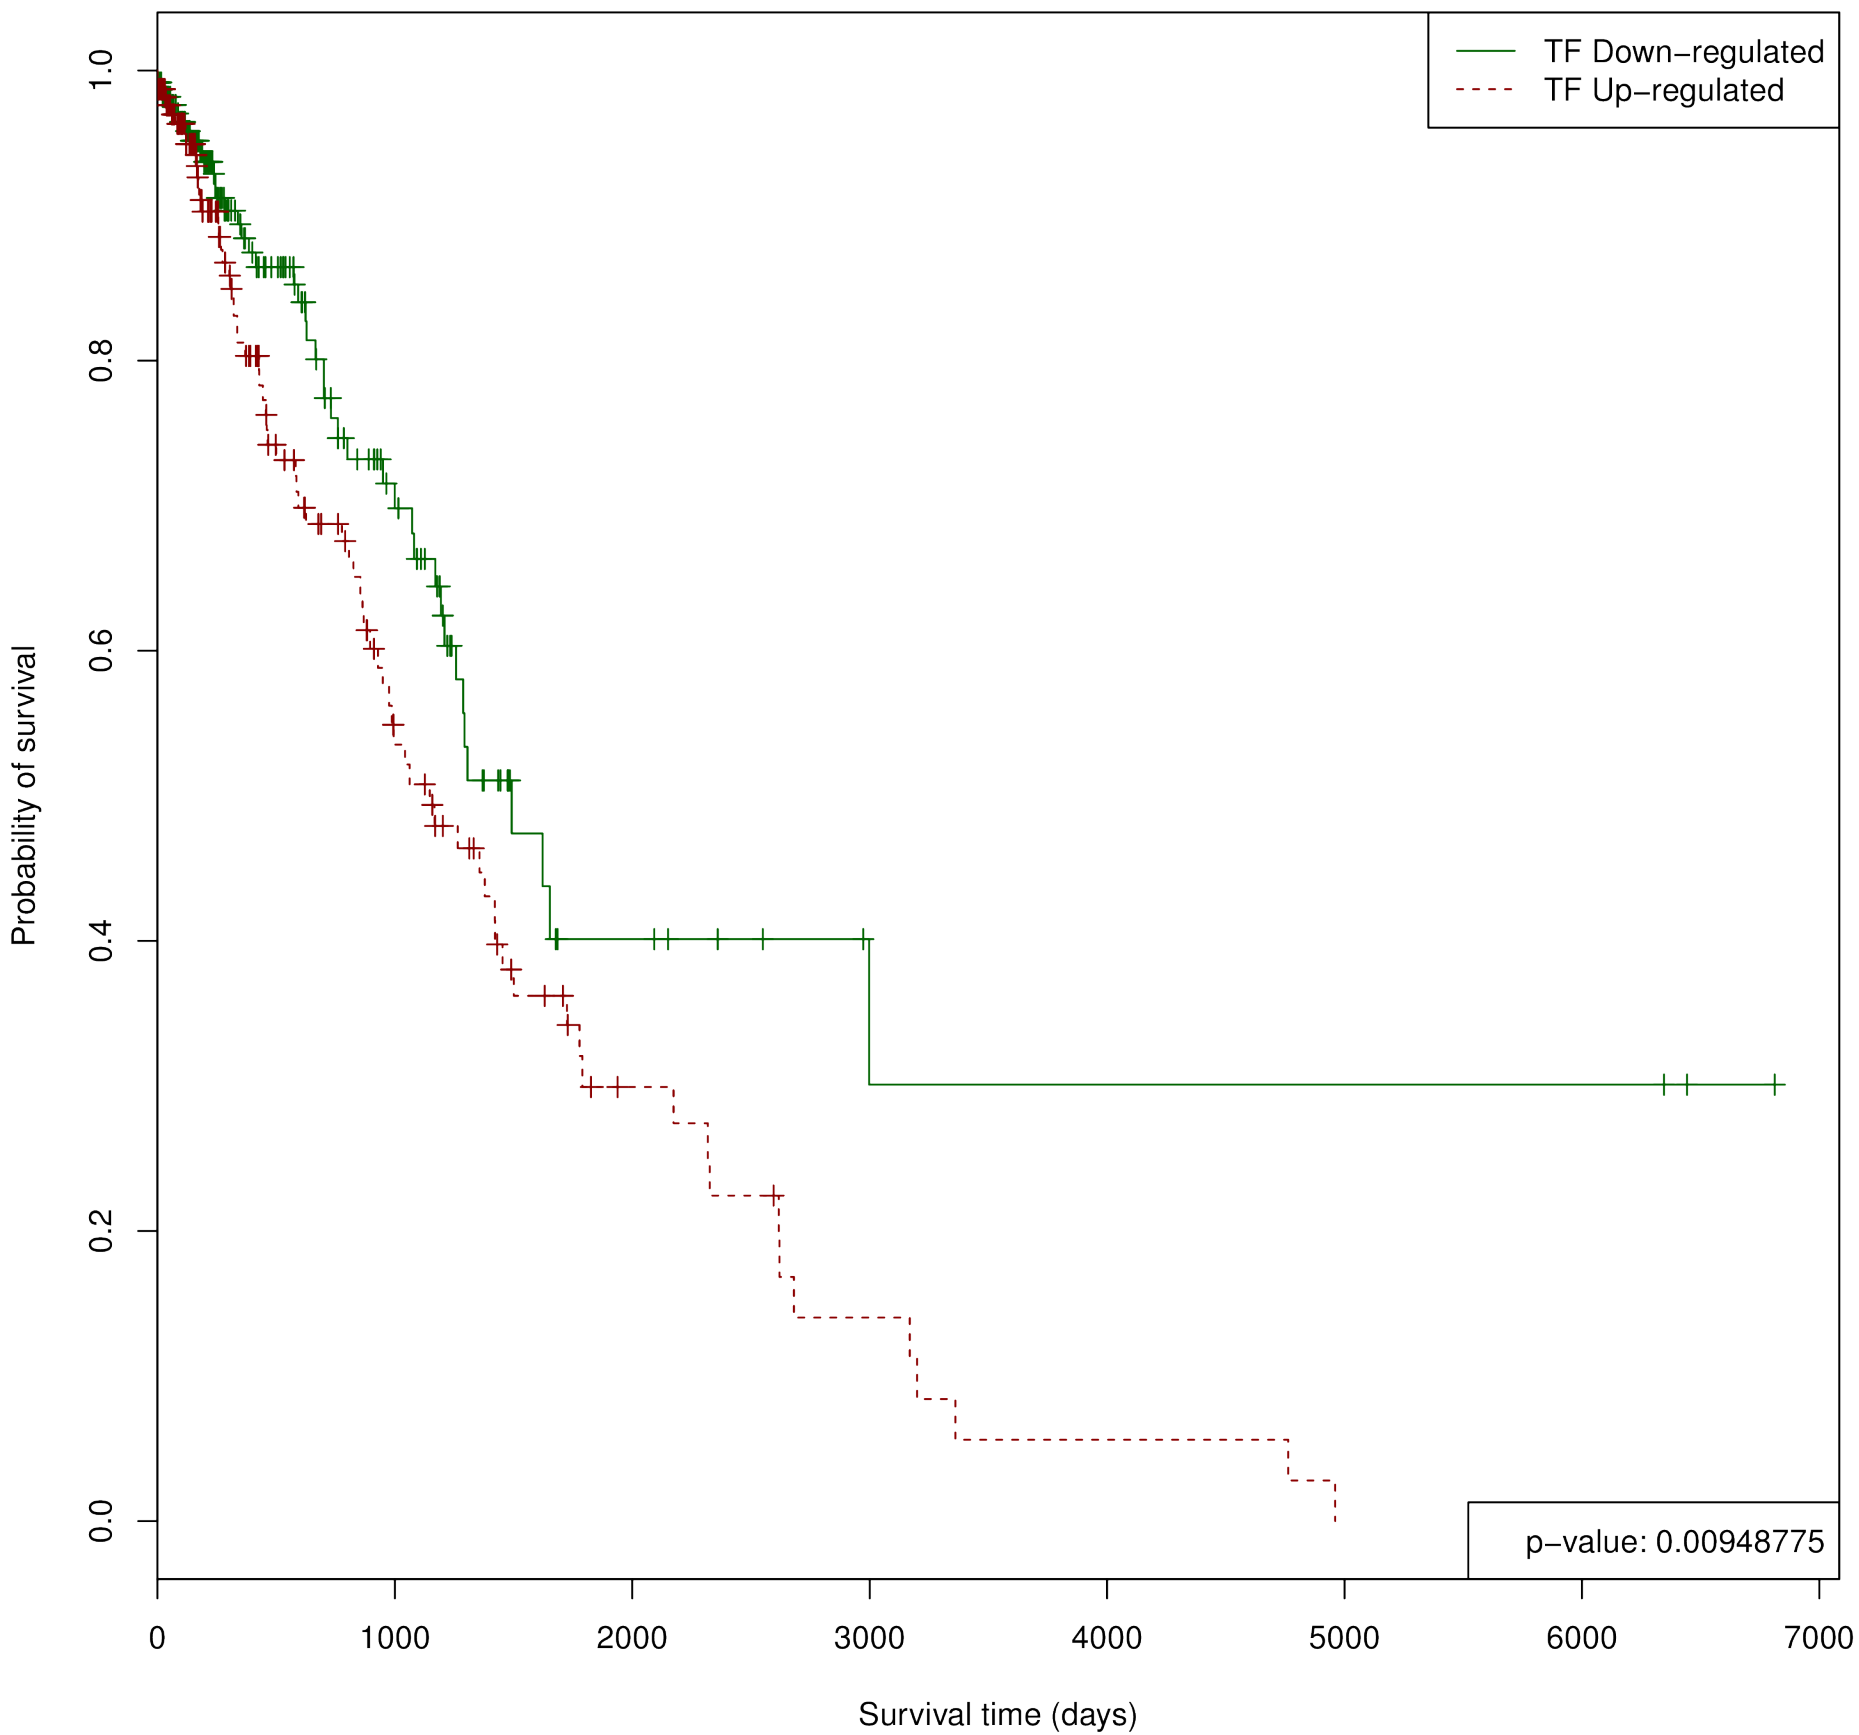

# JUN::FOS in HNSC

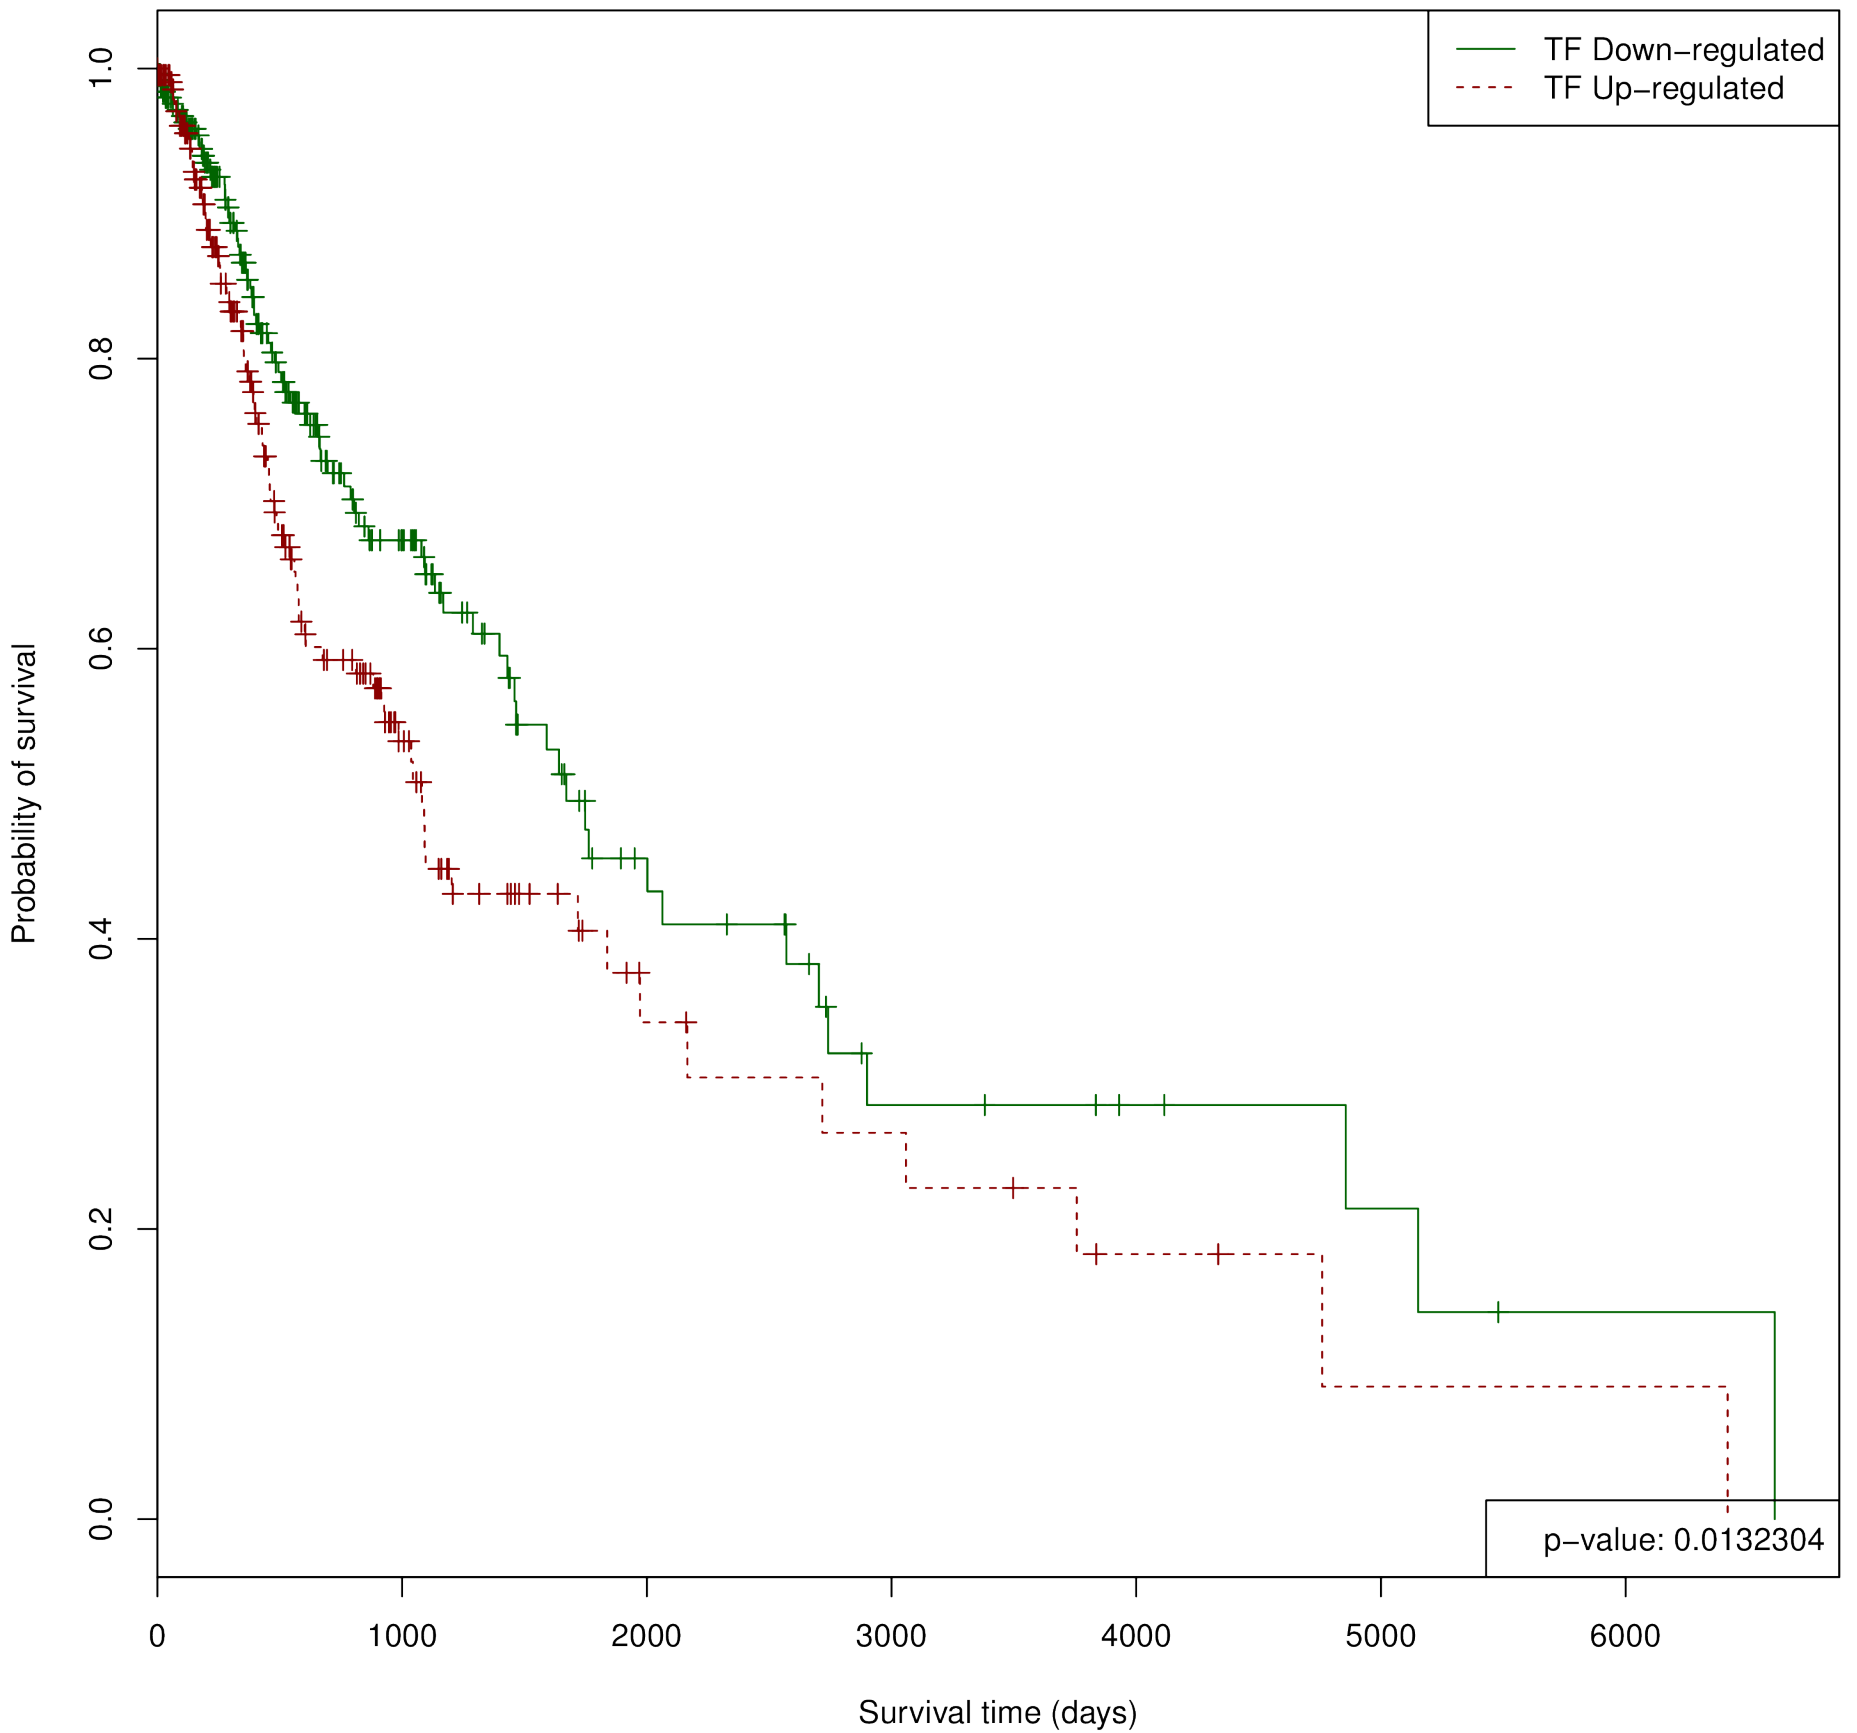

# JUN::FOS in KIRC

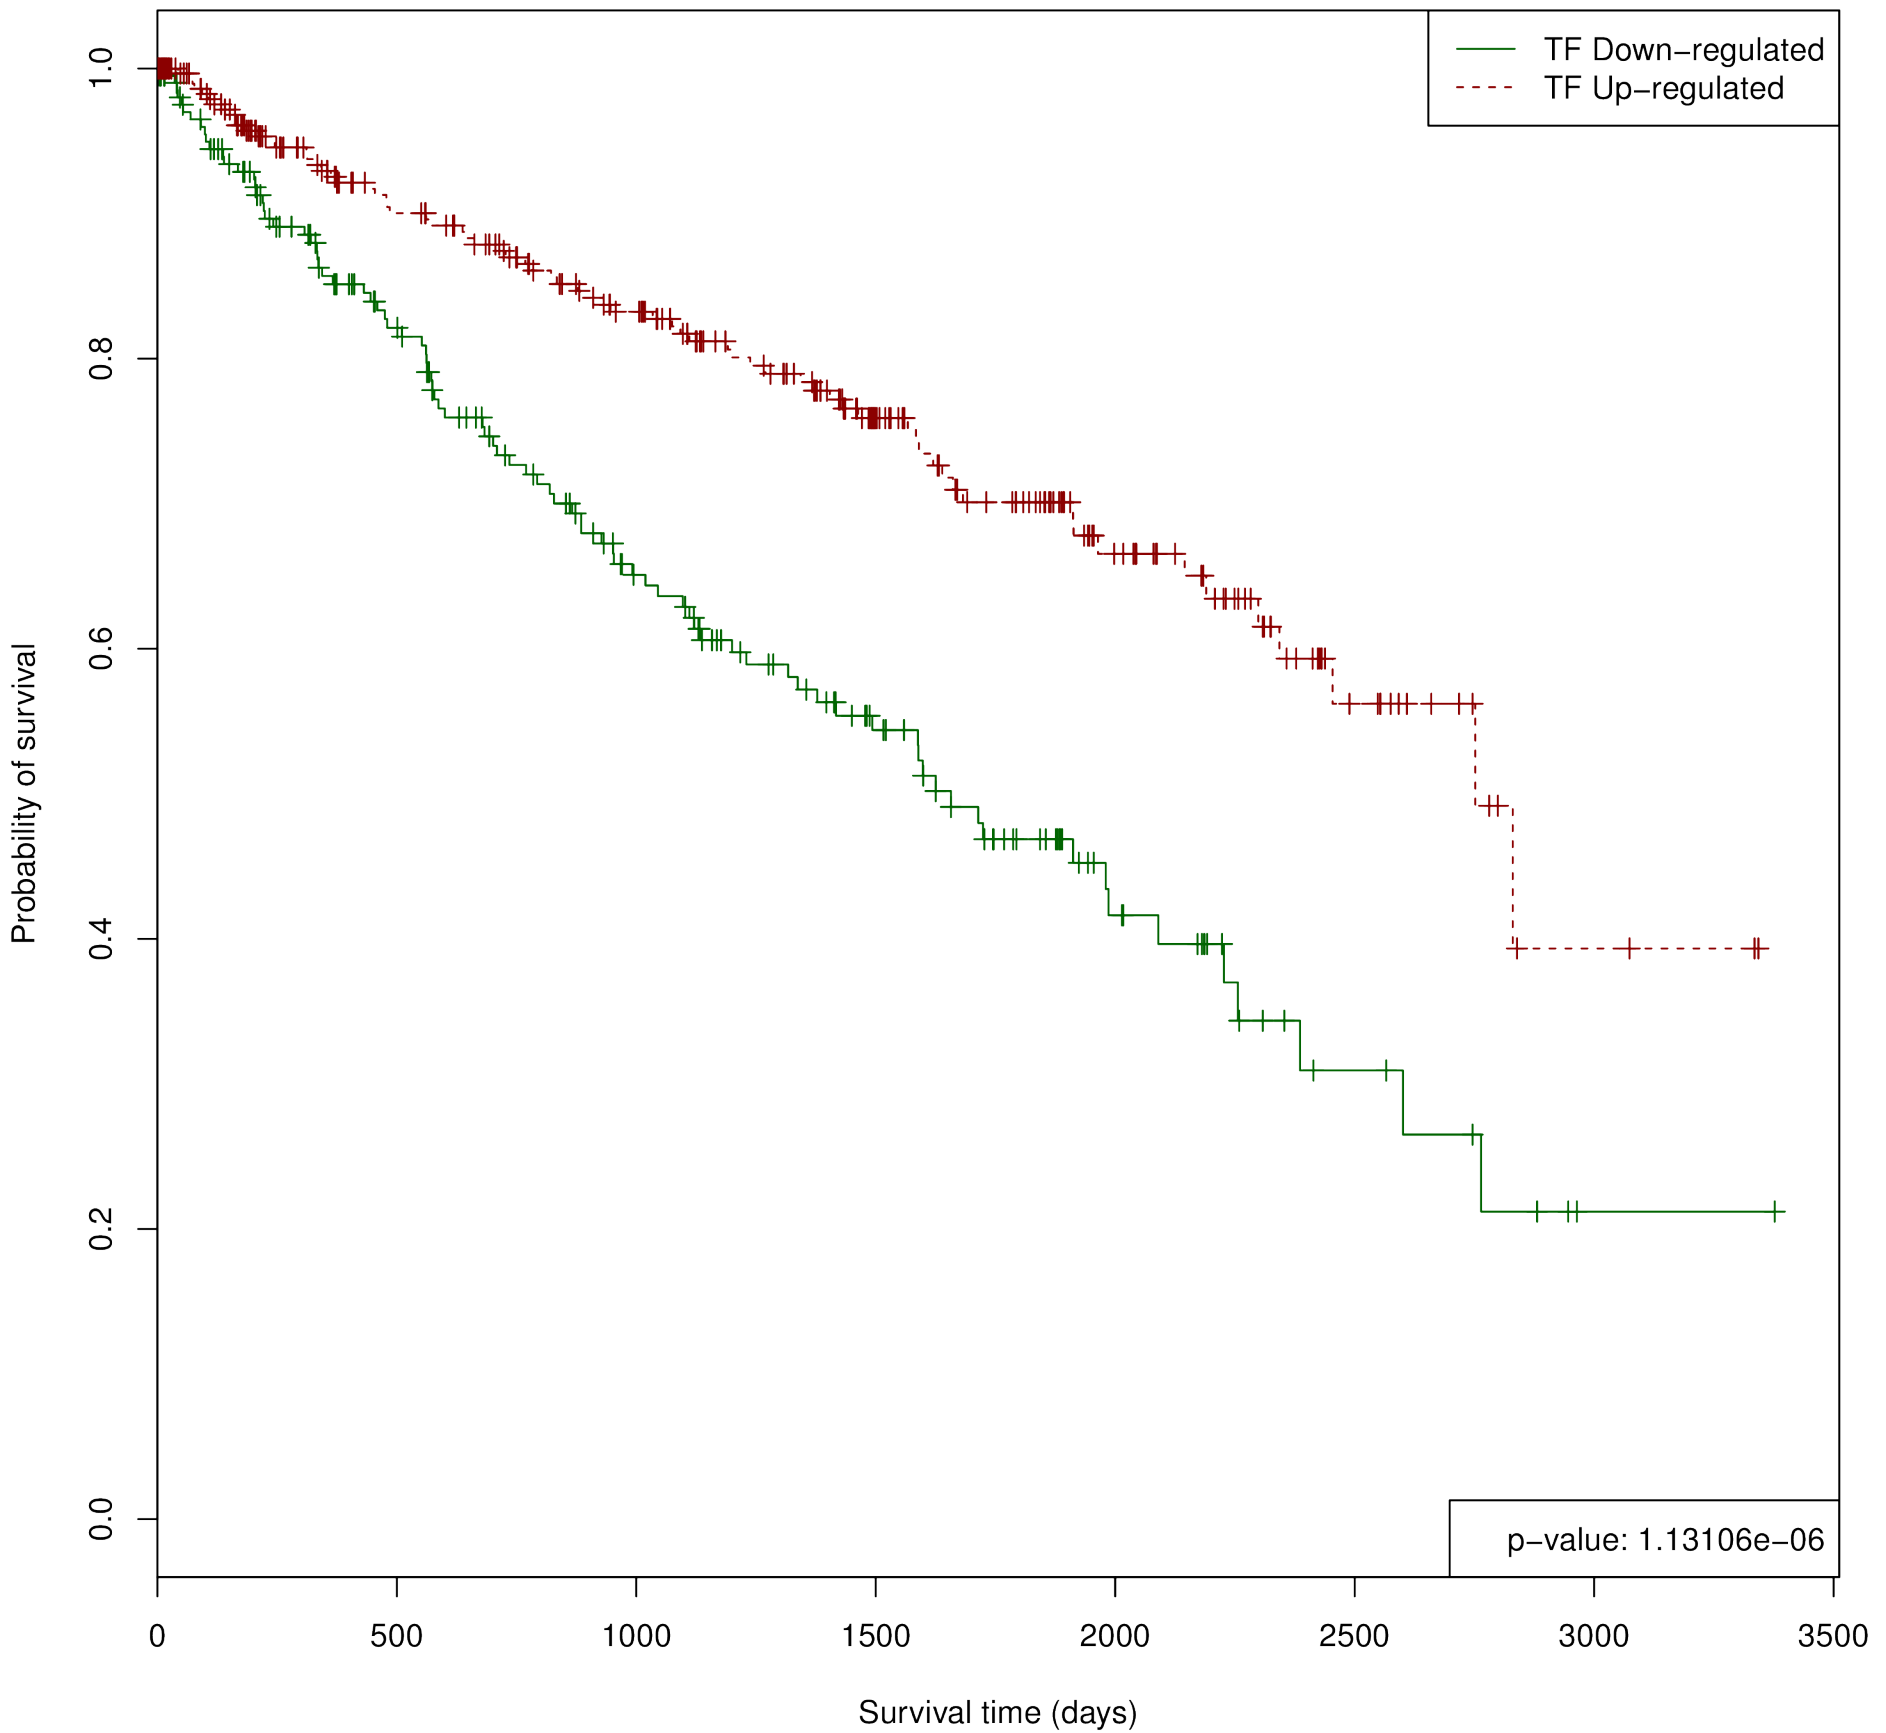

# JUN in HNSC

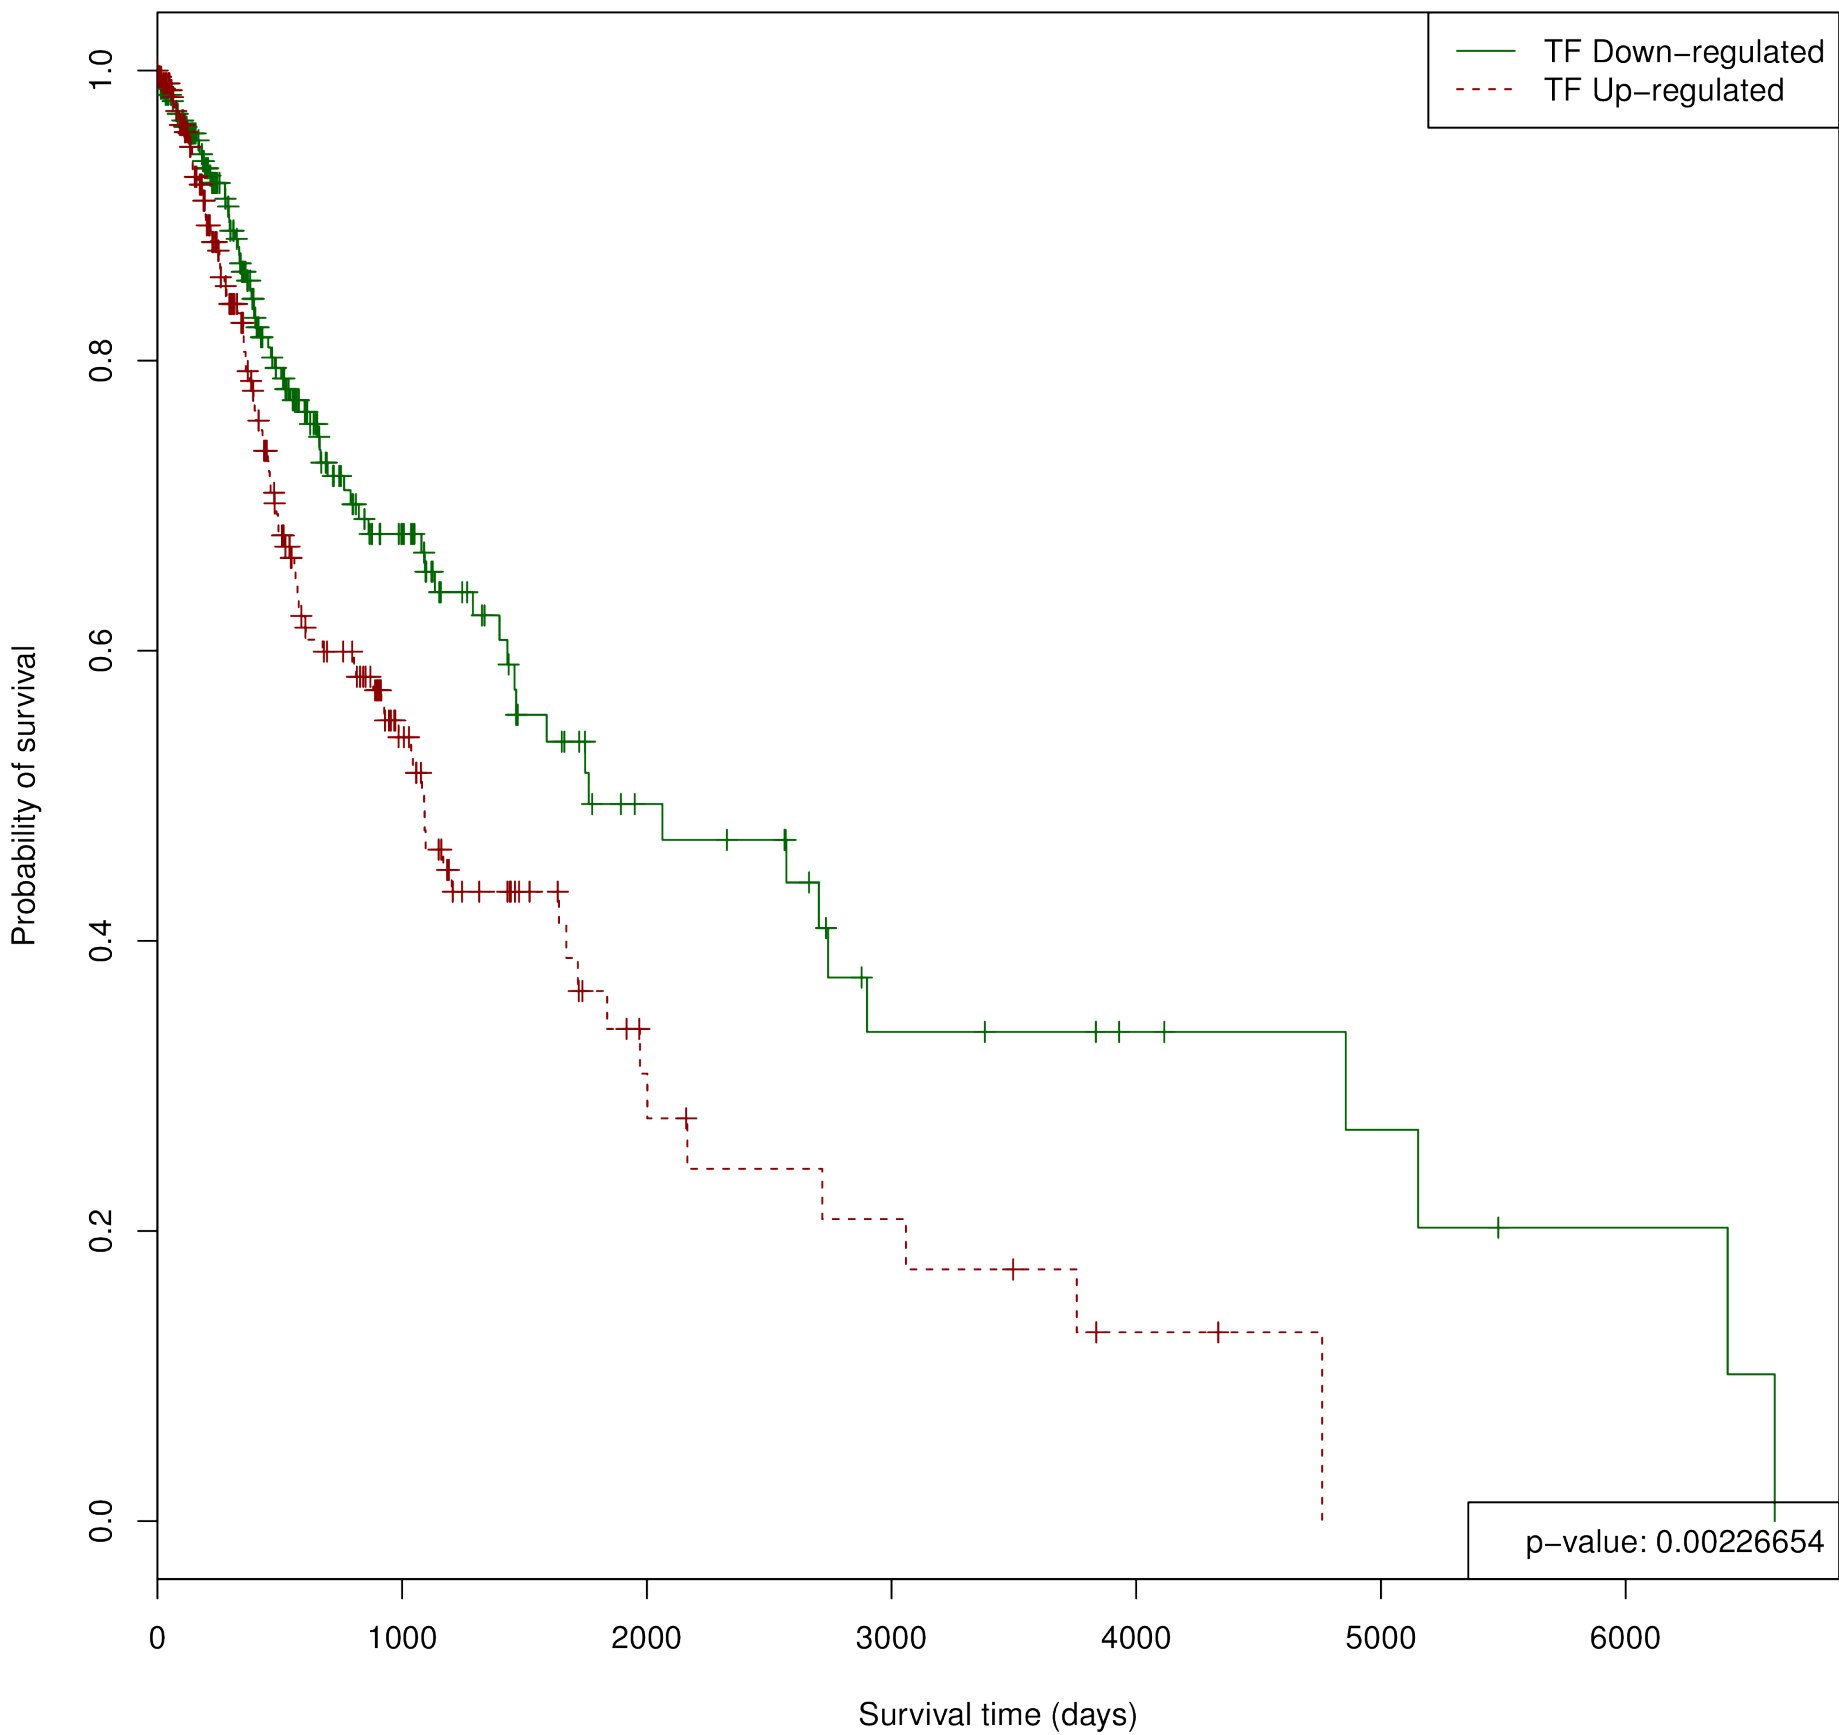

# JUN in KIRC

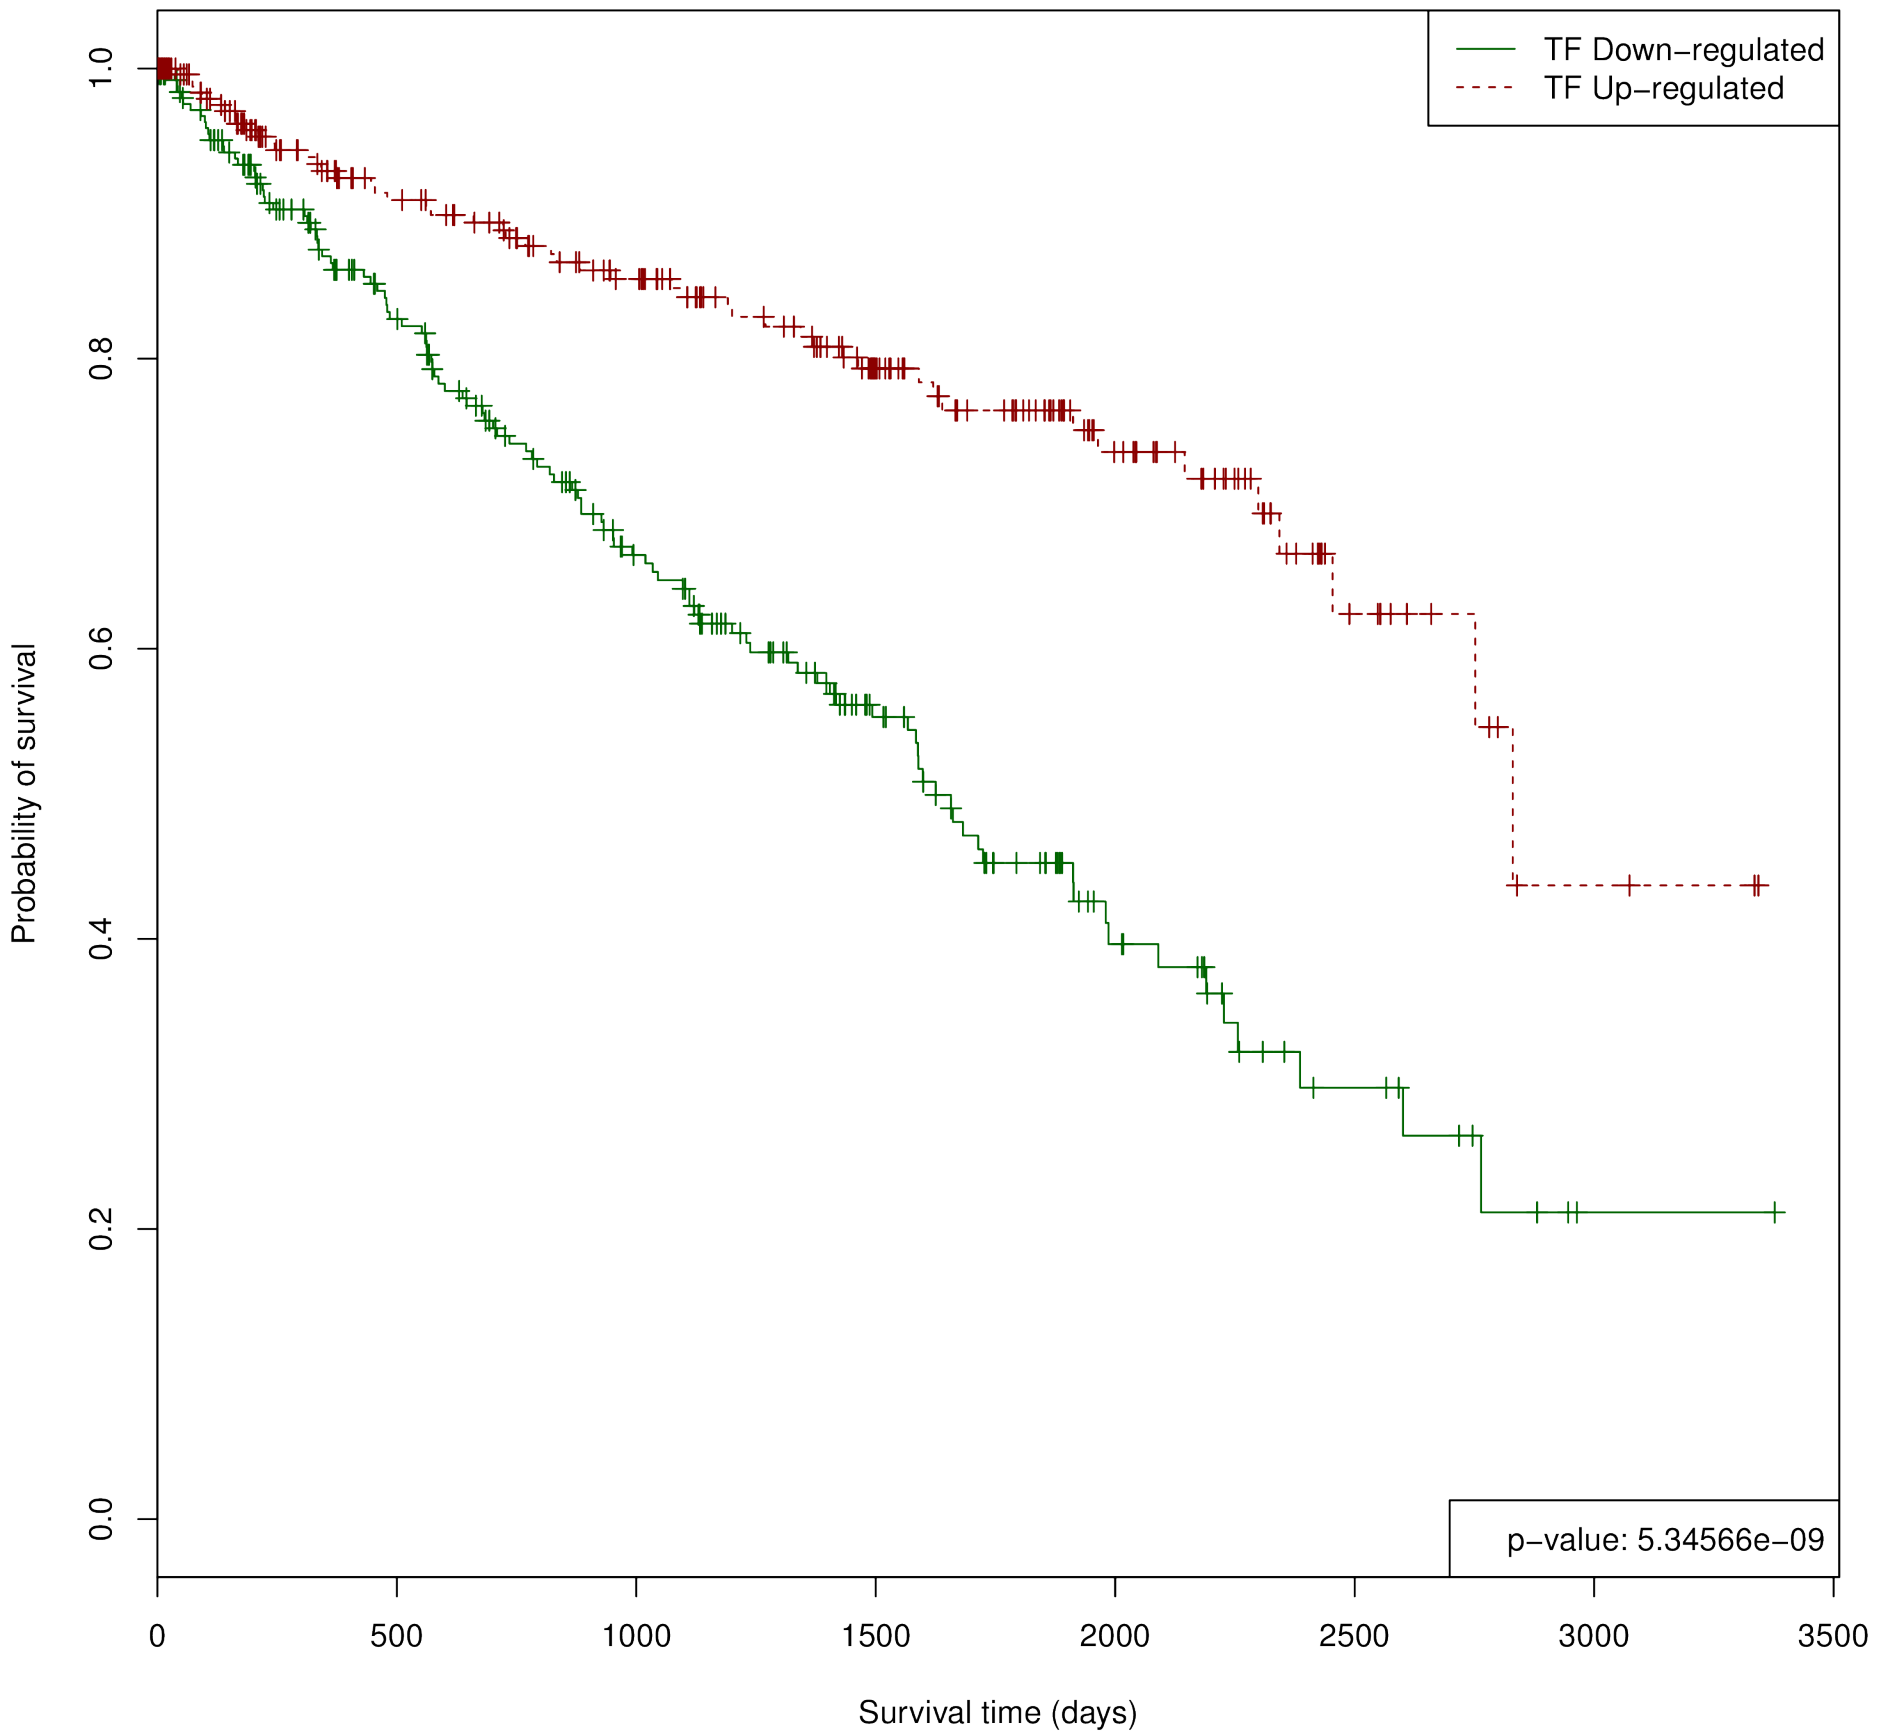

# MAX in COAD

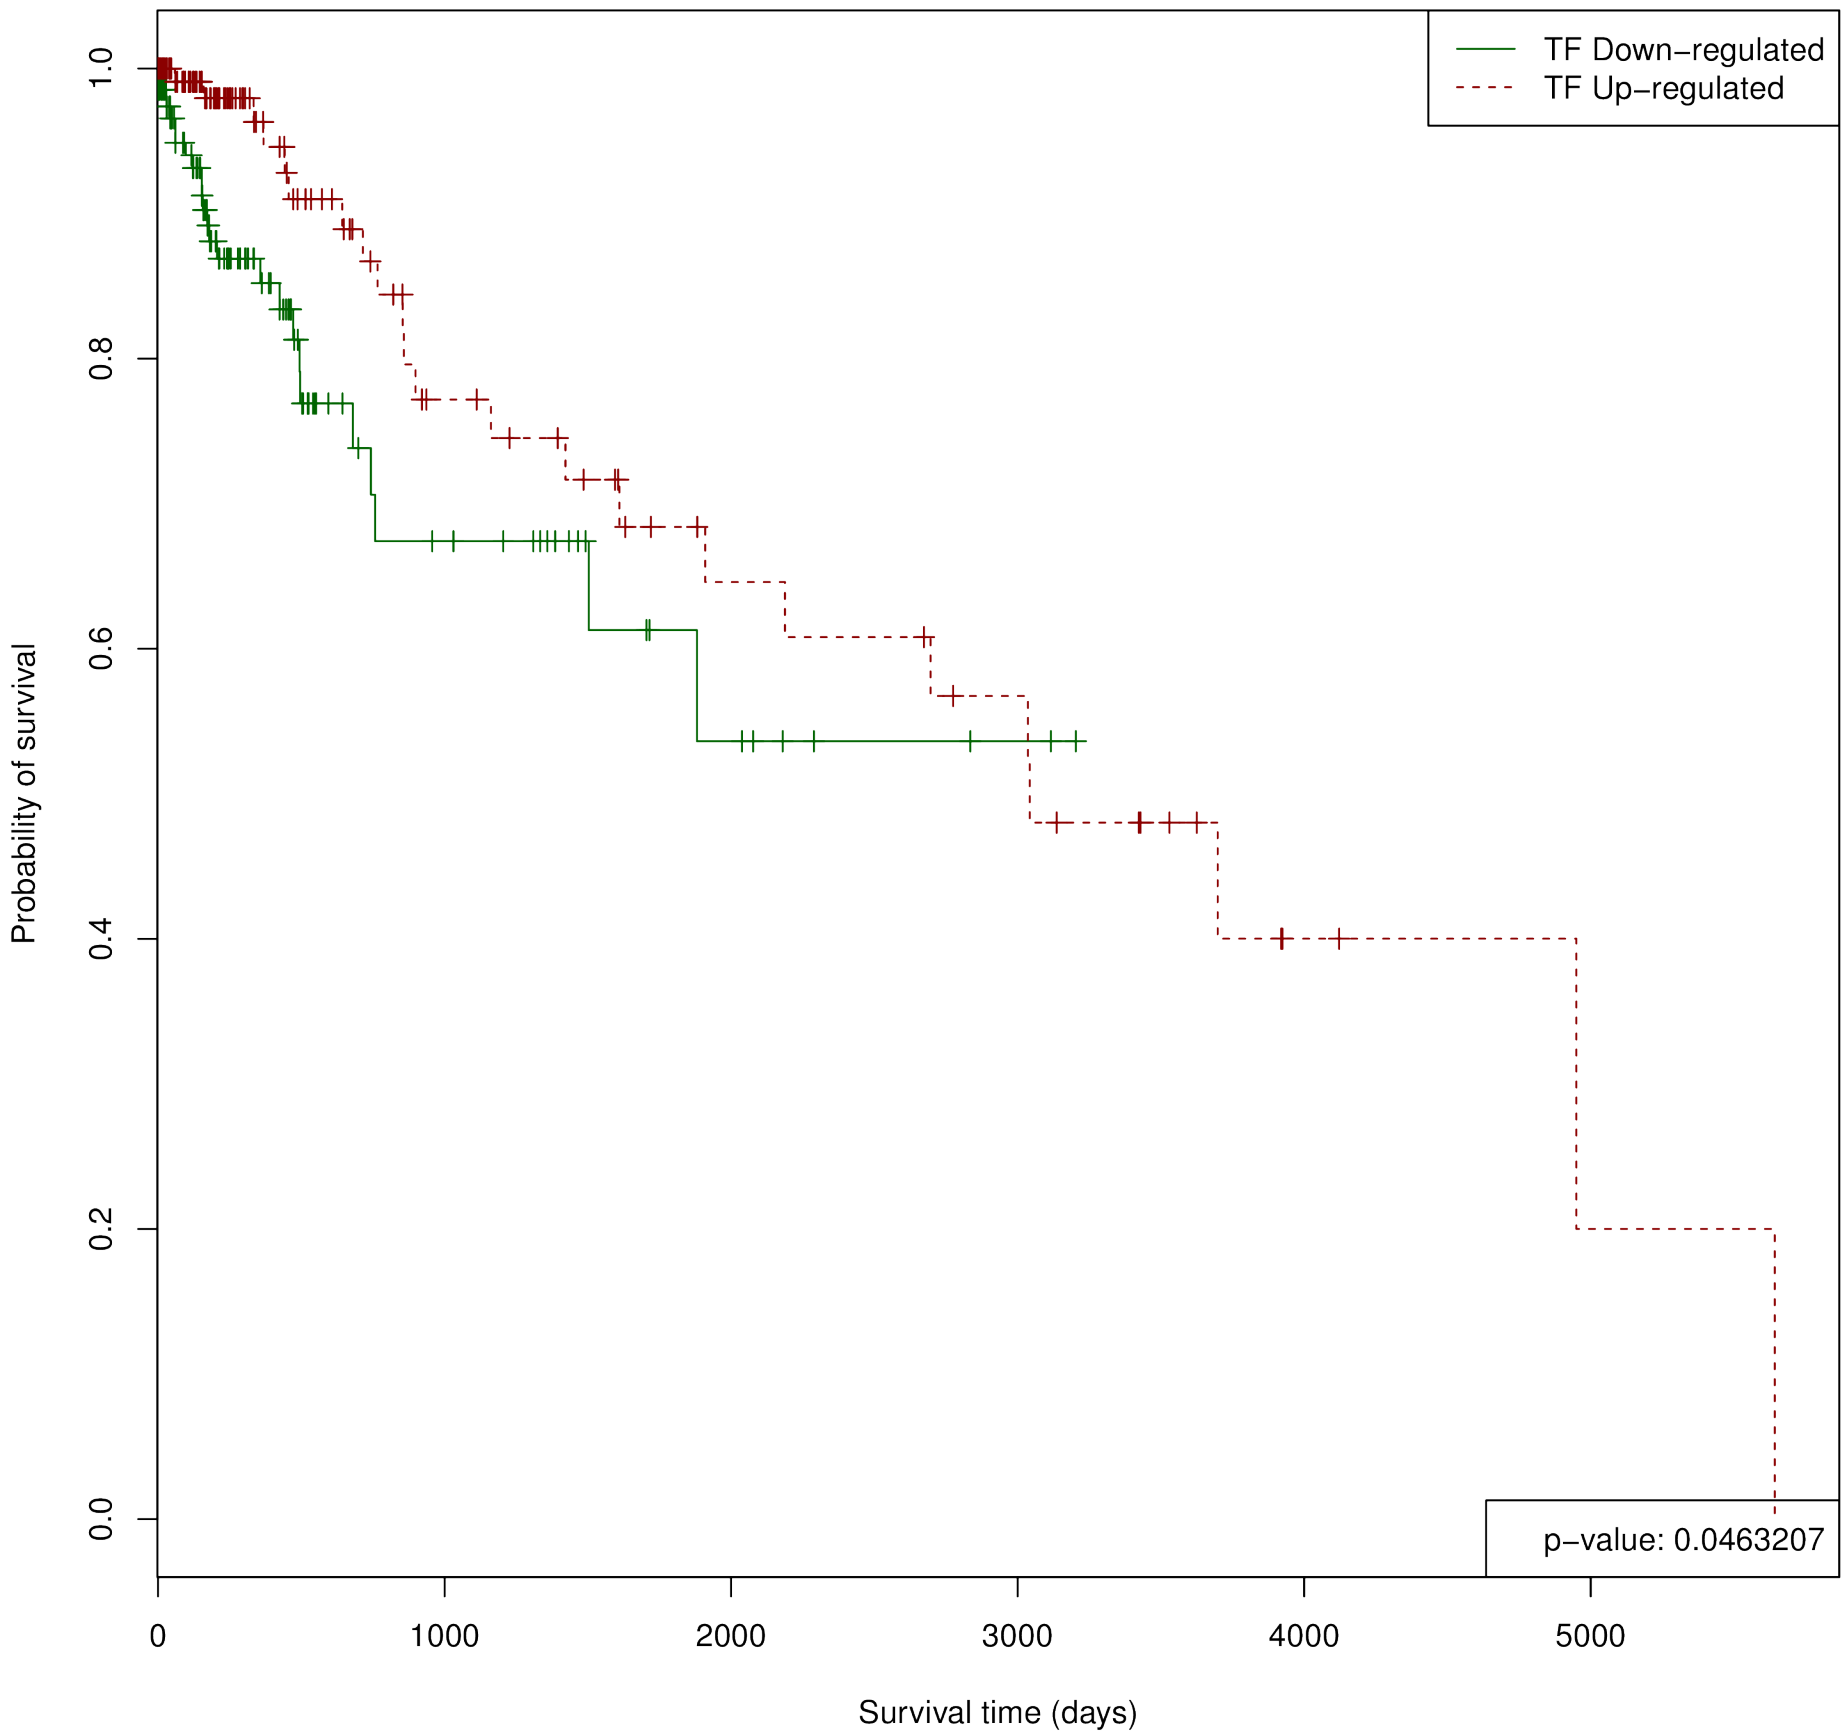

# MAX in KIRC

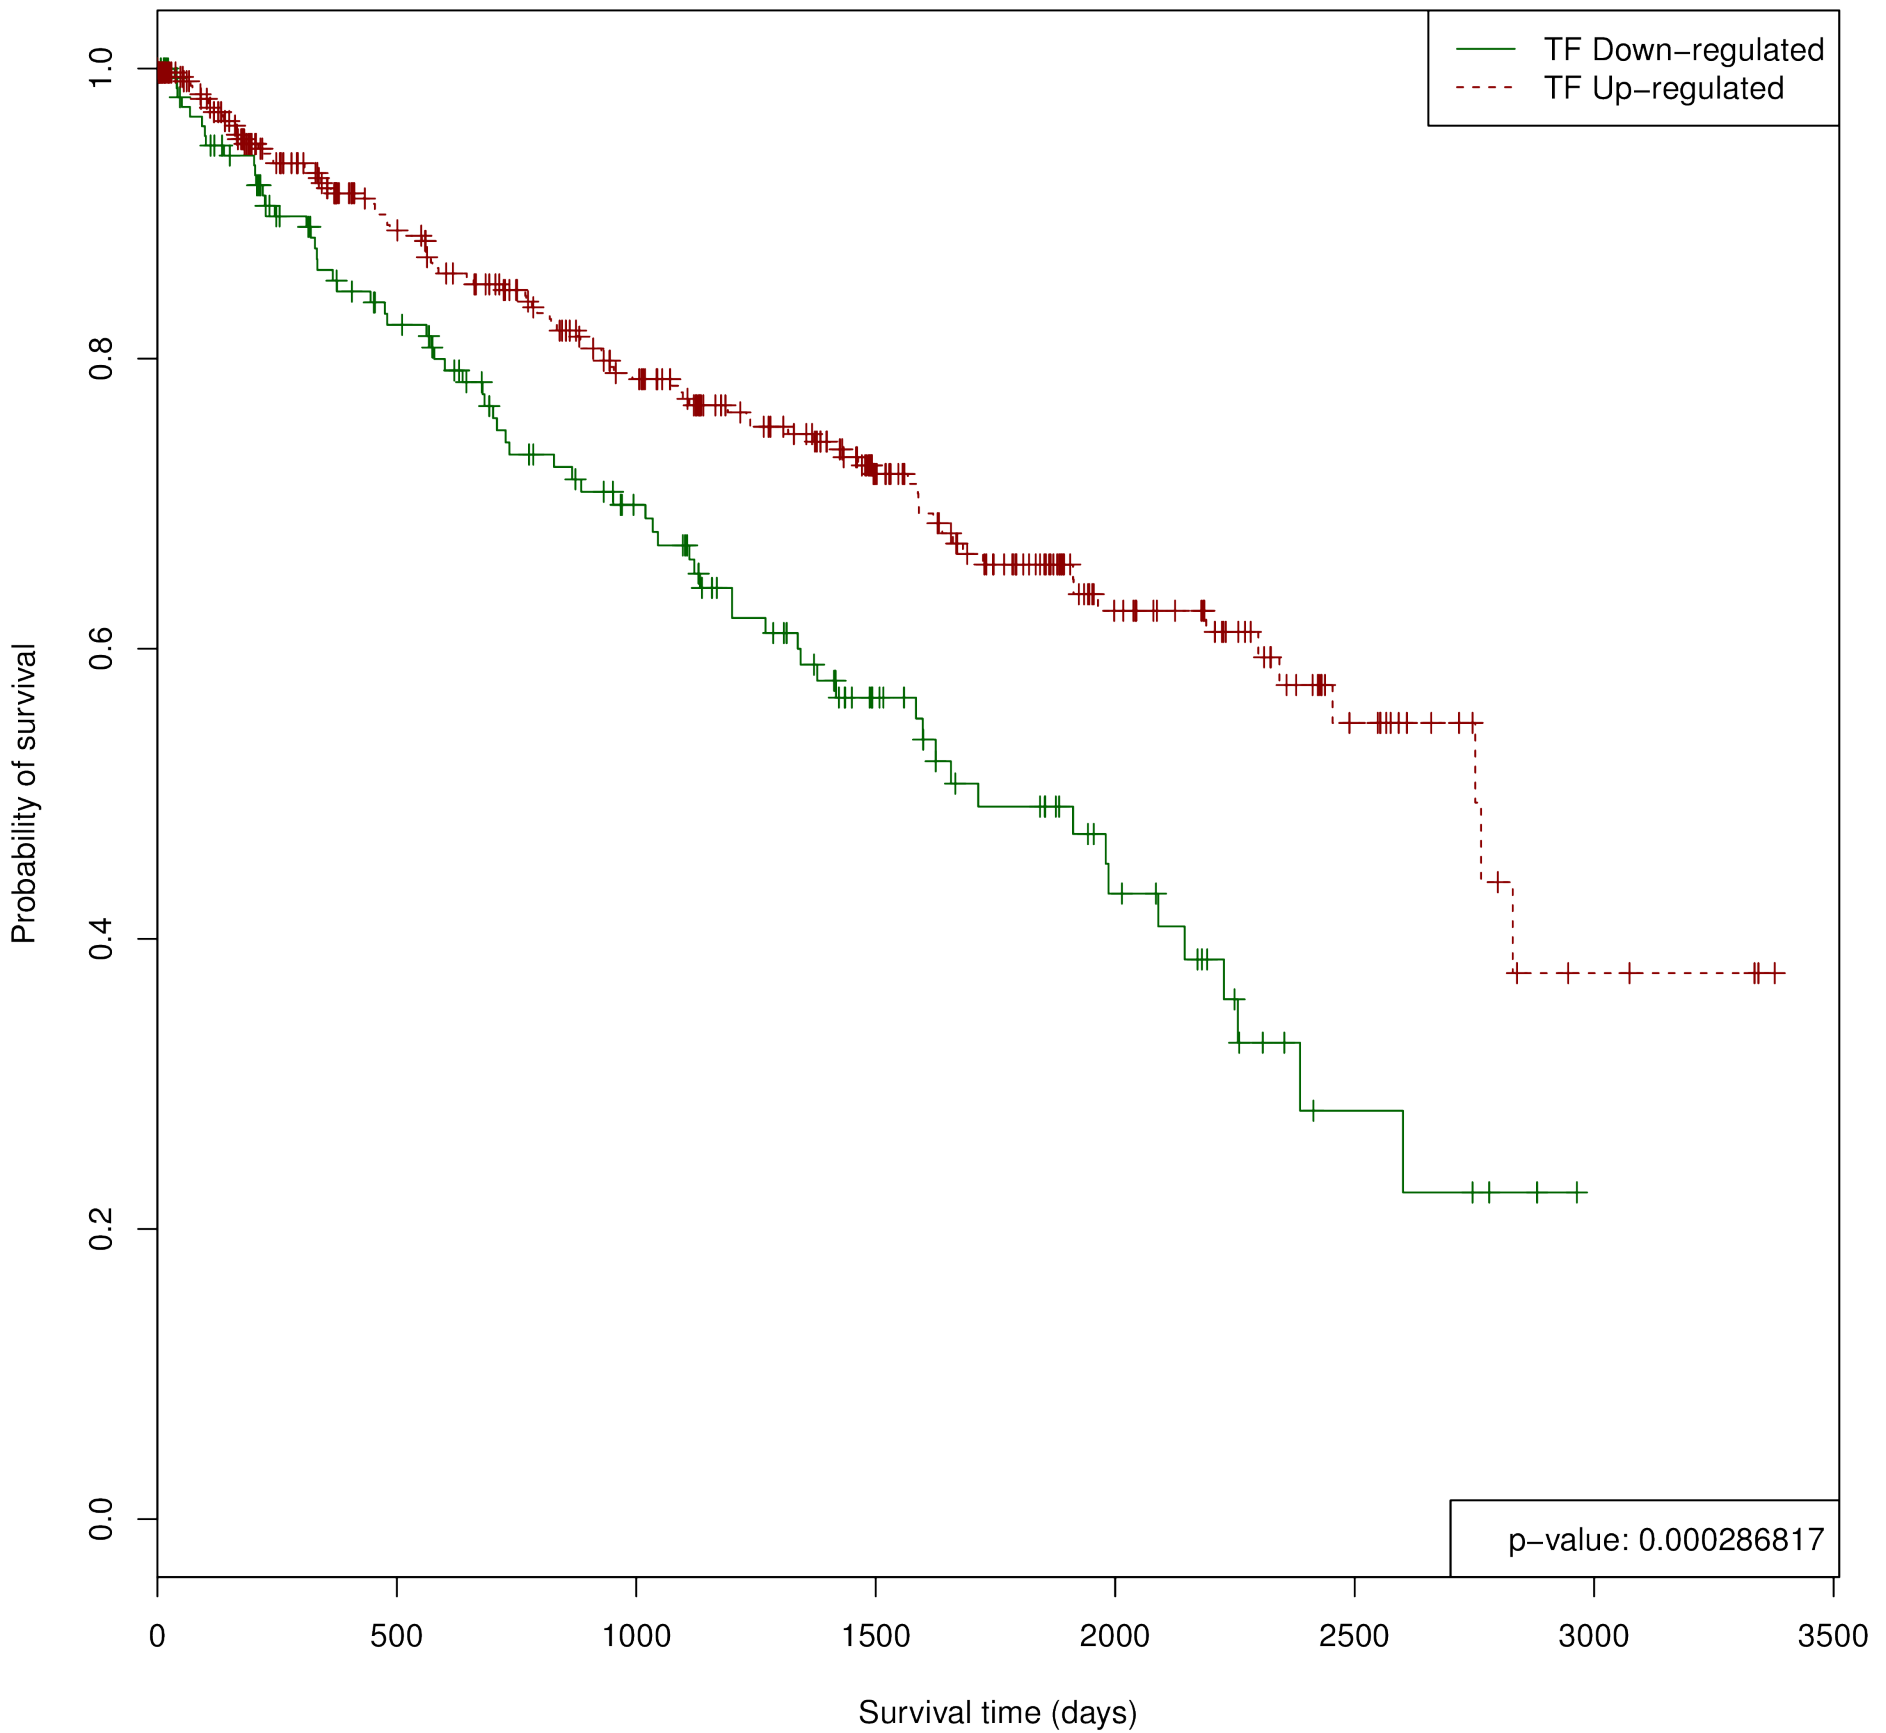



# MEF2A in KIRC

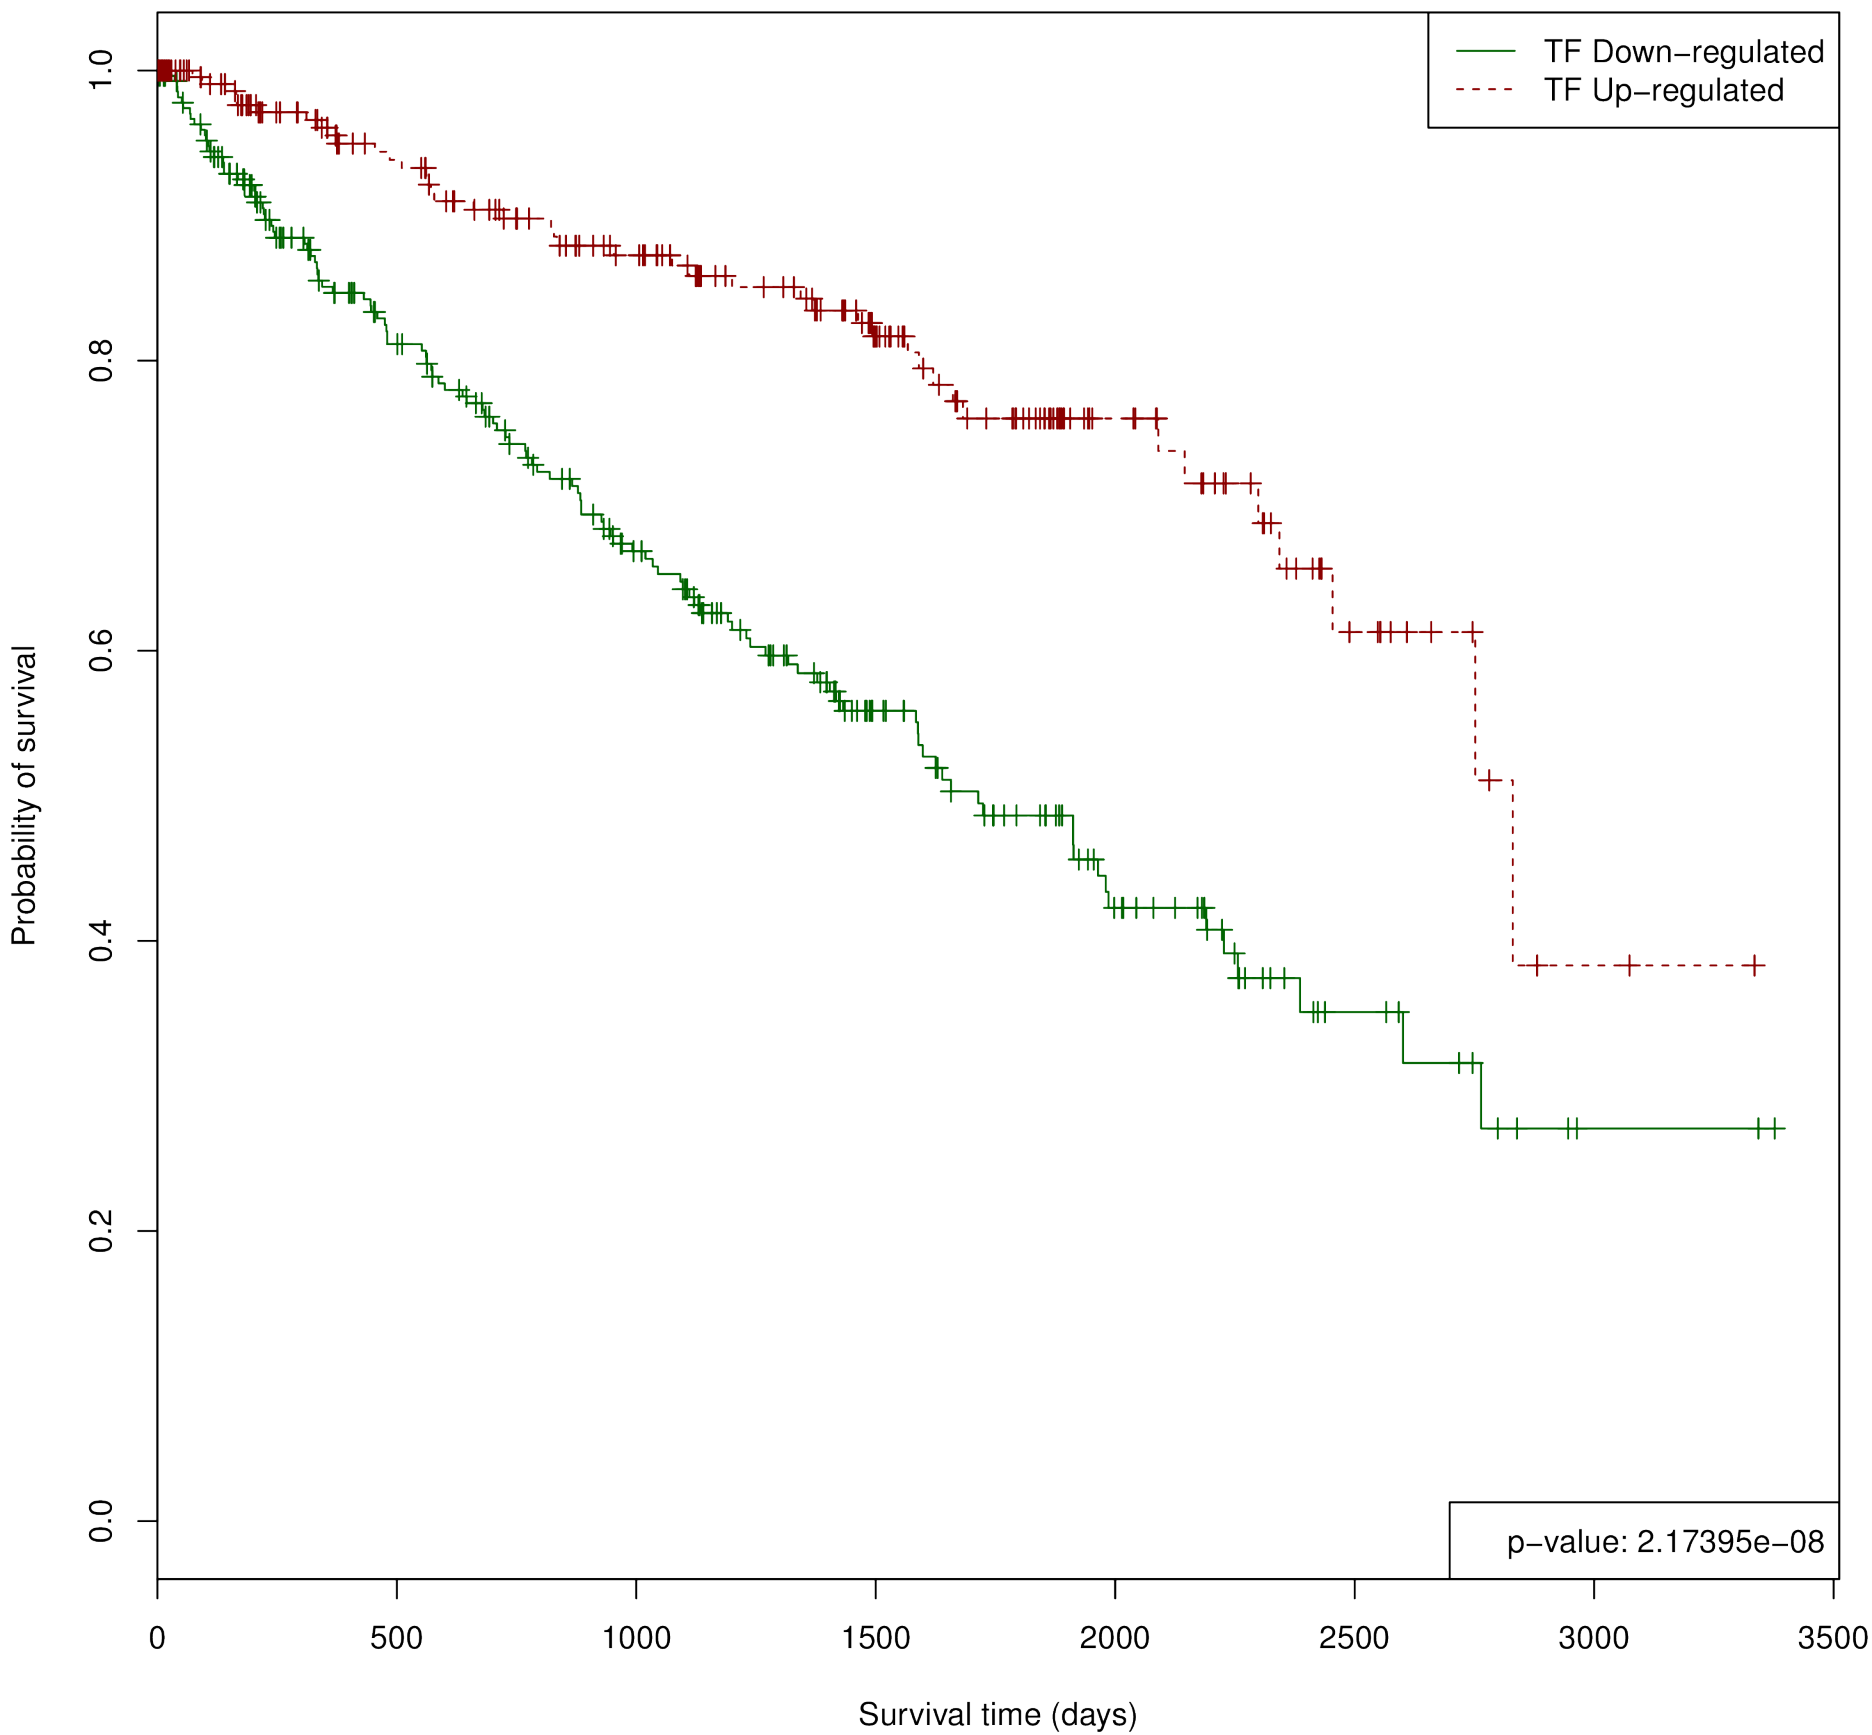

# MEF2C in BLCA

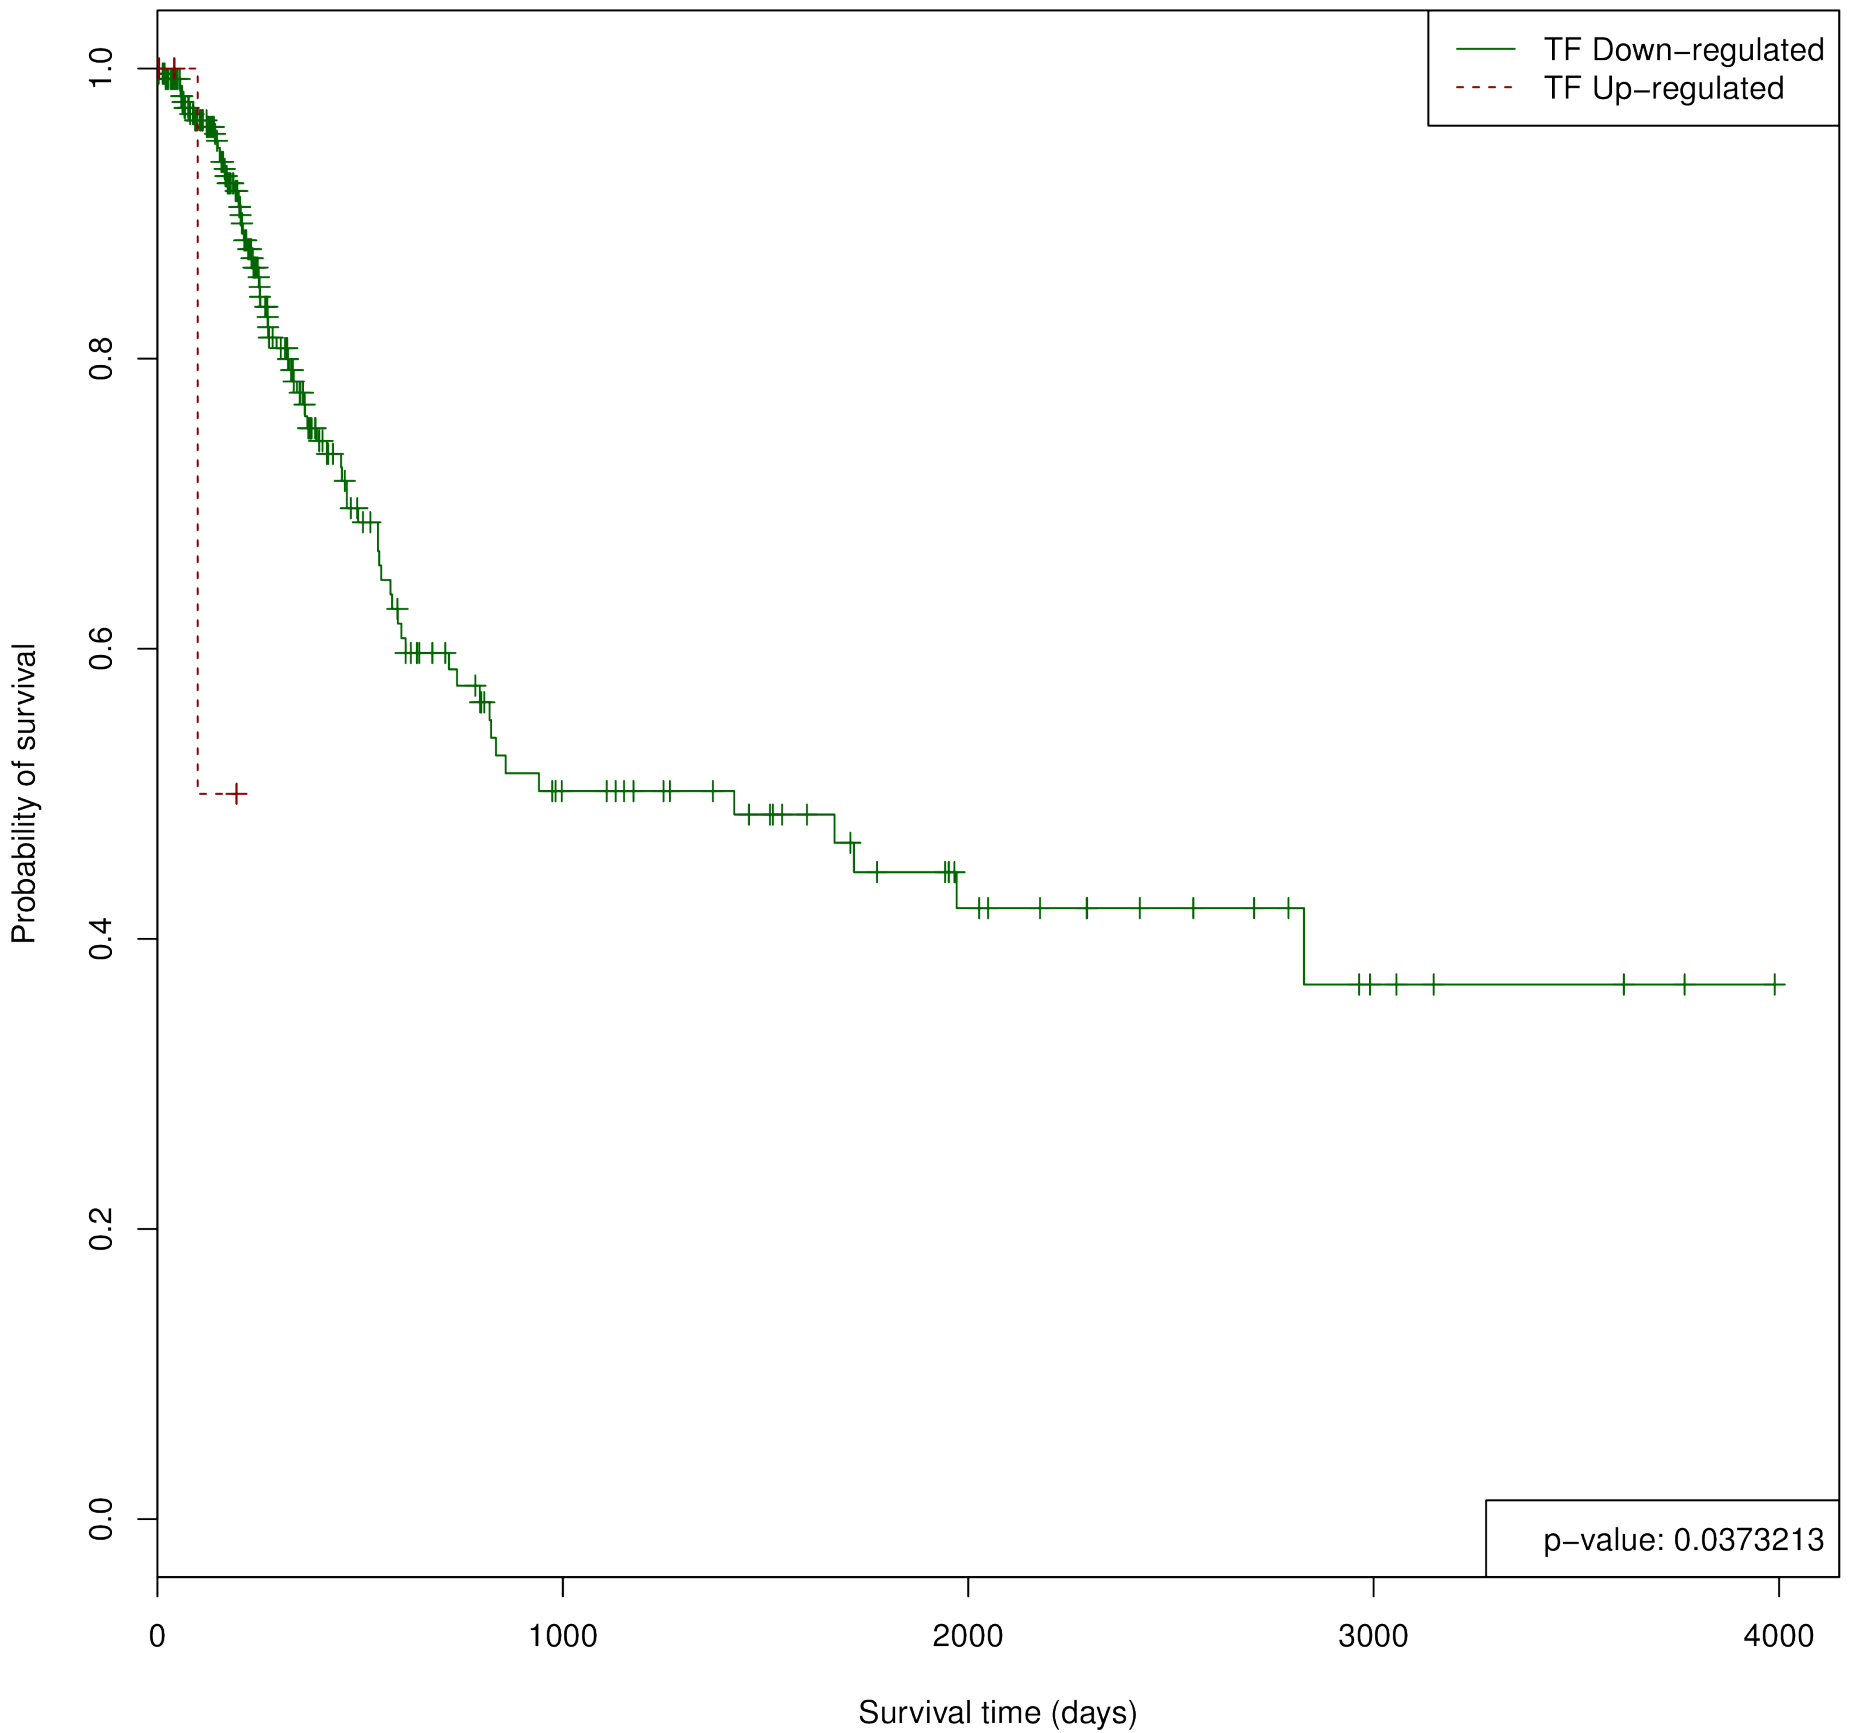

# MEF2C in KIRC

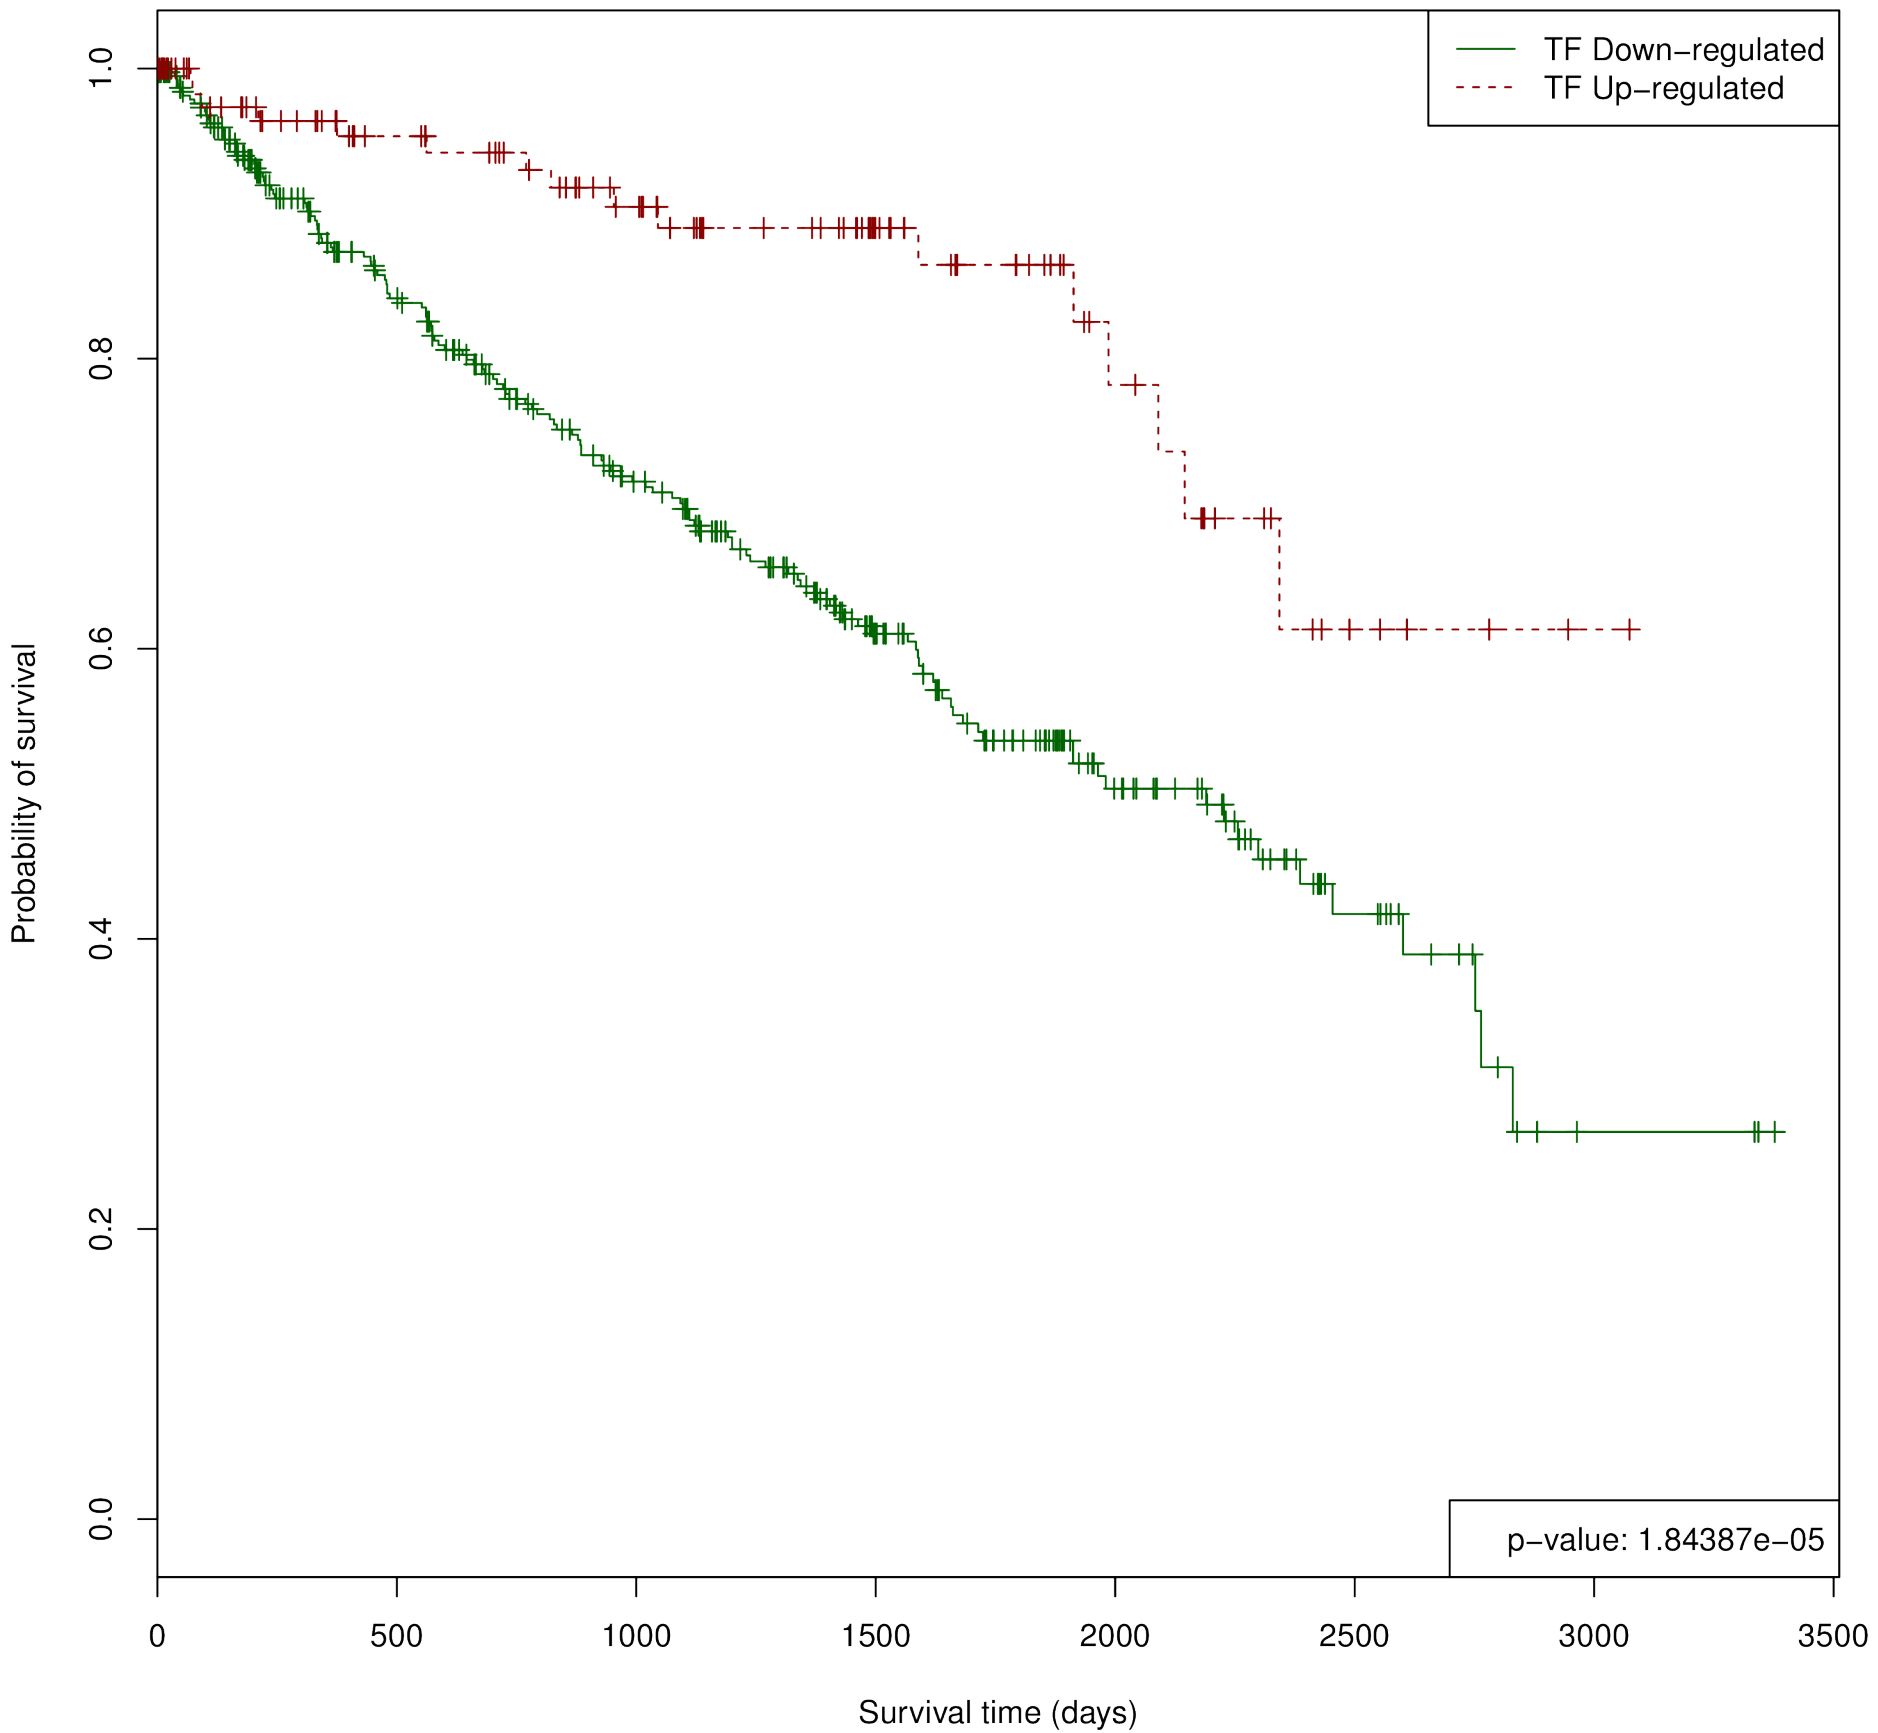

# MEF2C in LUAD

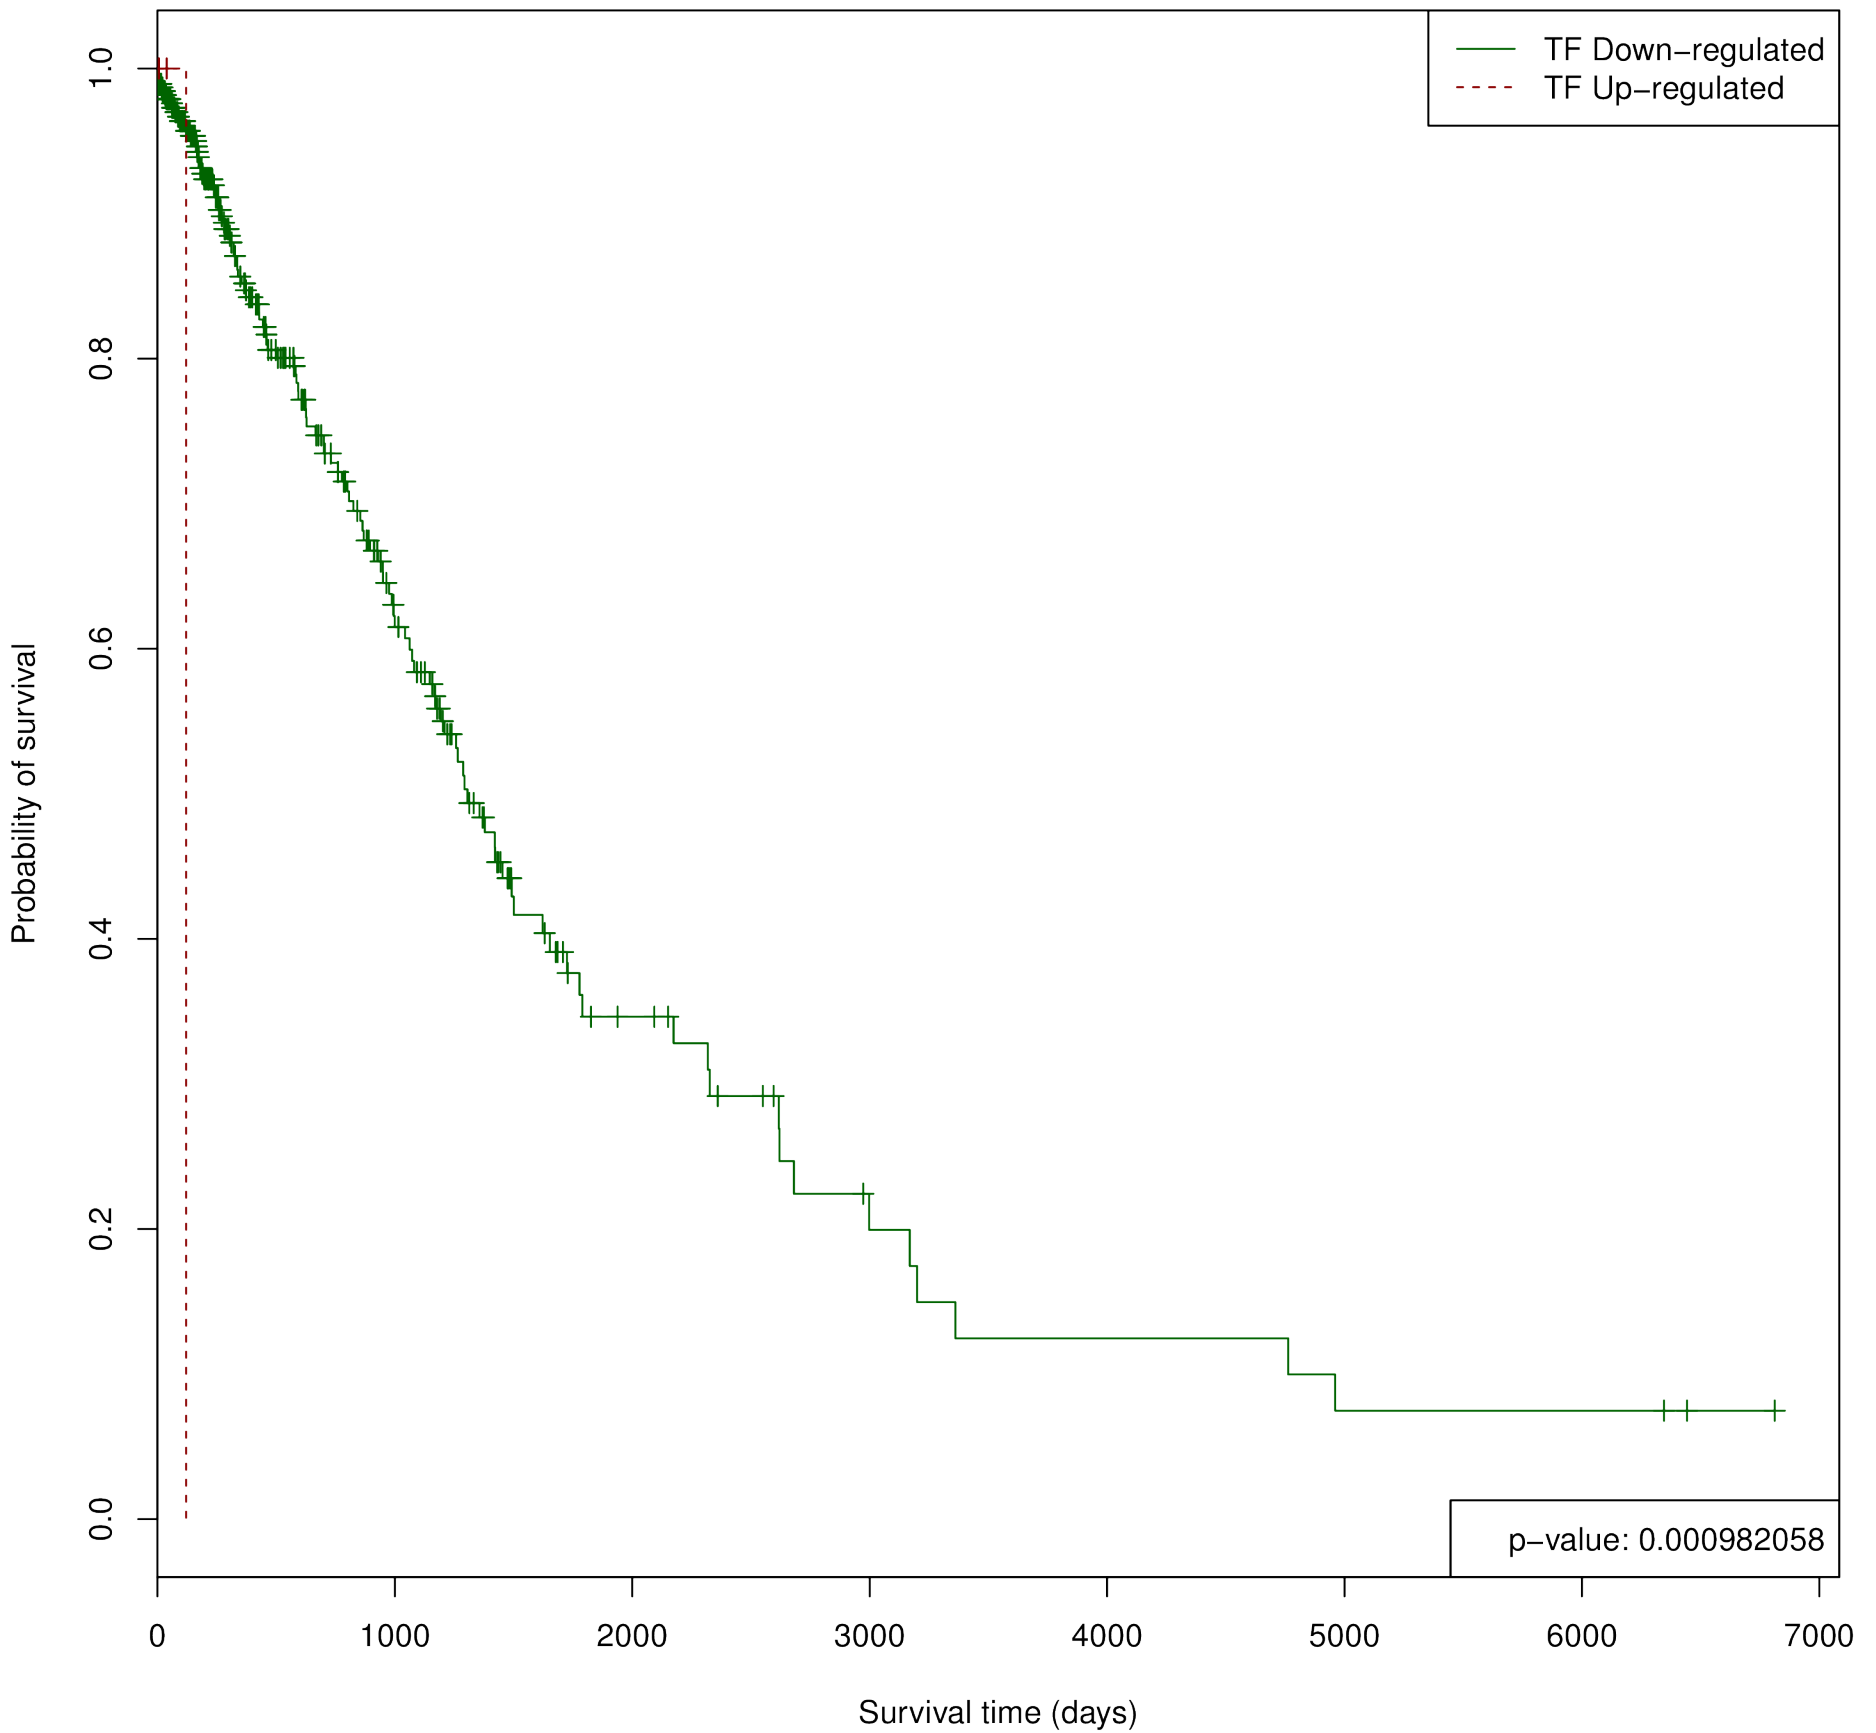

# MYC in COAD

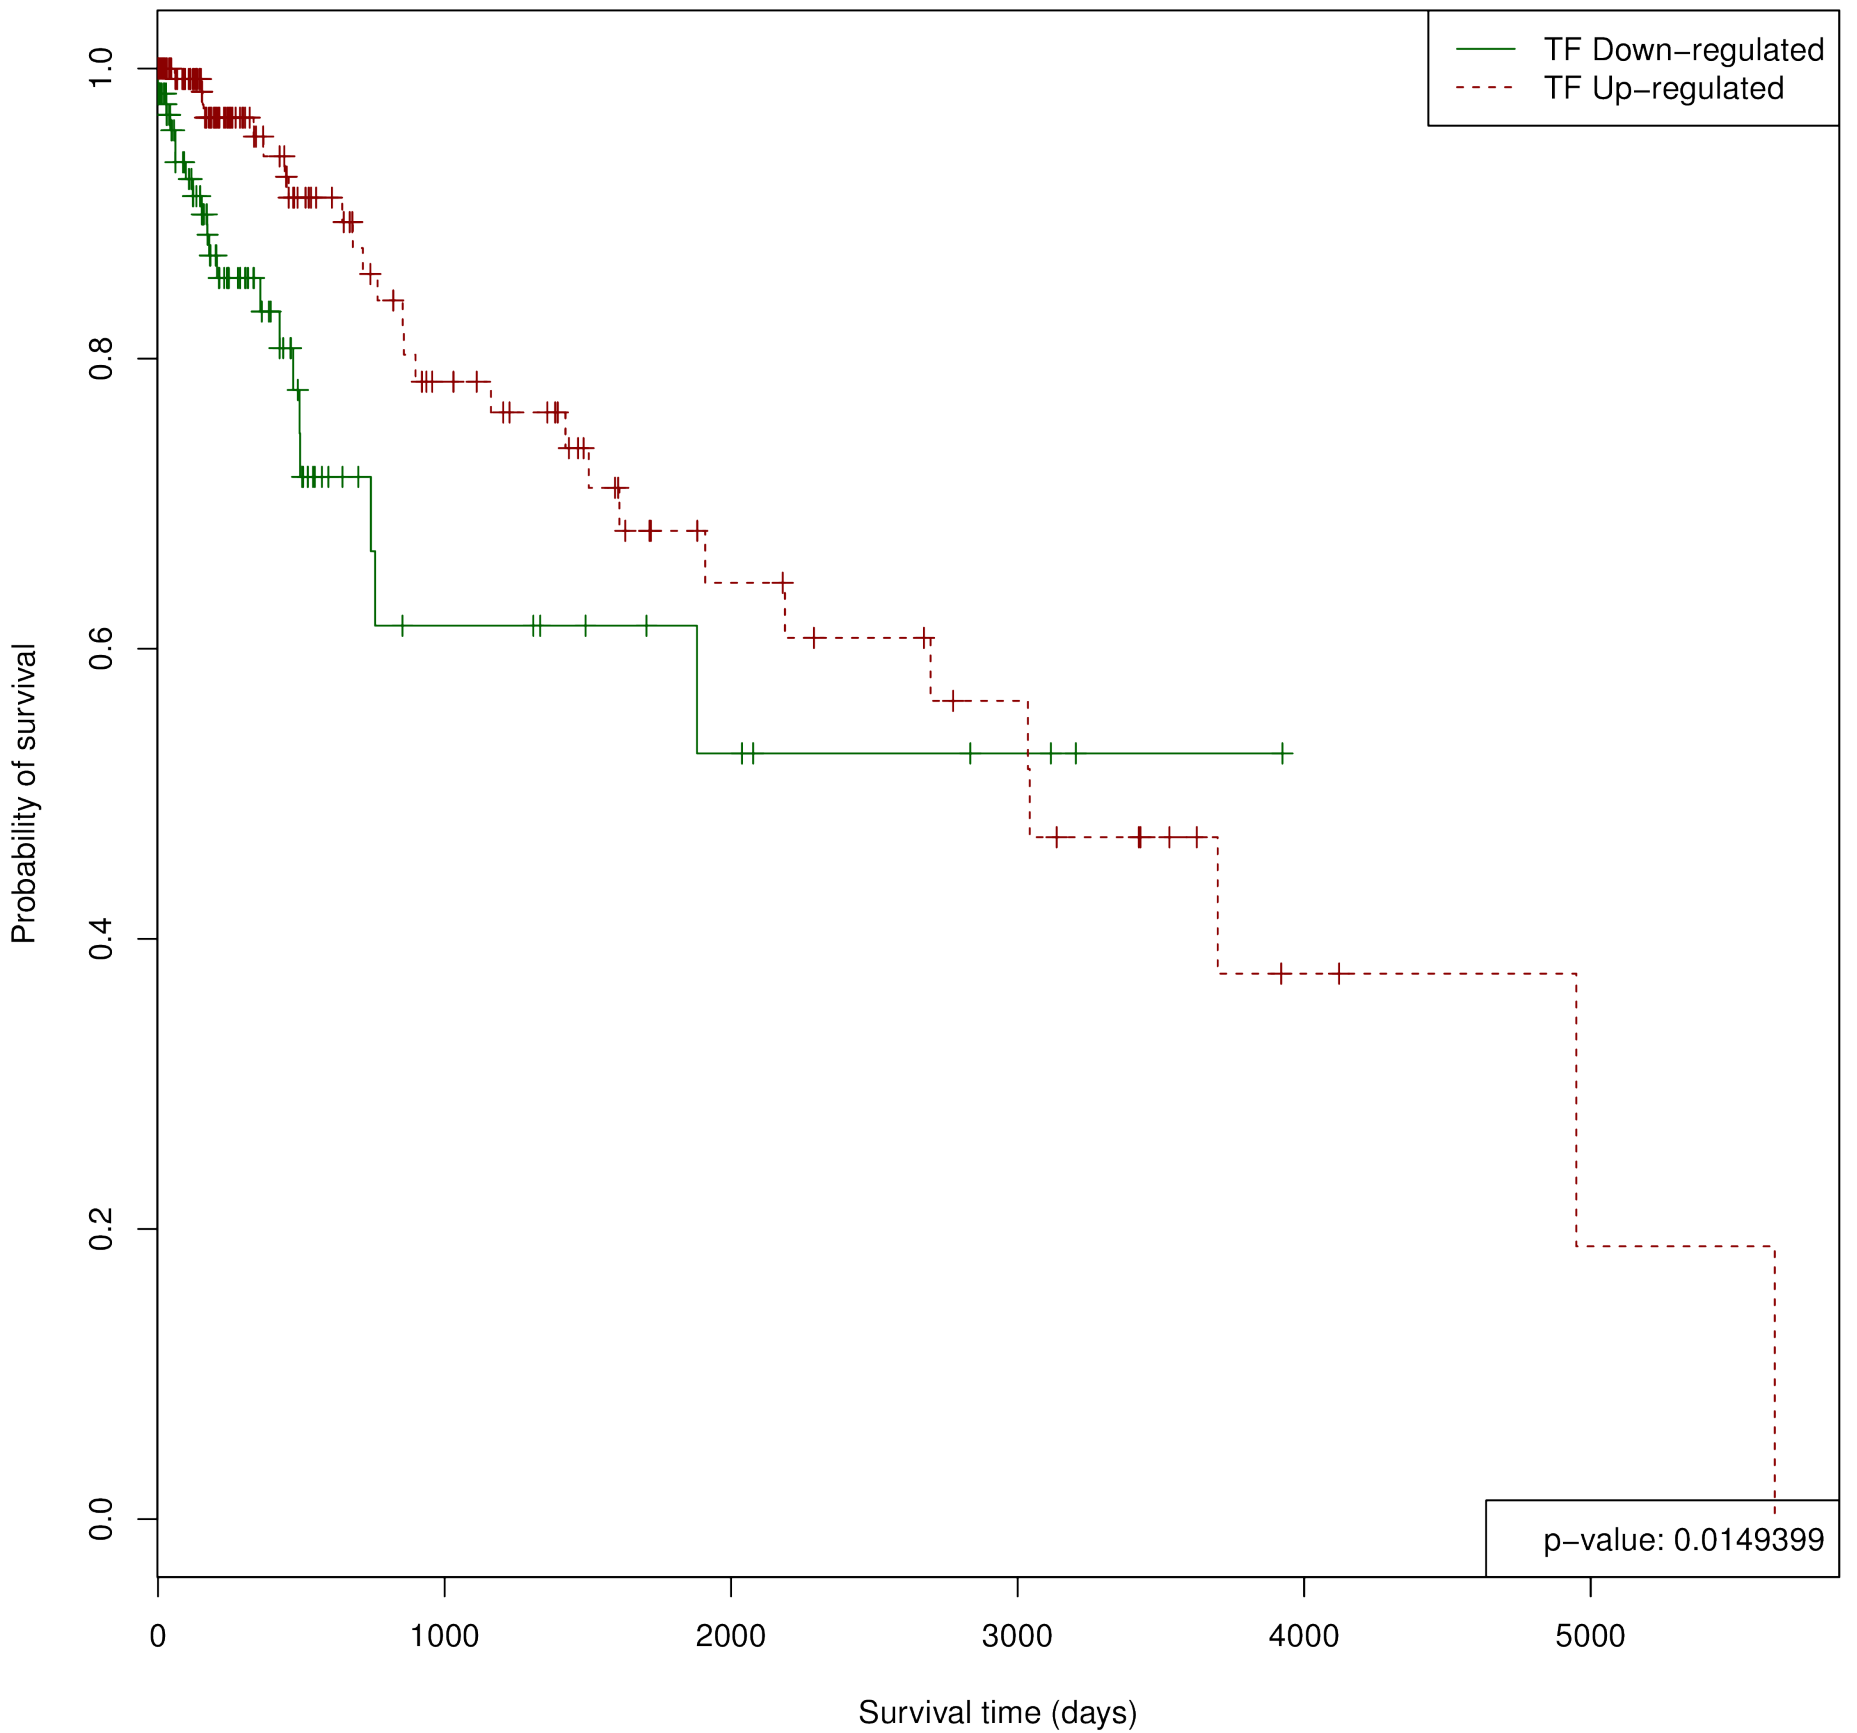

# MYC in HNSC

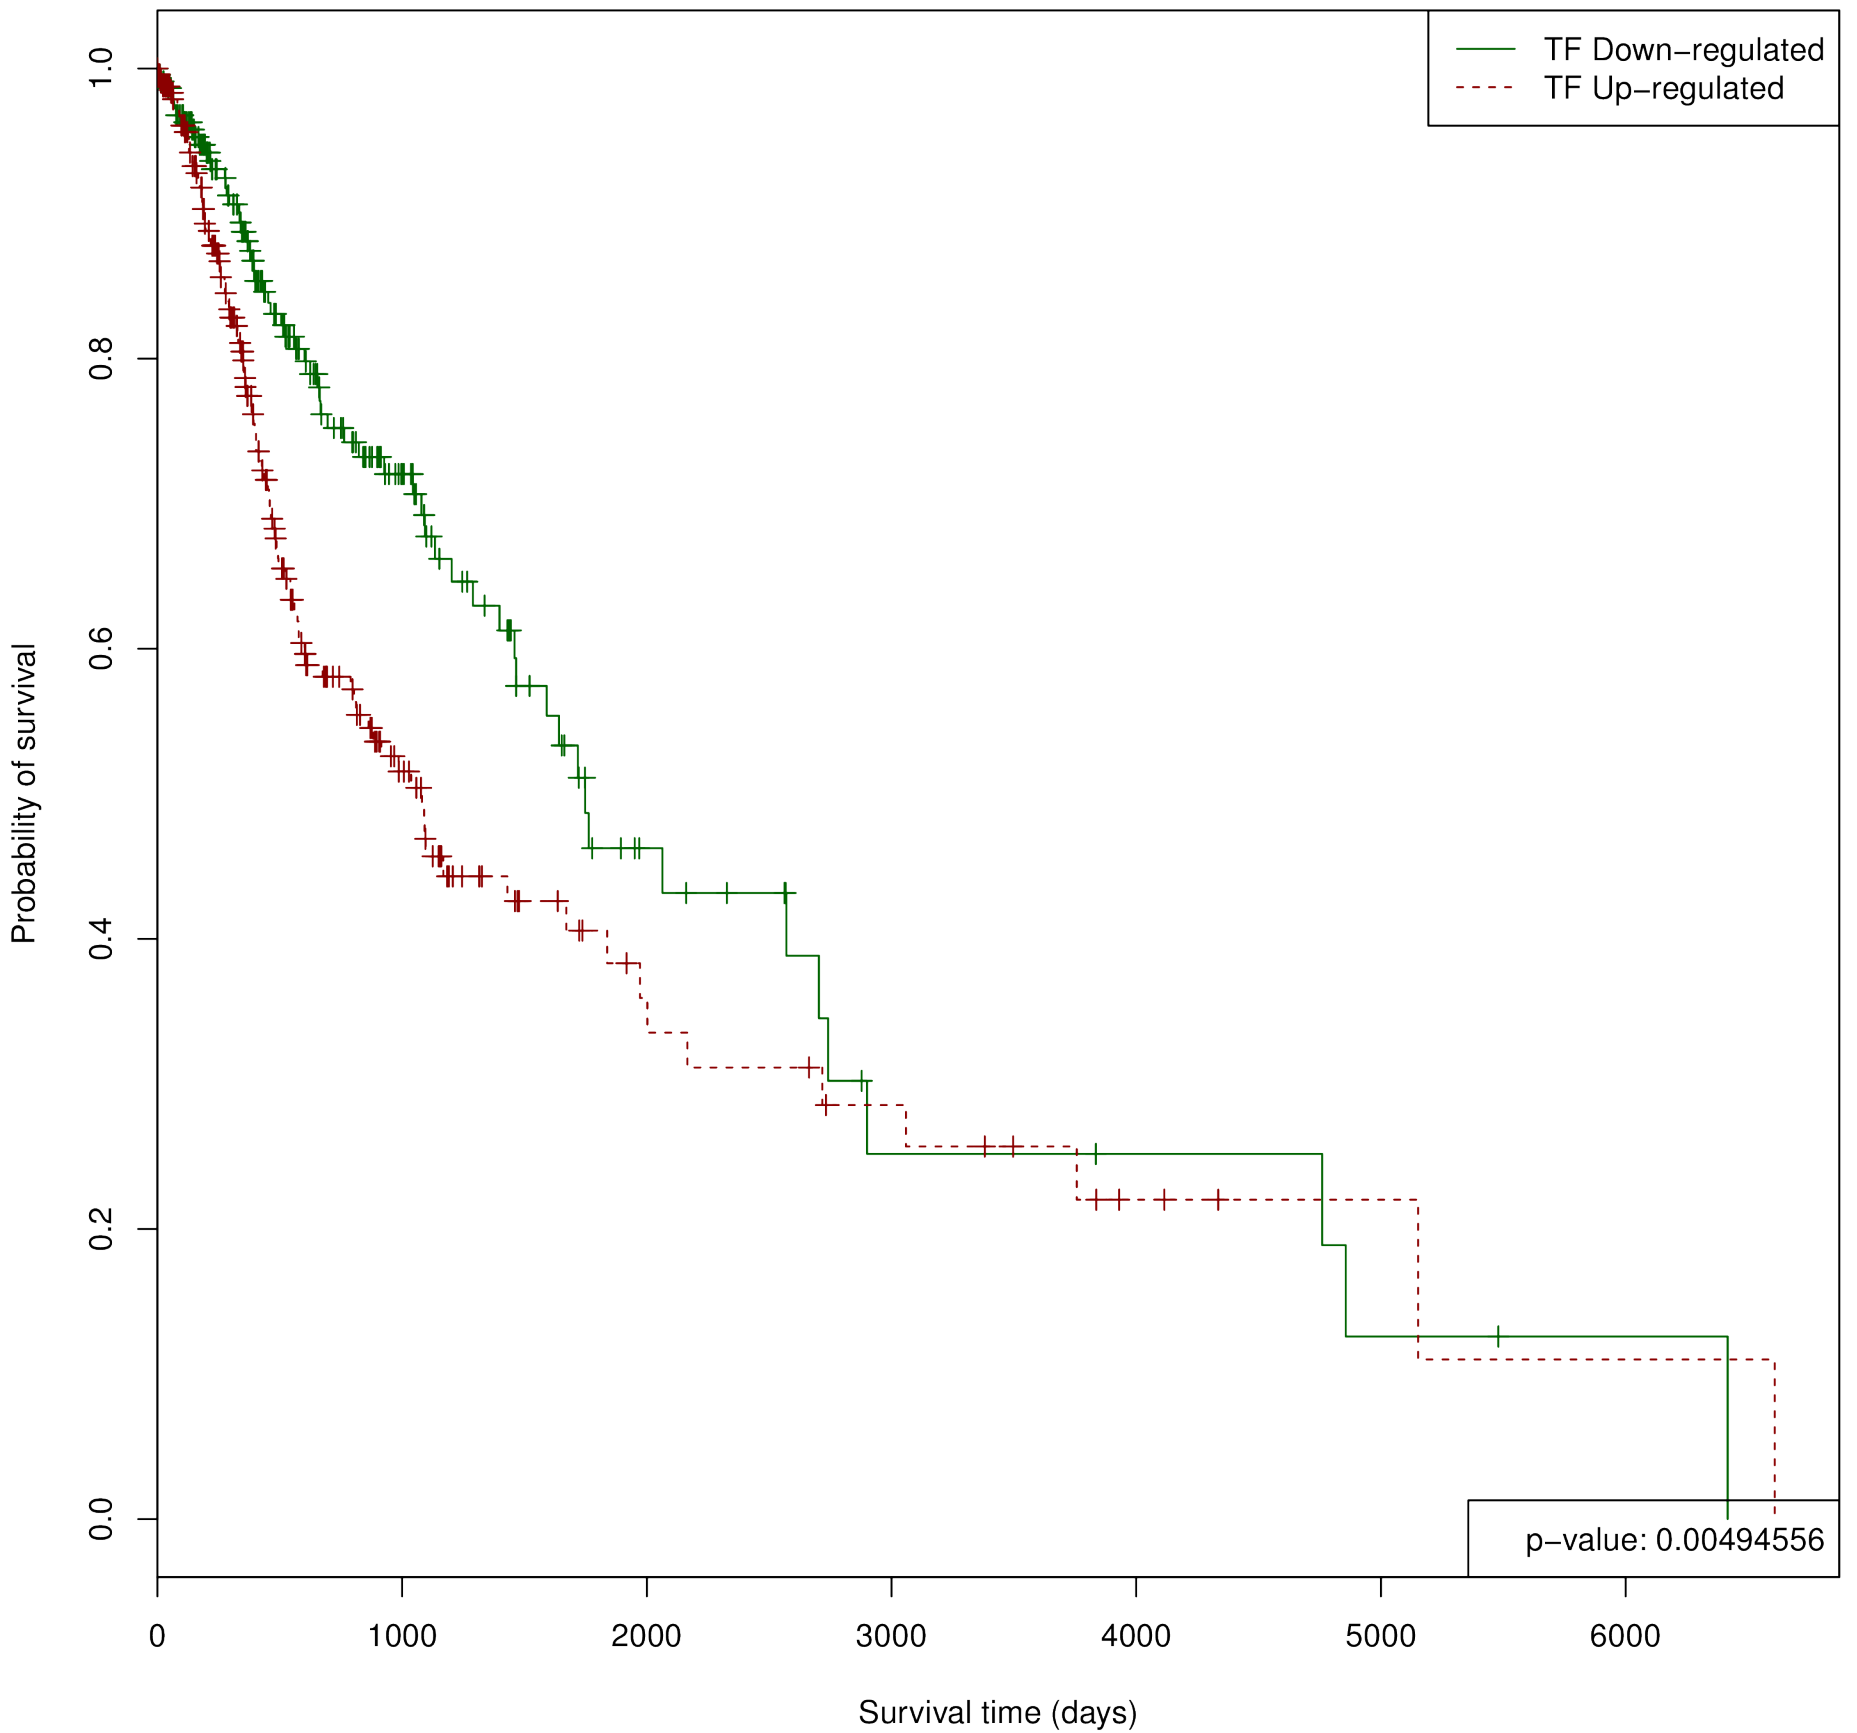

# MYC in KIRC

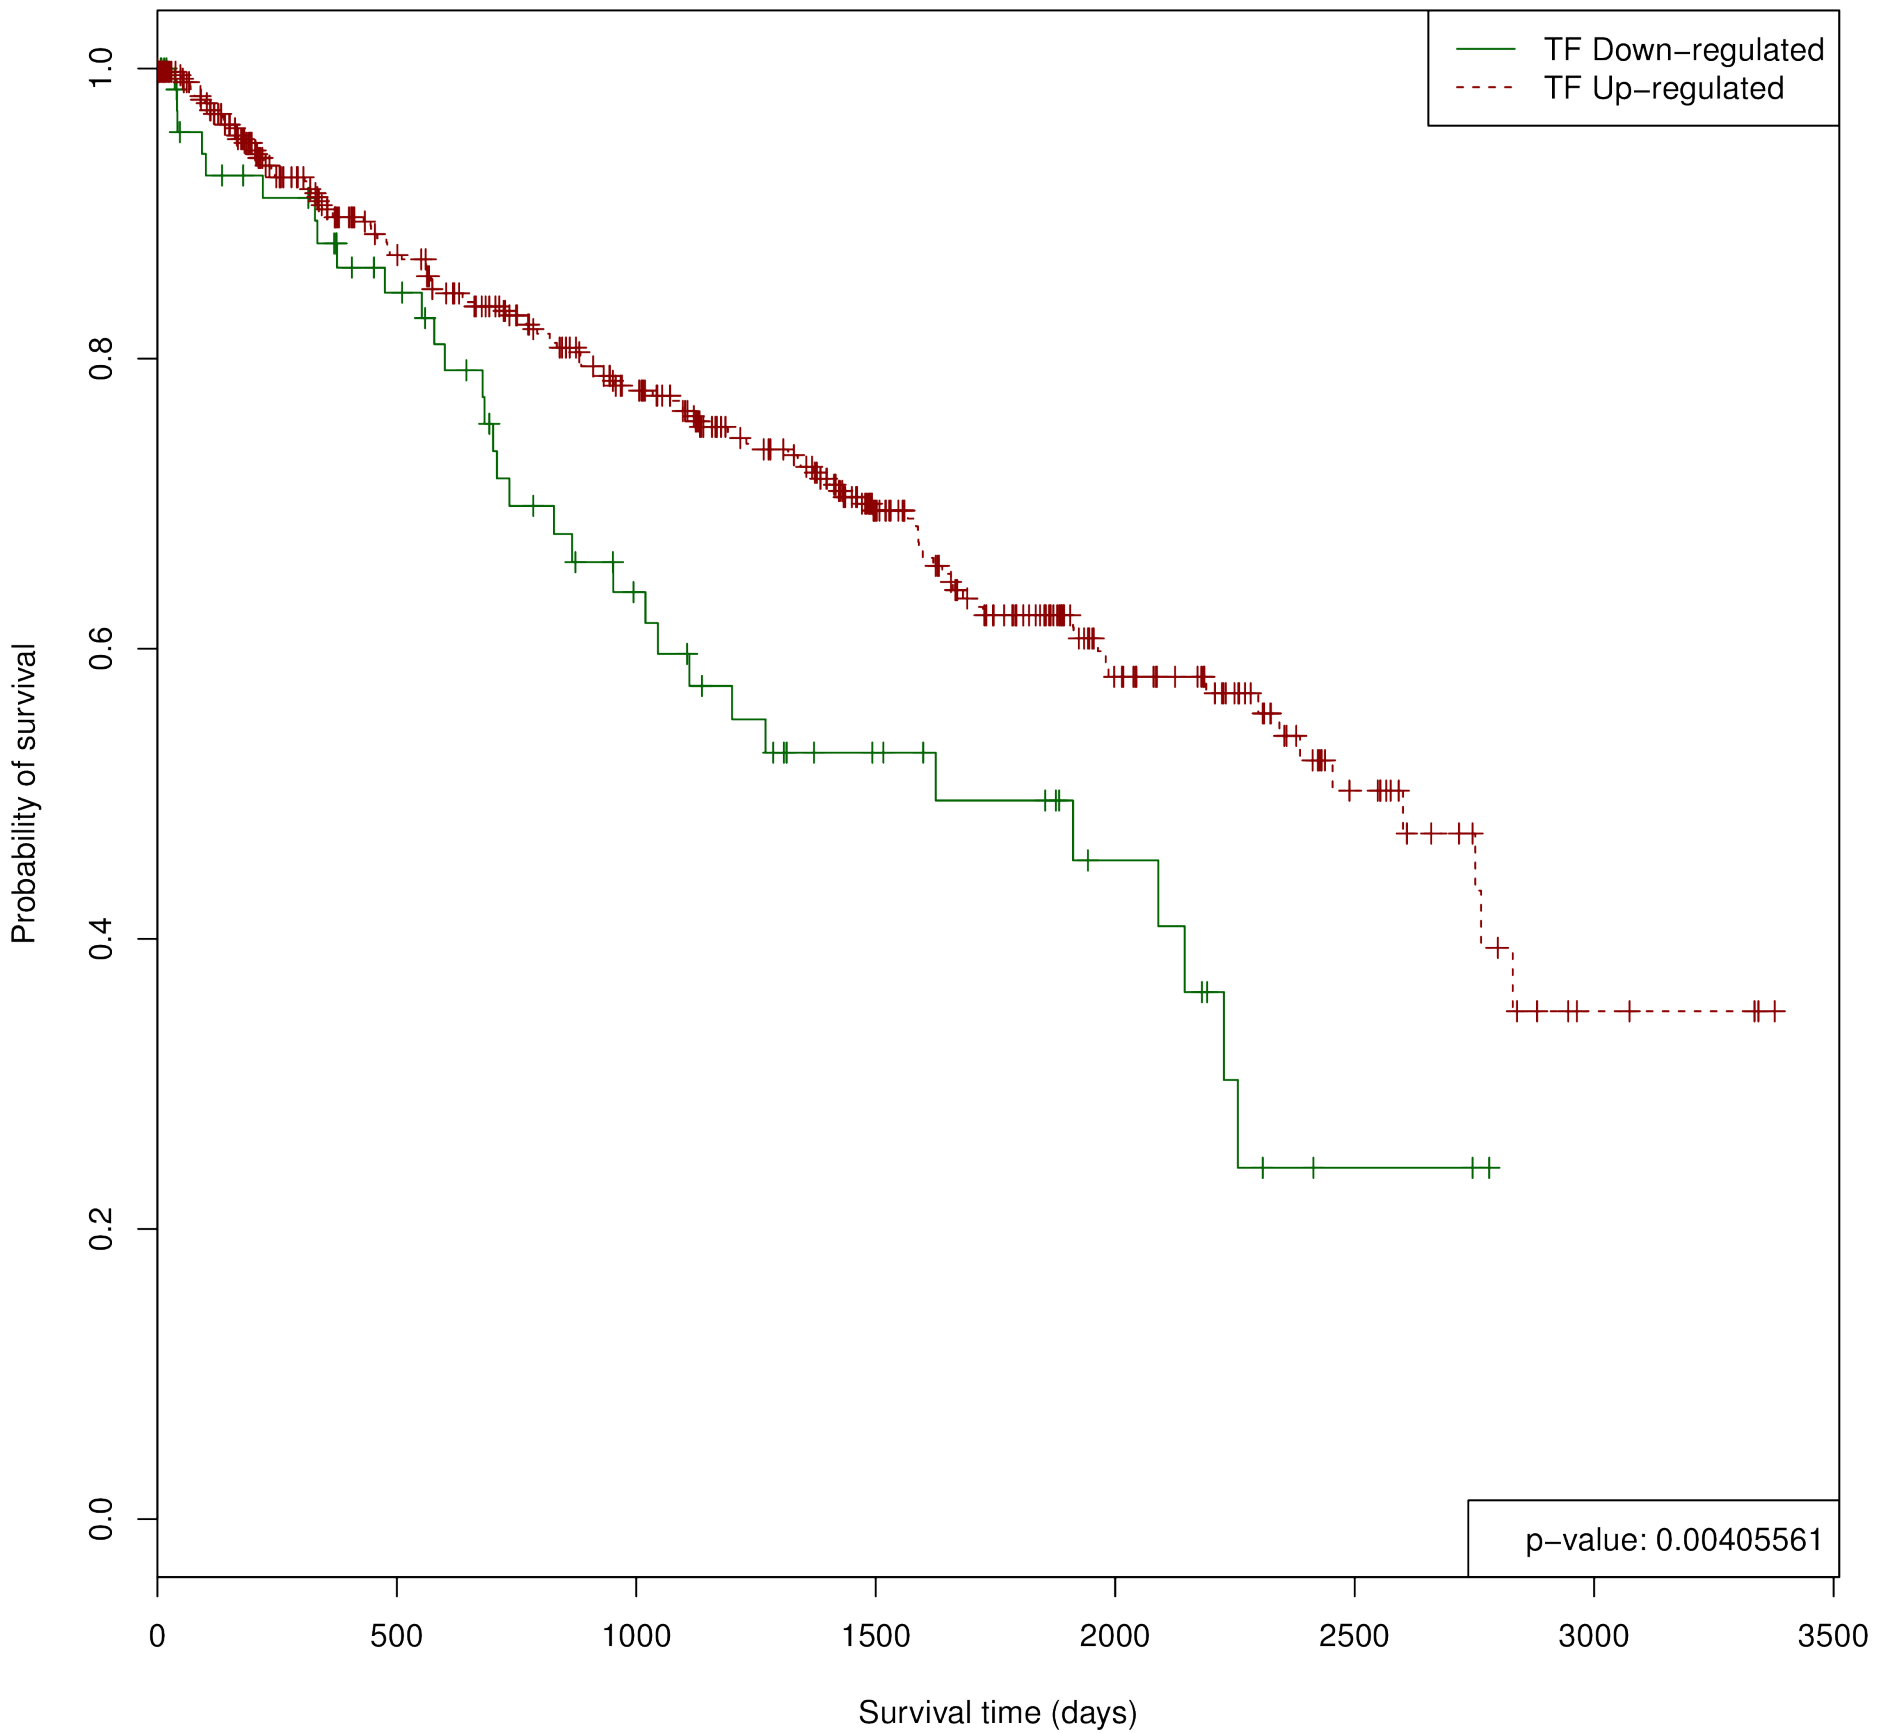

# MYC::MAX in KIRC

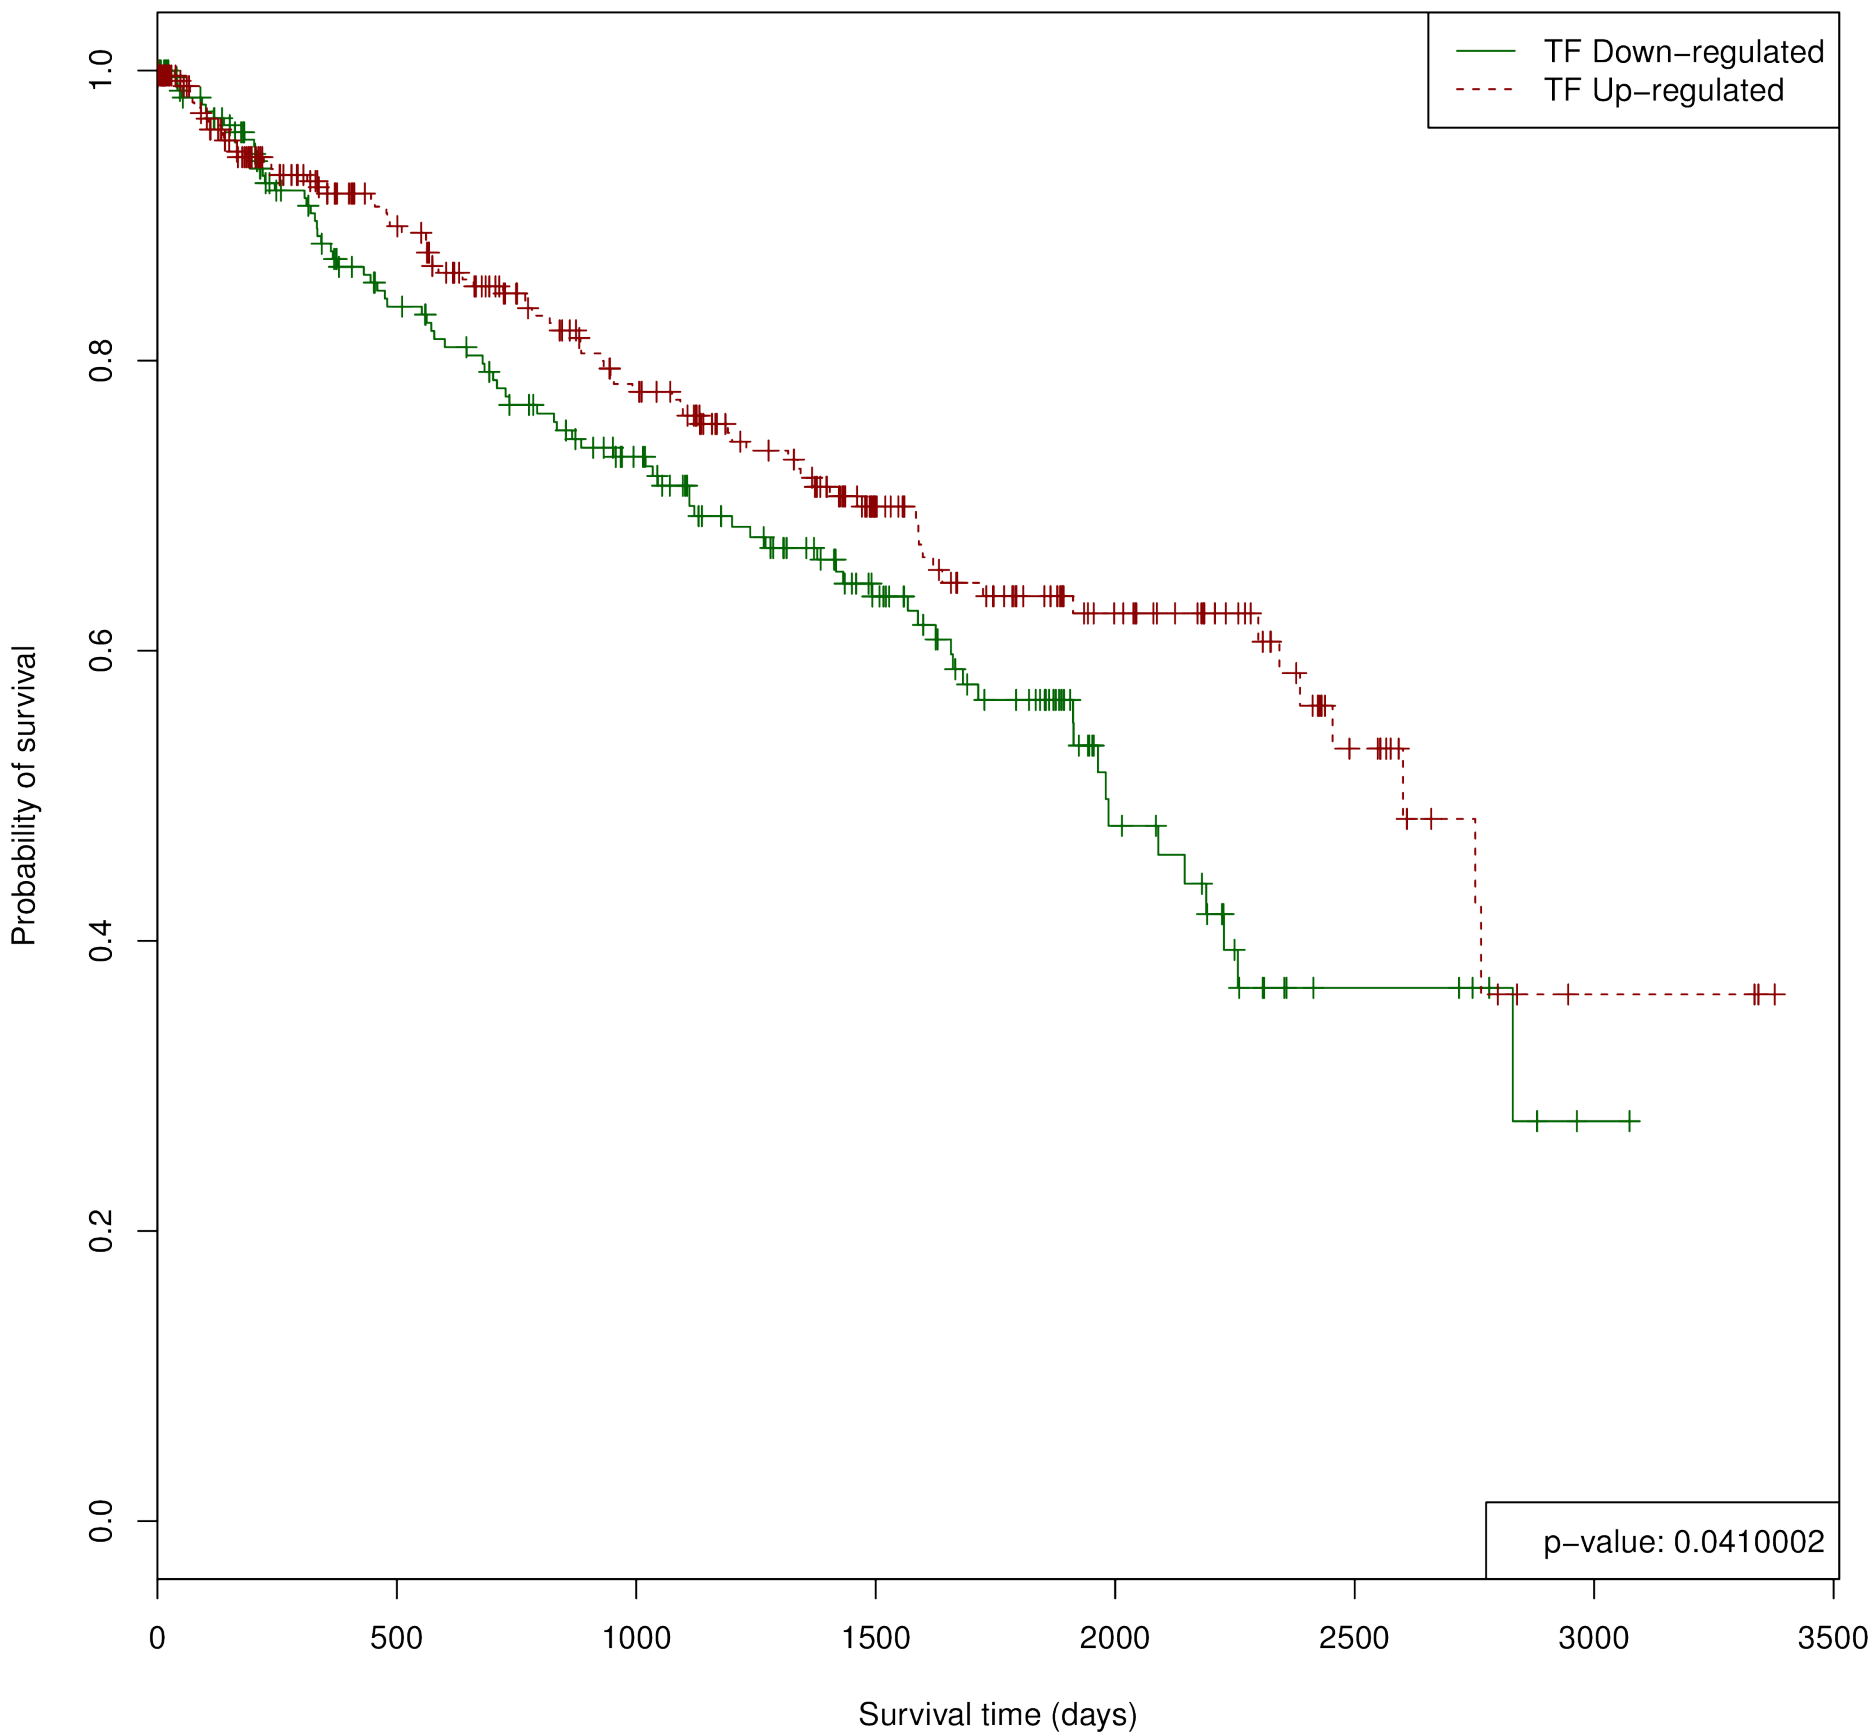



# NR1H3::RXRA in UCEC

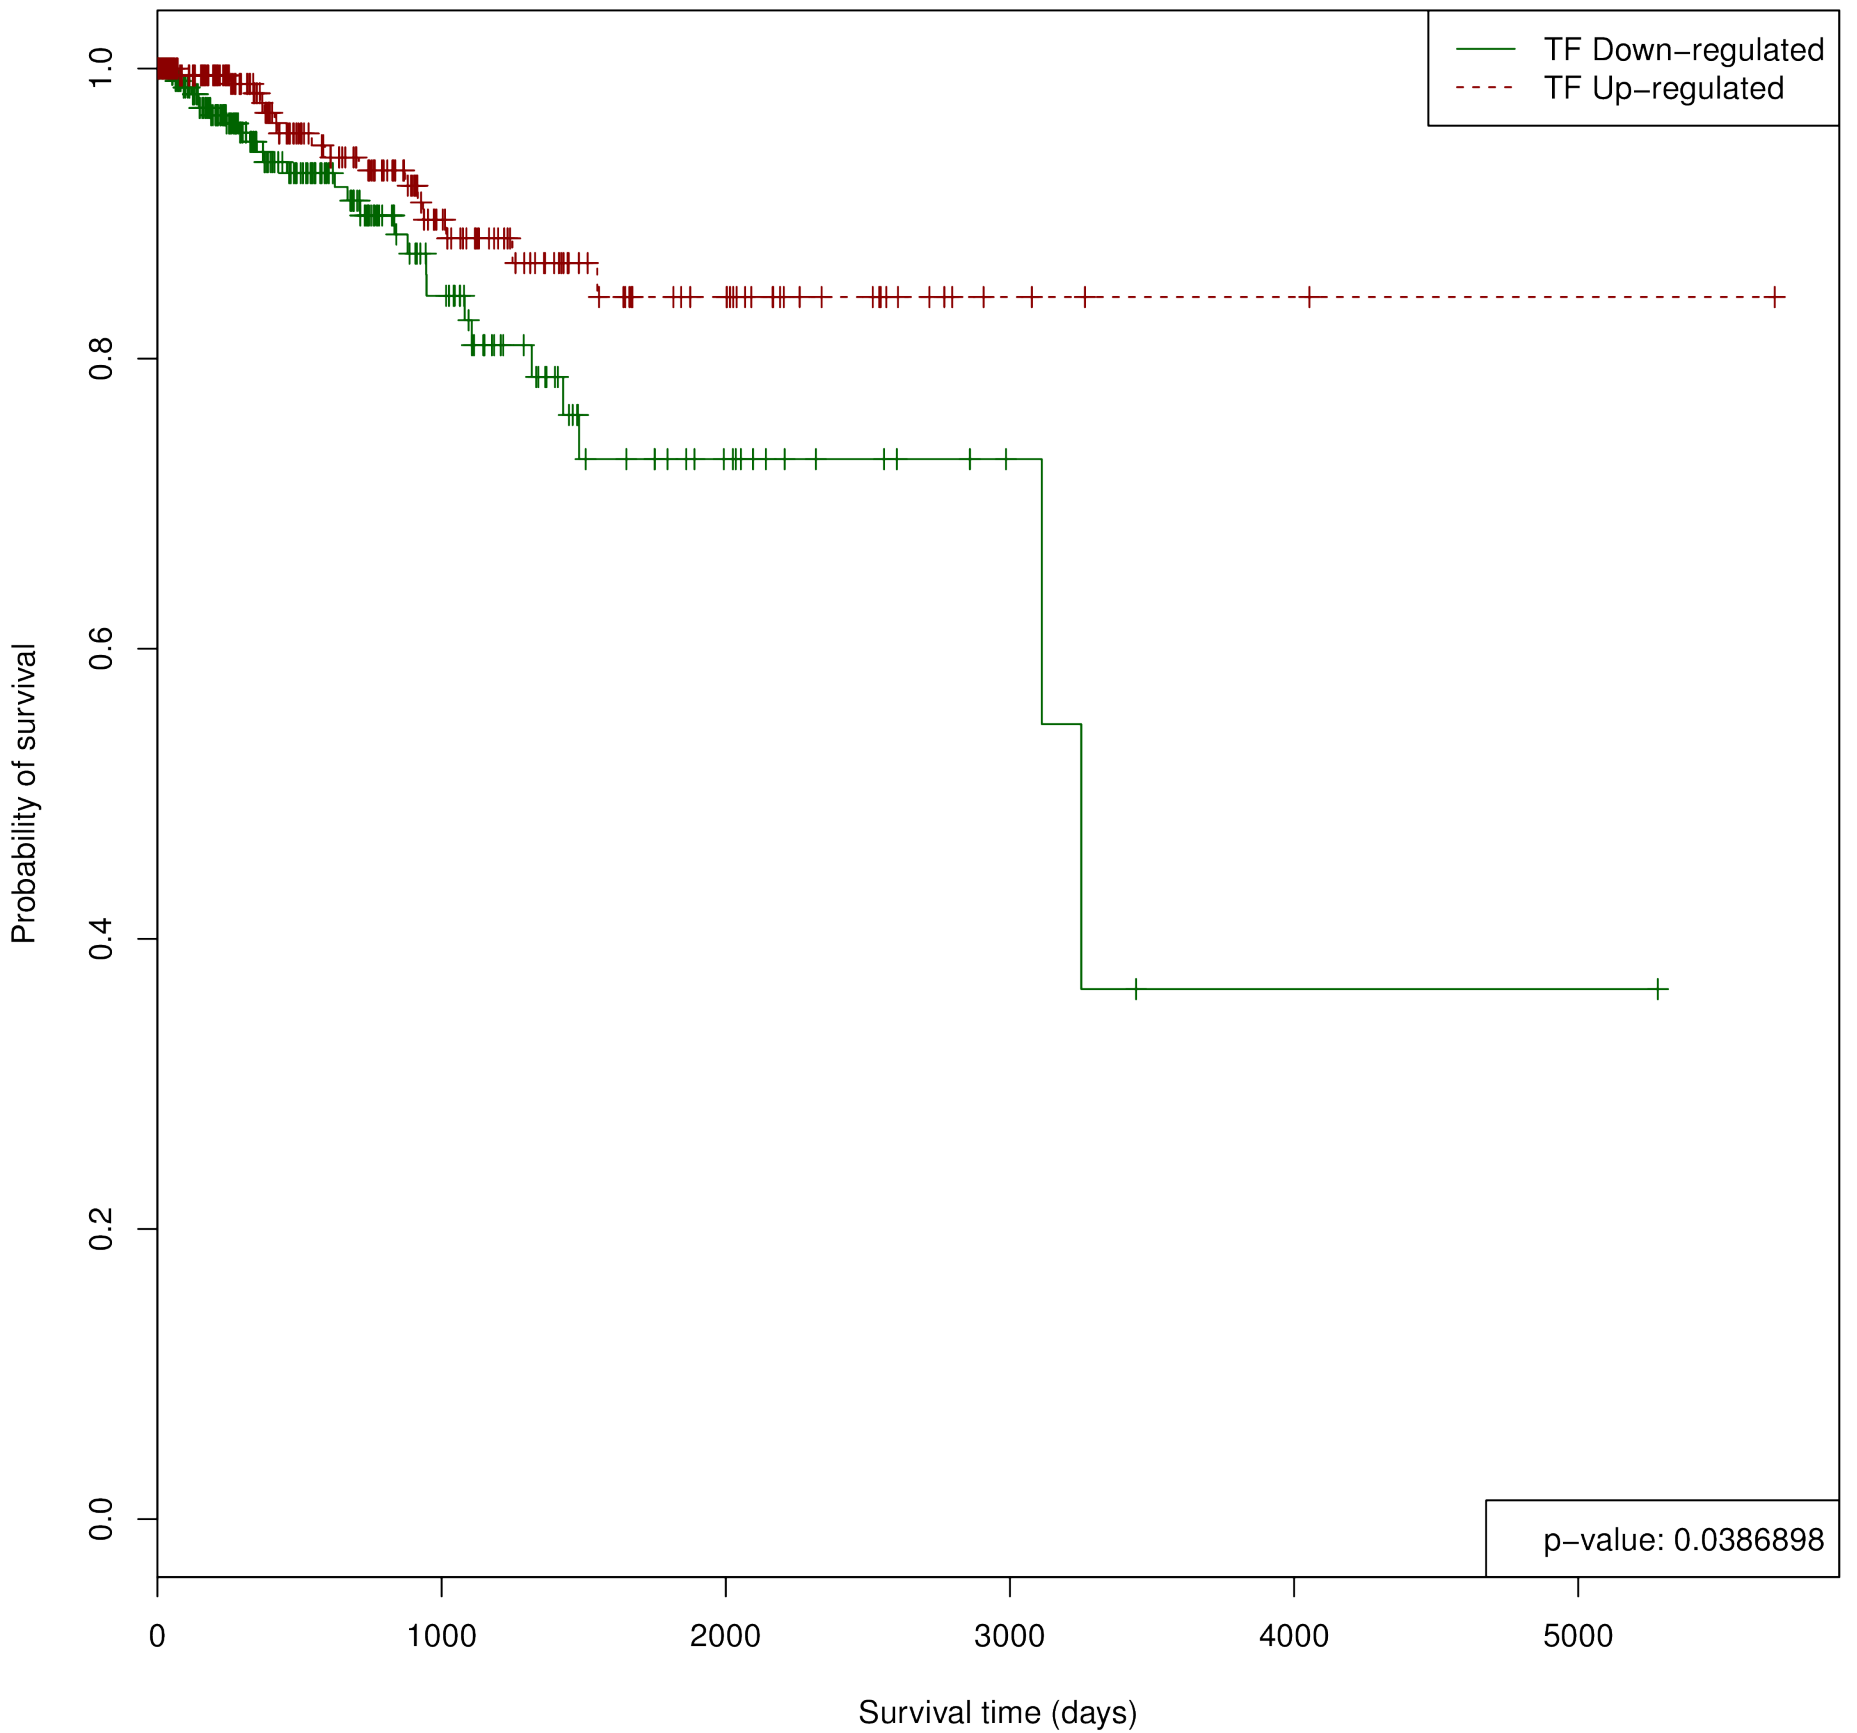

# NR2C2 in HNSC

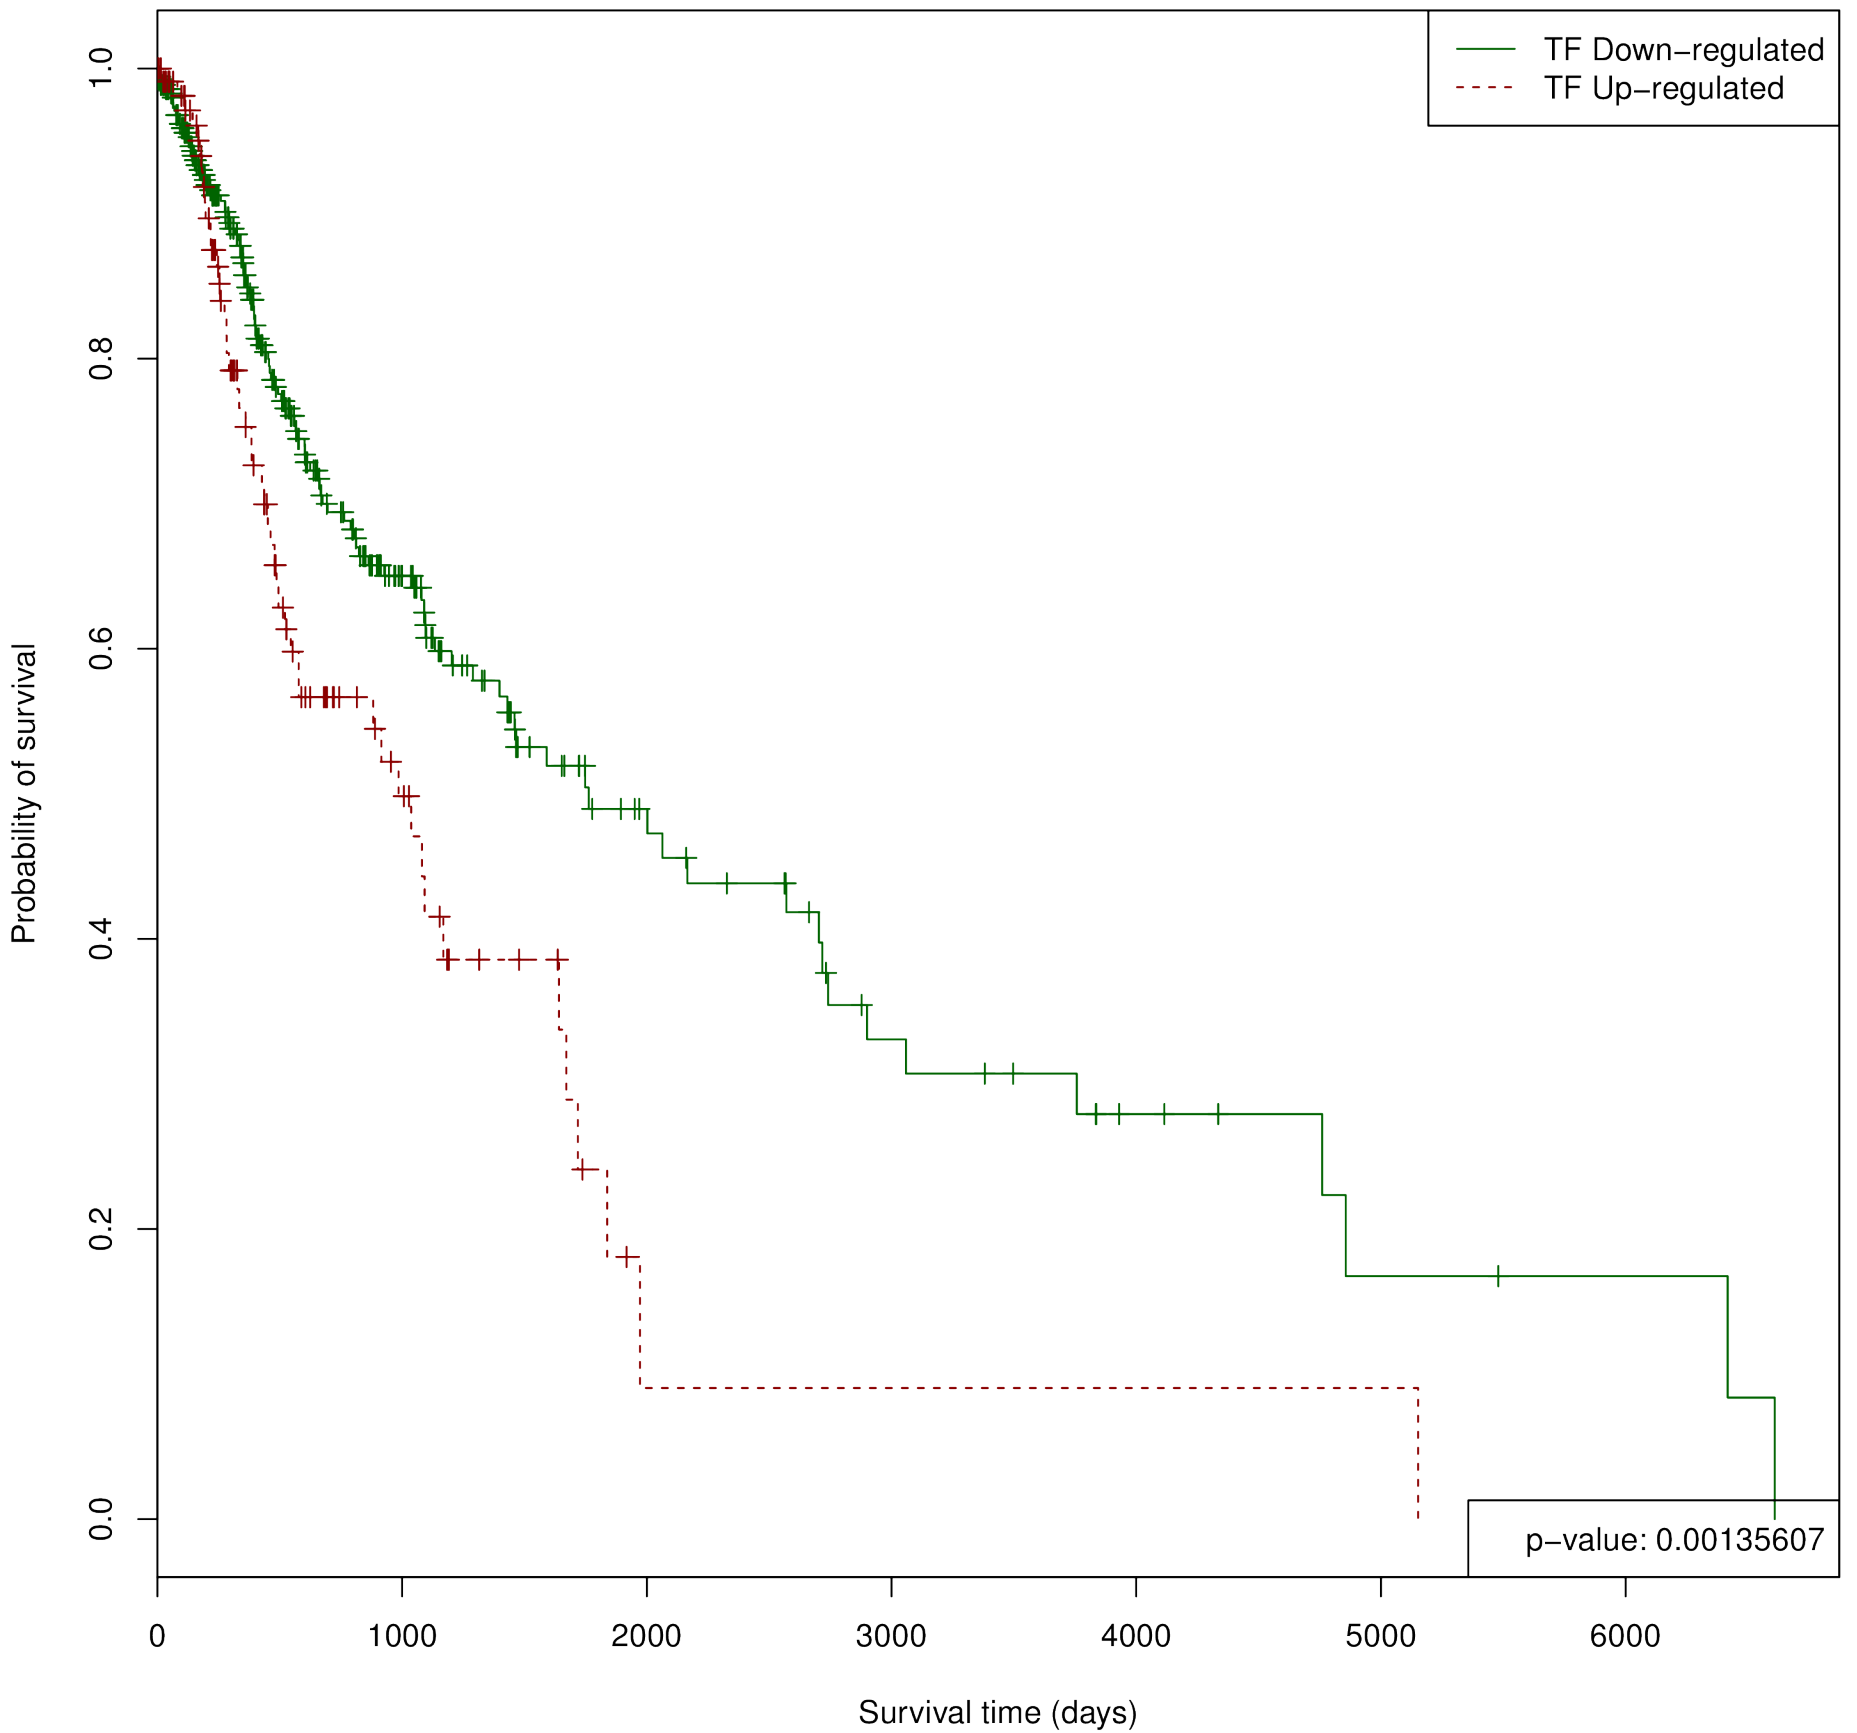

# NR2C2 in KIRC

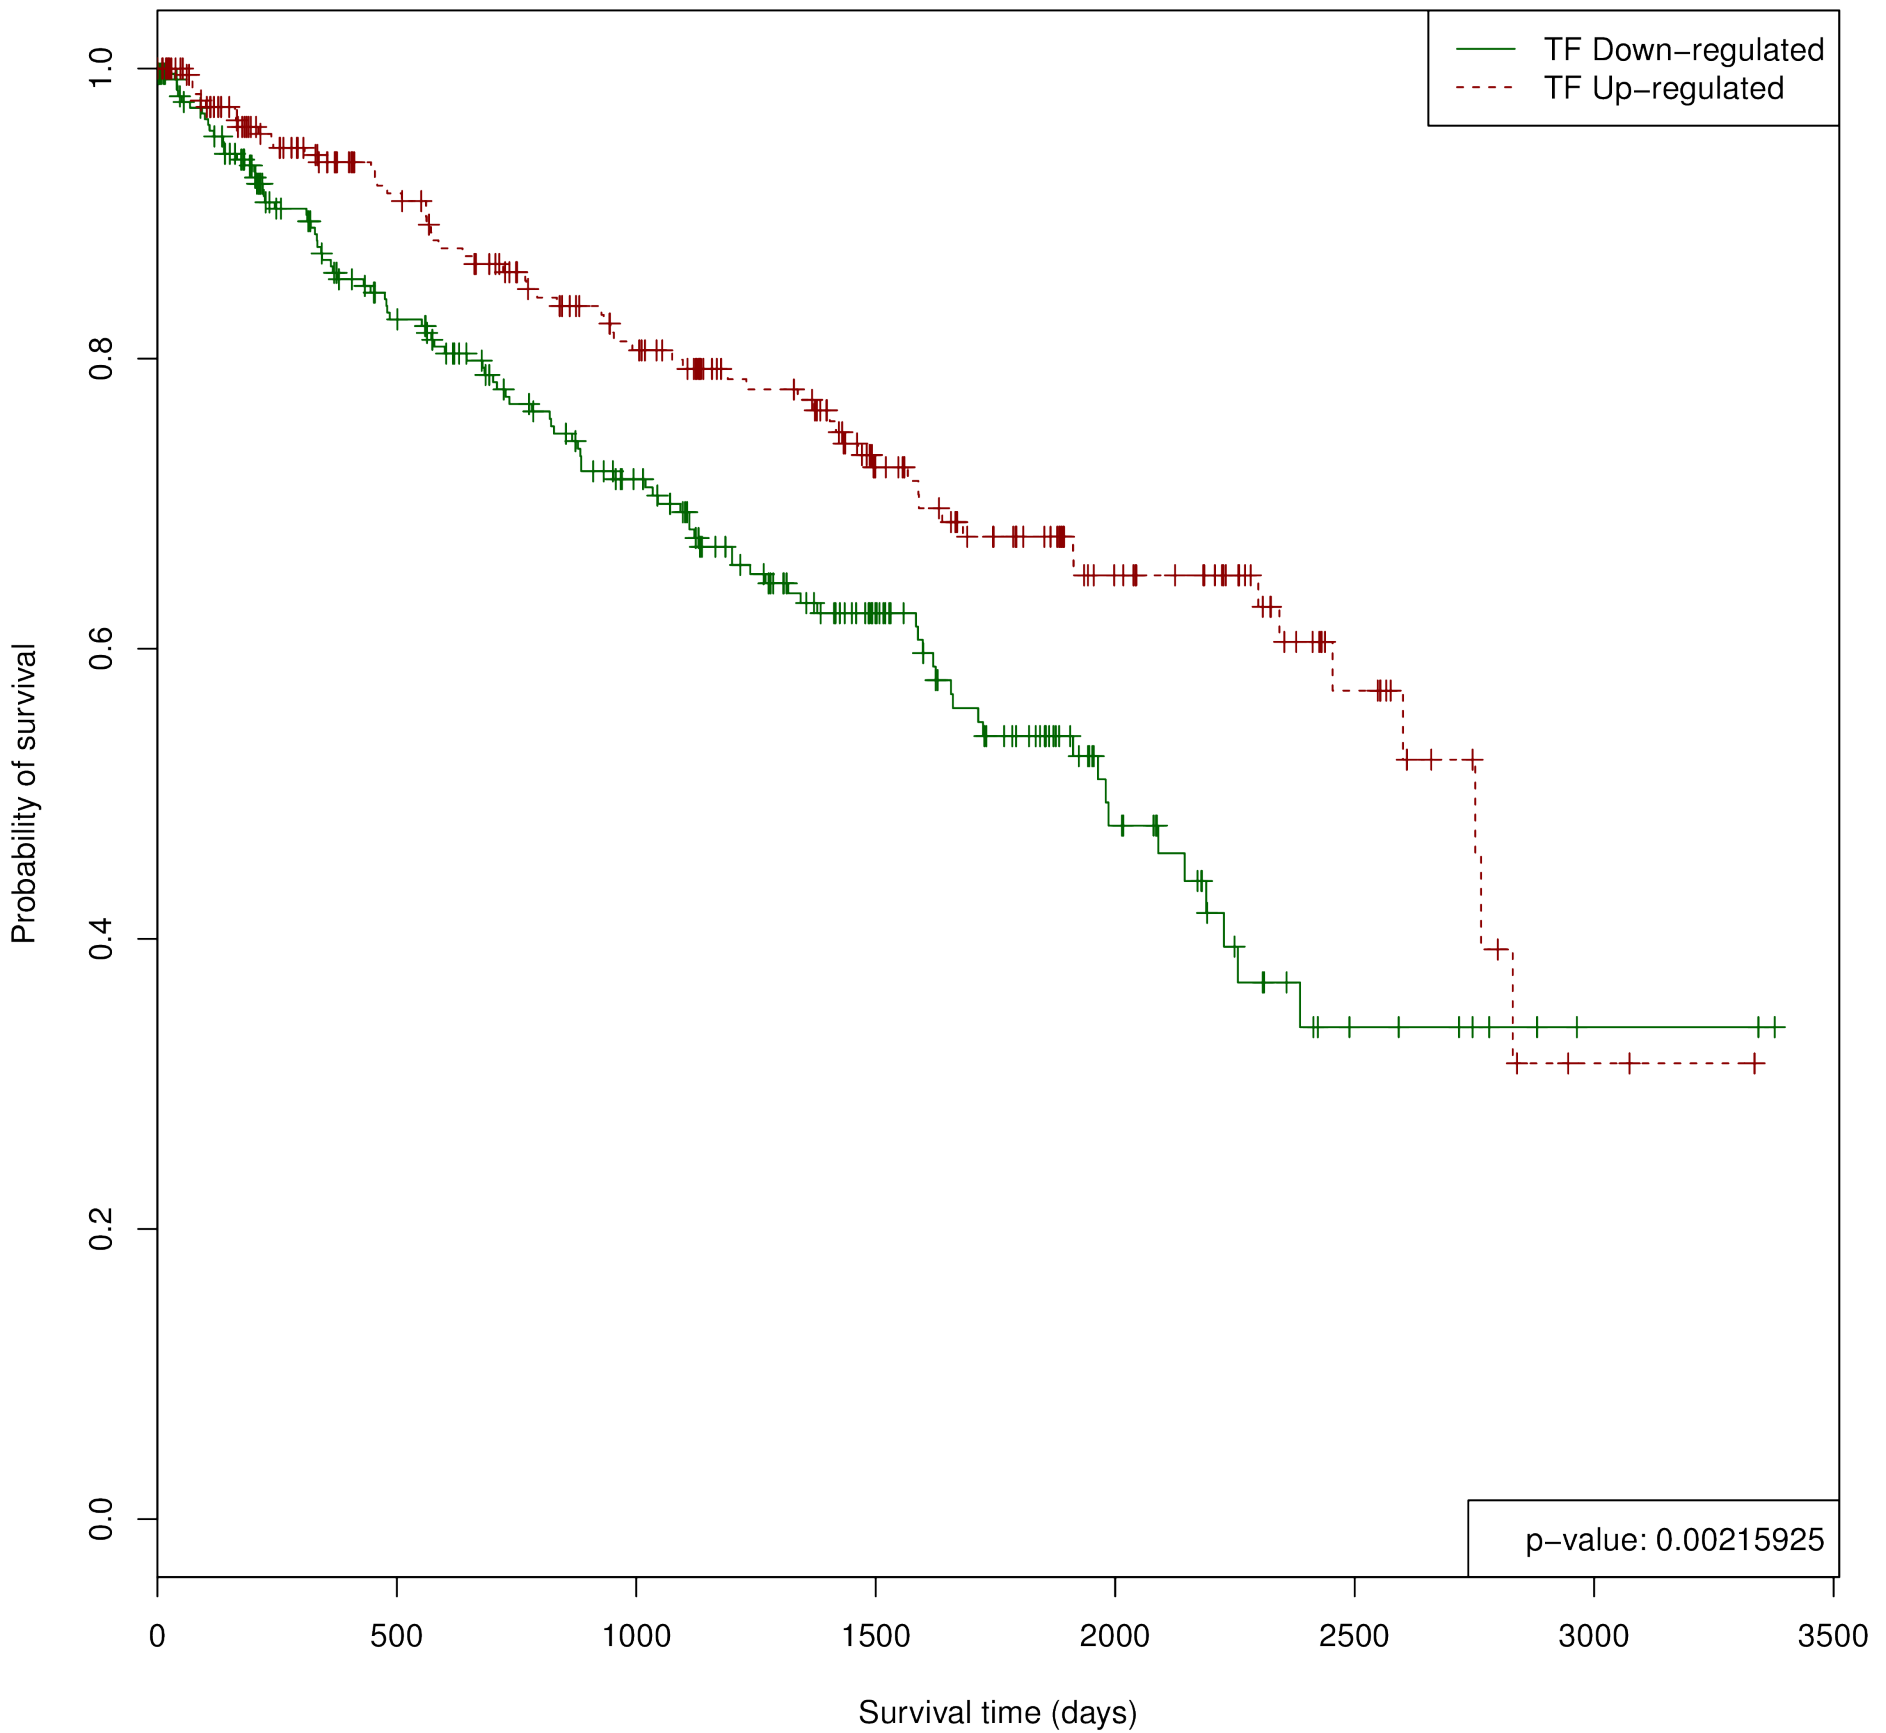

# NRF1 in HNSC

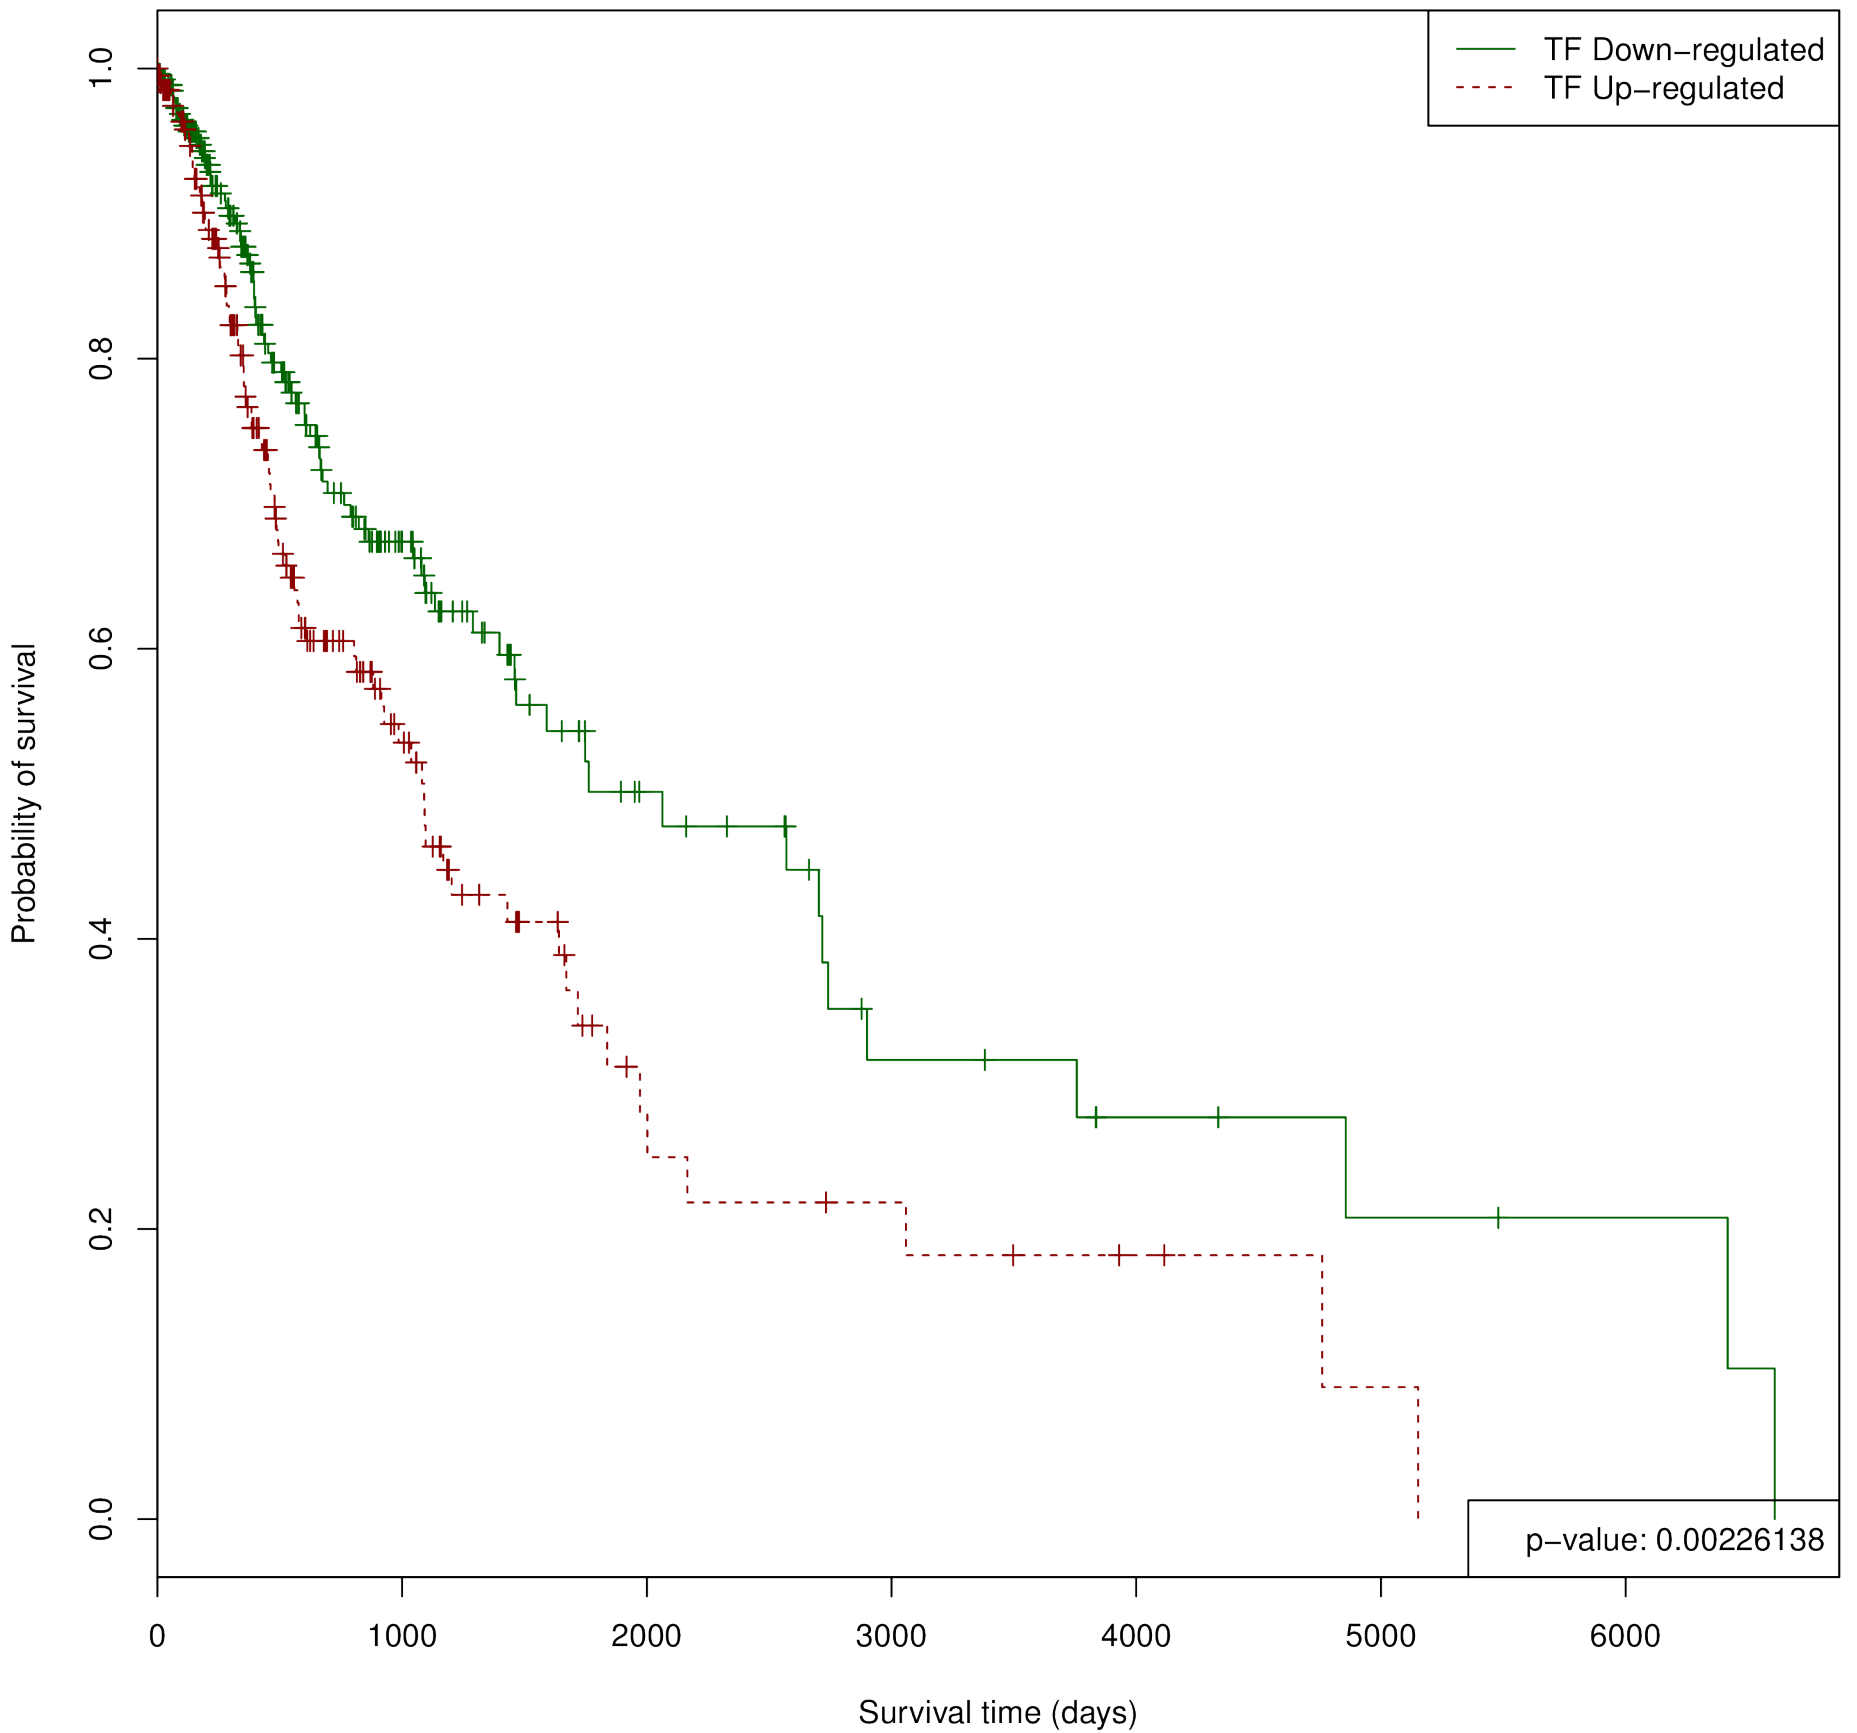

# NRF1 in KIRC

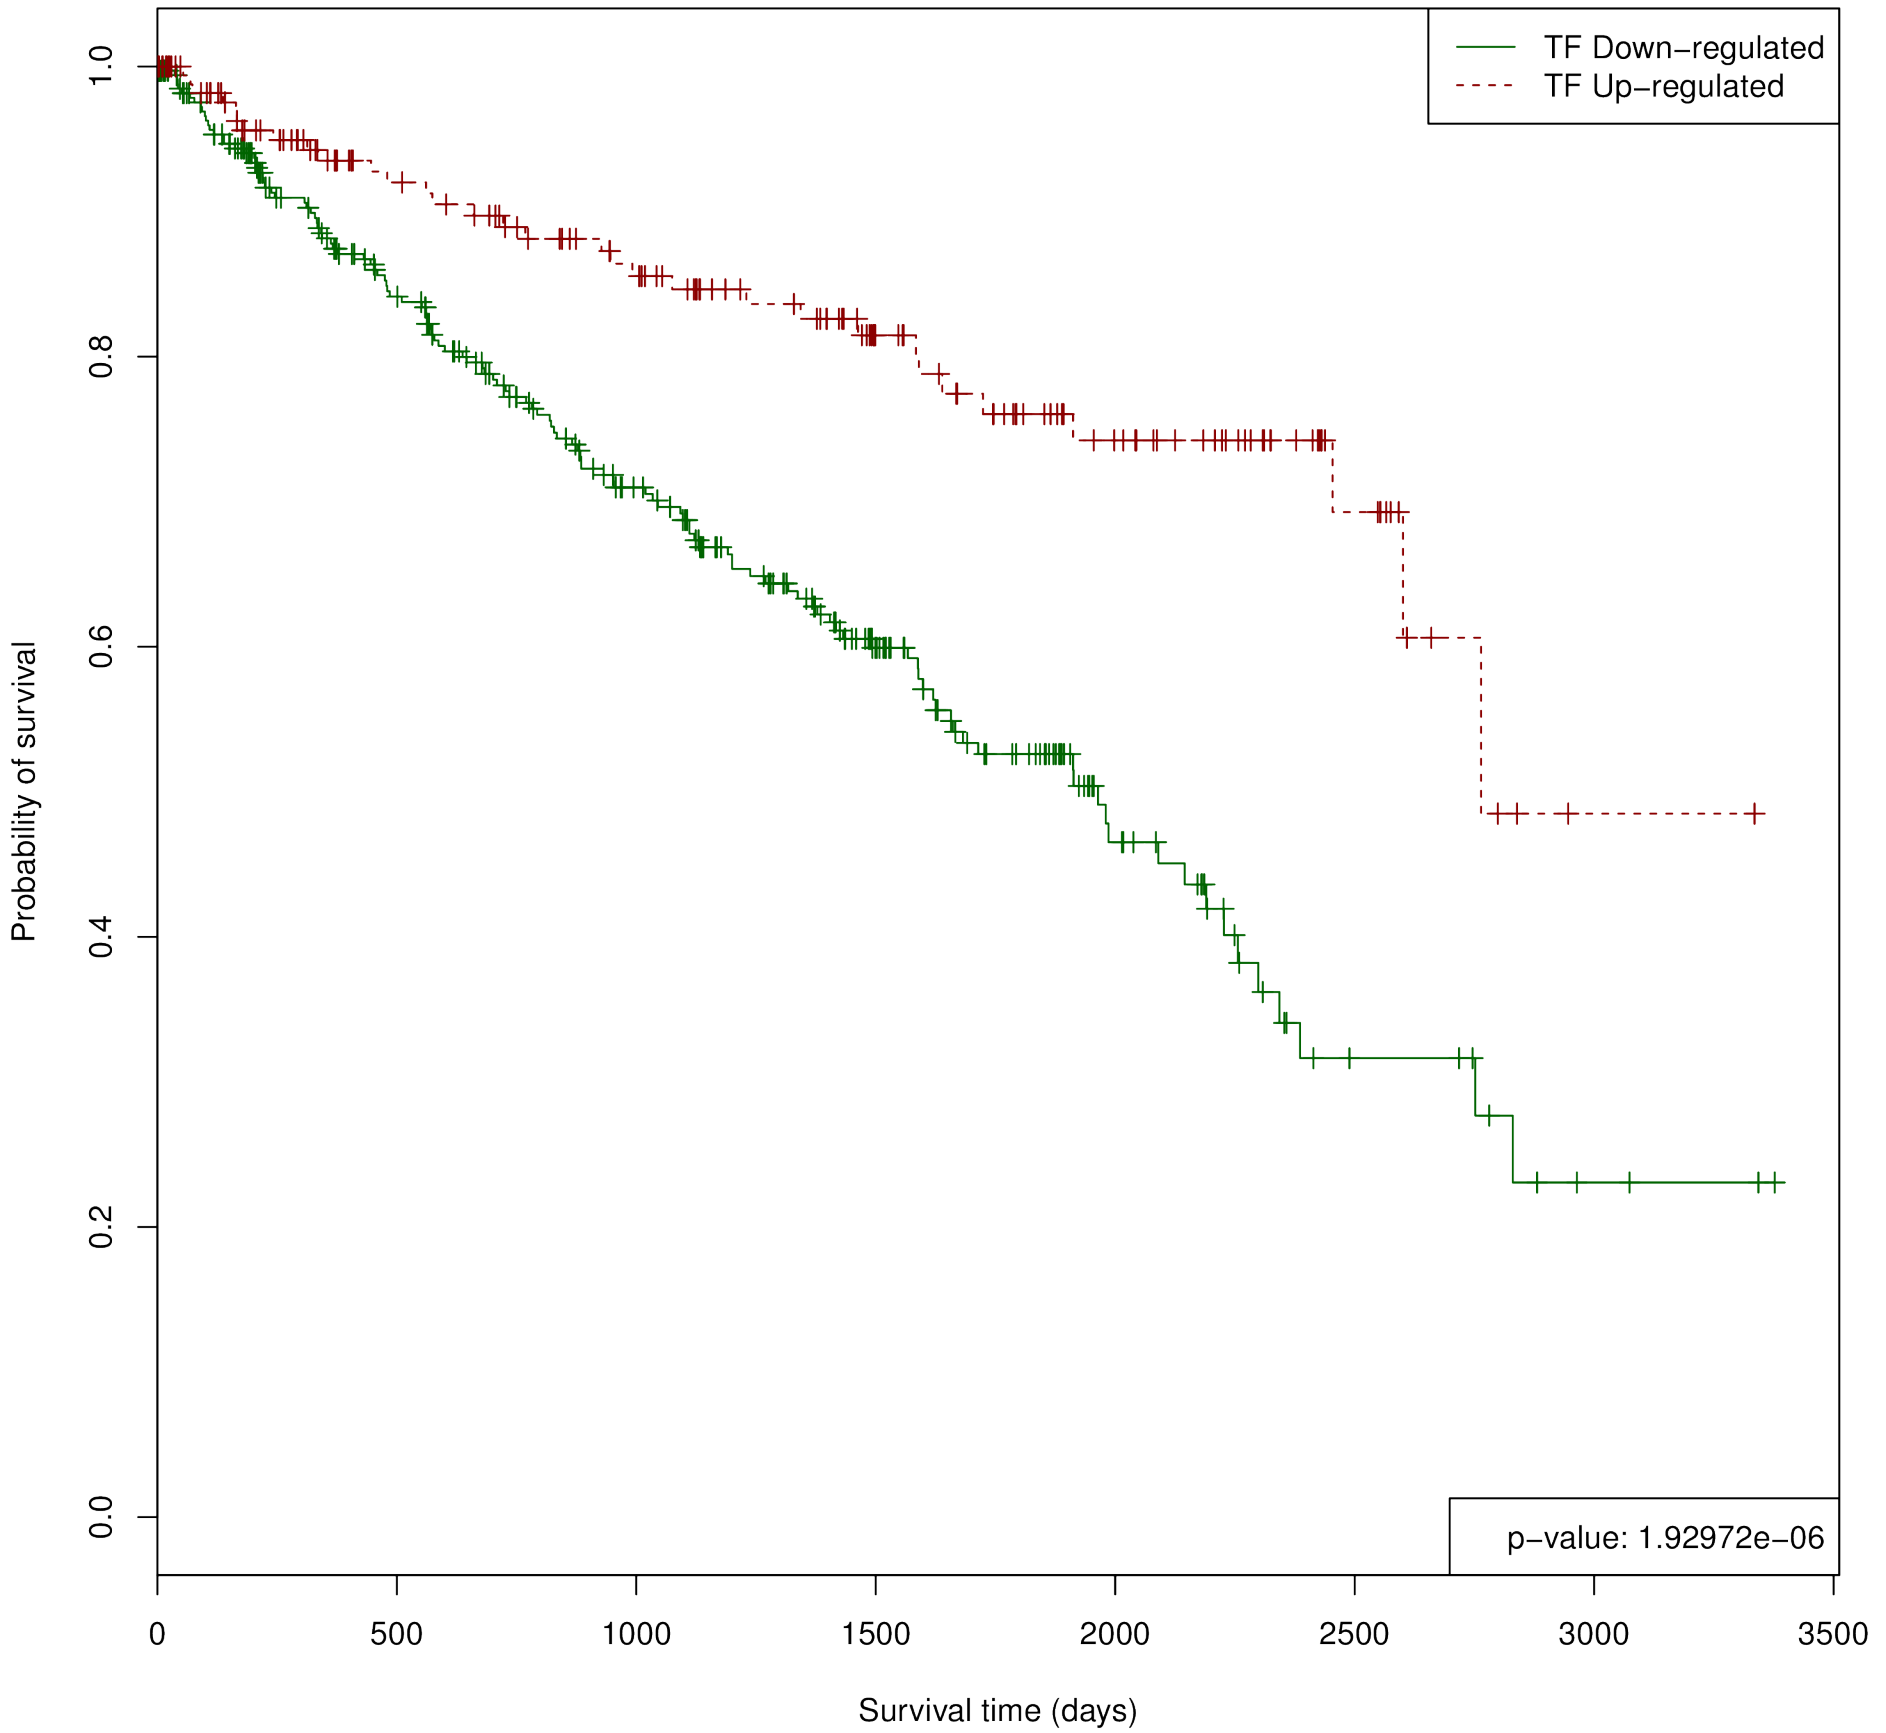

# NRF1 in LUSC

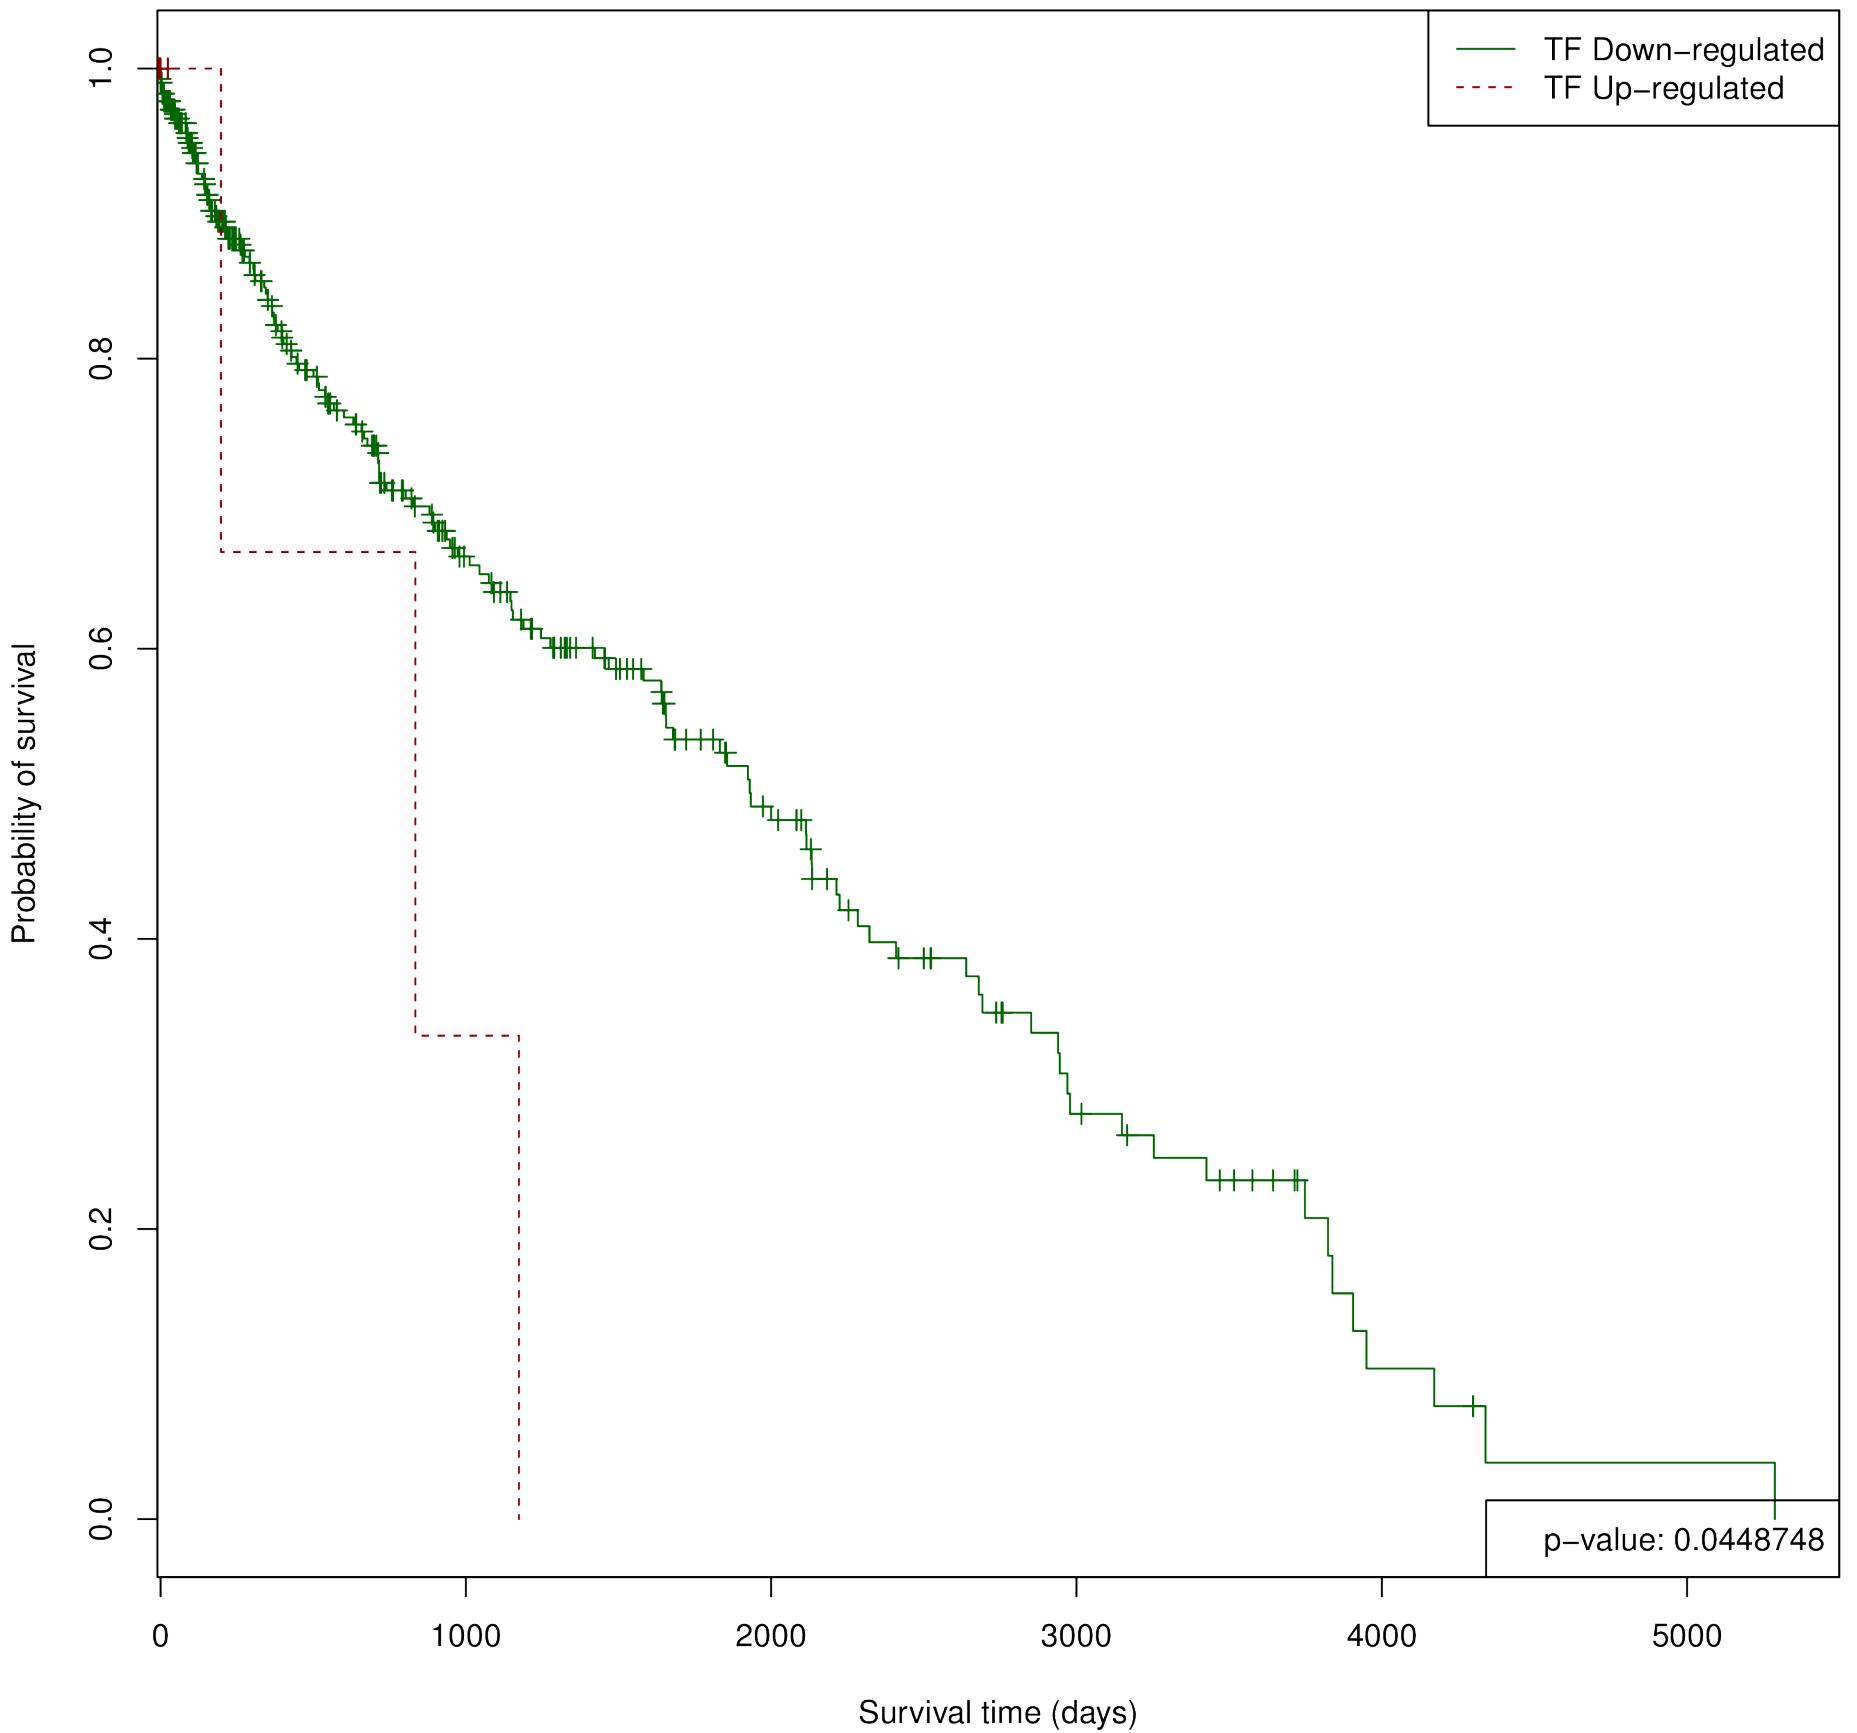

# PAX5 in BLCA

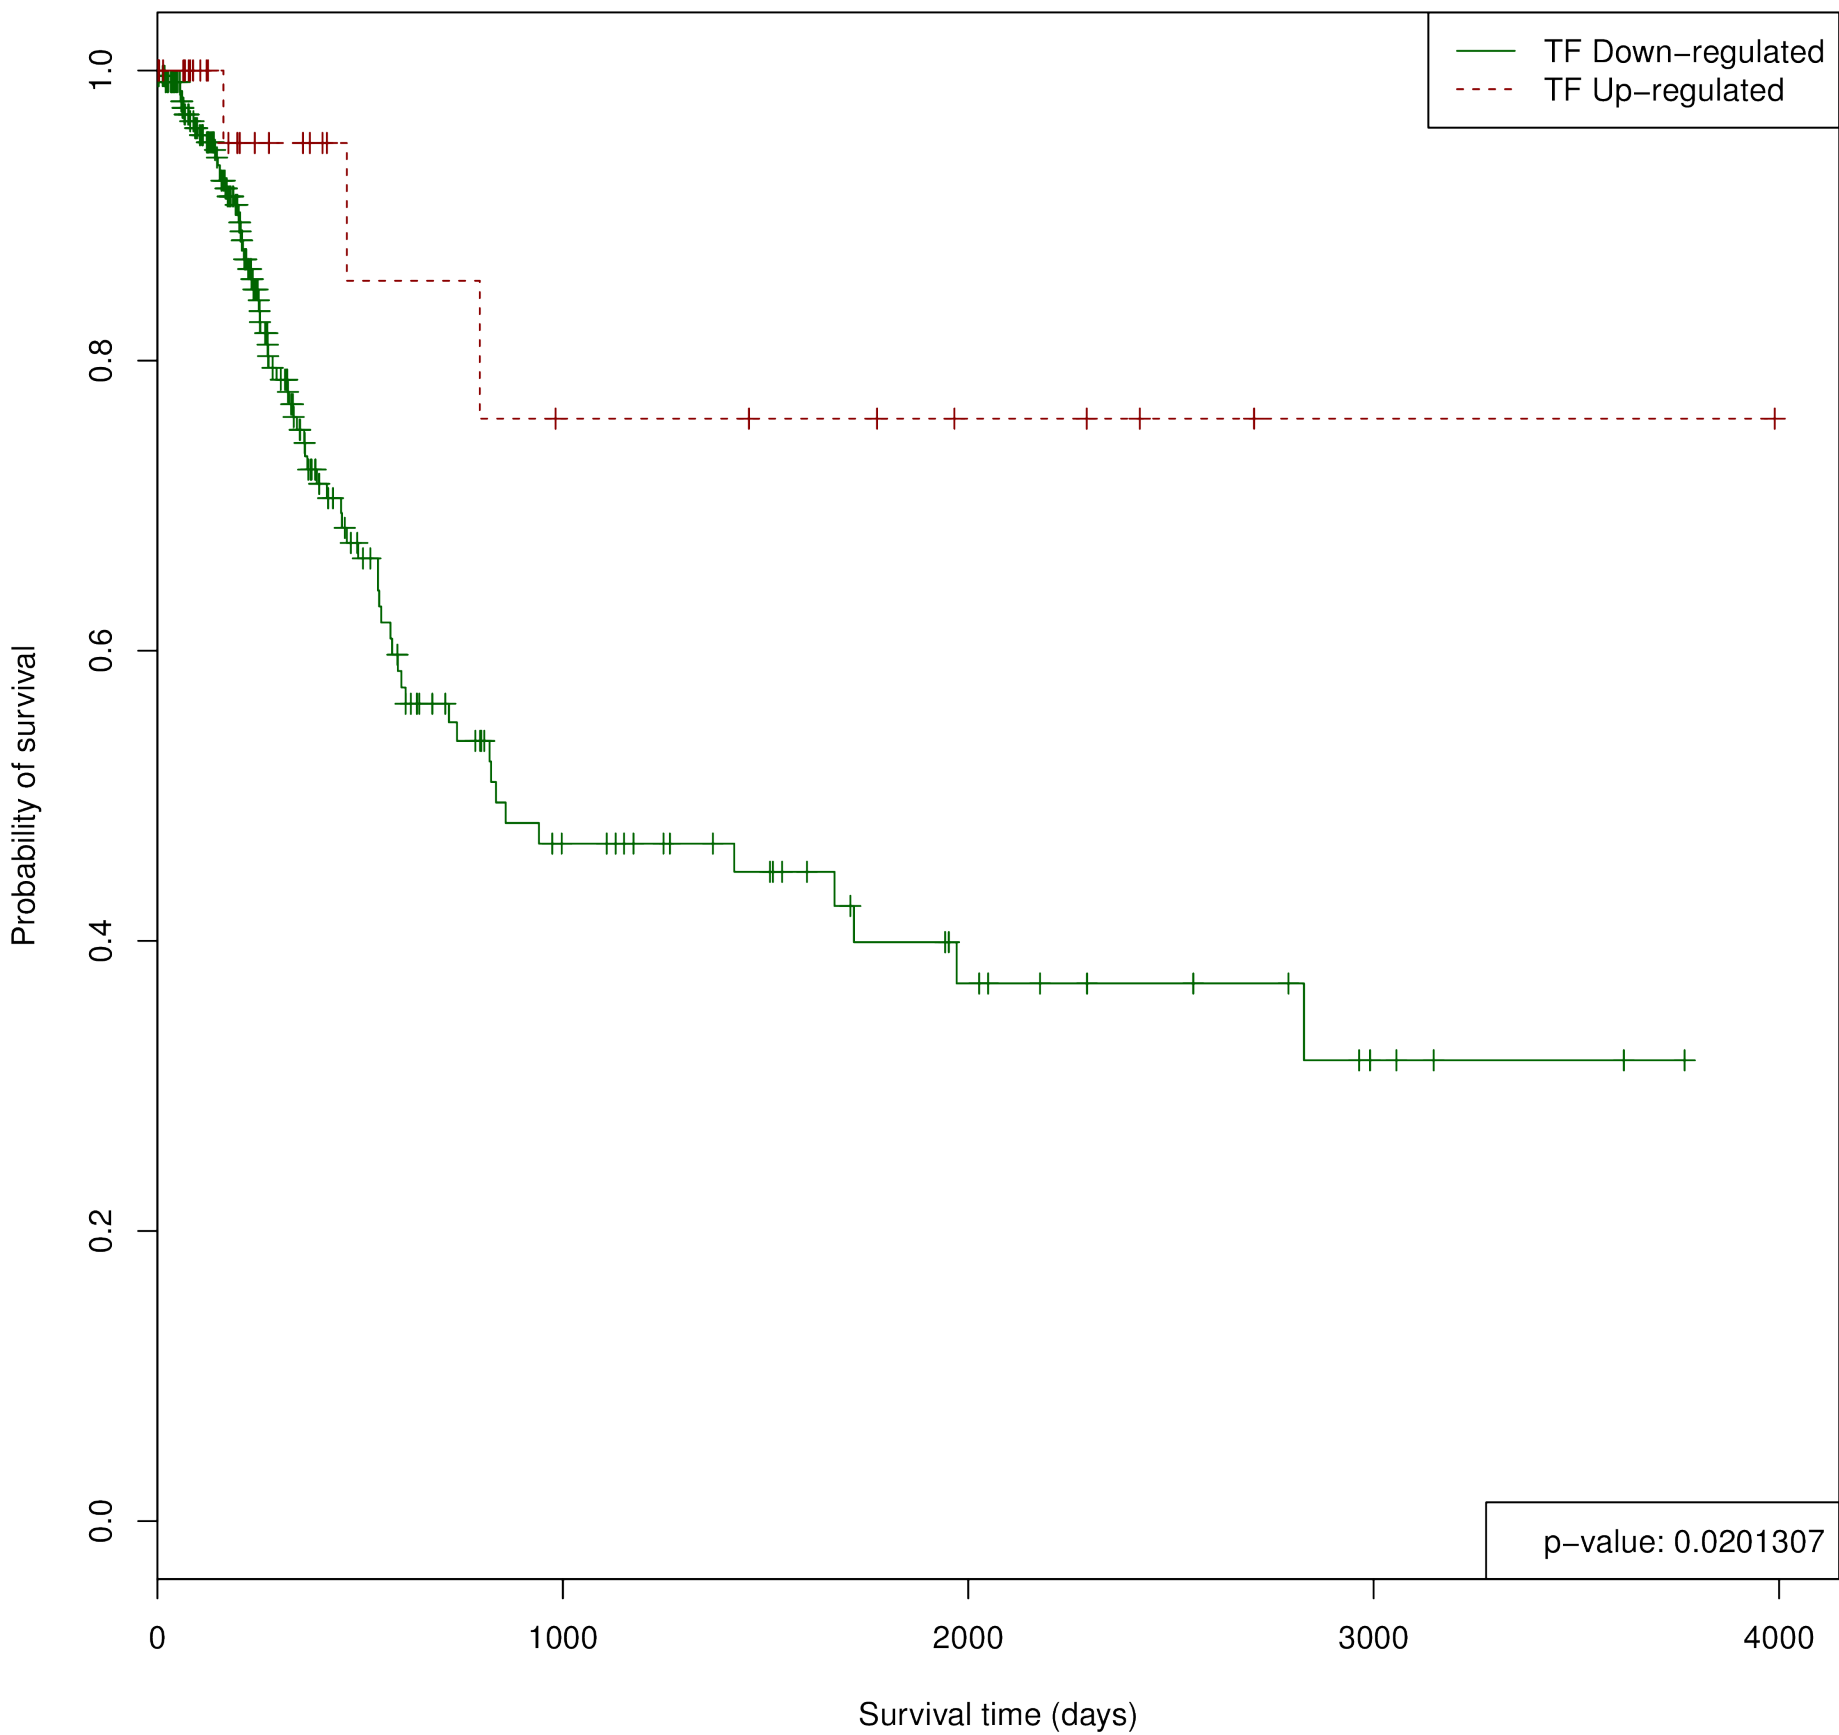

# PAX5 in KIRC

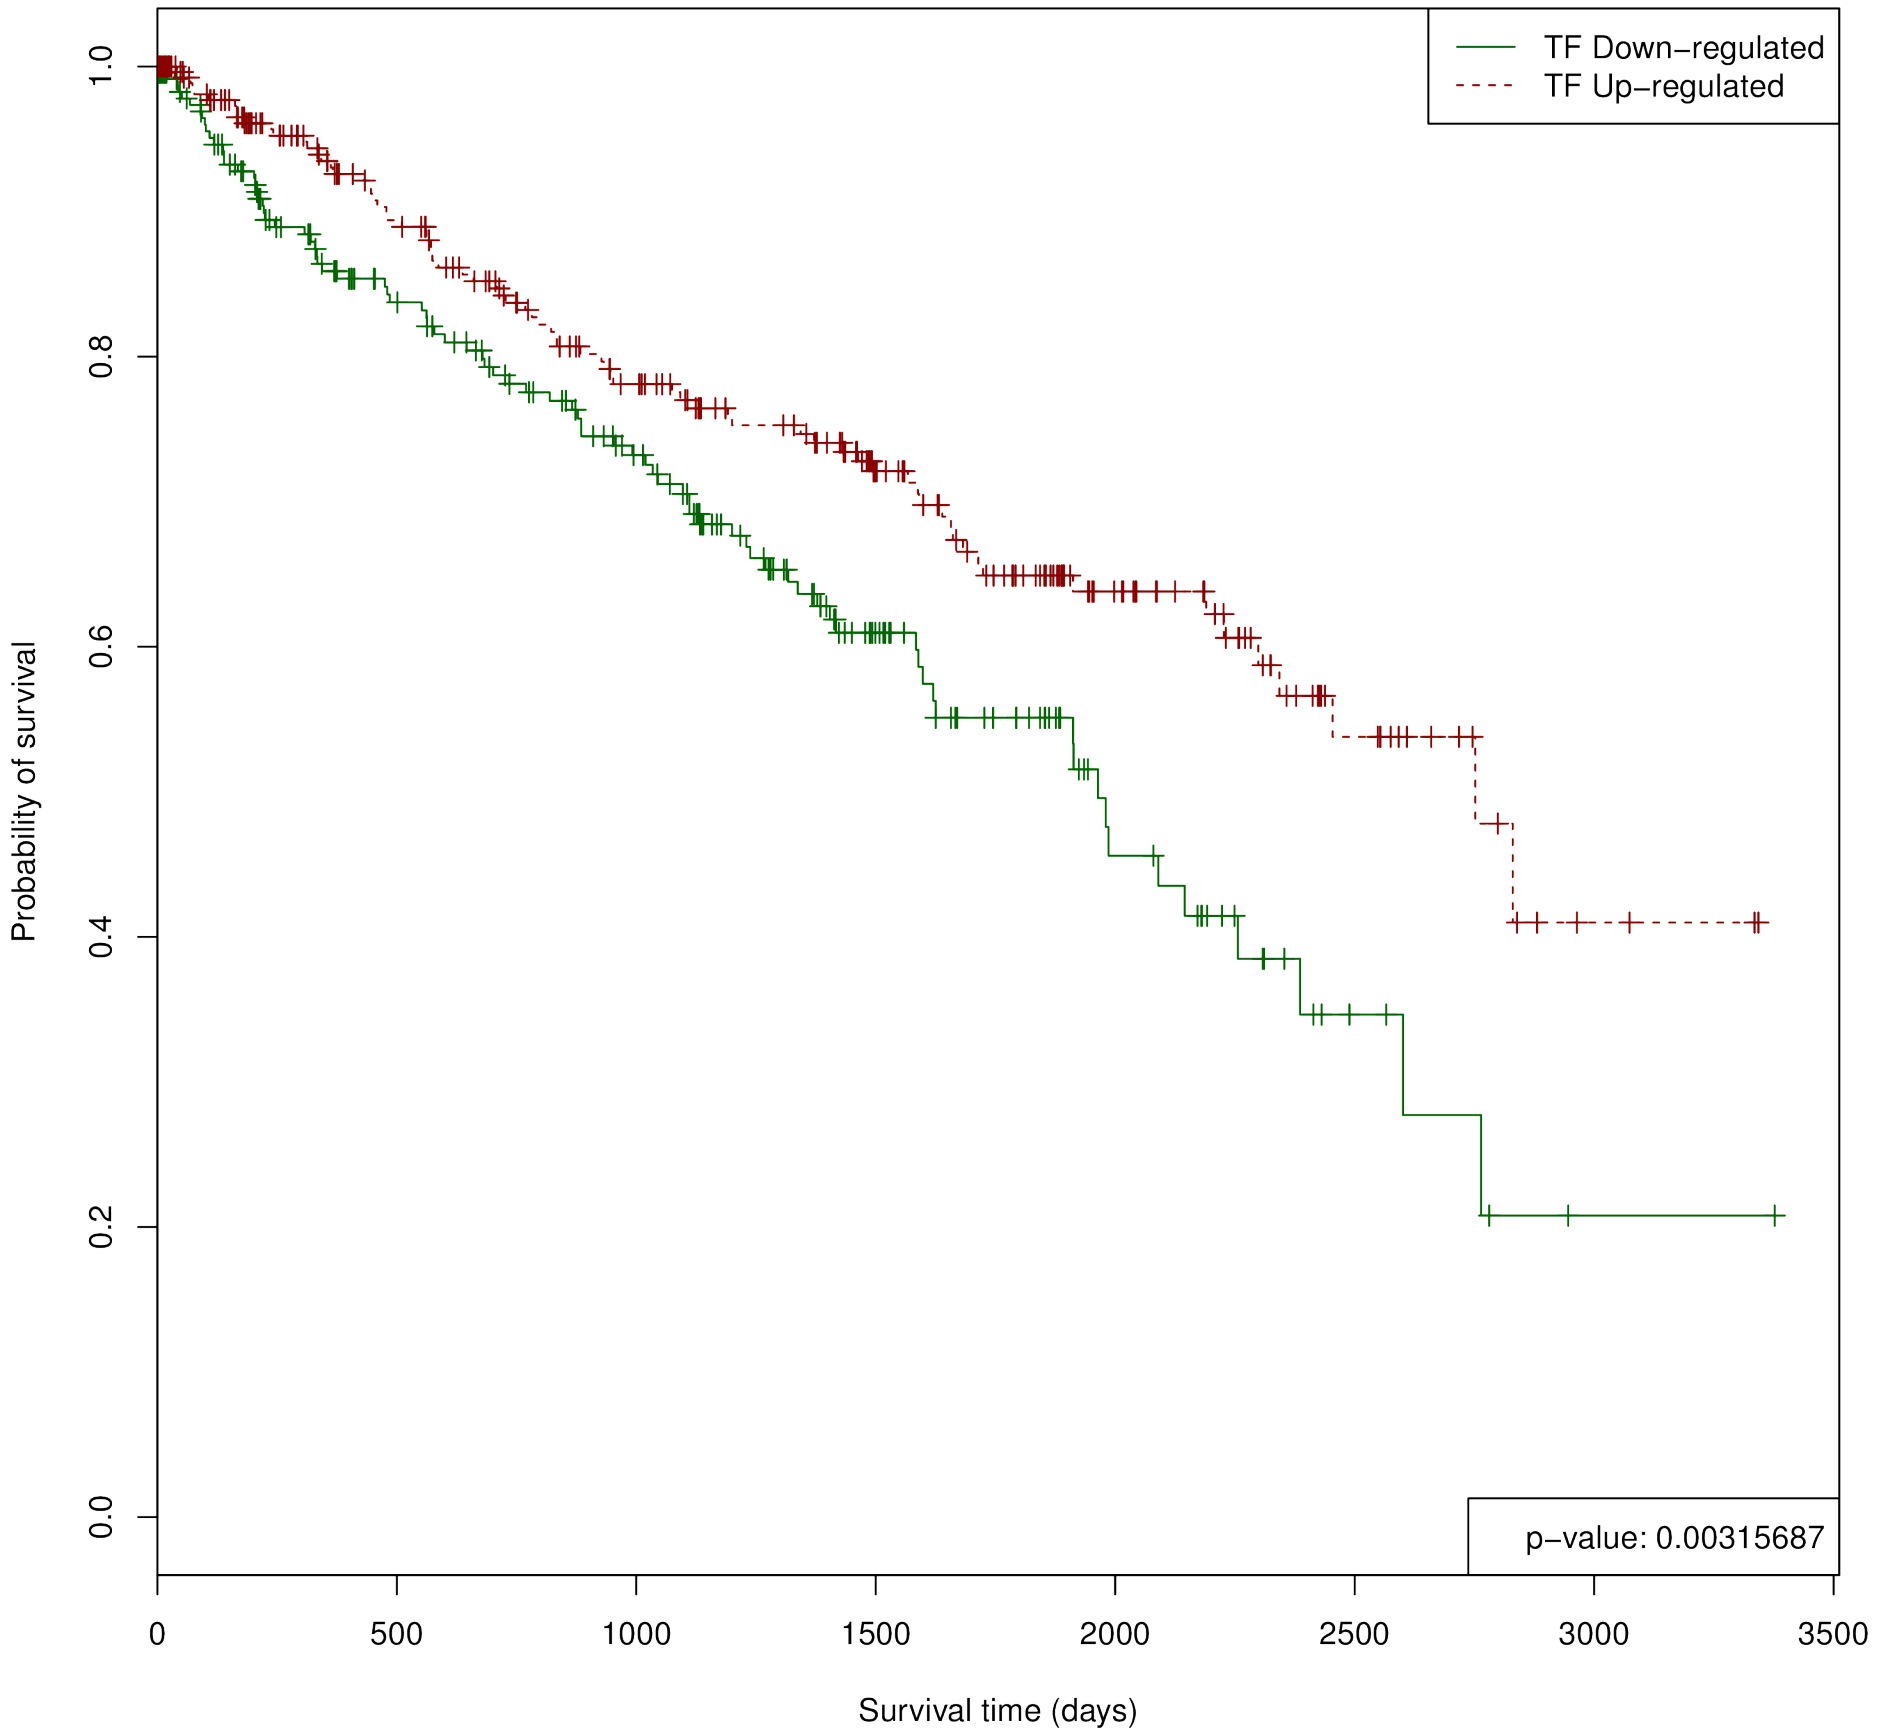



# PAX5 in THCA

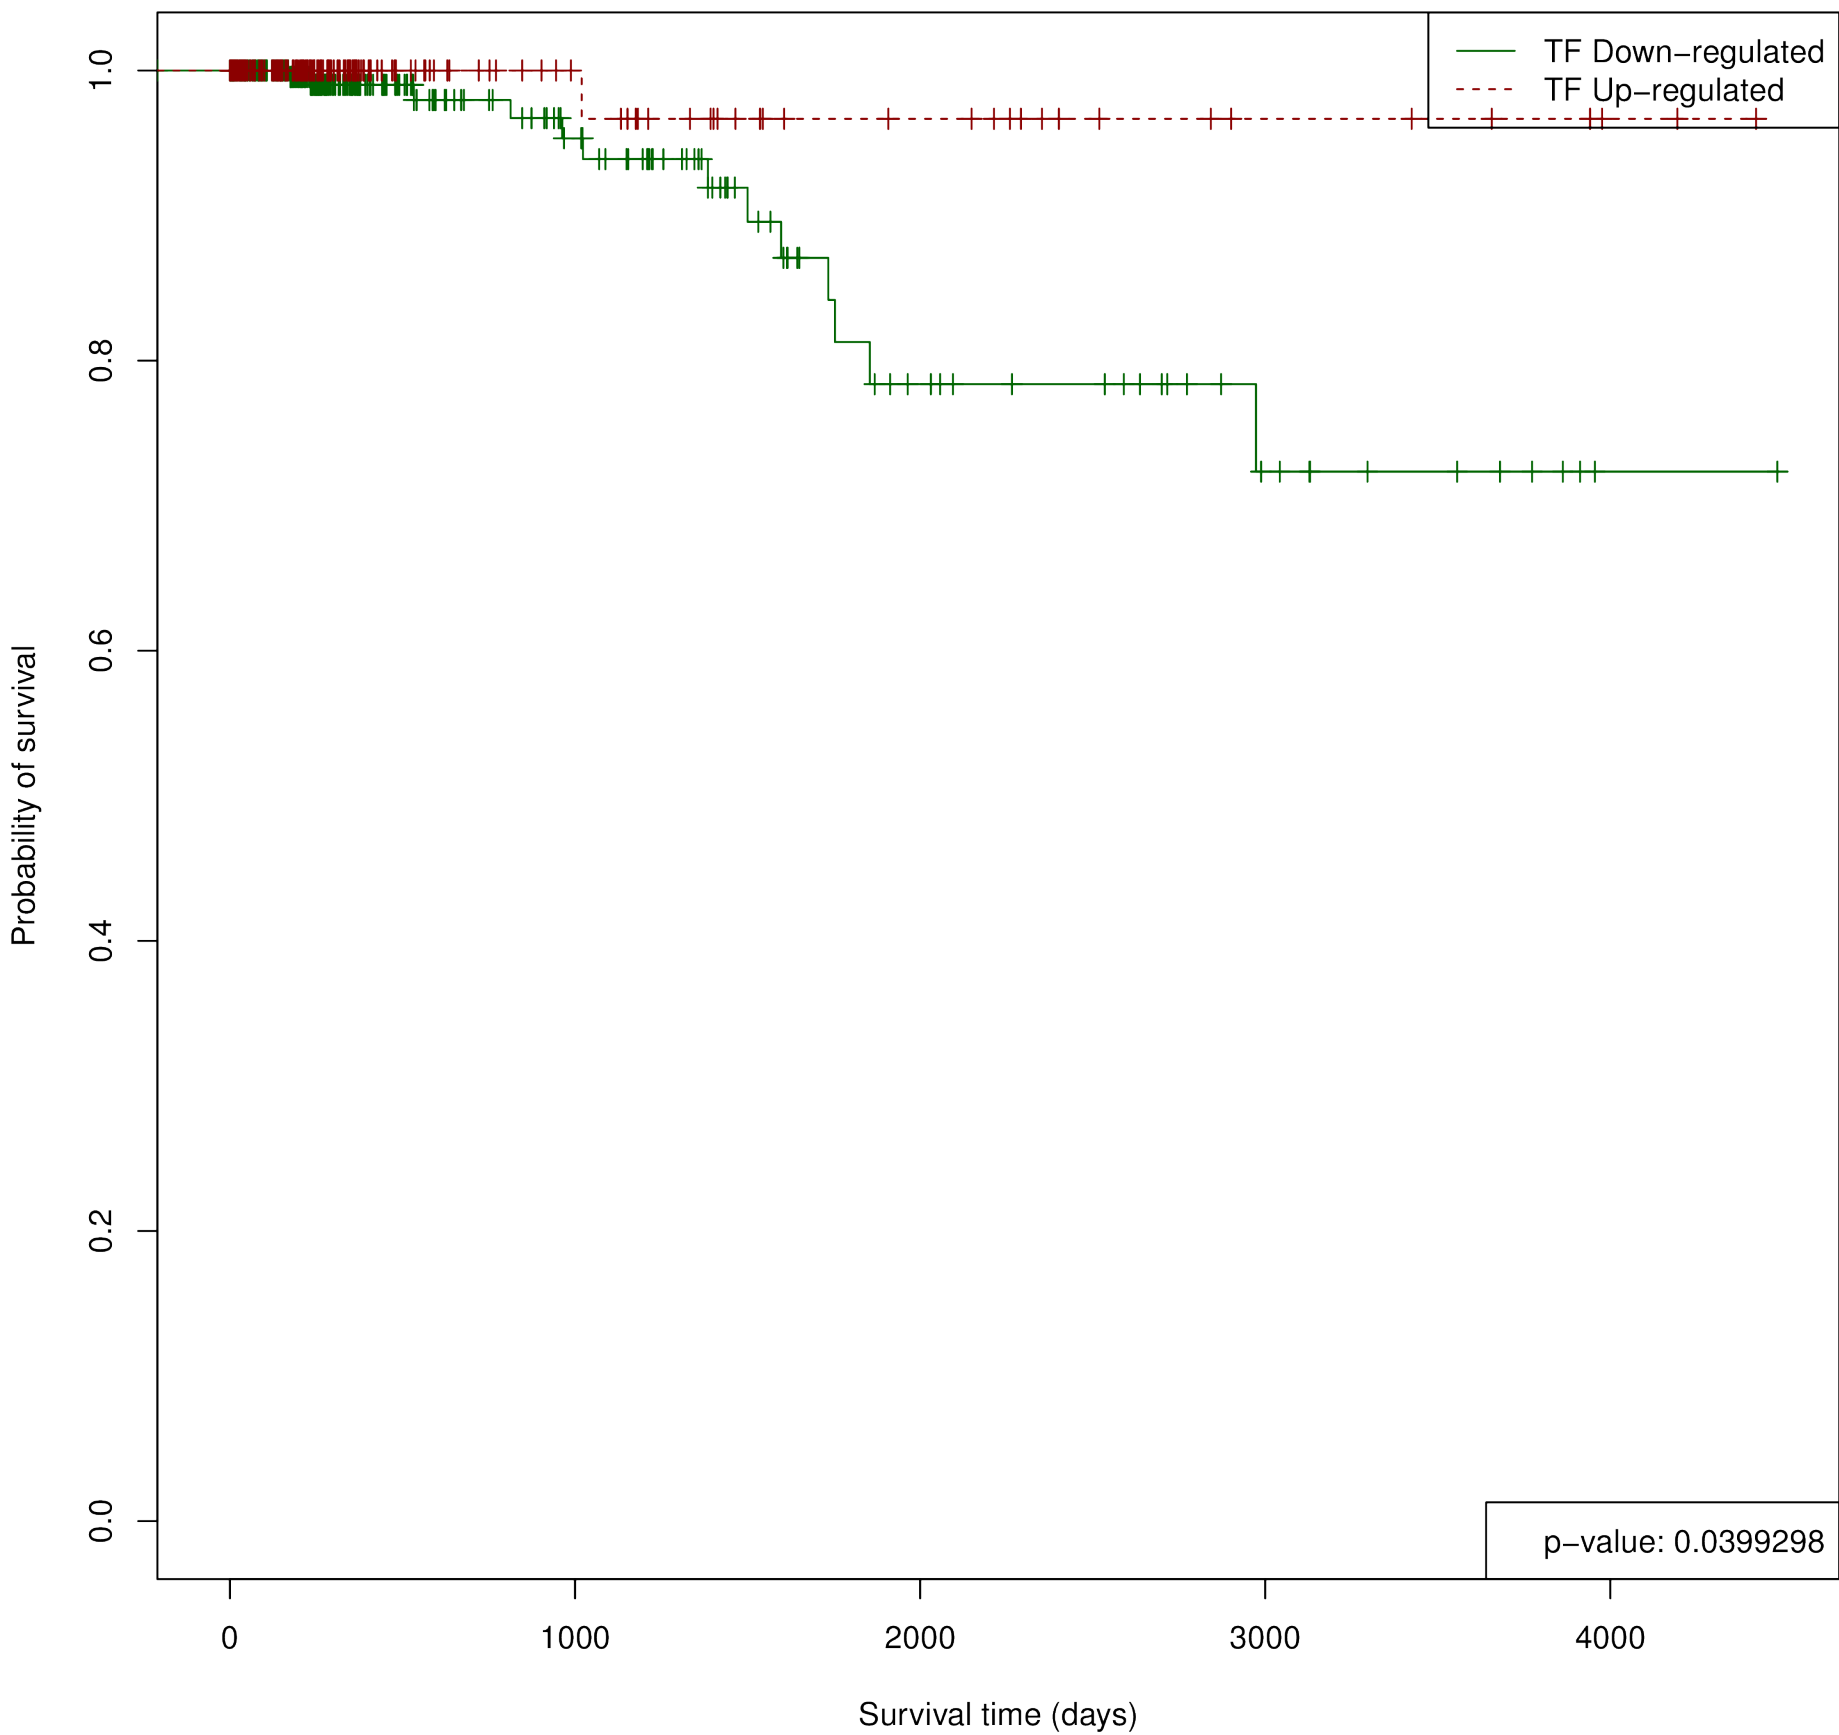

# PAX5 in UCEC

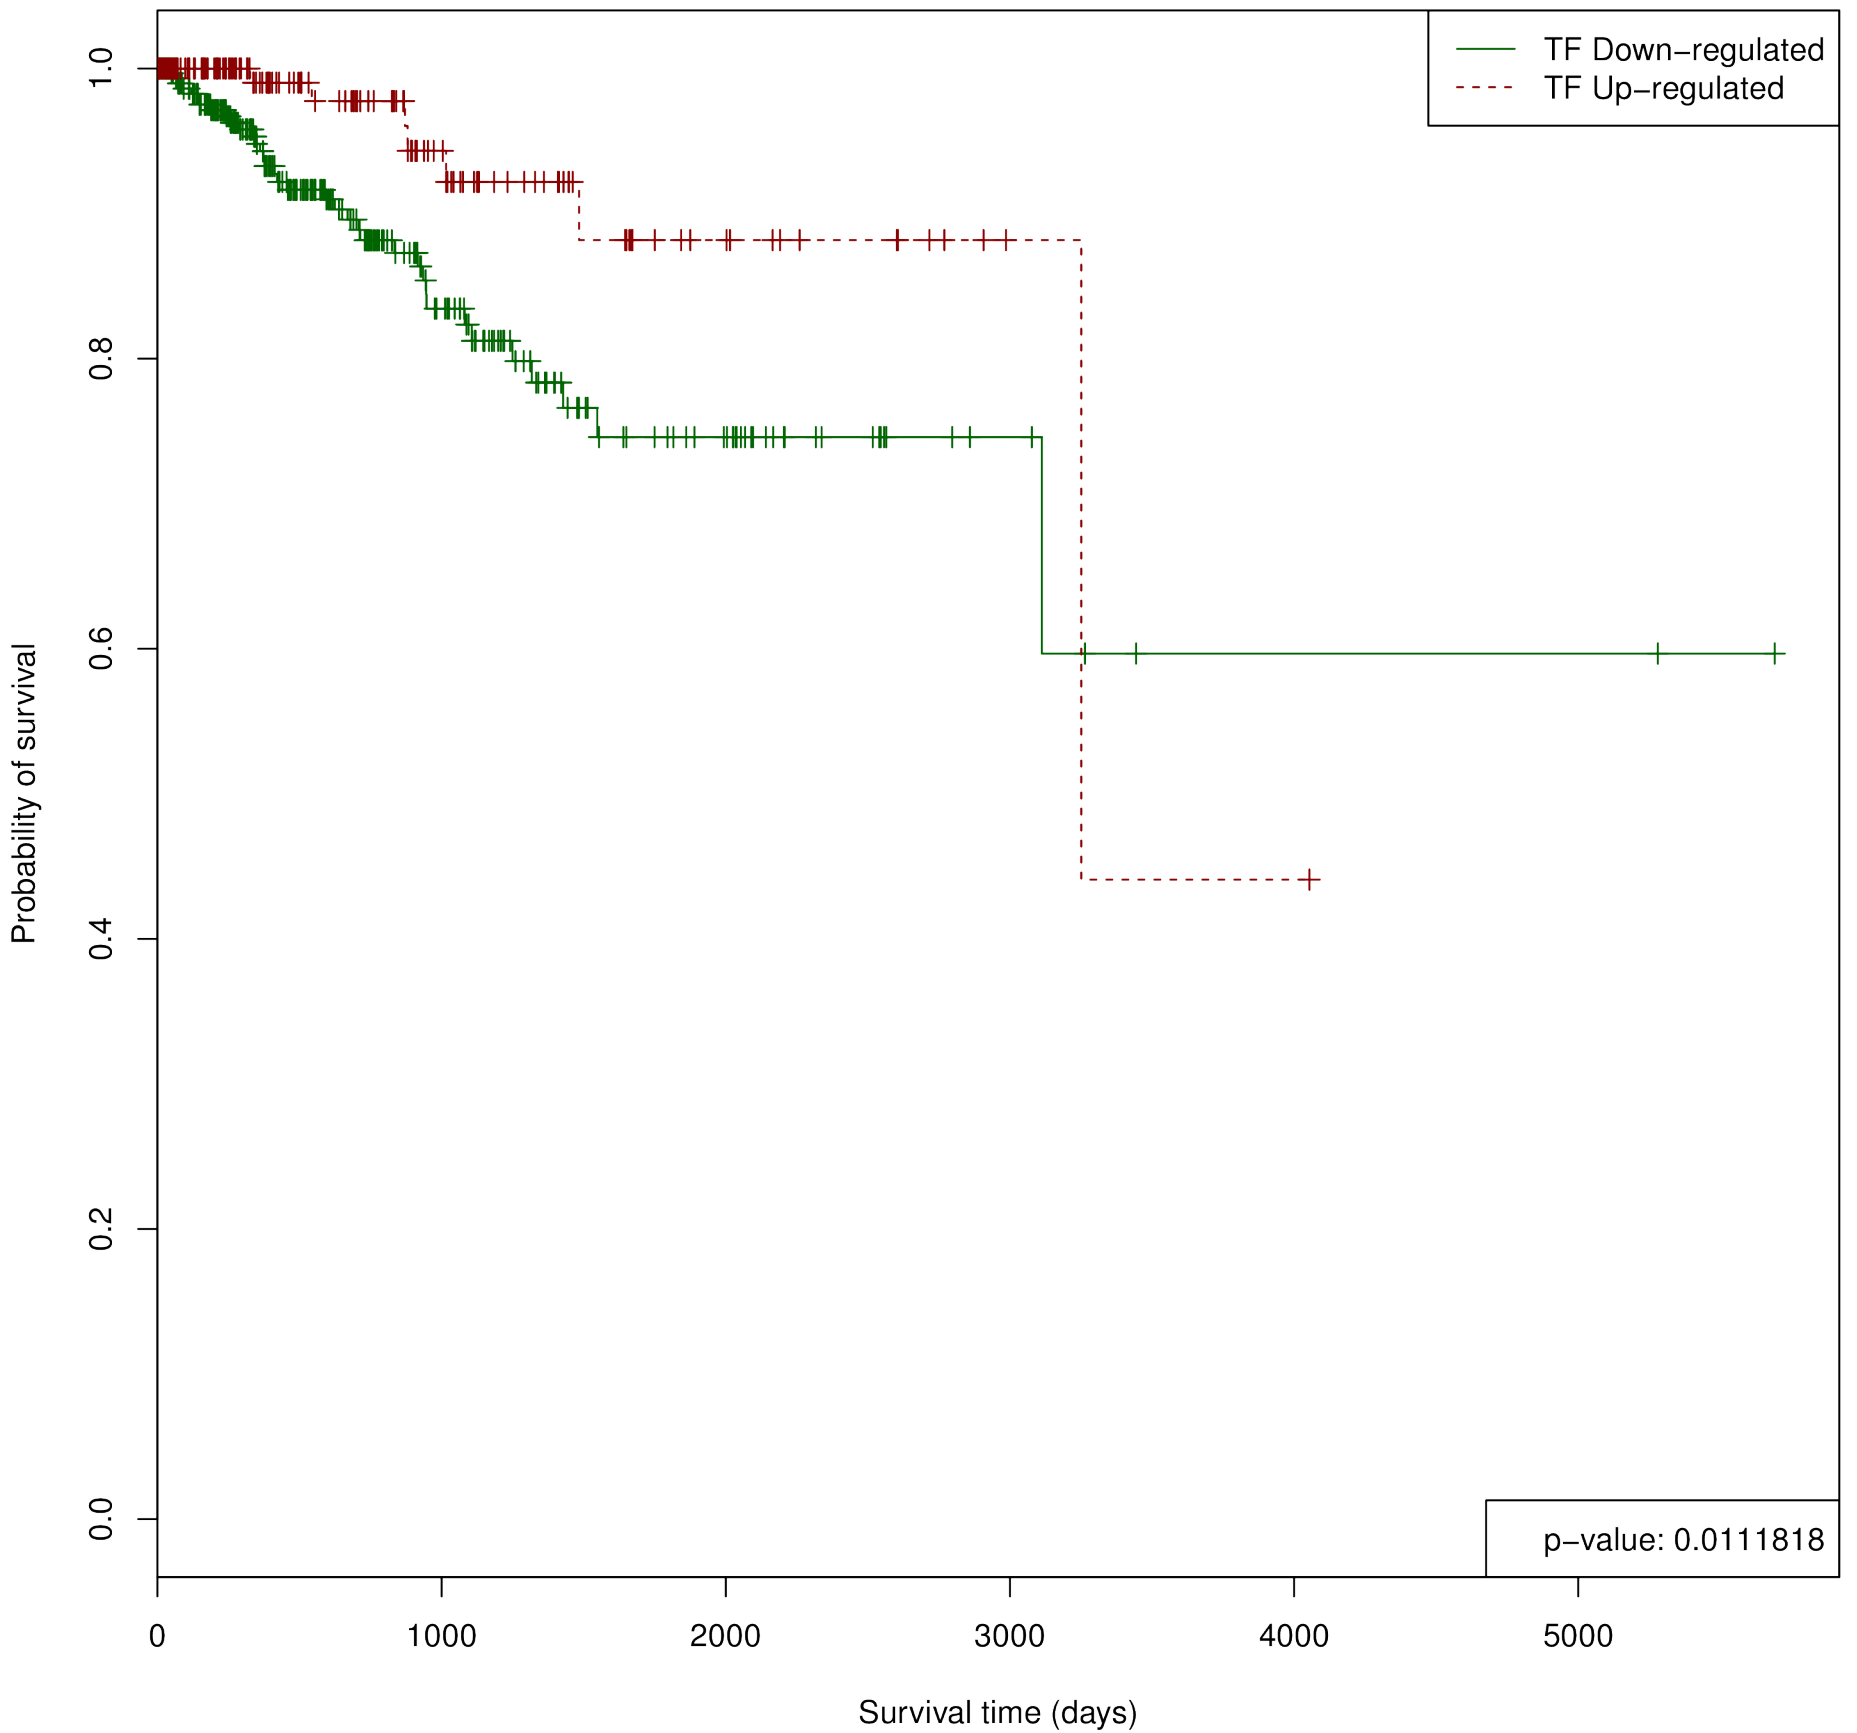

# PBX3 in KIRC

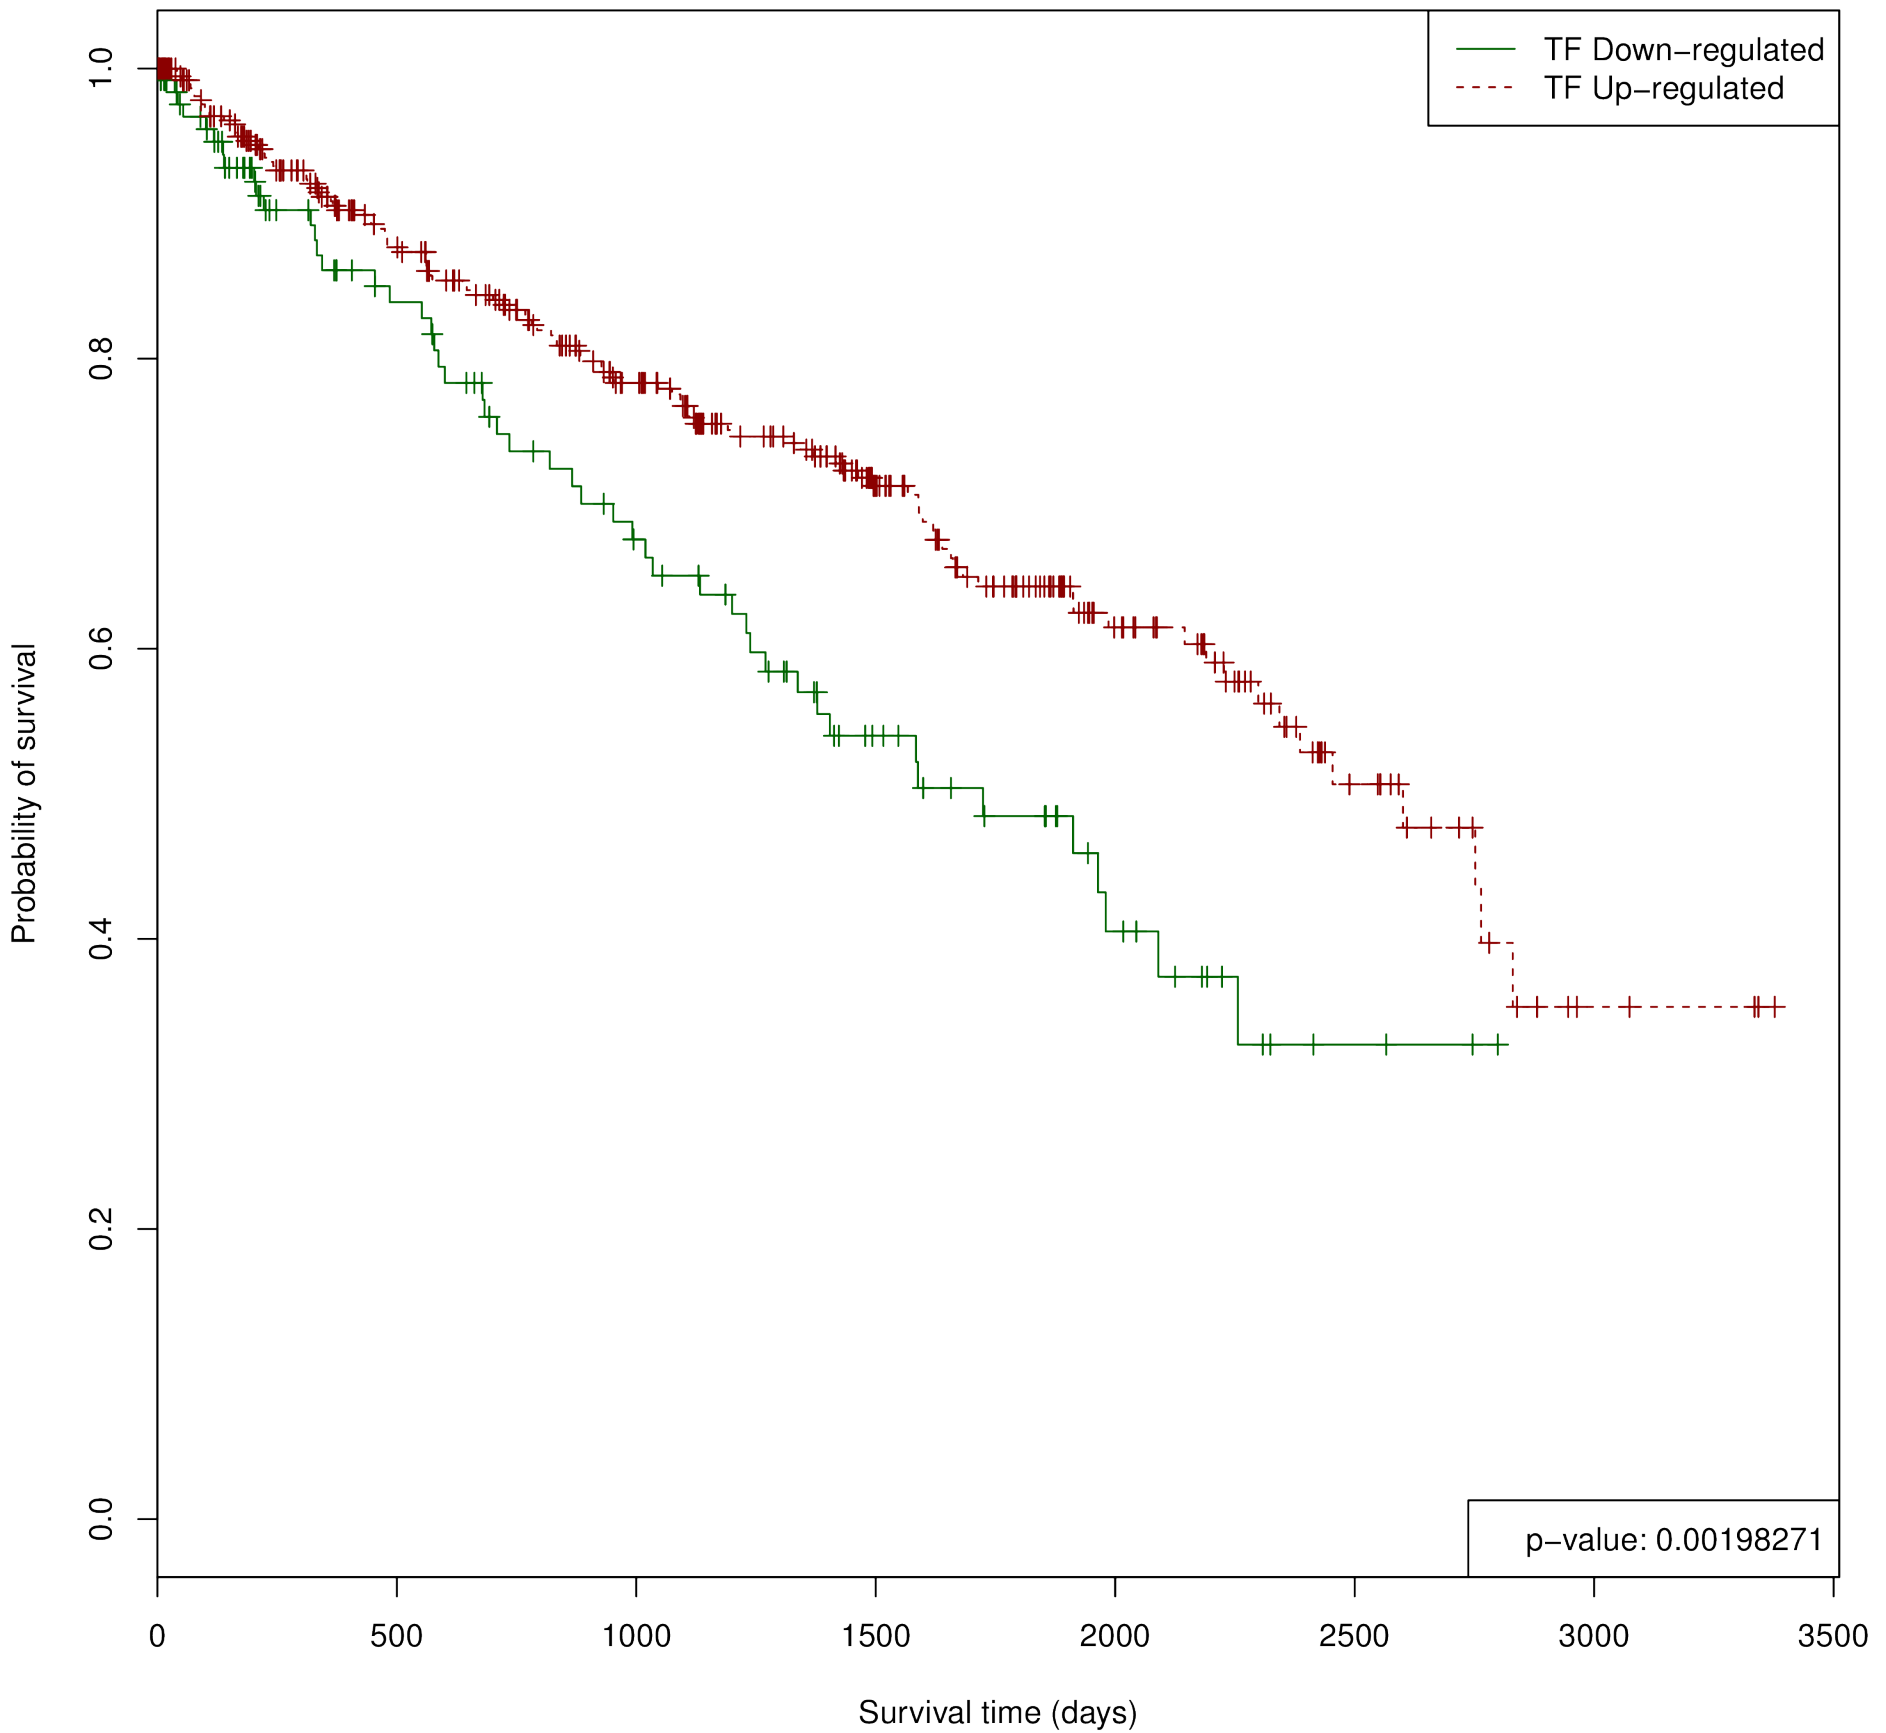

# REST in KIRC

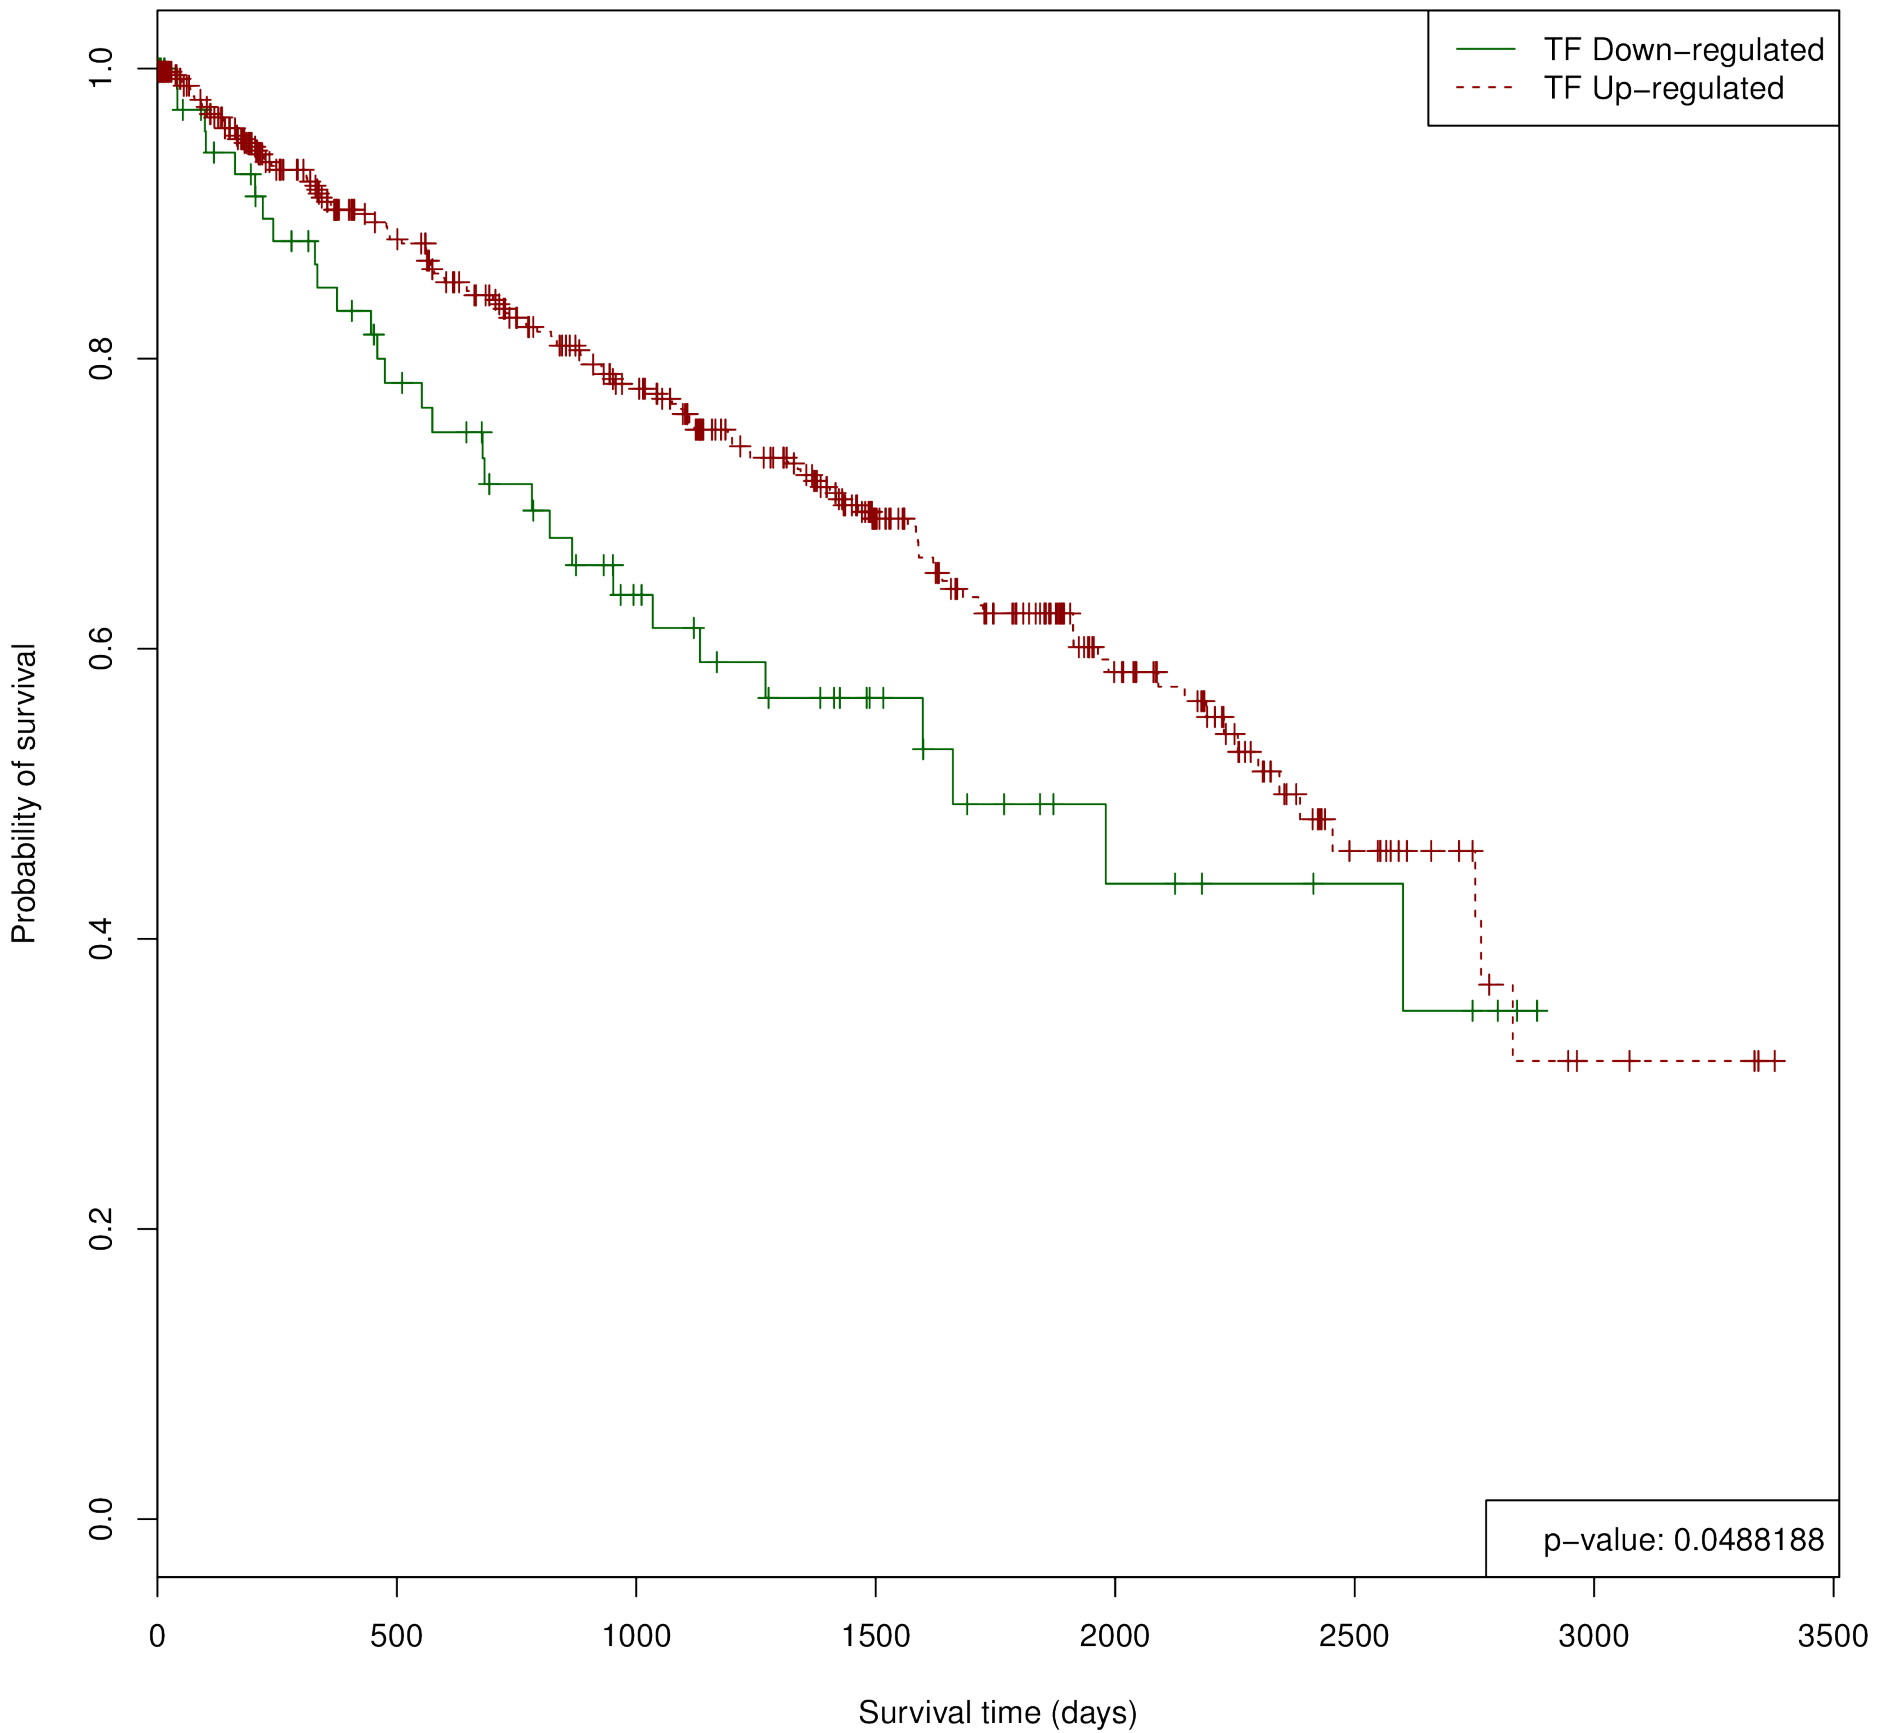

# REST in LUSC

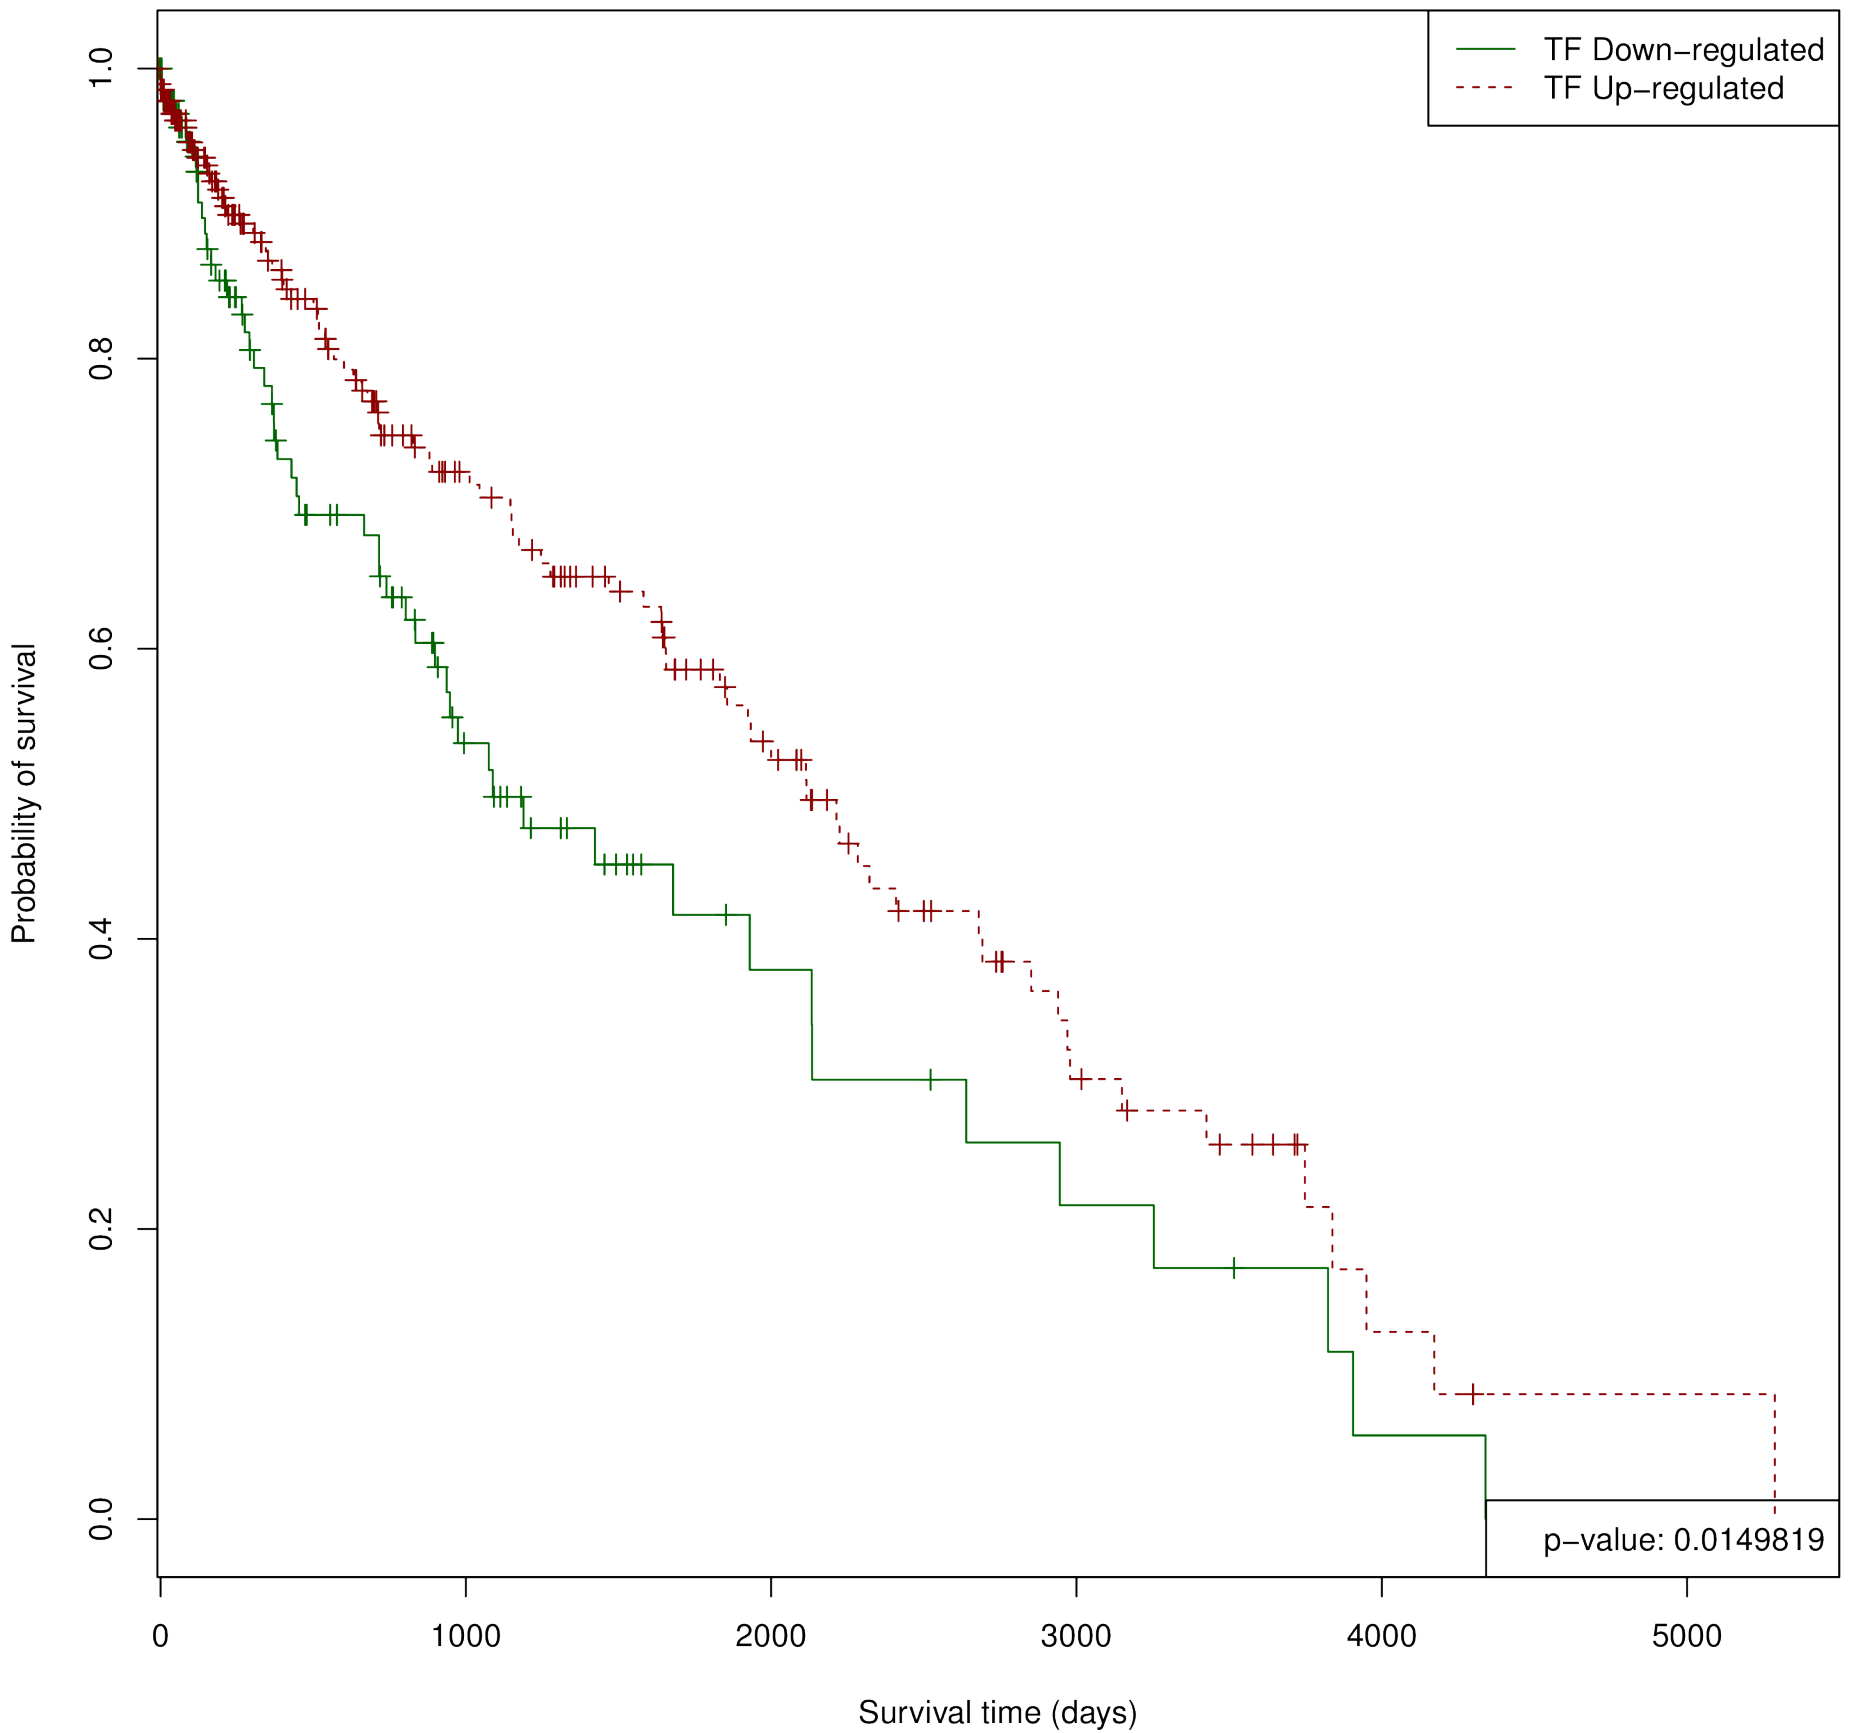

# RXRA in KIRP

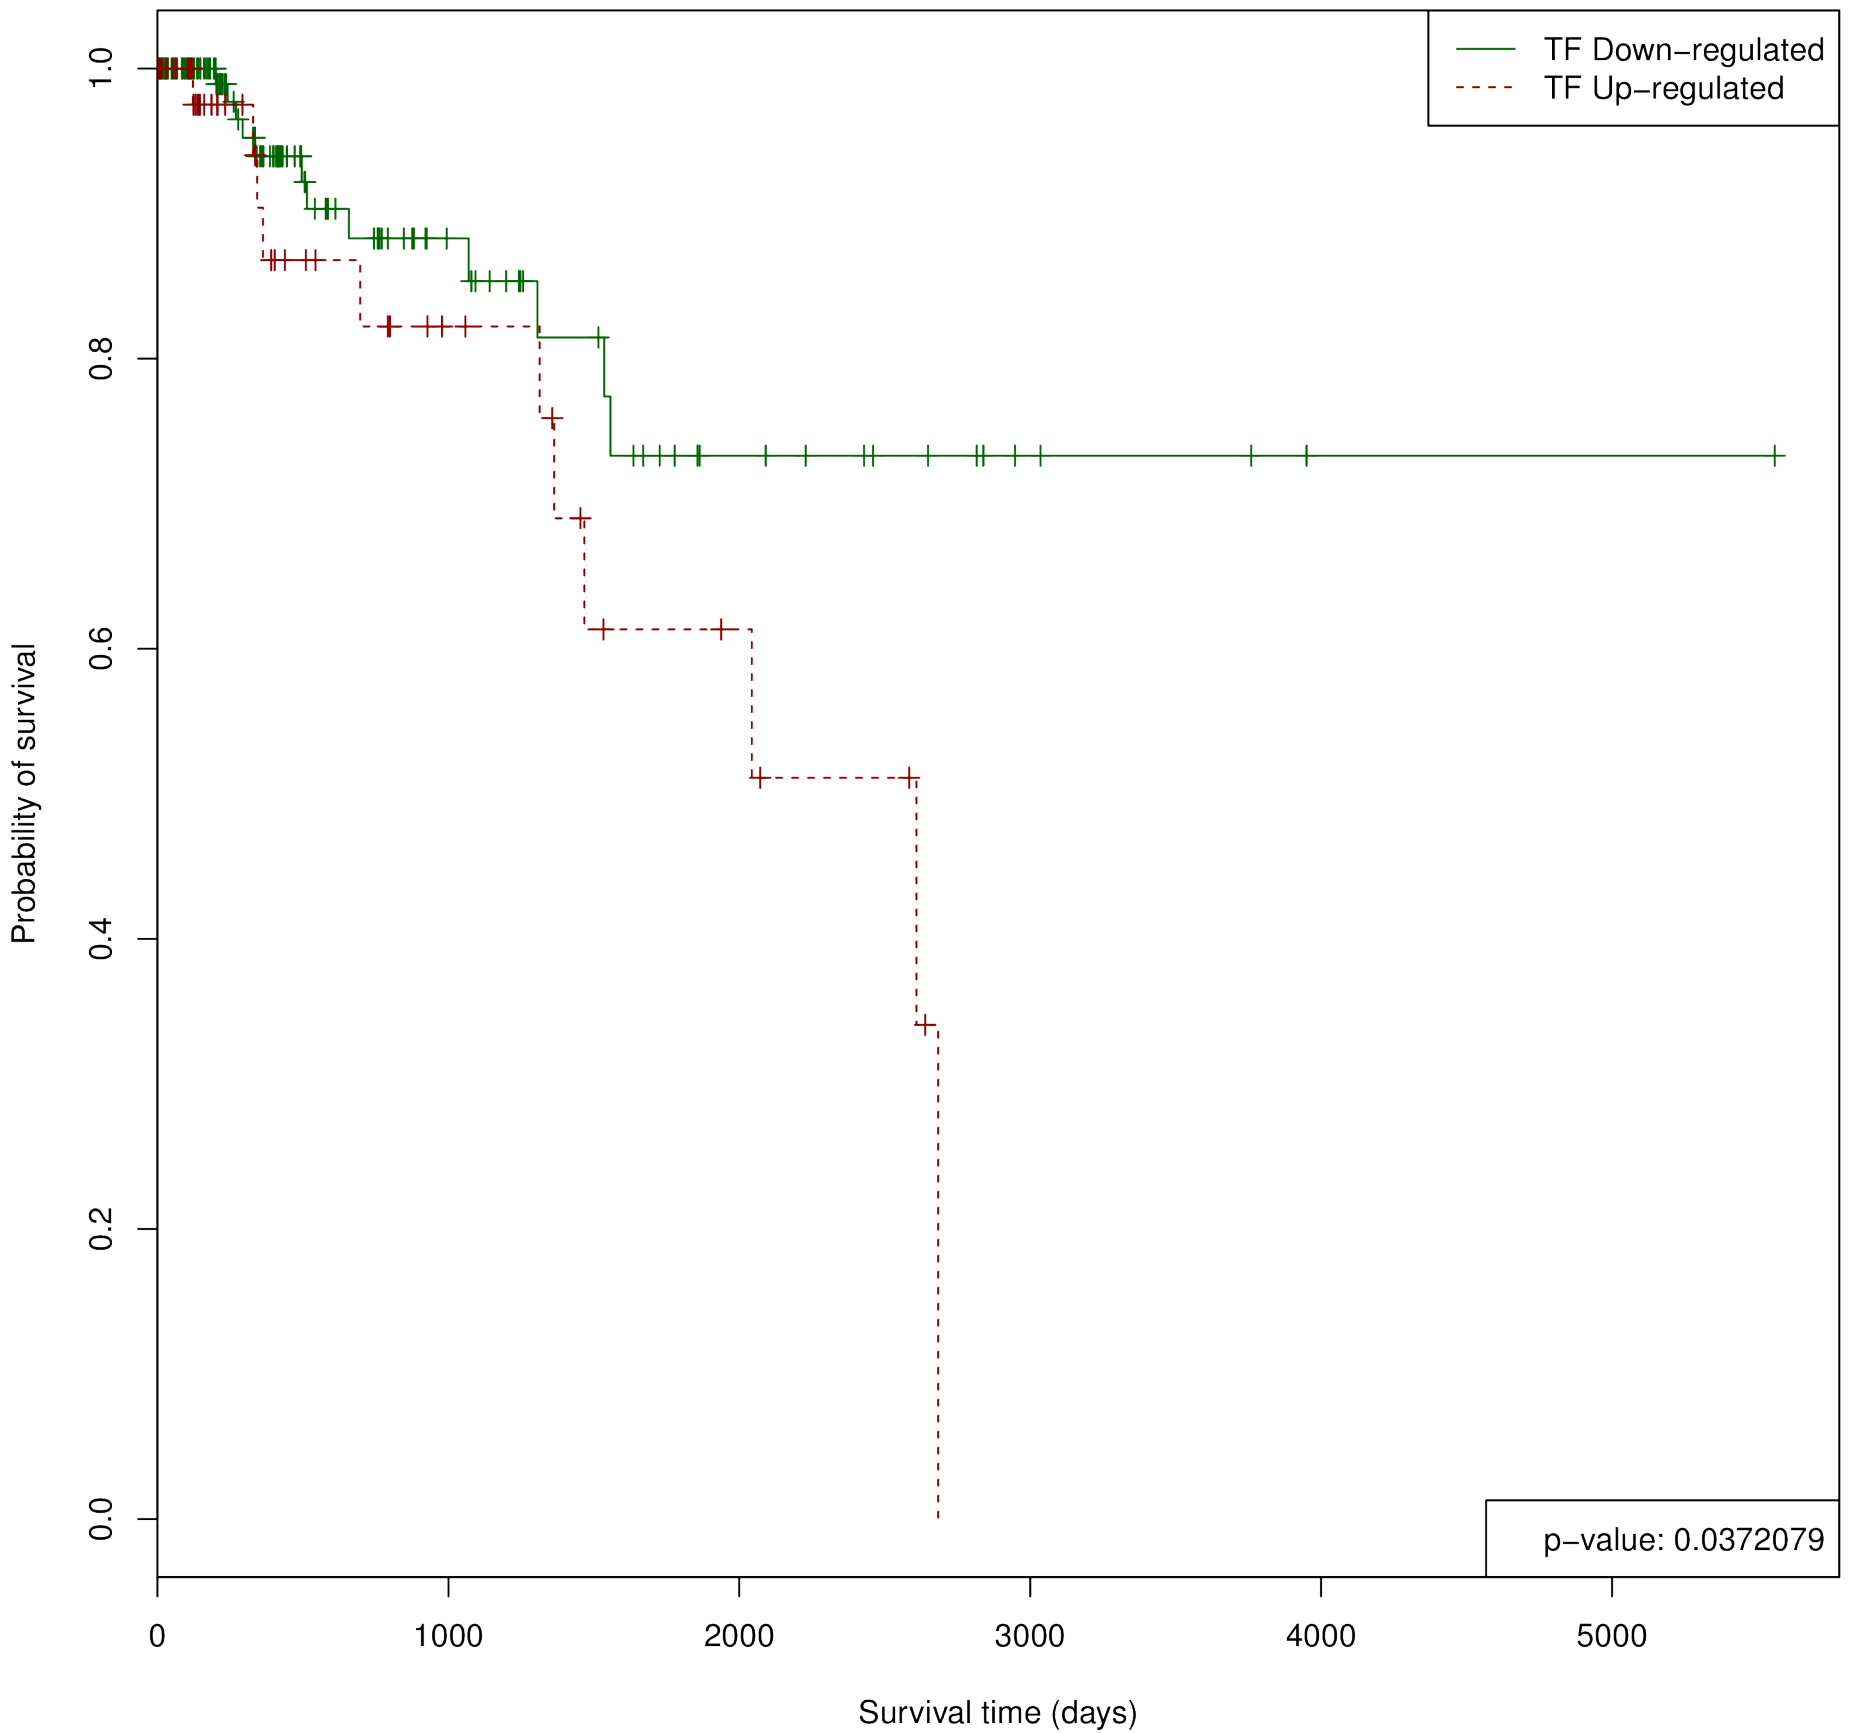

# RXRA in THCA

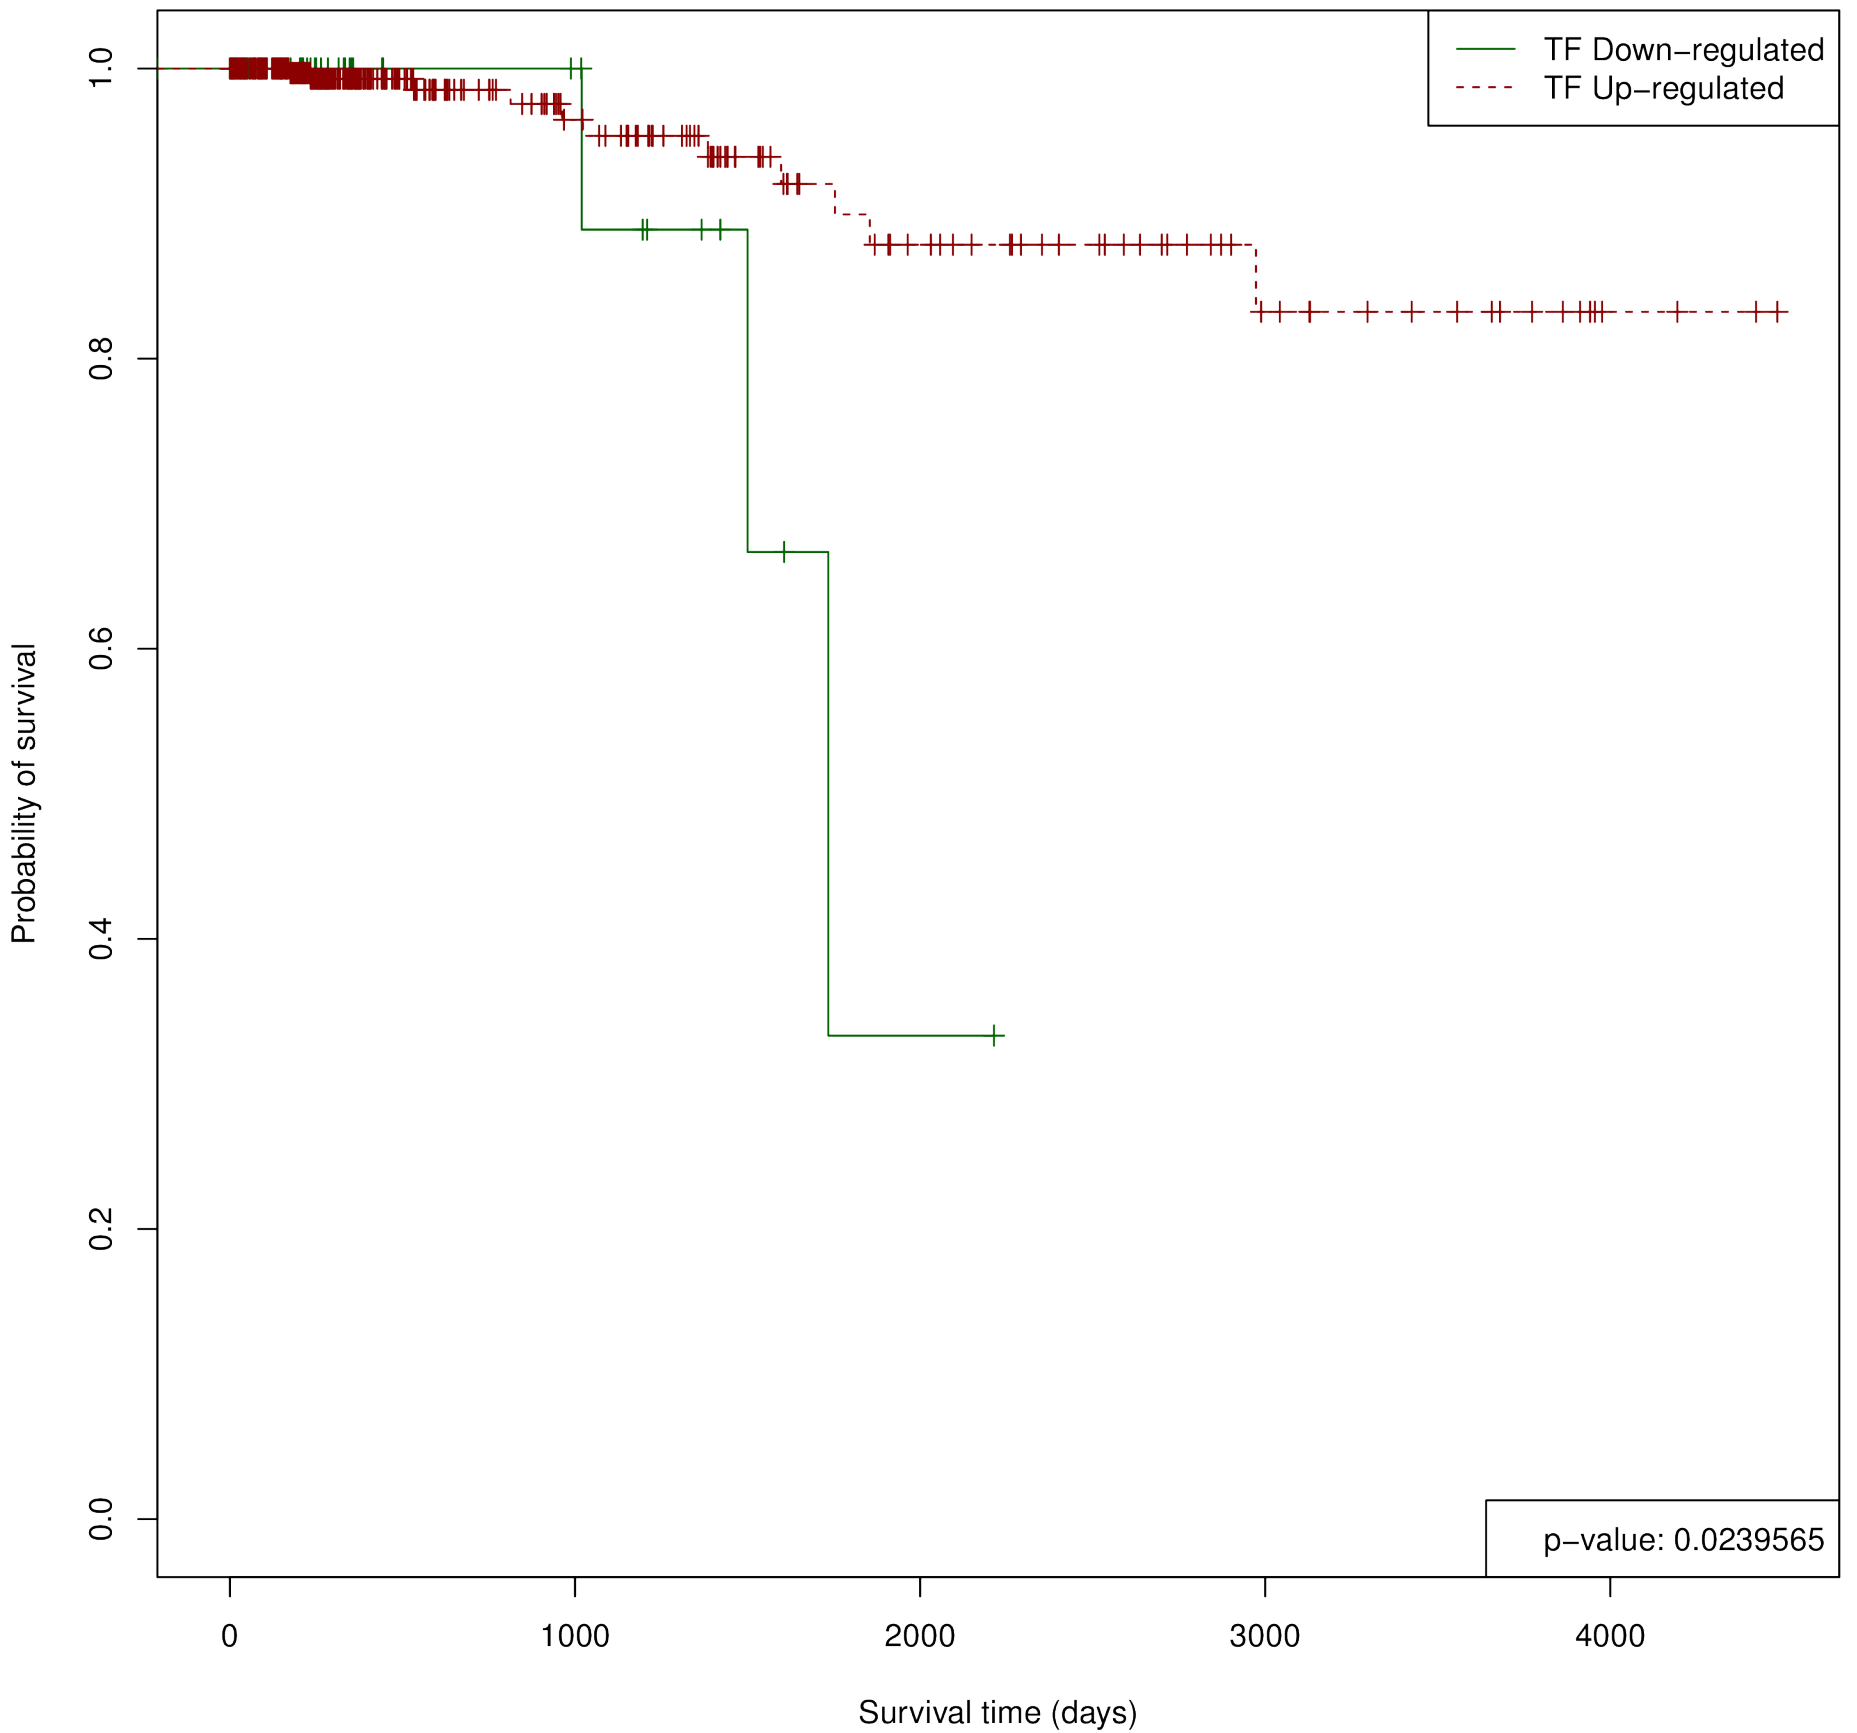

# RXRA::VDR in KIRC

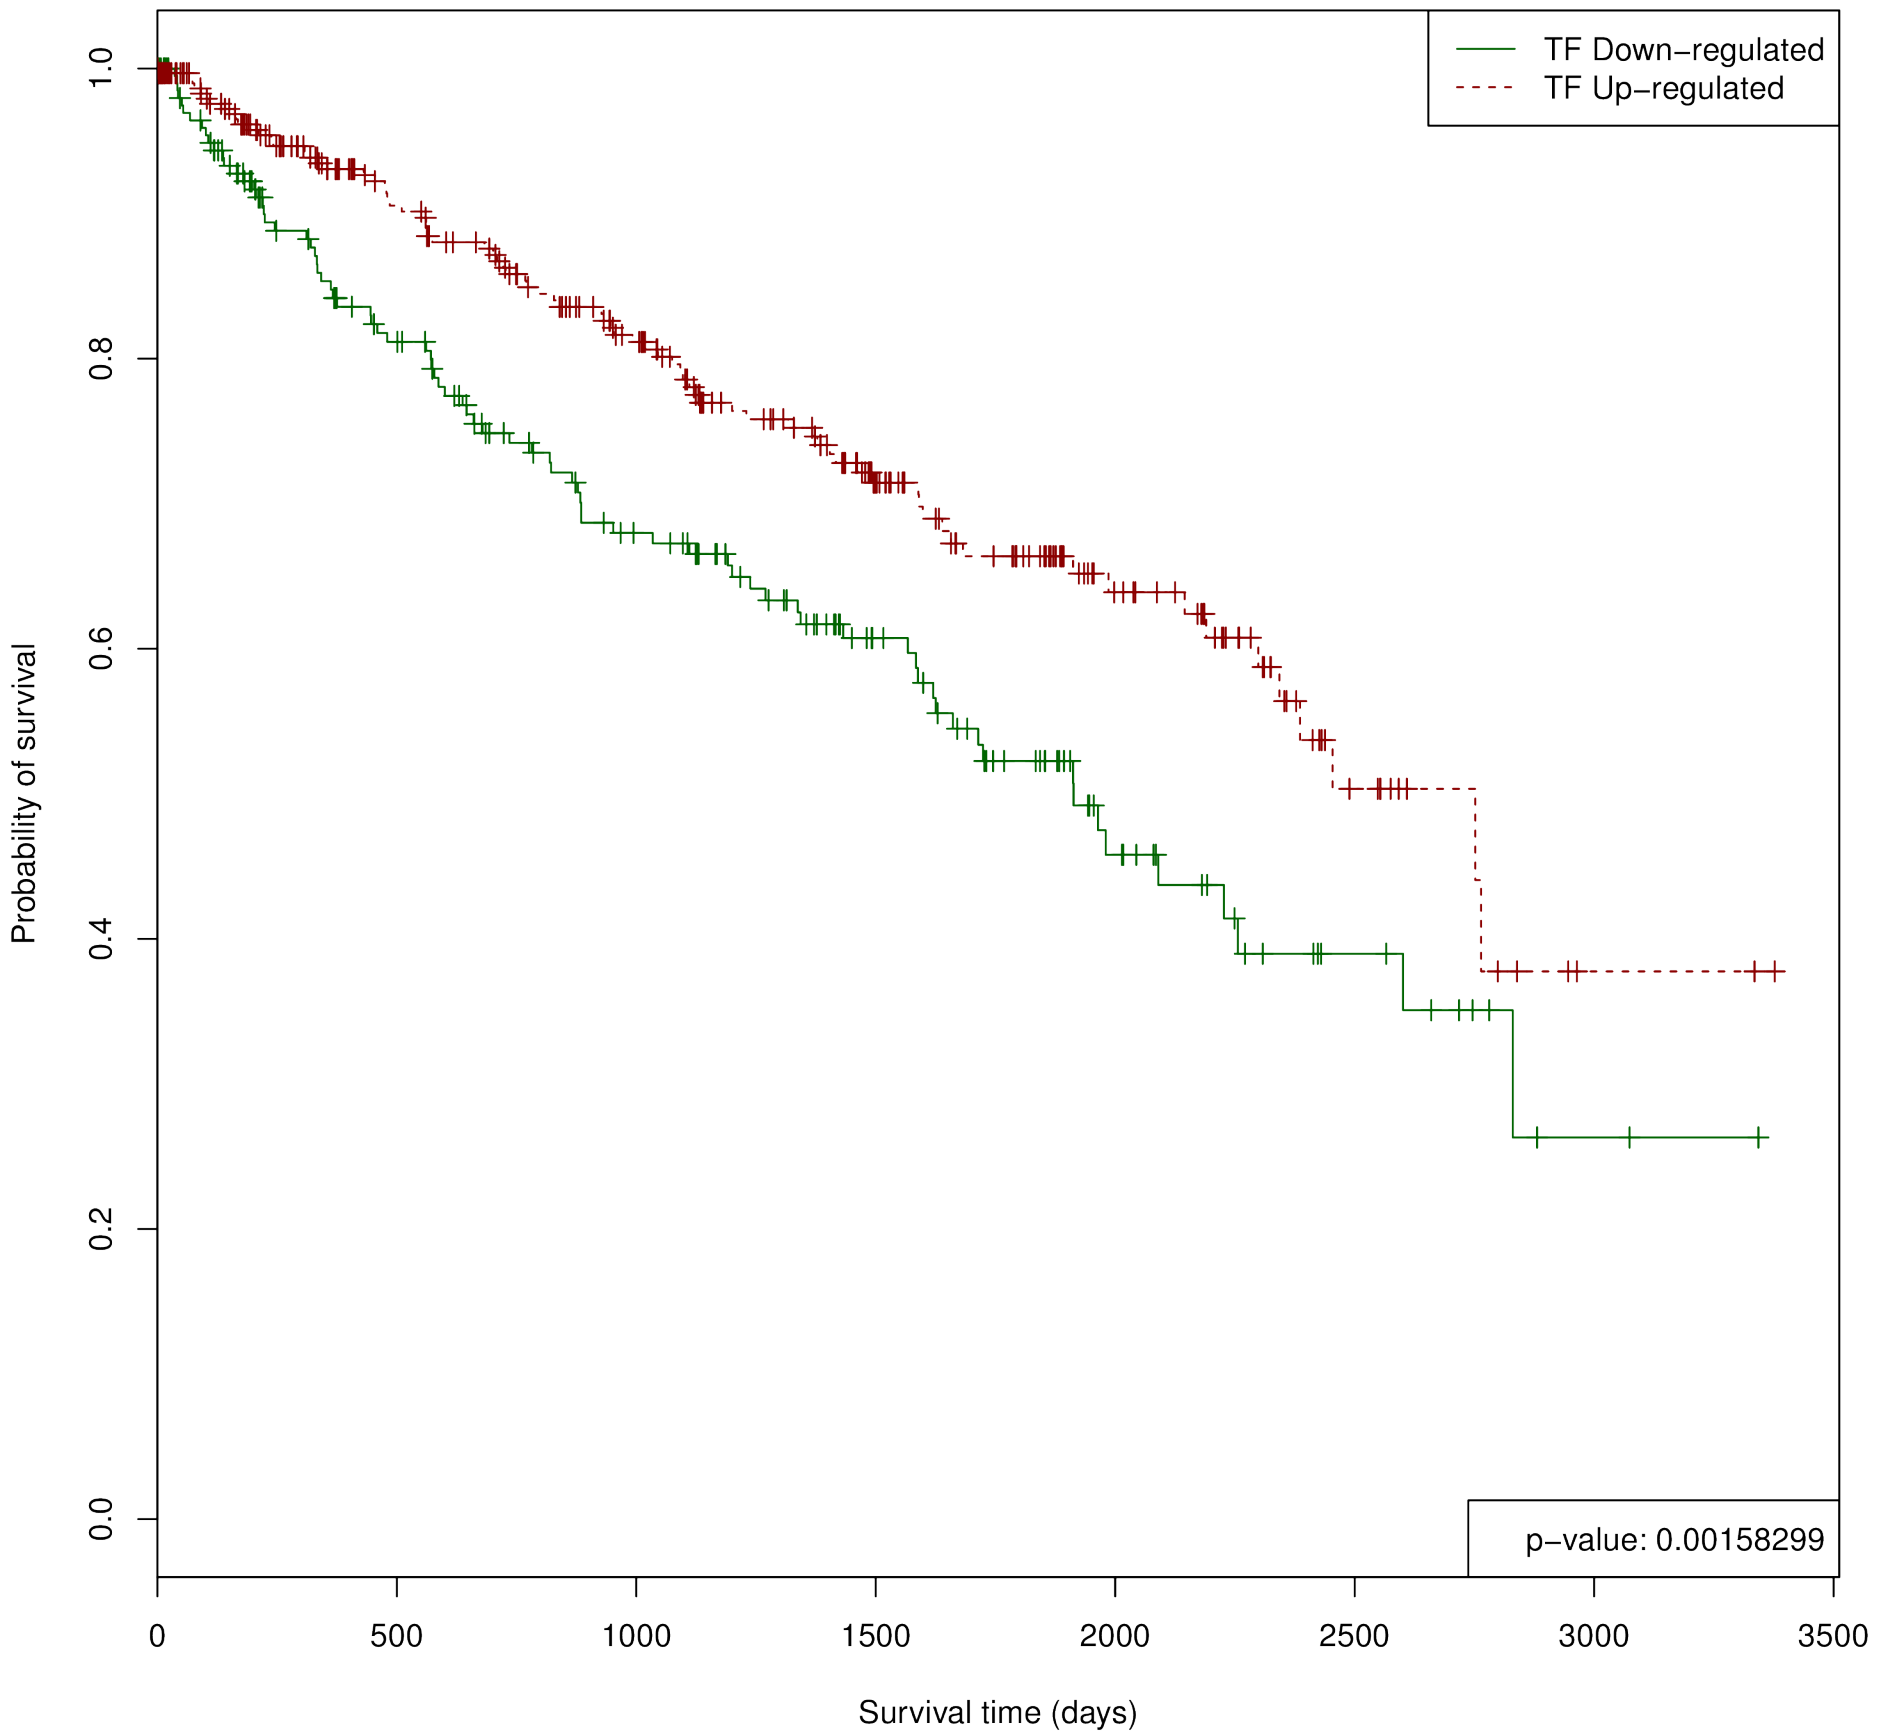



# RXRA::VDR in THCA

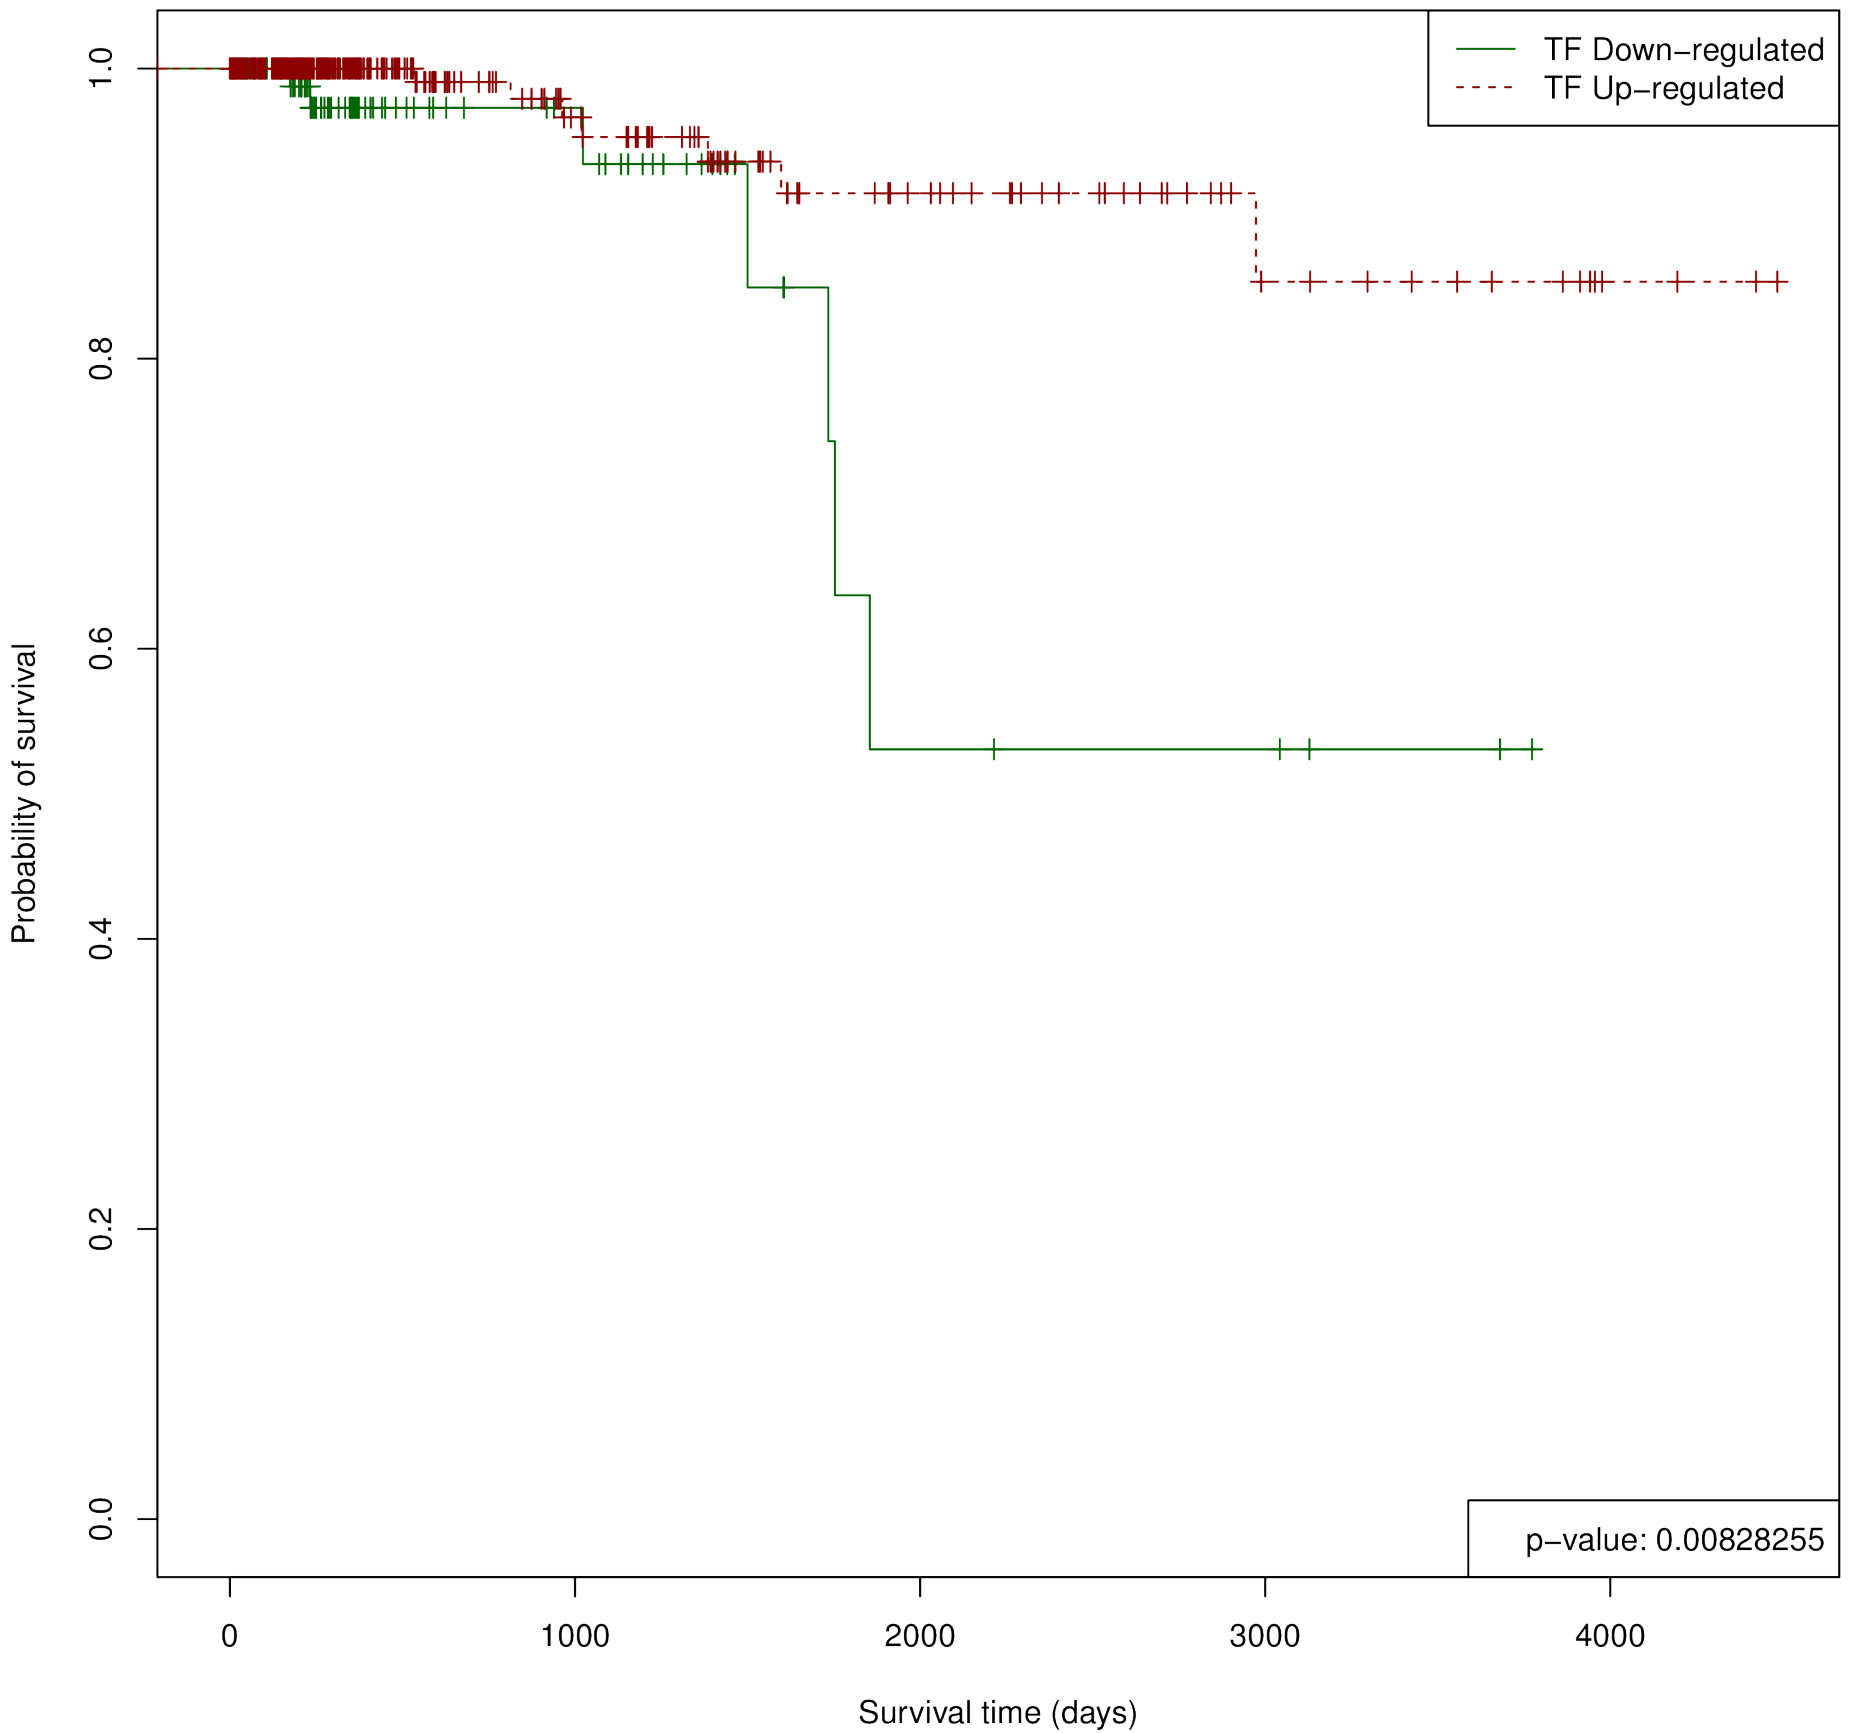

# RXR::RAR\_DR5 in HNSC

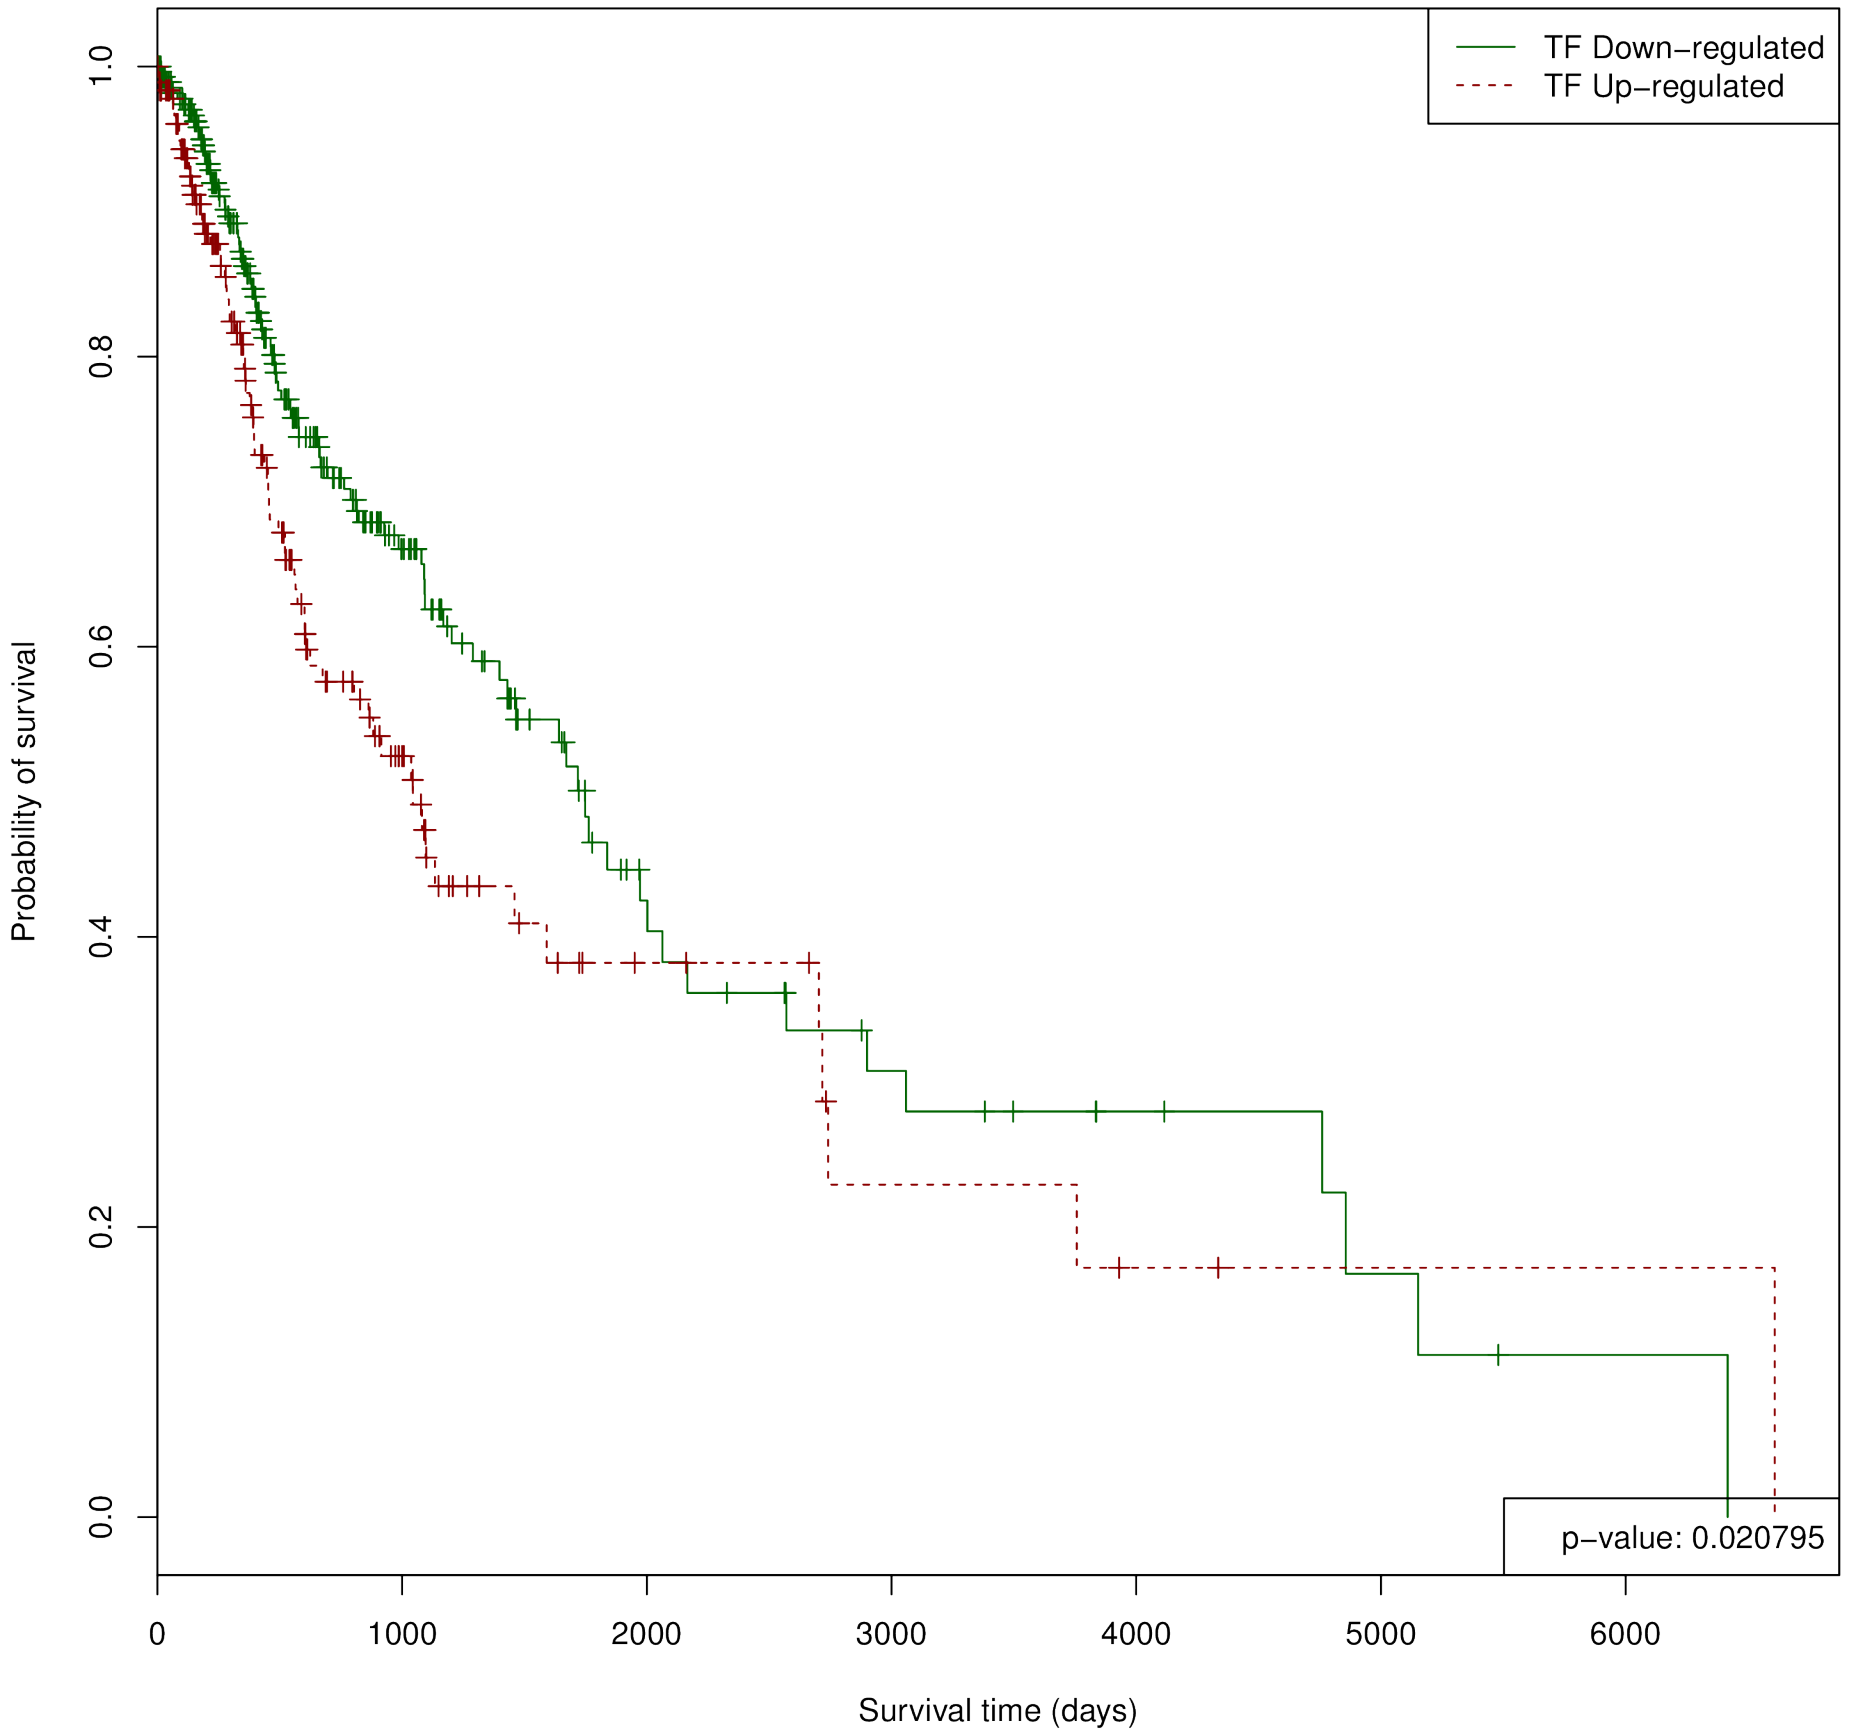

# RXR::RAR\_DR5 in KIRC

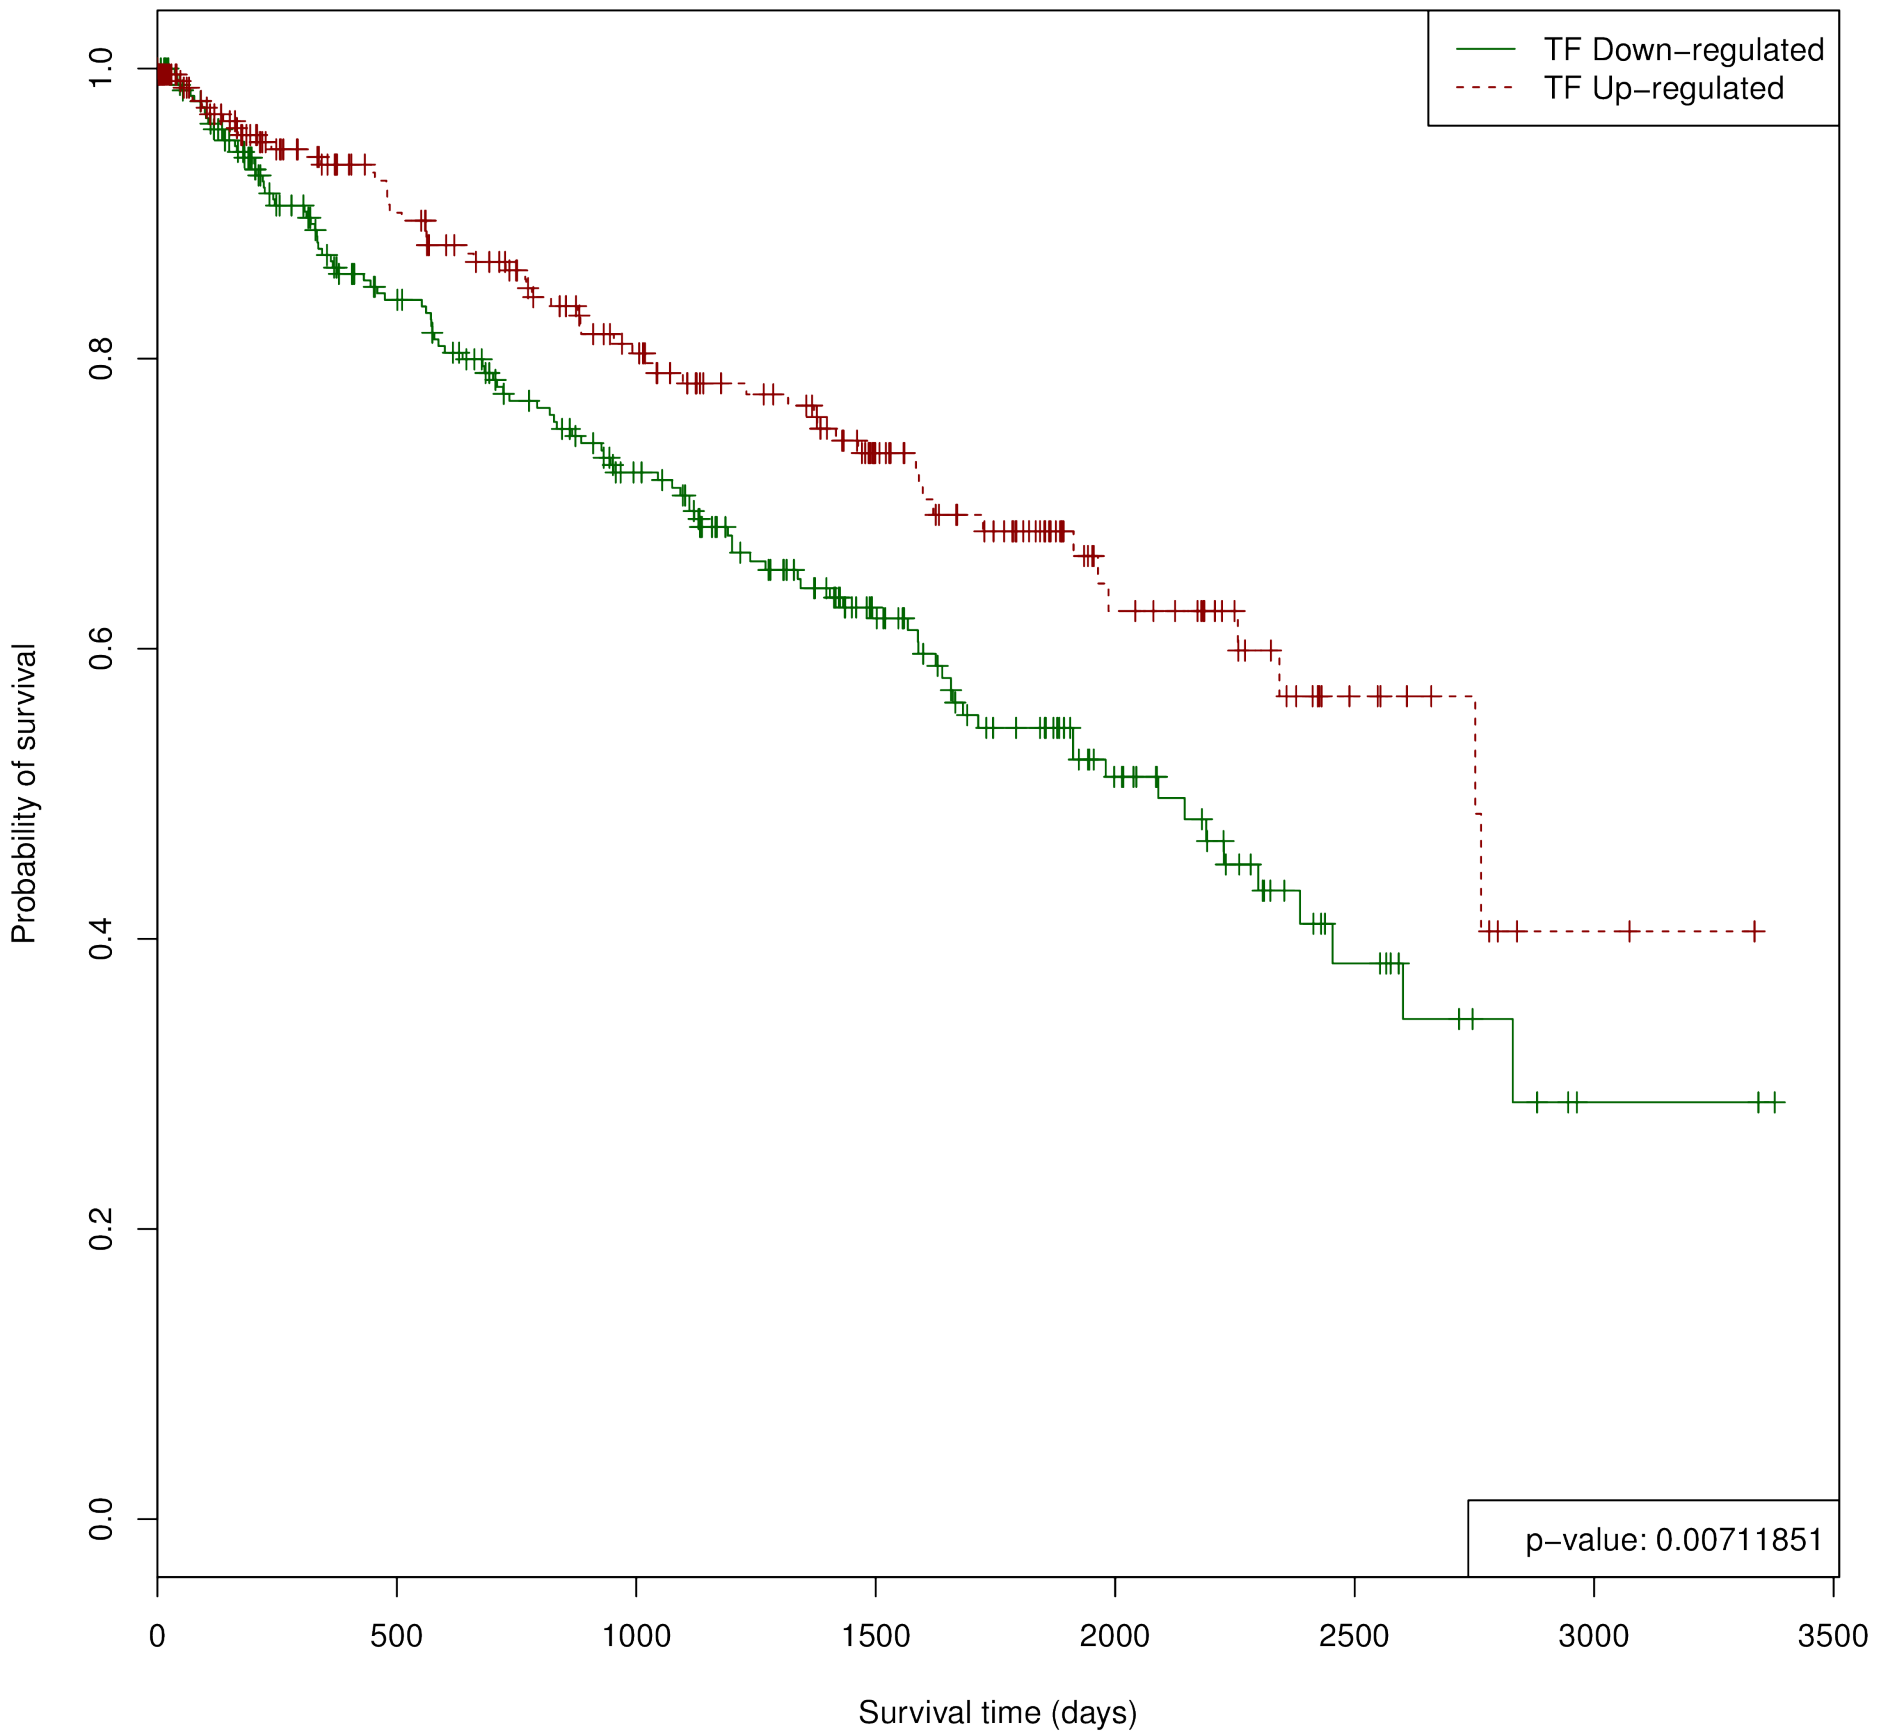

# SP1 in HNSC

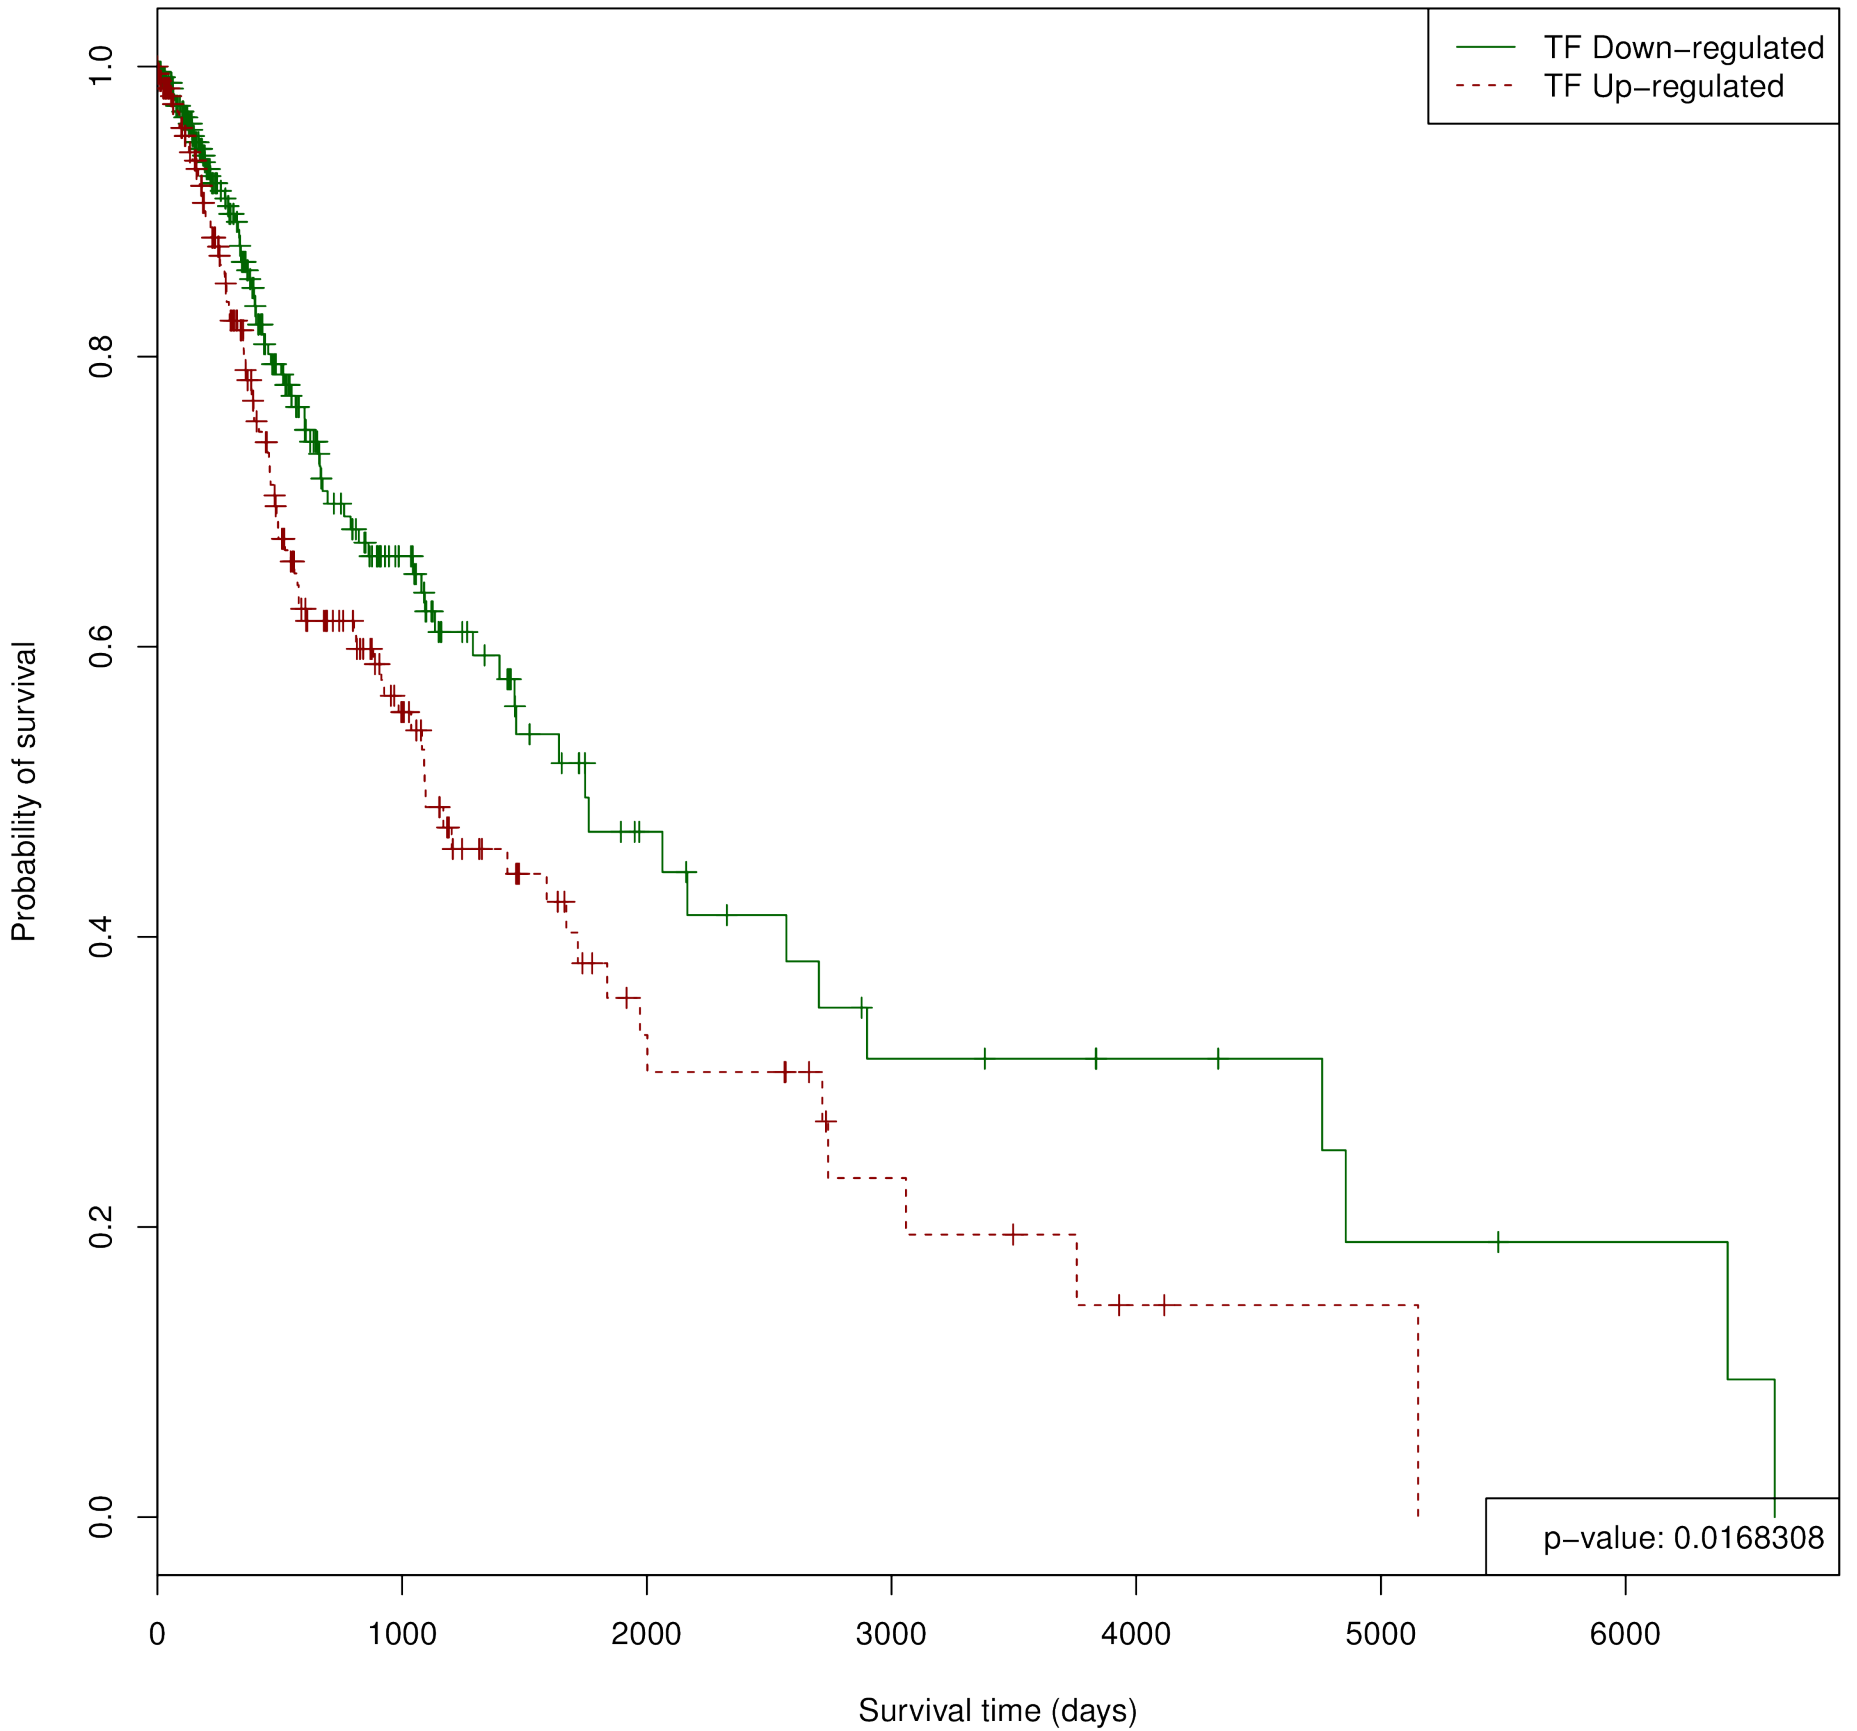

# SP1 in KIRC

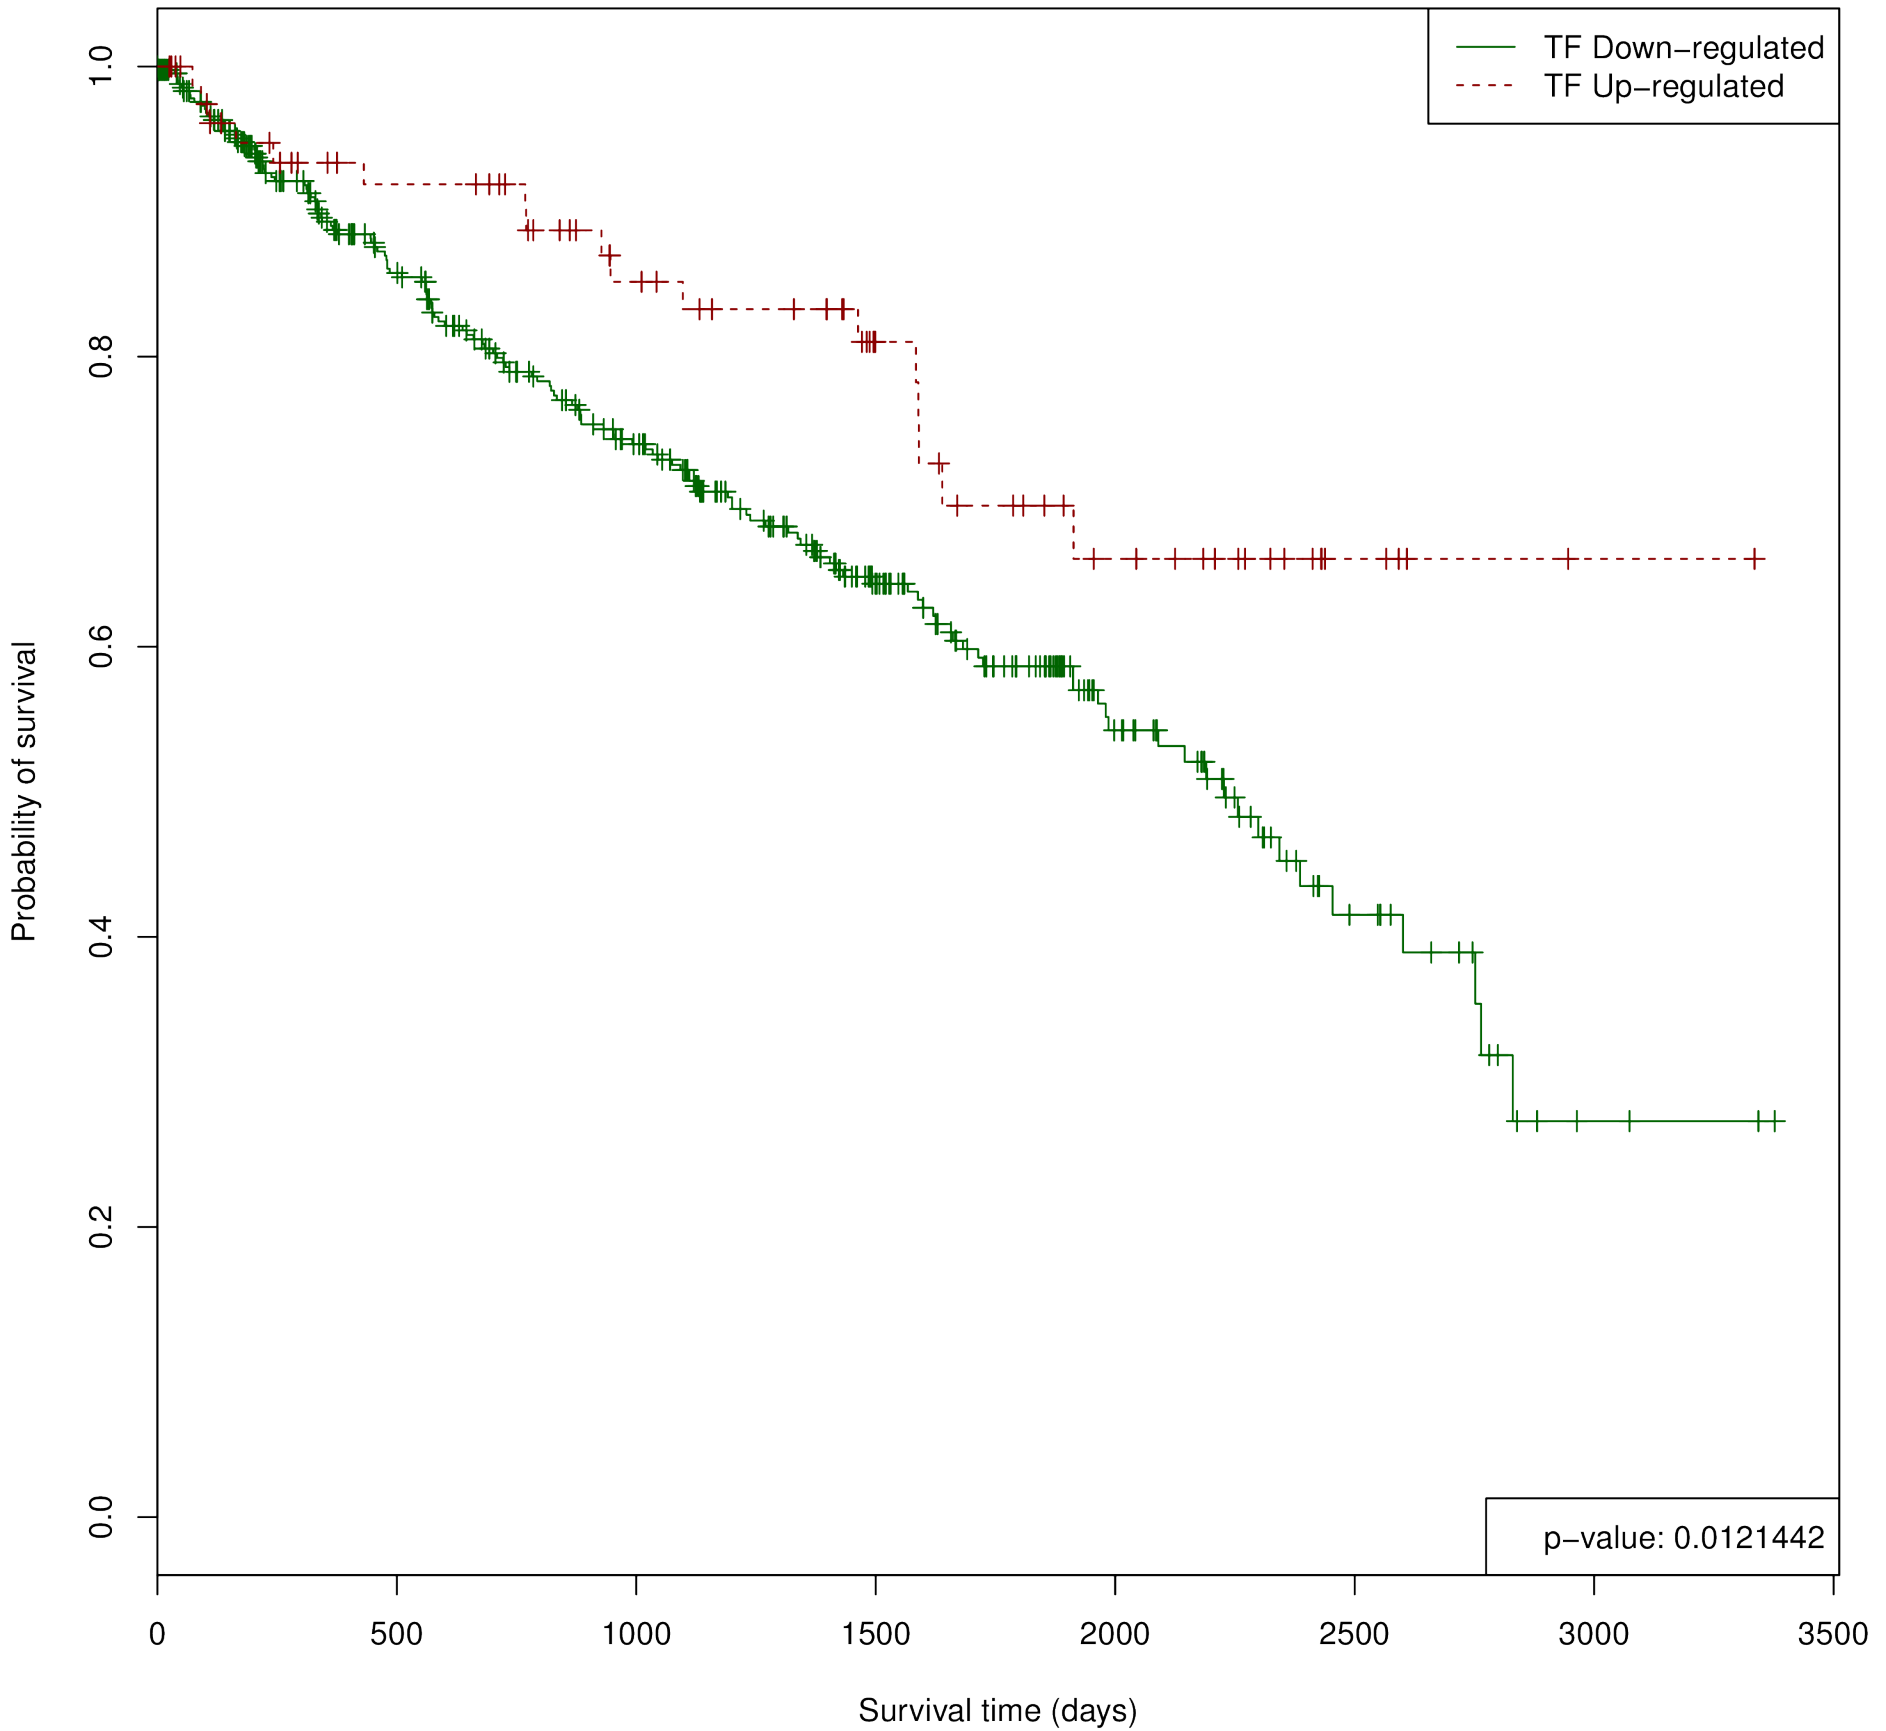

# SP2 in HNSC

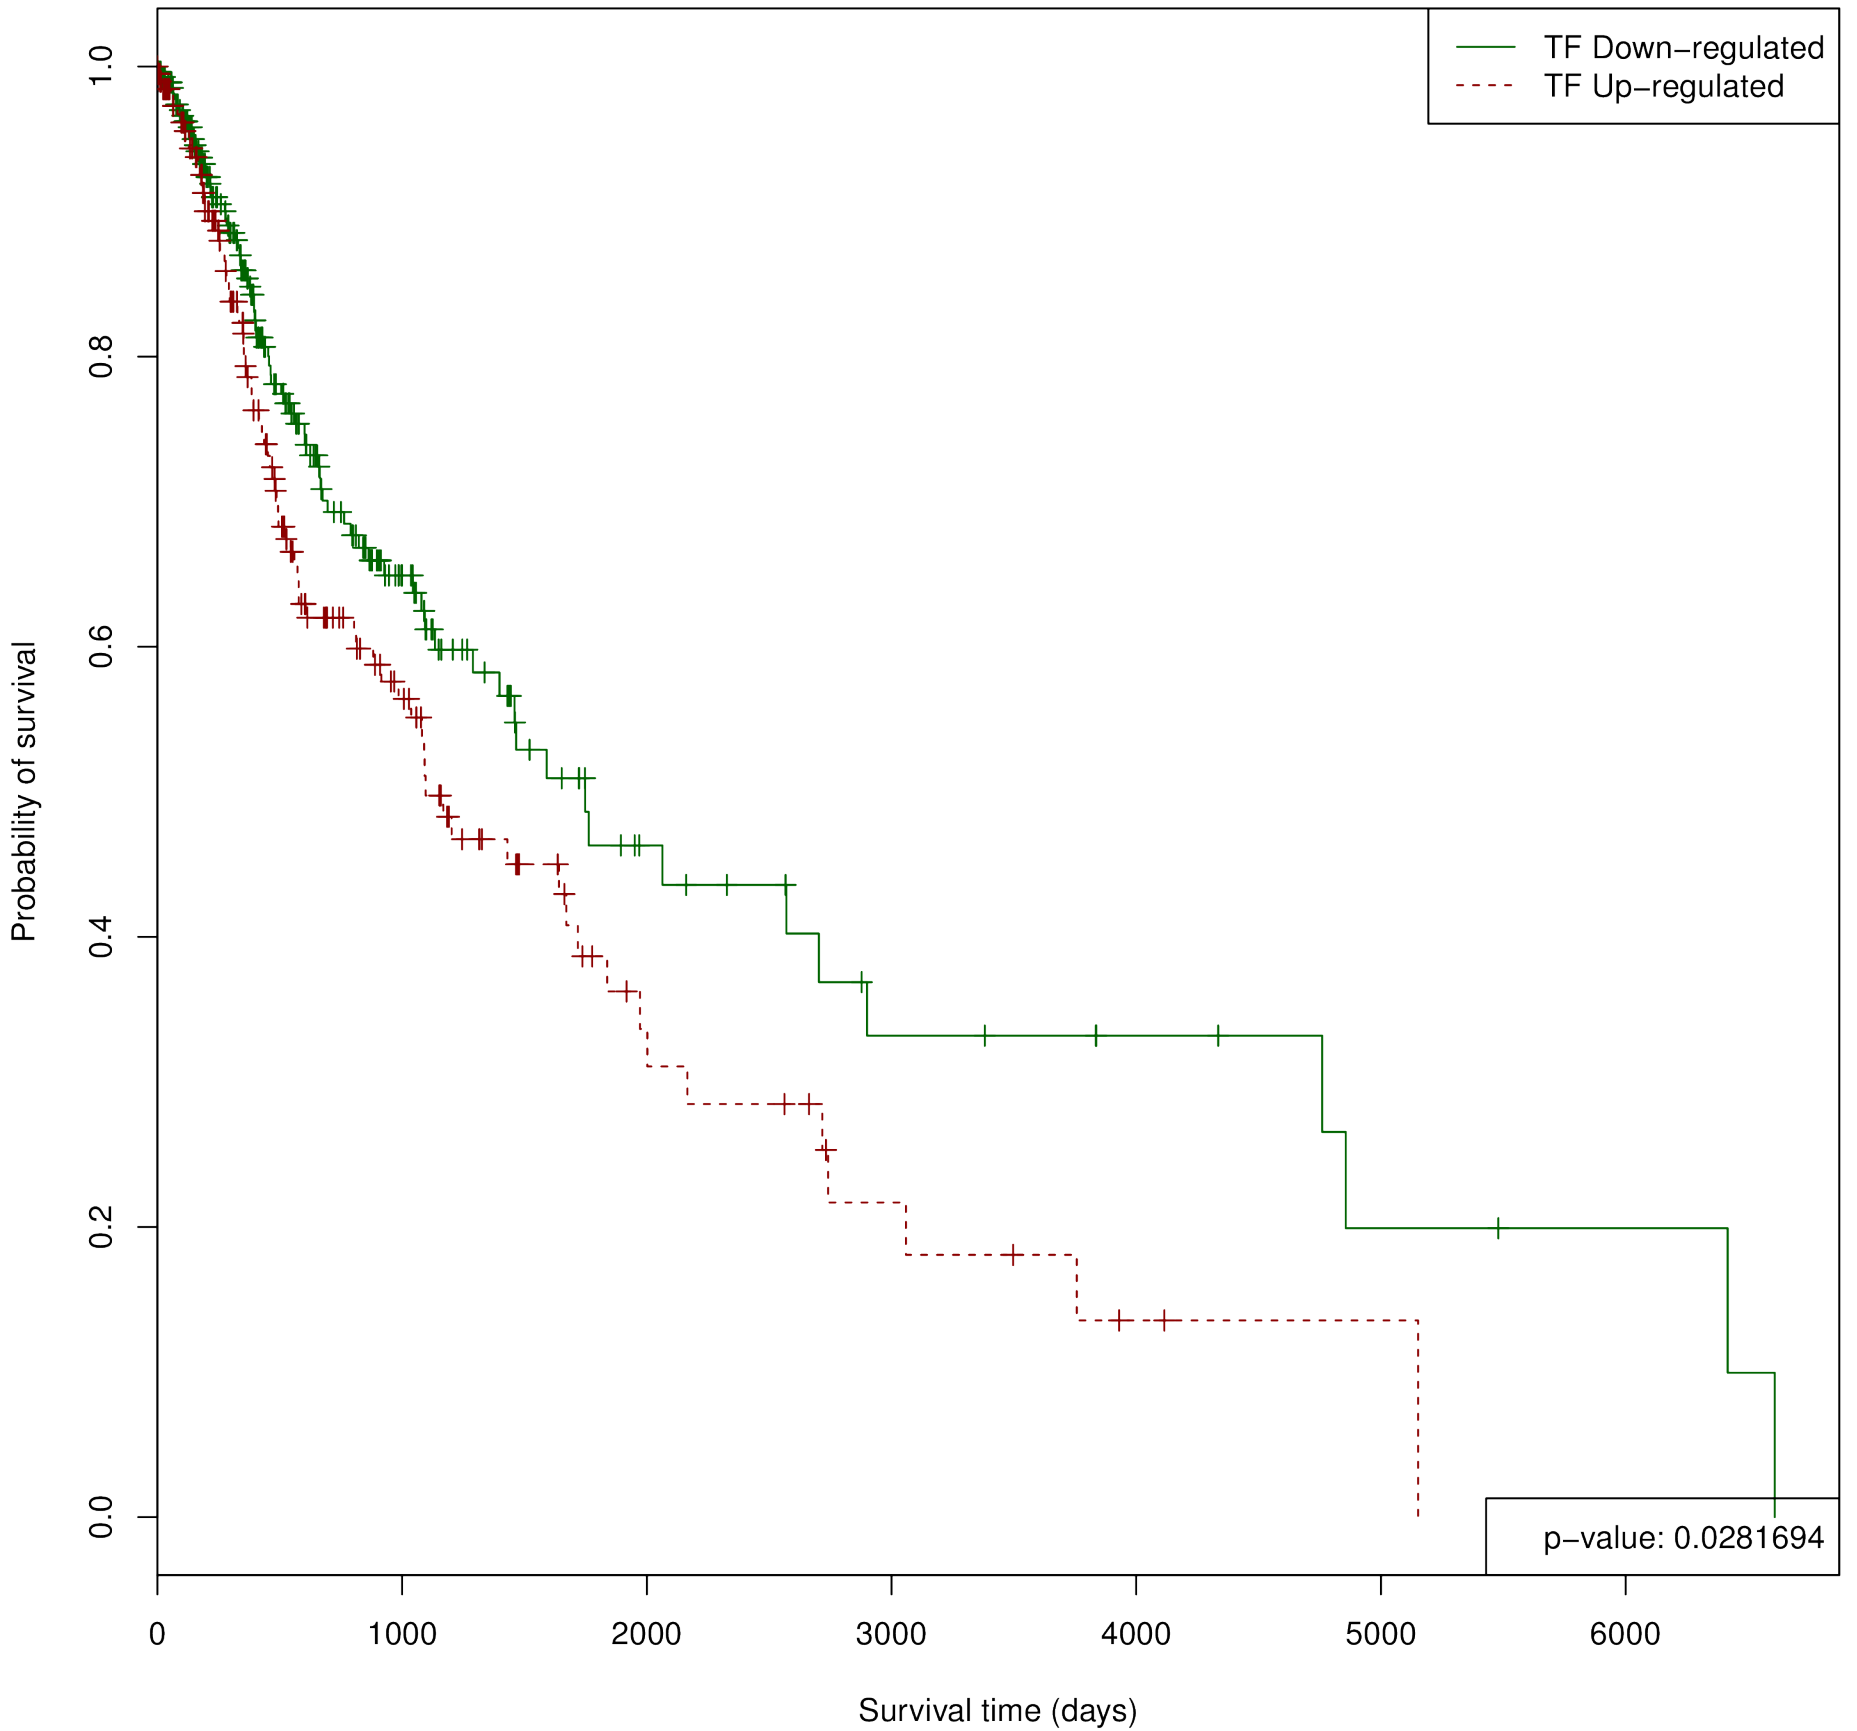

# SP2 in KIRC

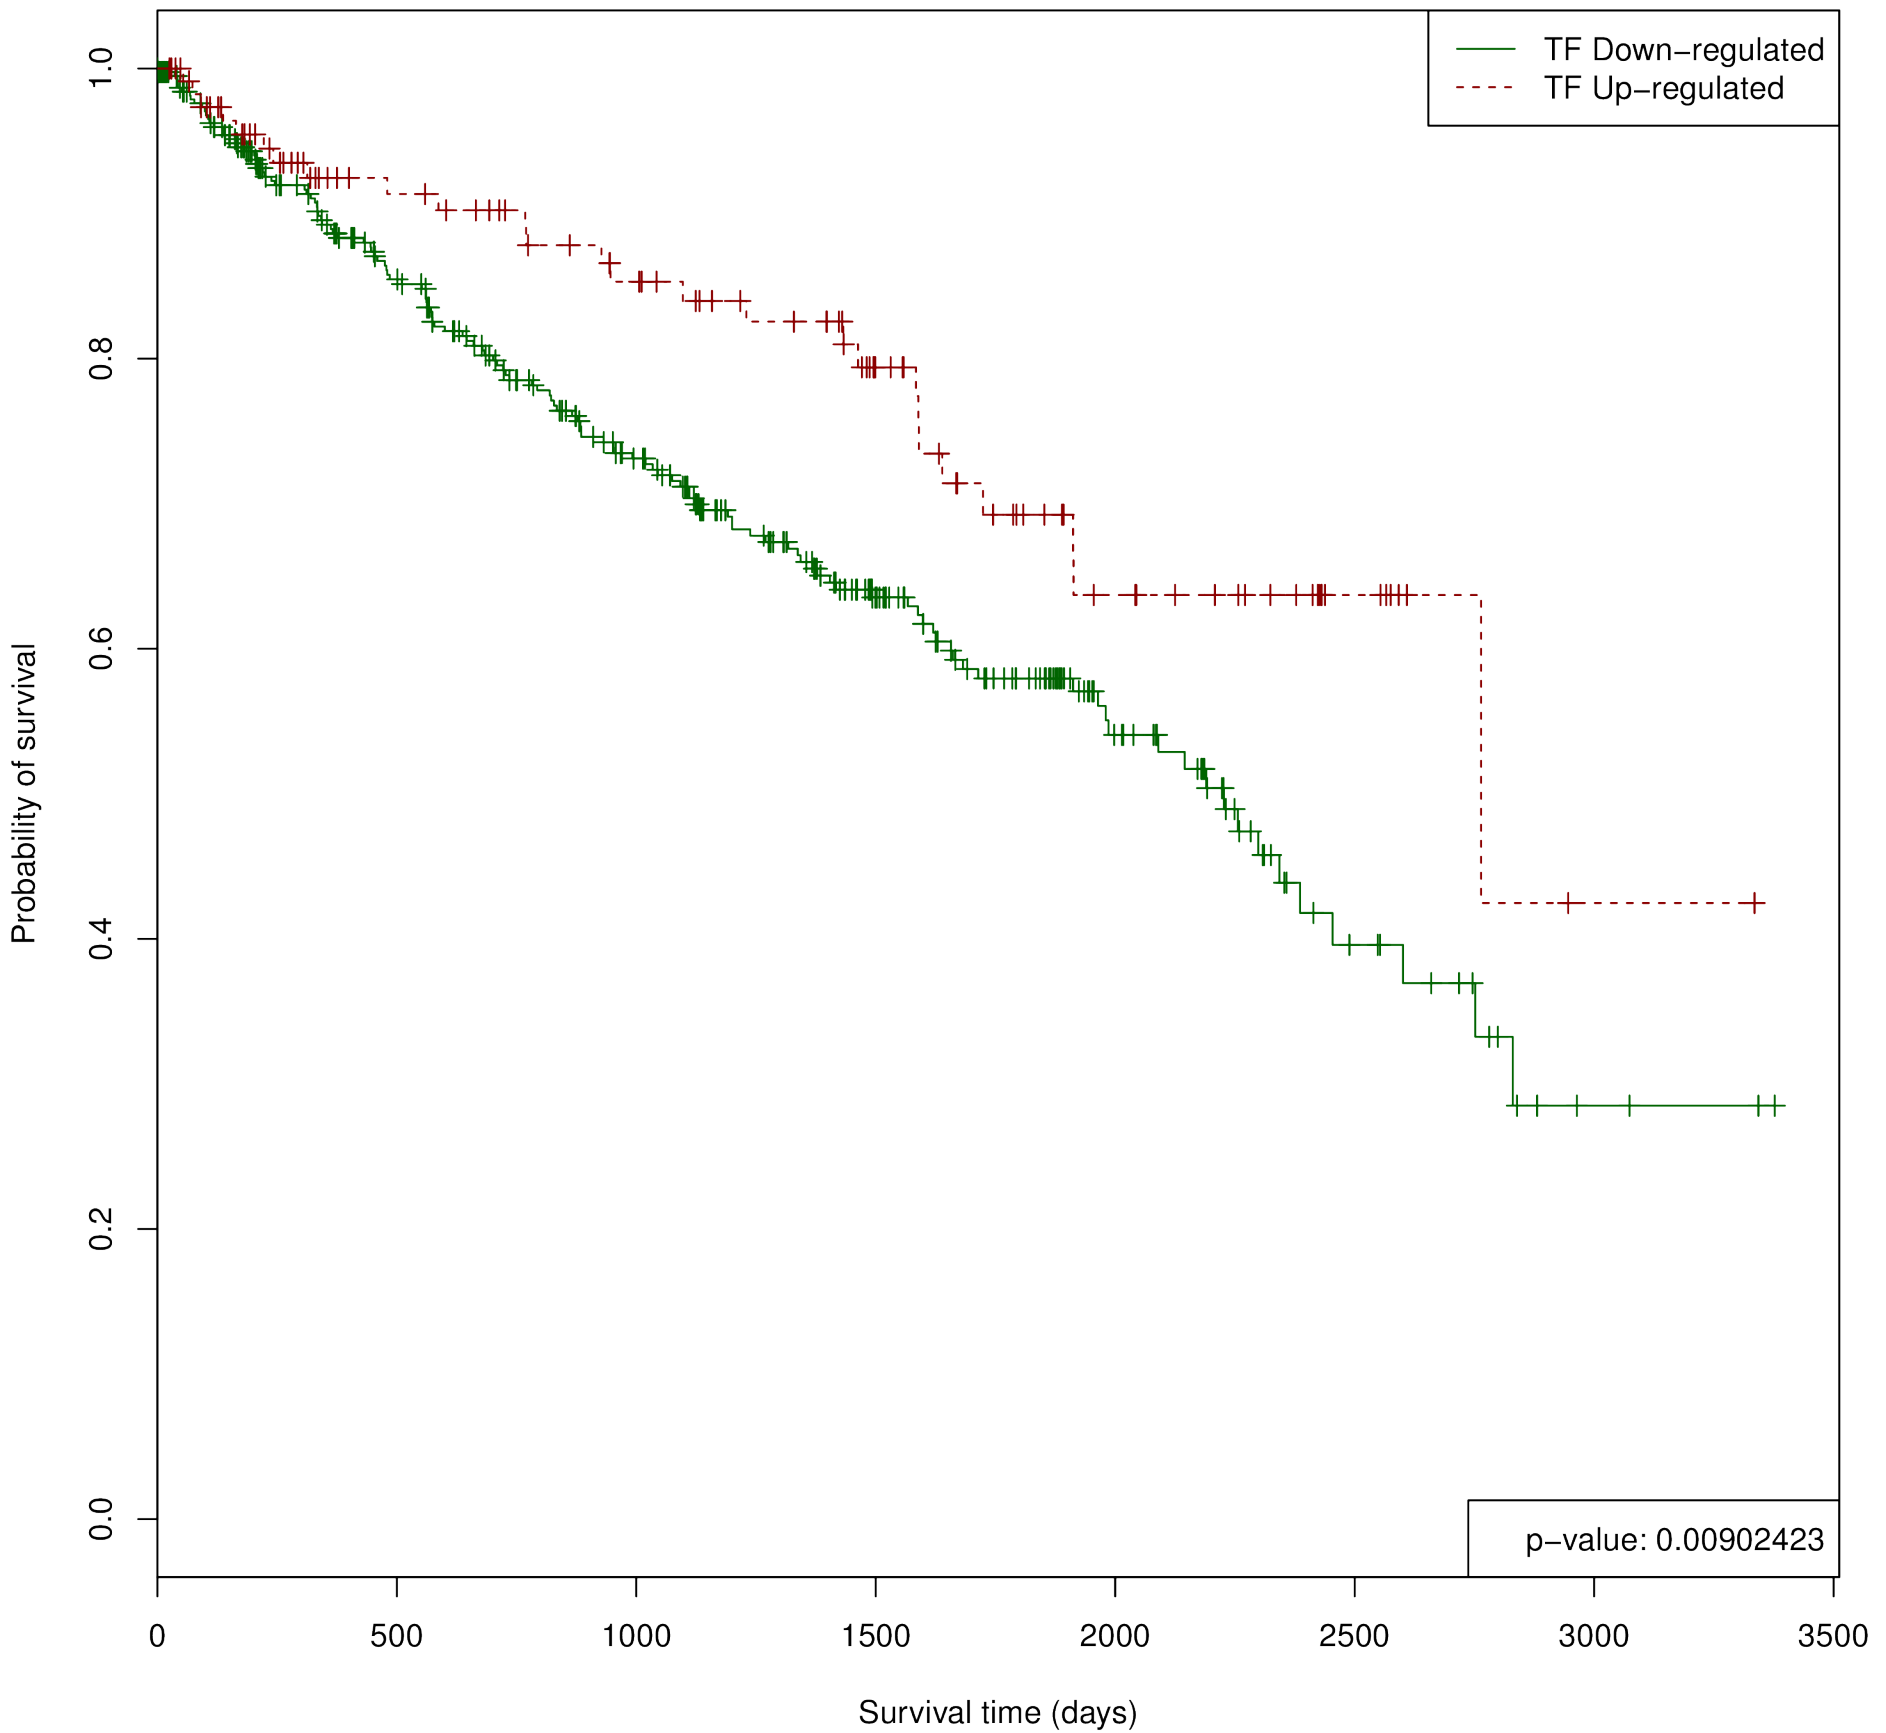

# SPI1 in KIRC

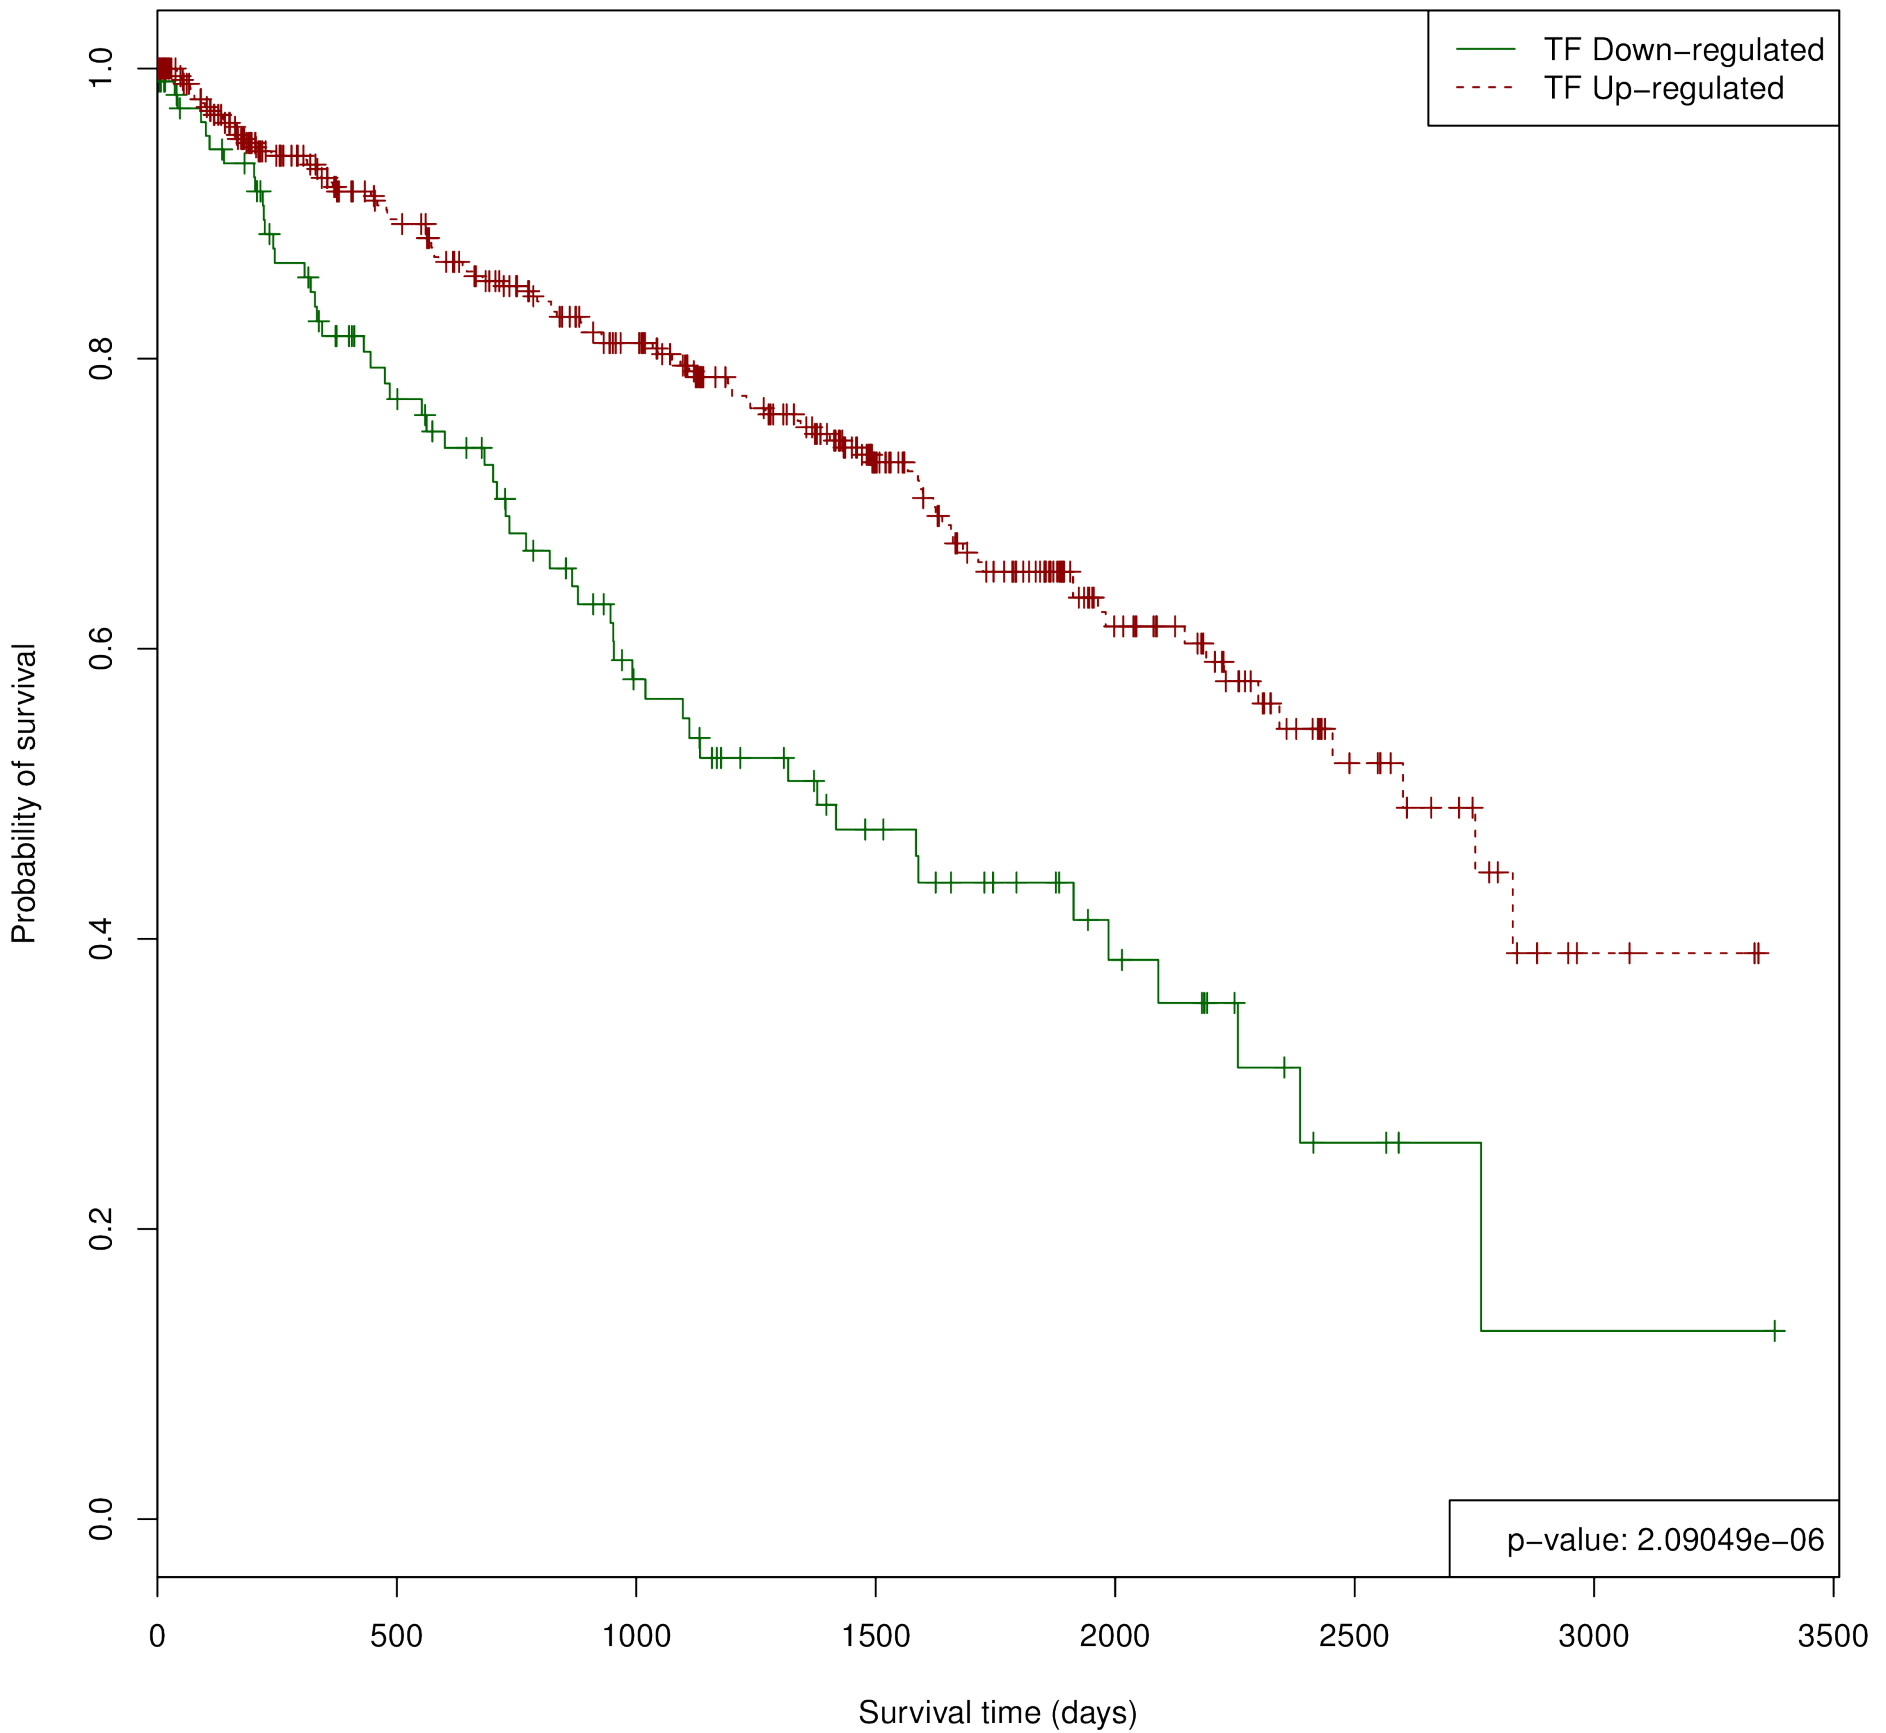



# SRF in BLCA

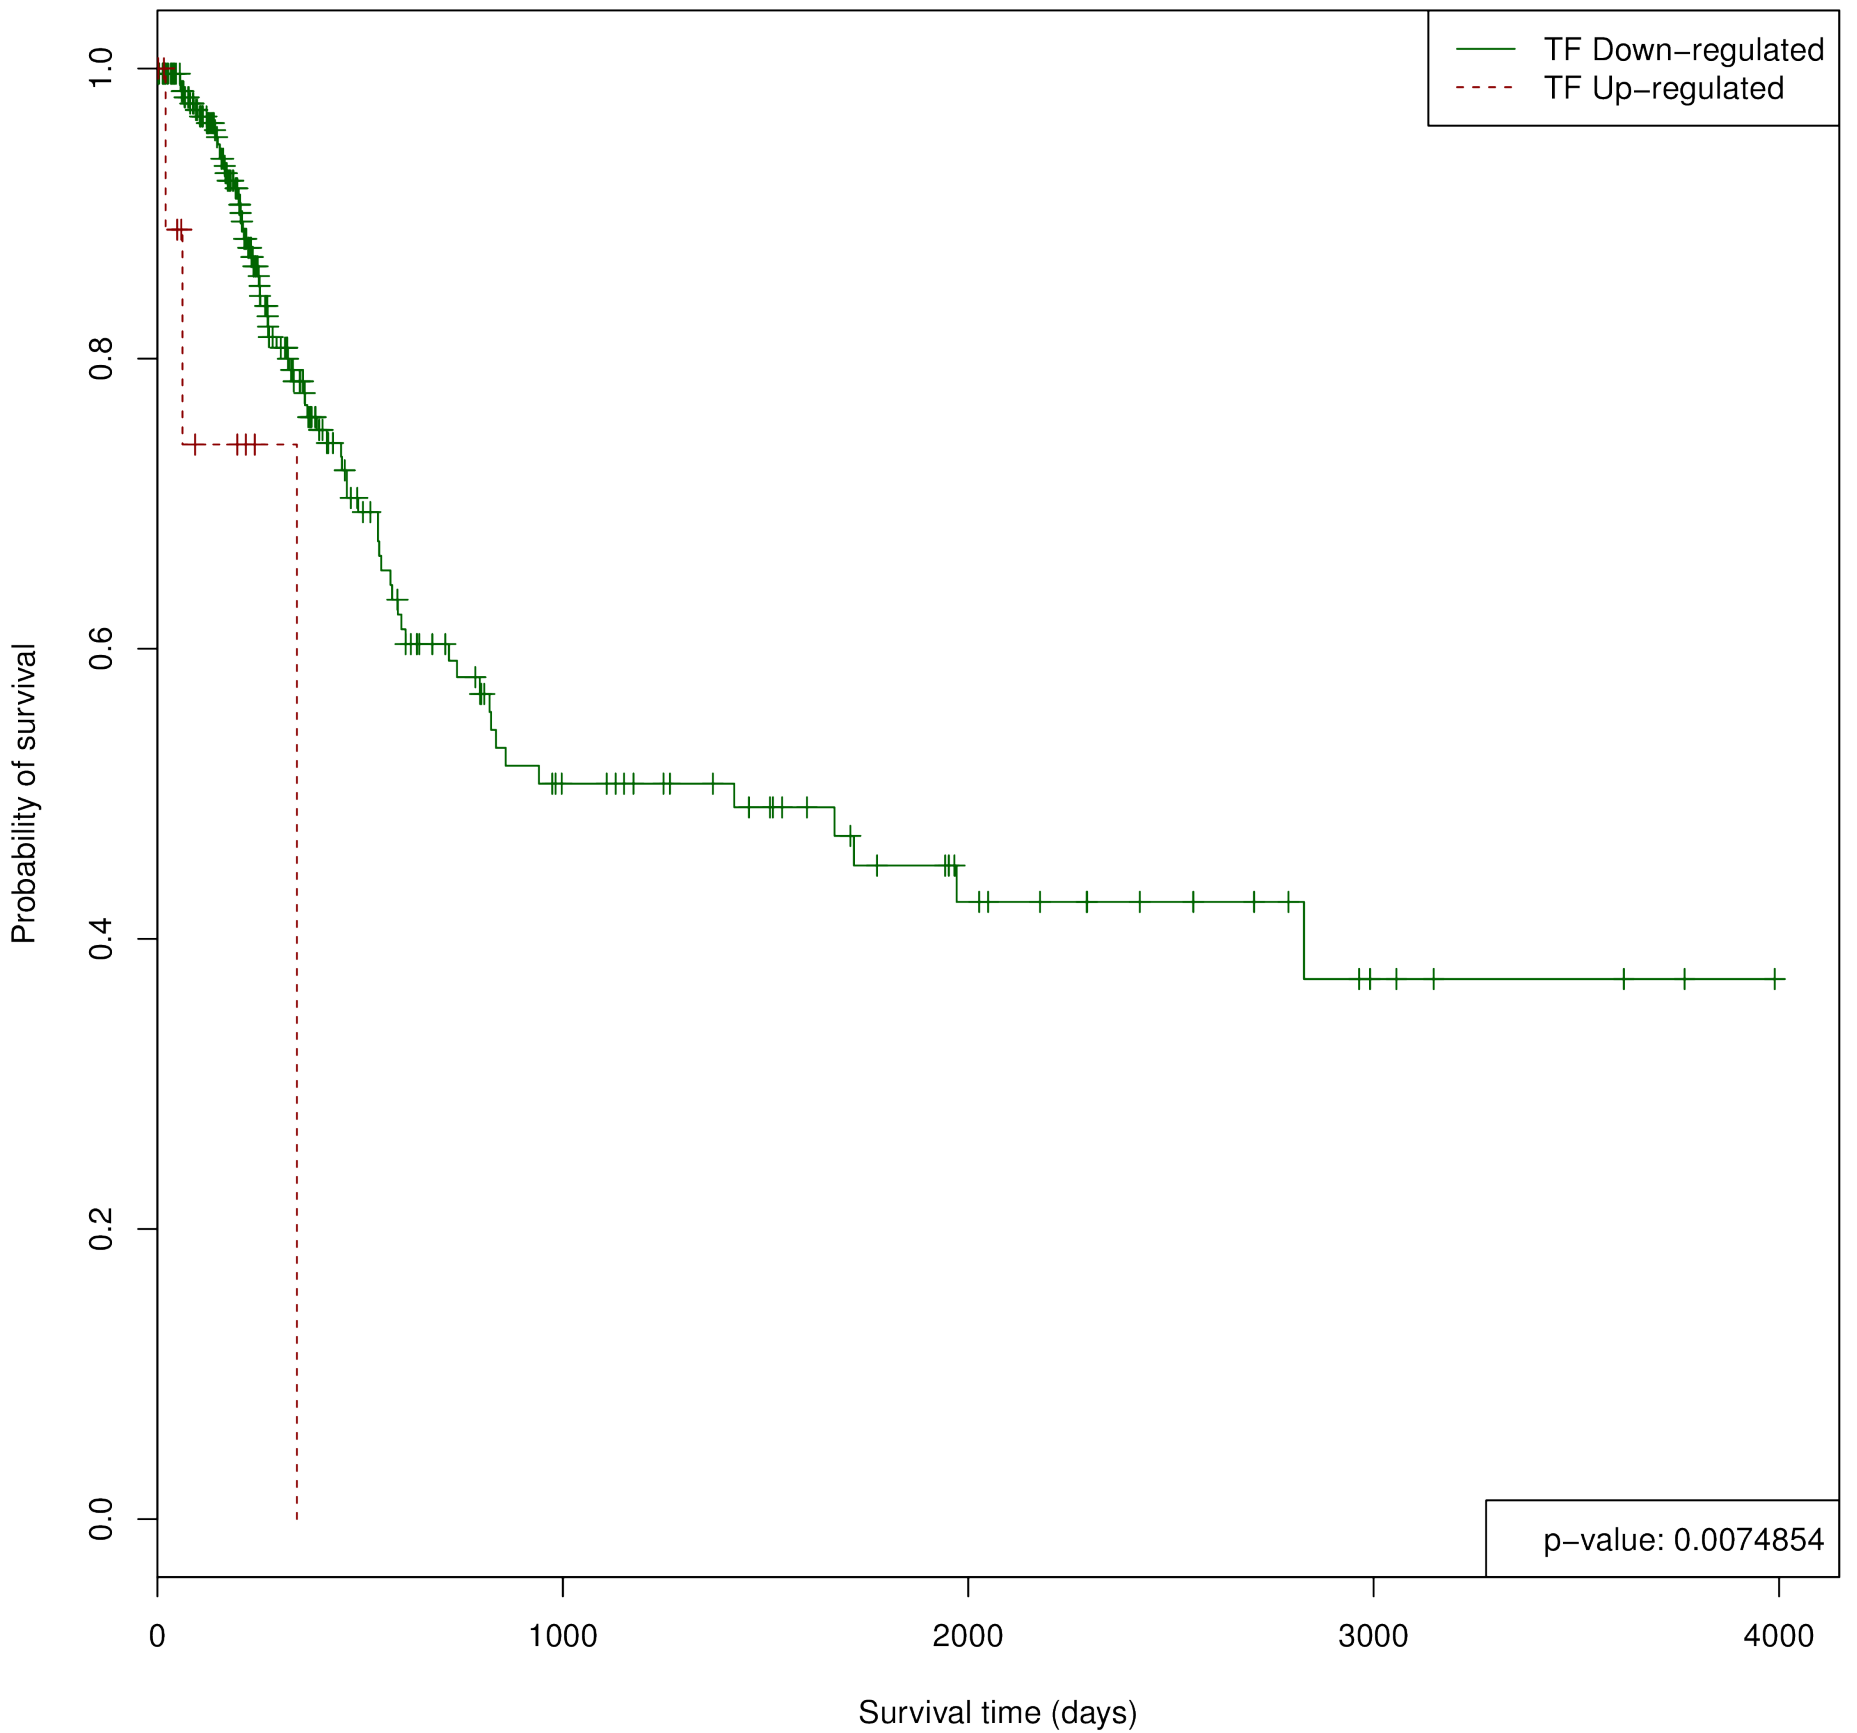

# SRF in KIRC

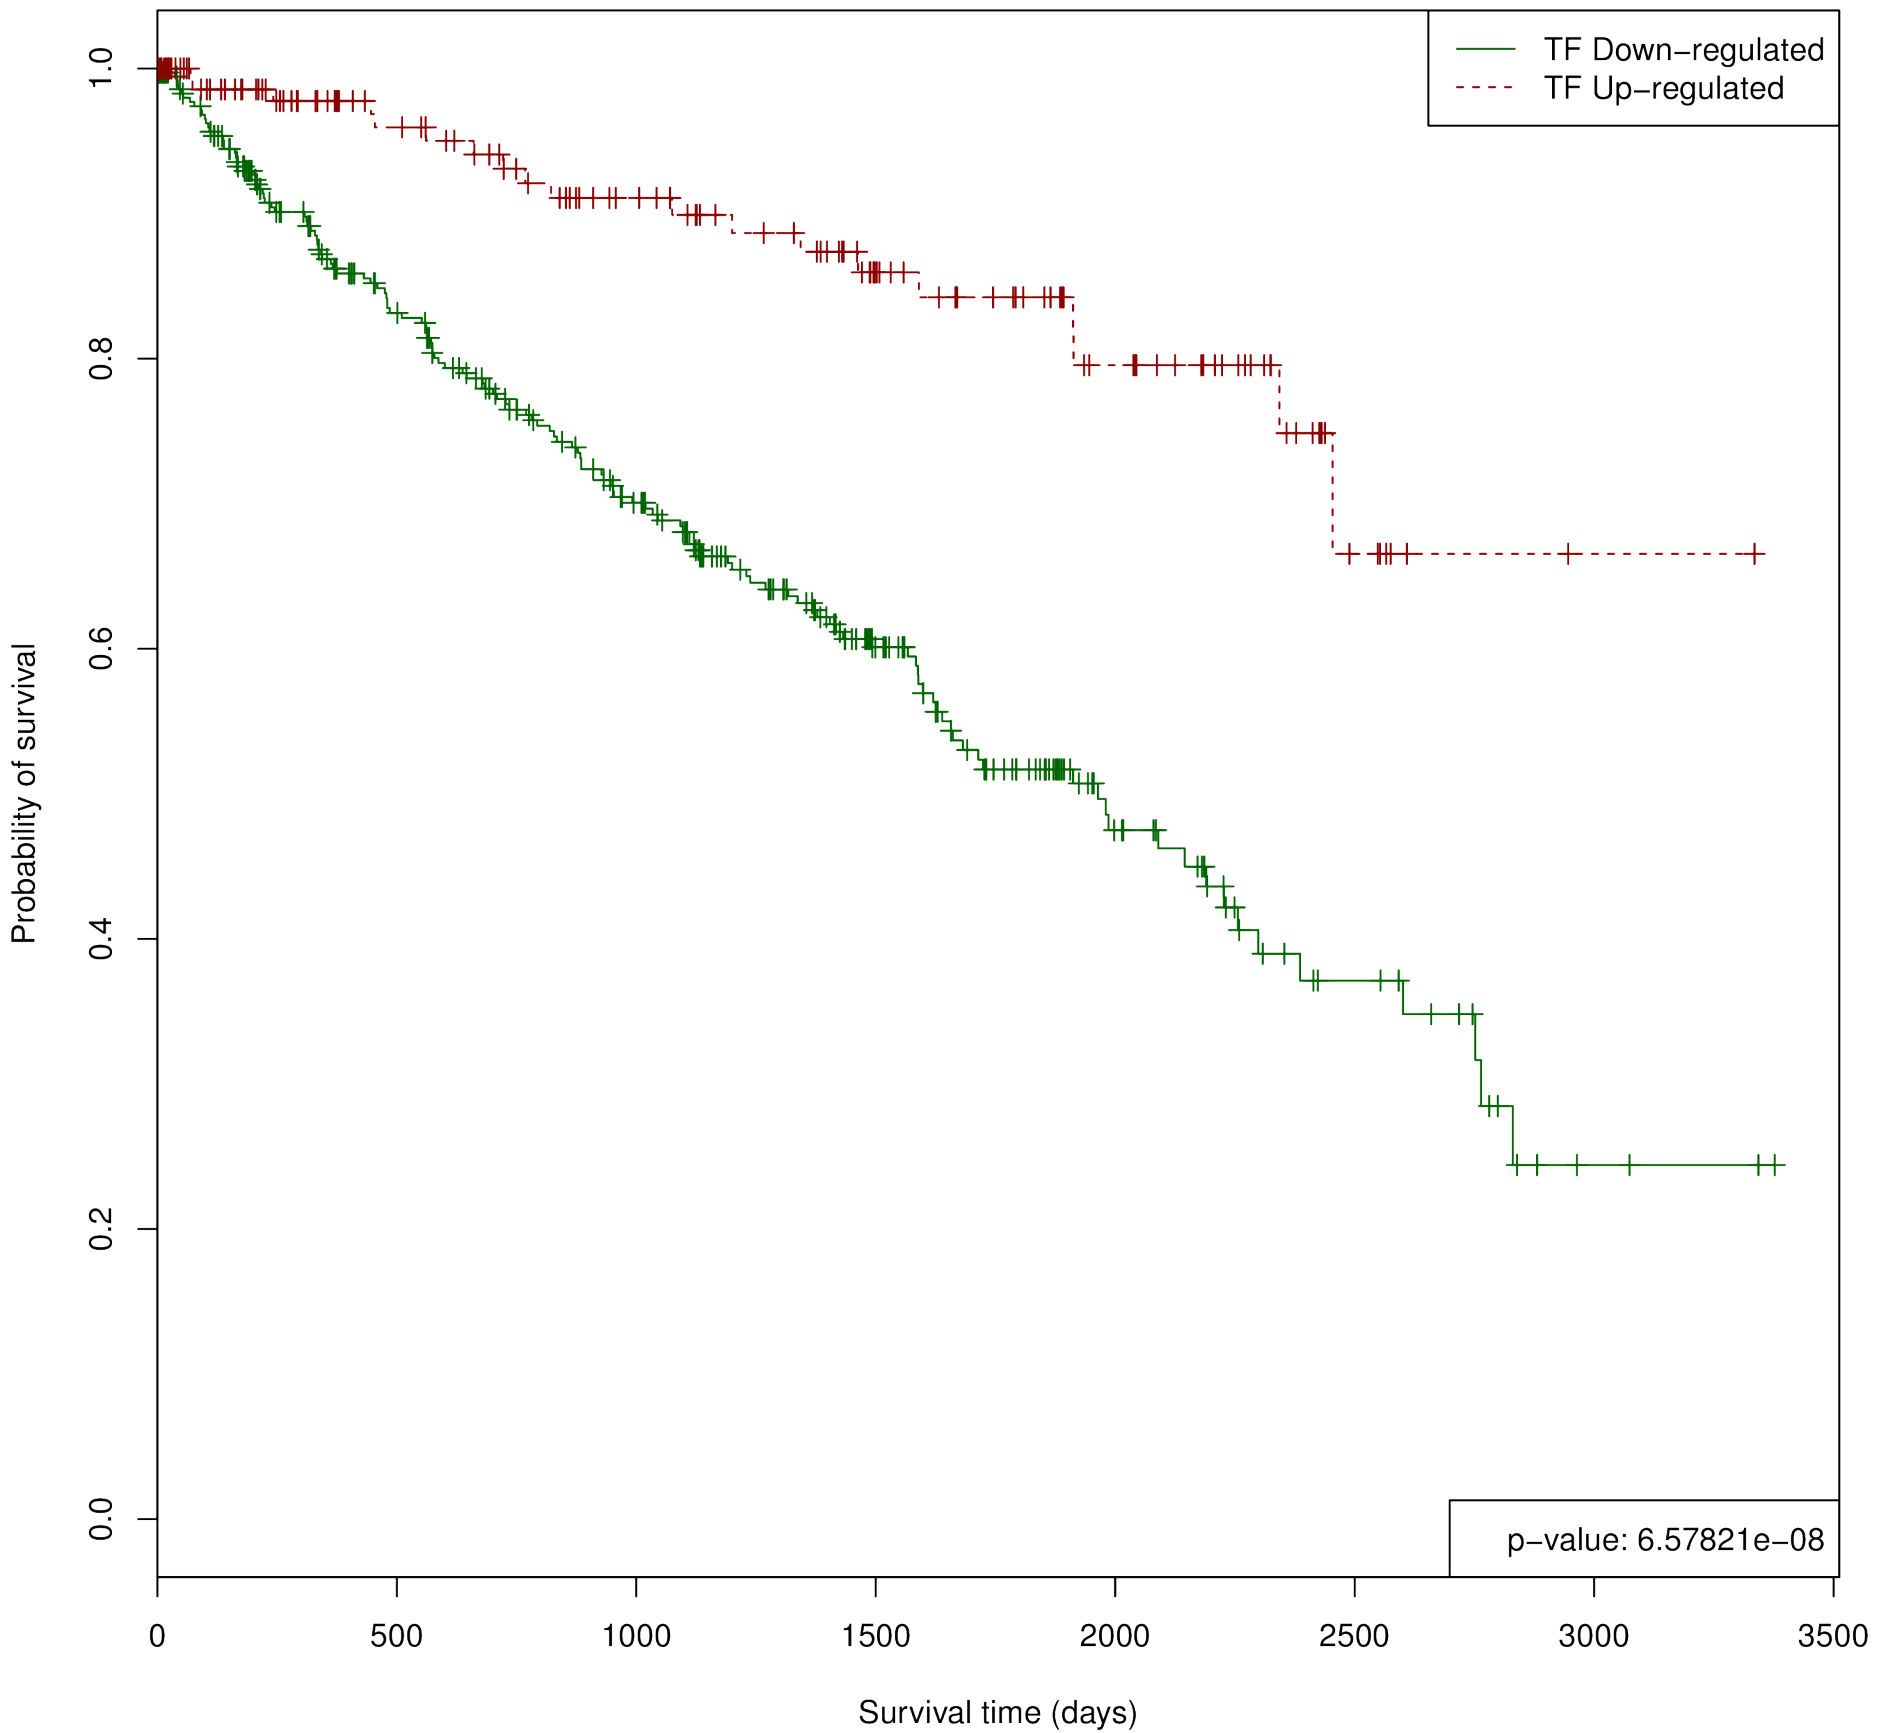

# TAL1::GATA1 in BRCA

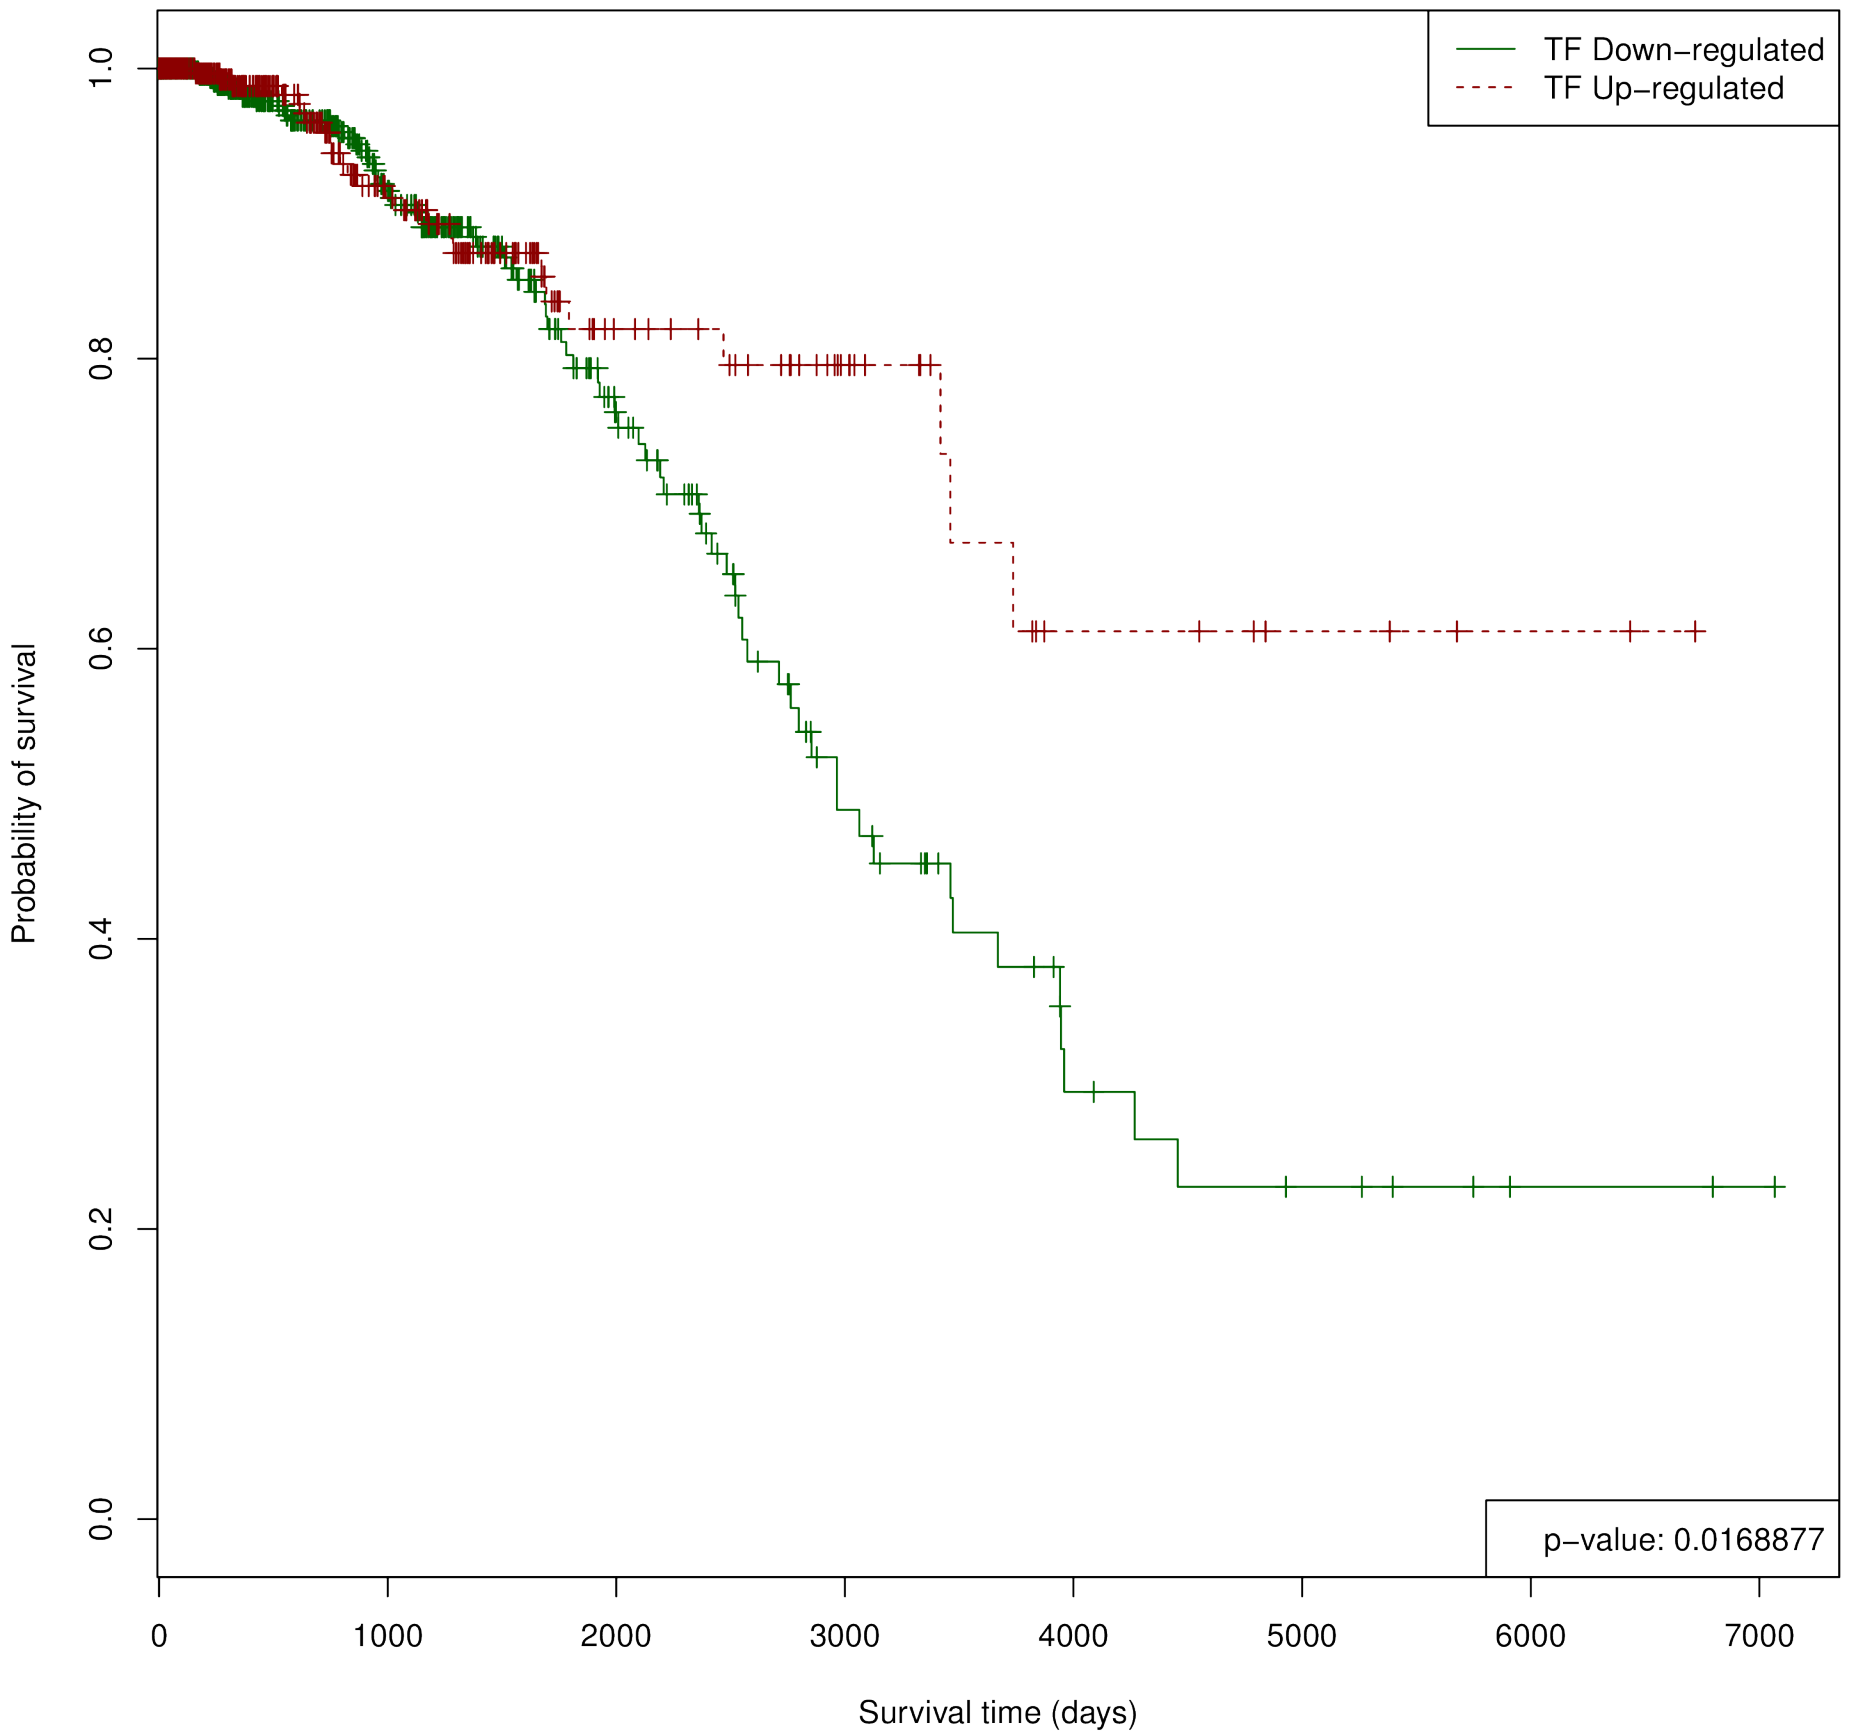

# TAL1::GATA1 in LUAD

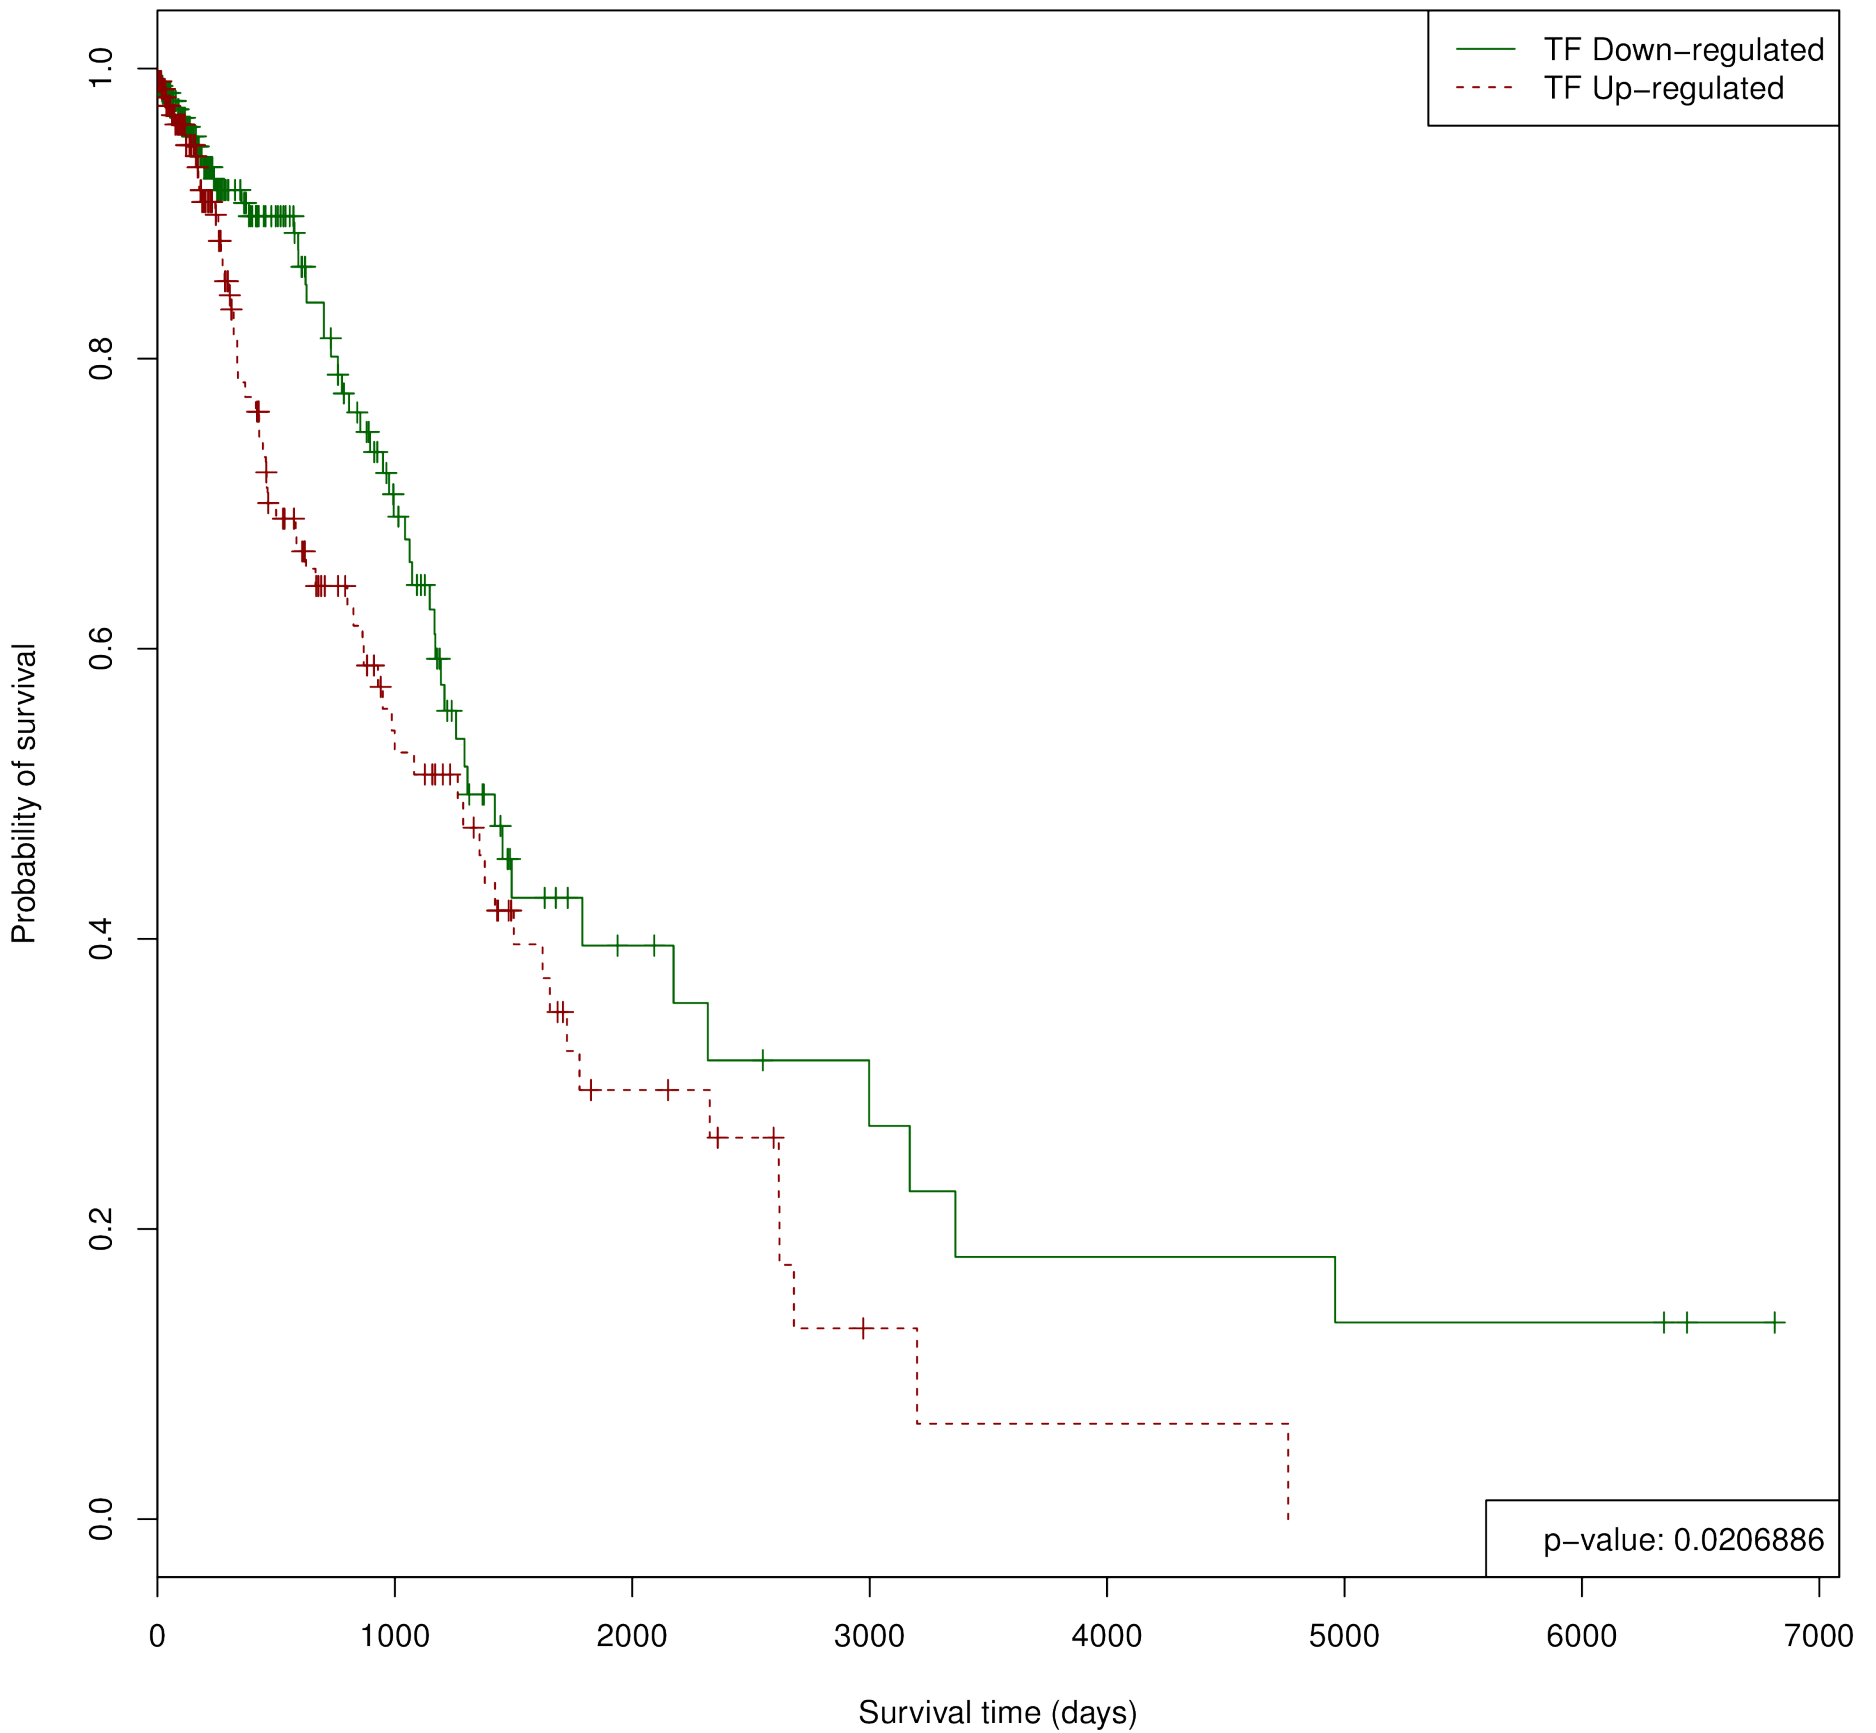

# TCF12 in KIRC

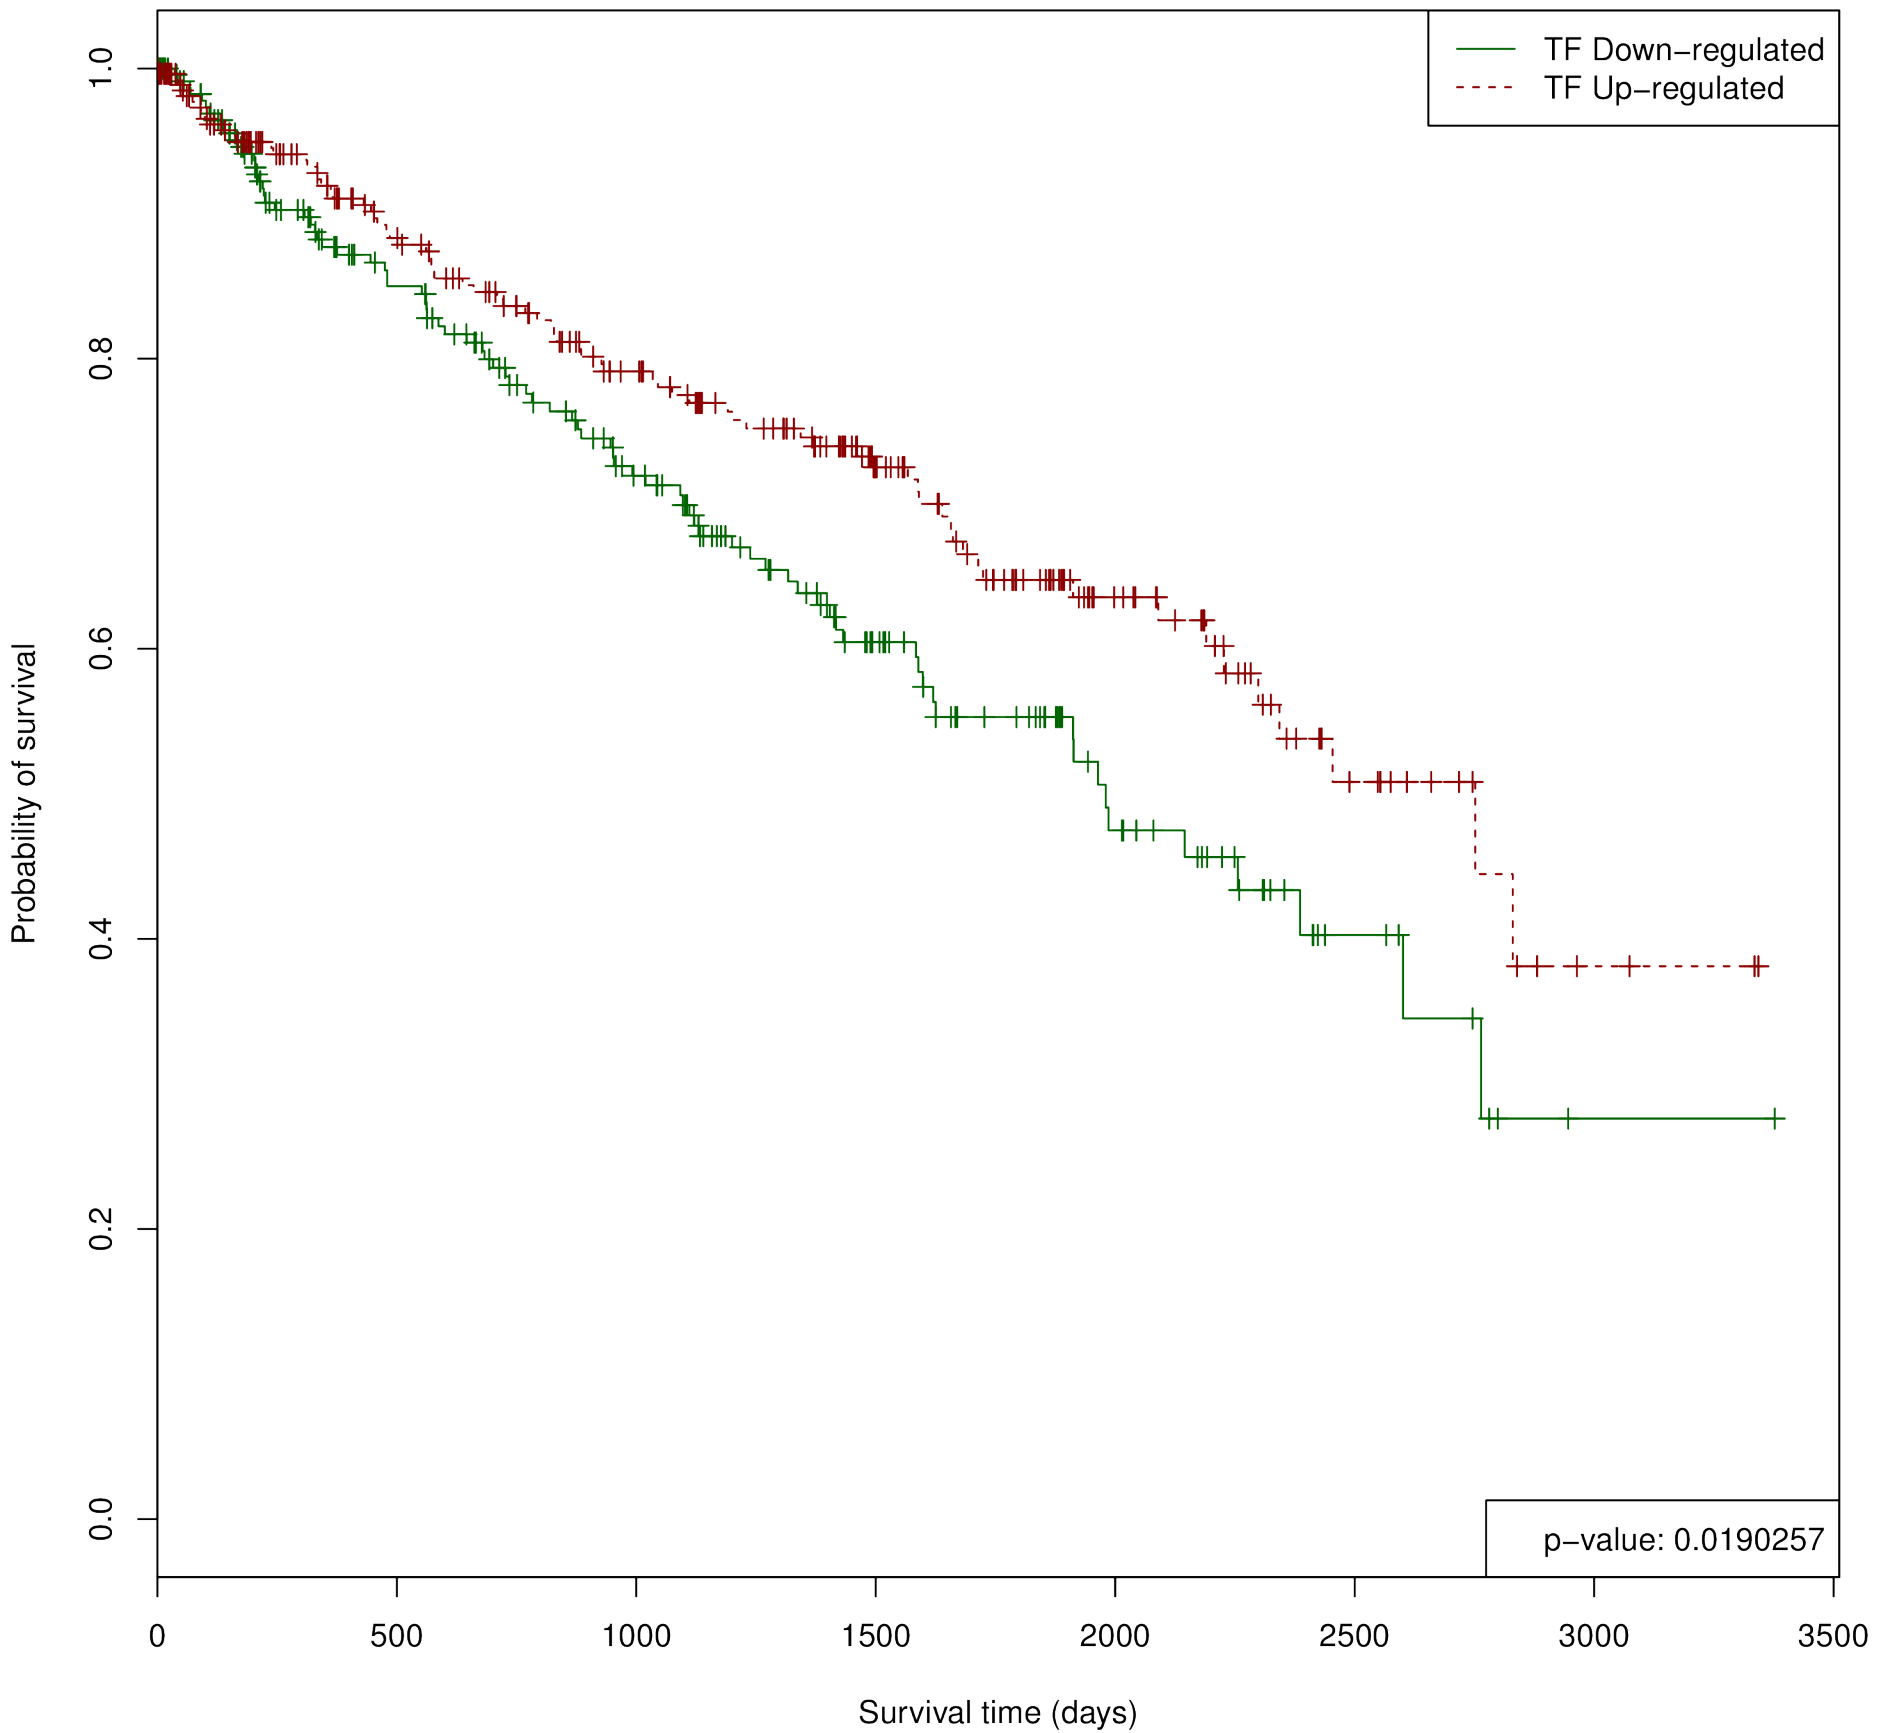

# TCF12 in LUAD

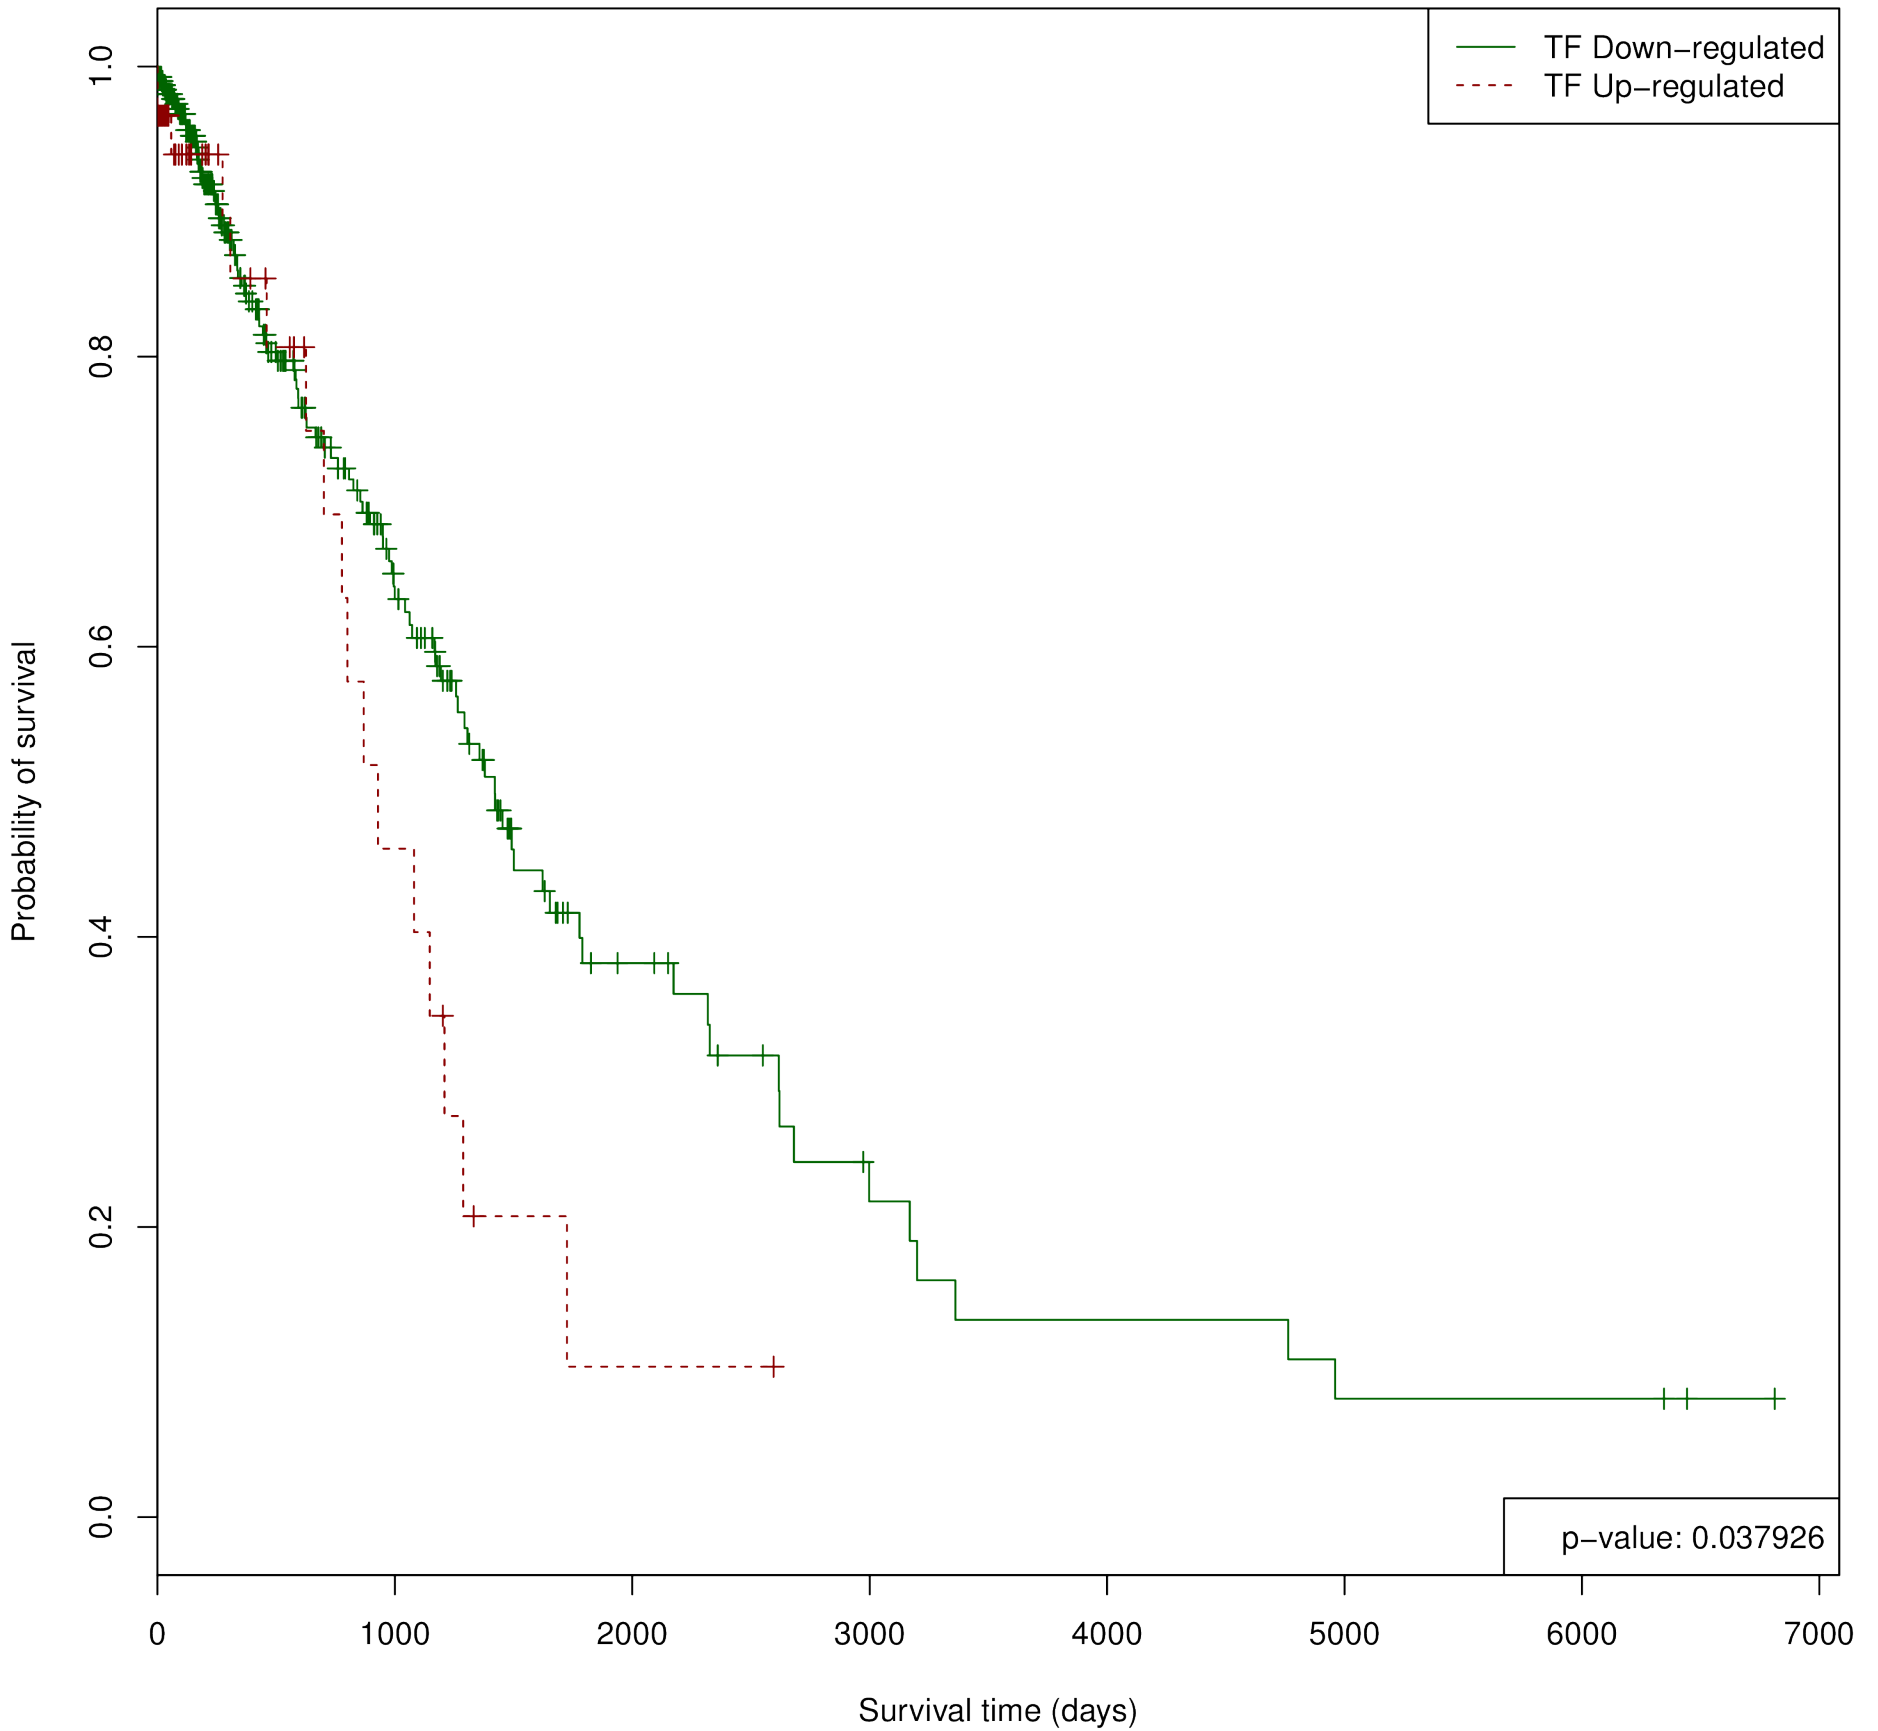

# USF1 in KIRC

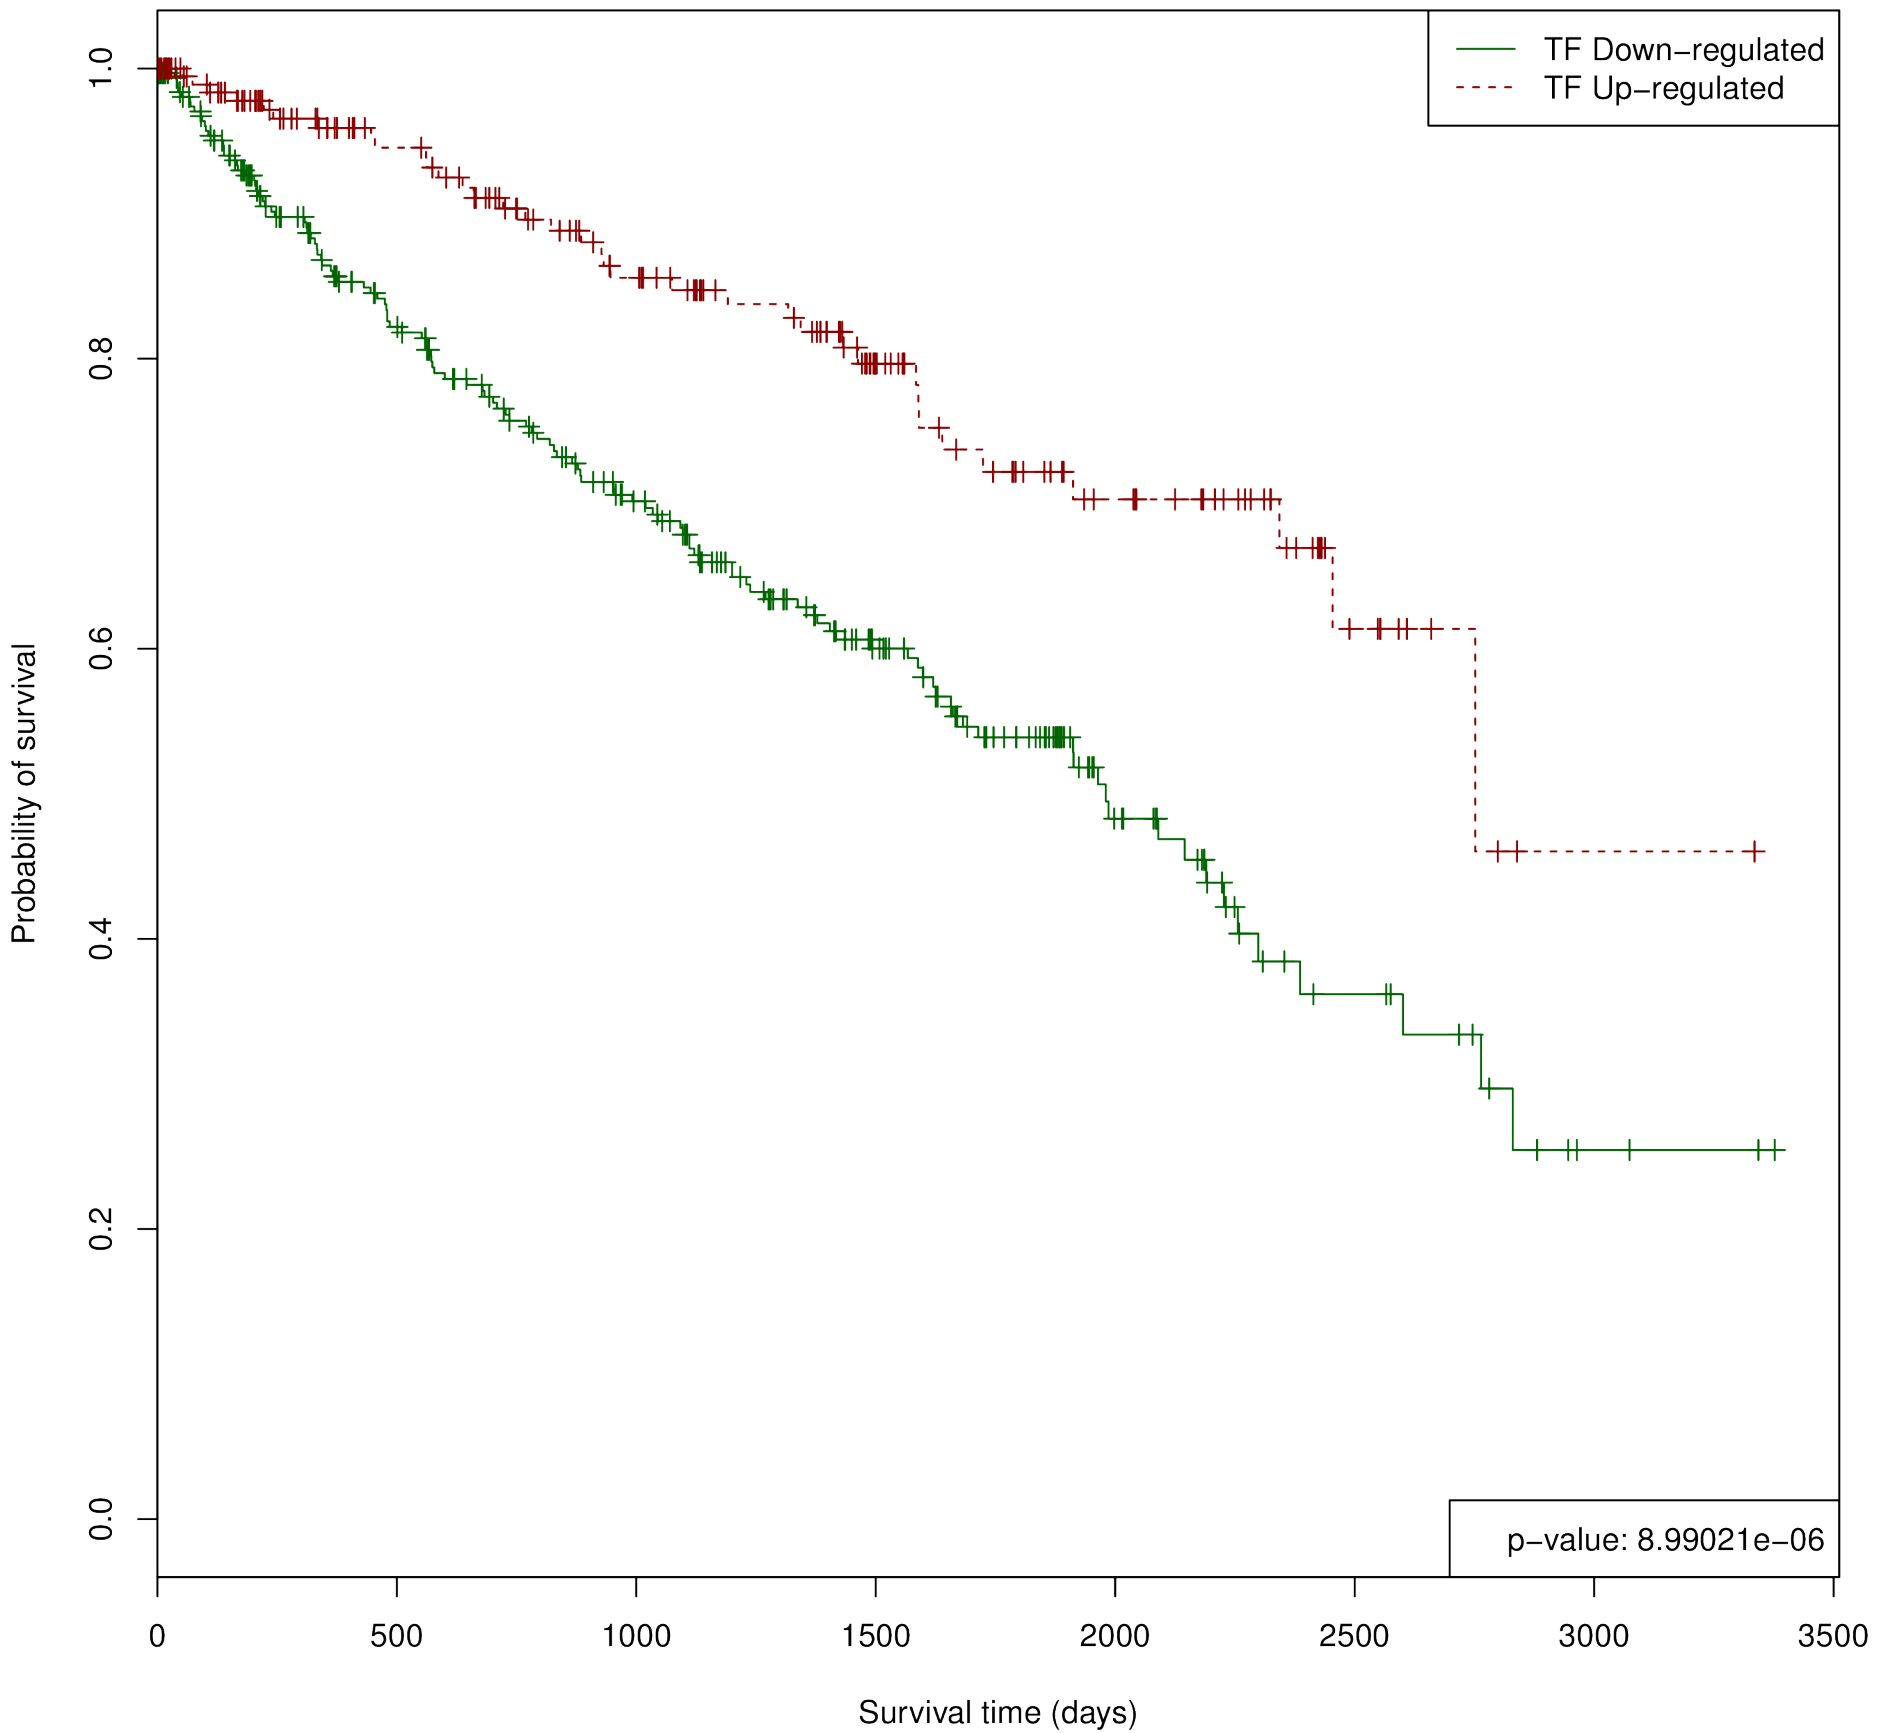

# YY1 in HNSC

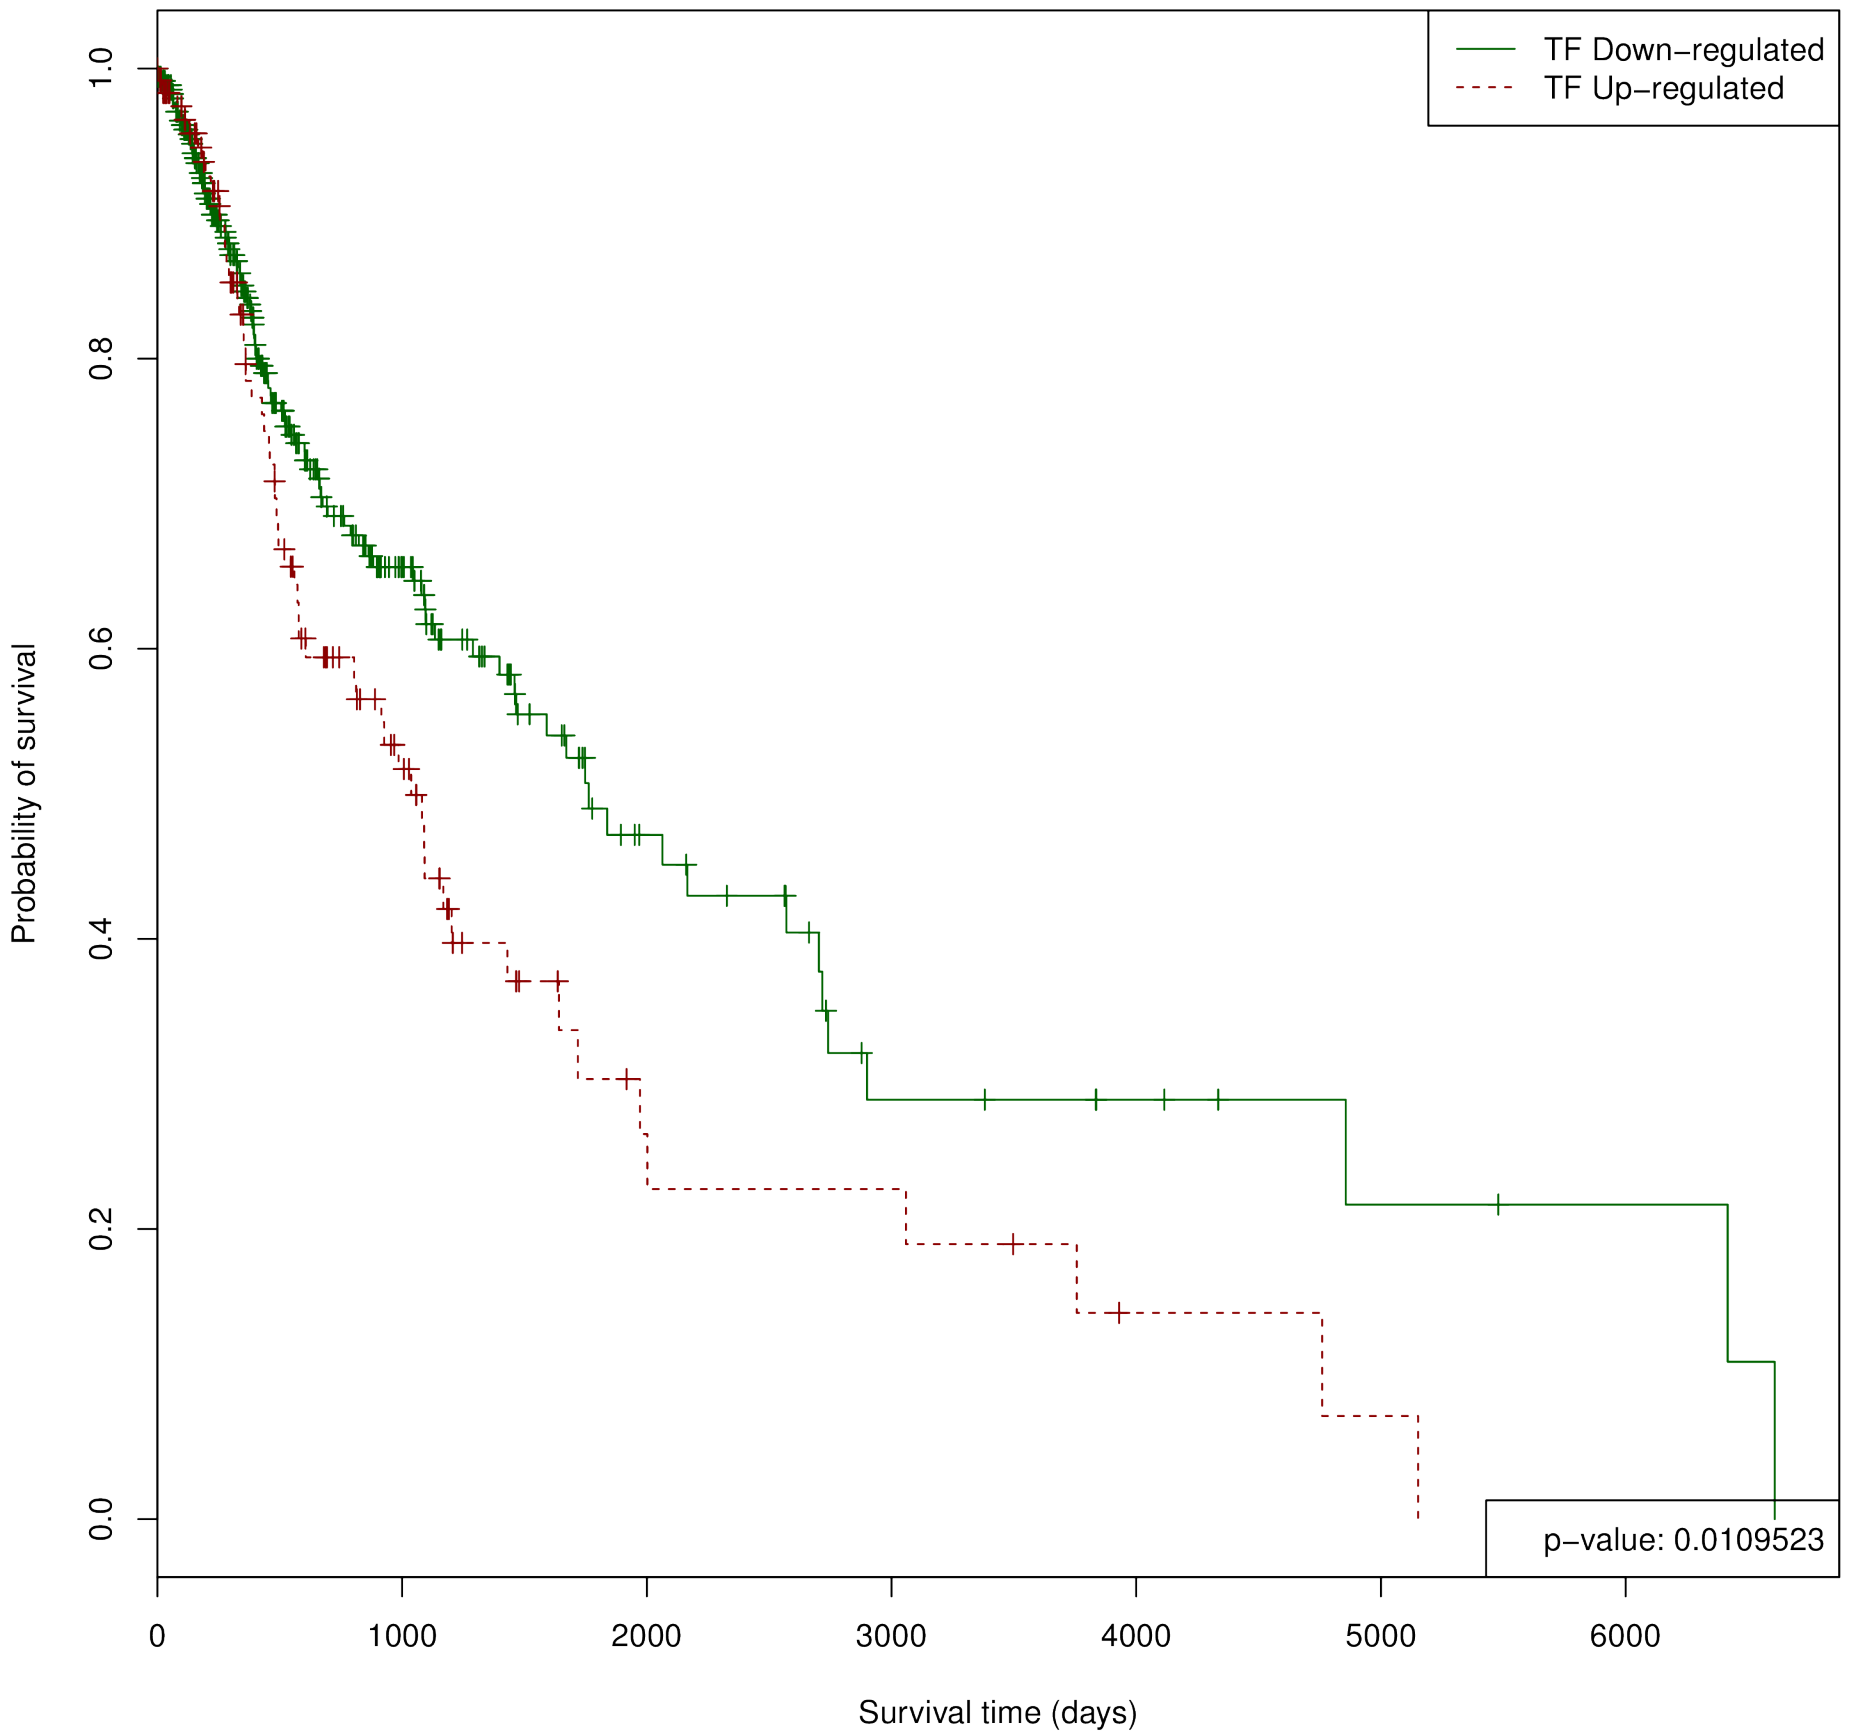



# YY1 in KIRC

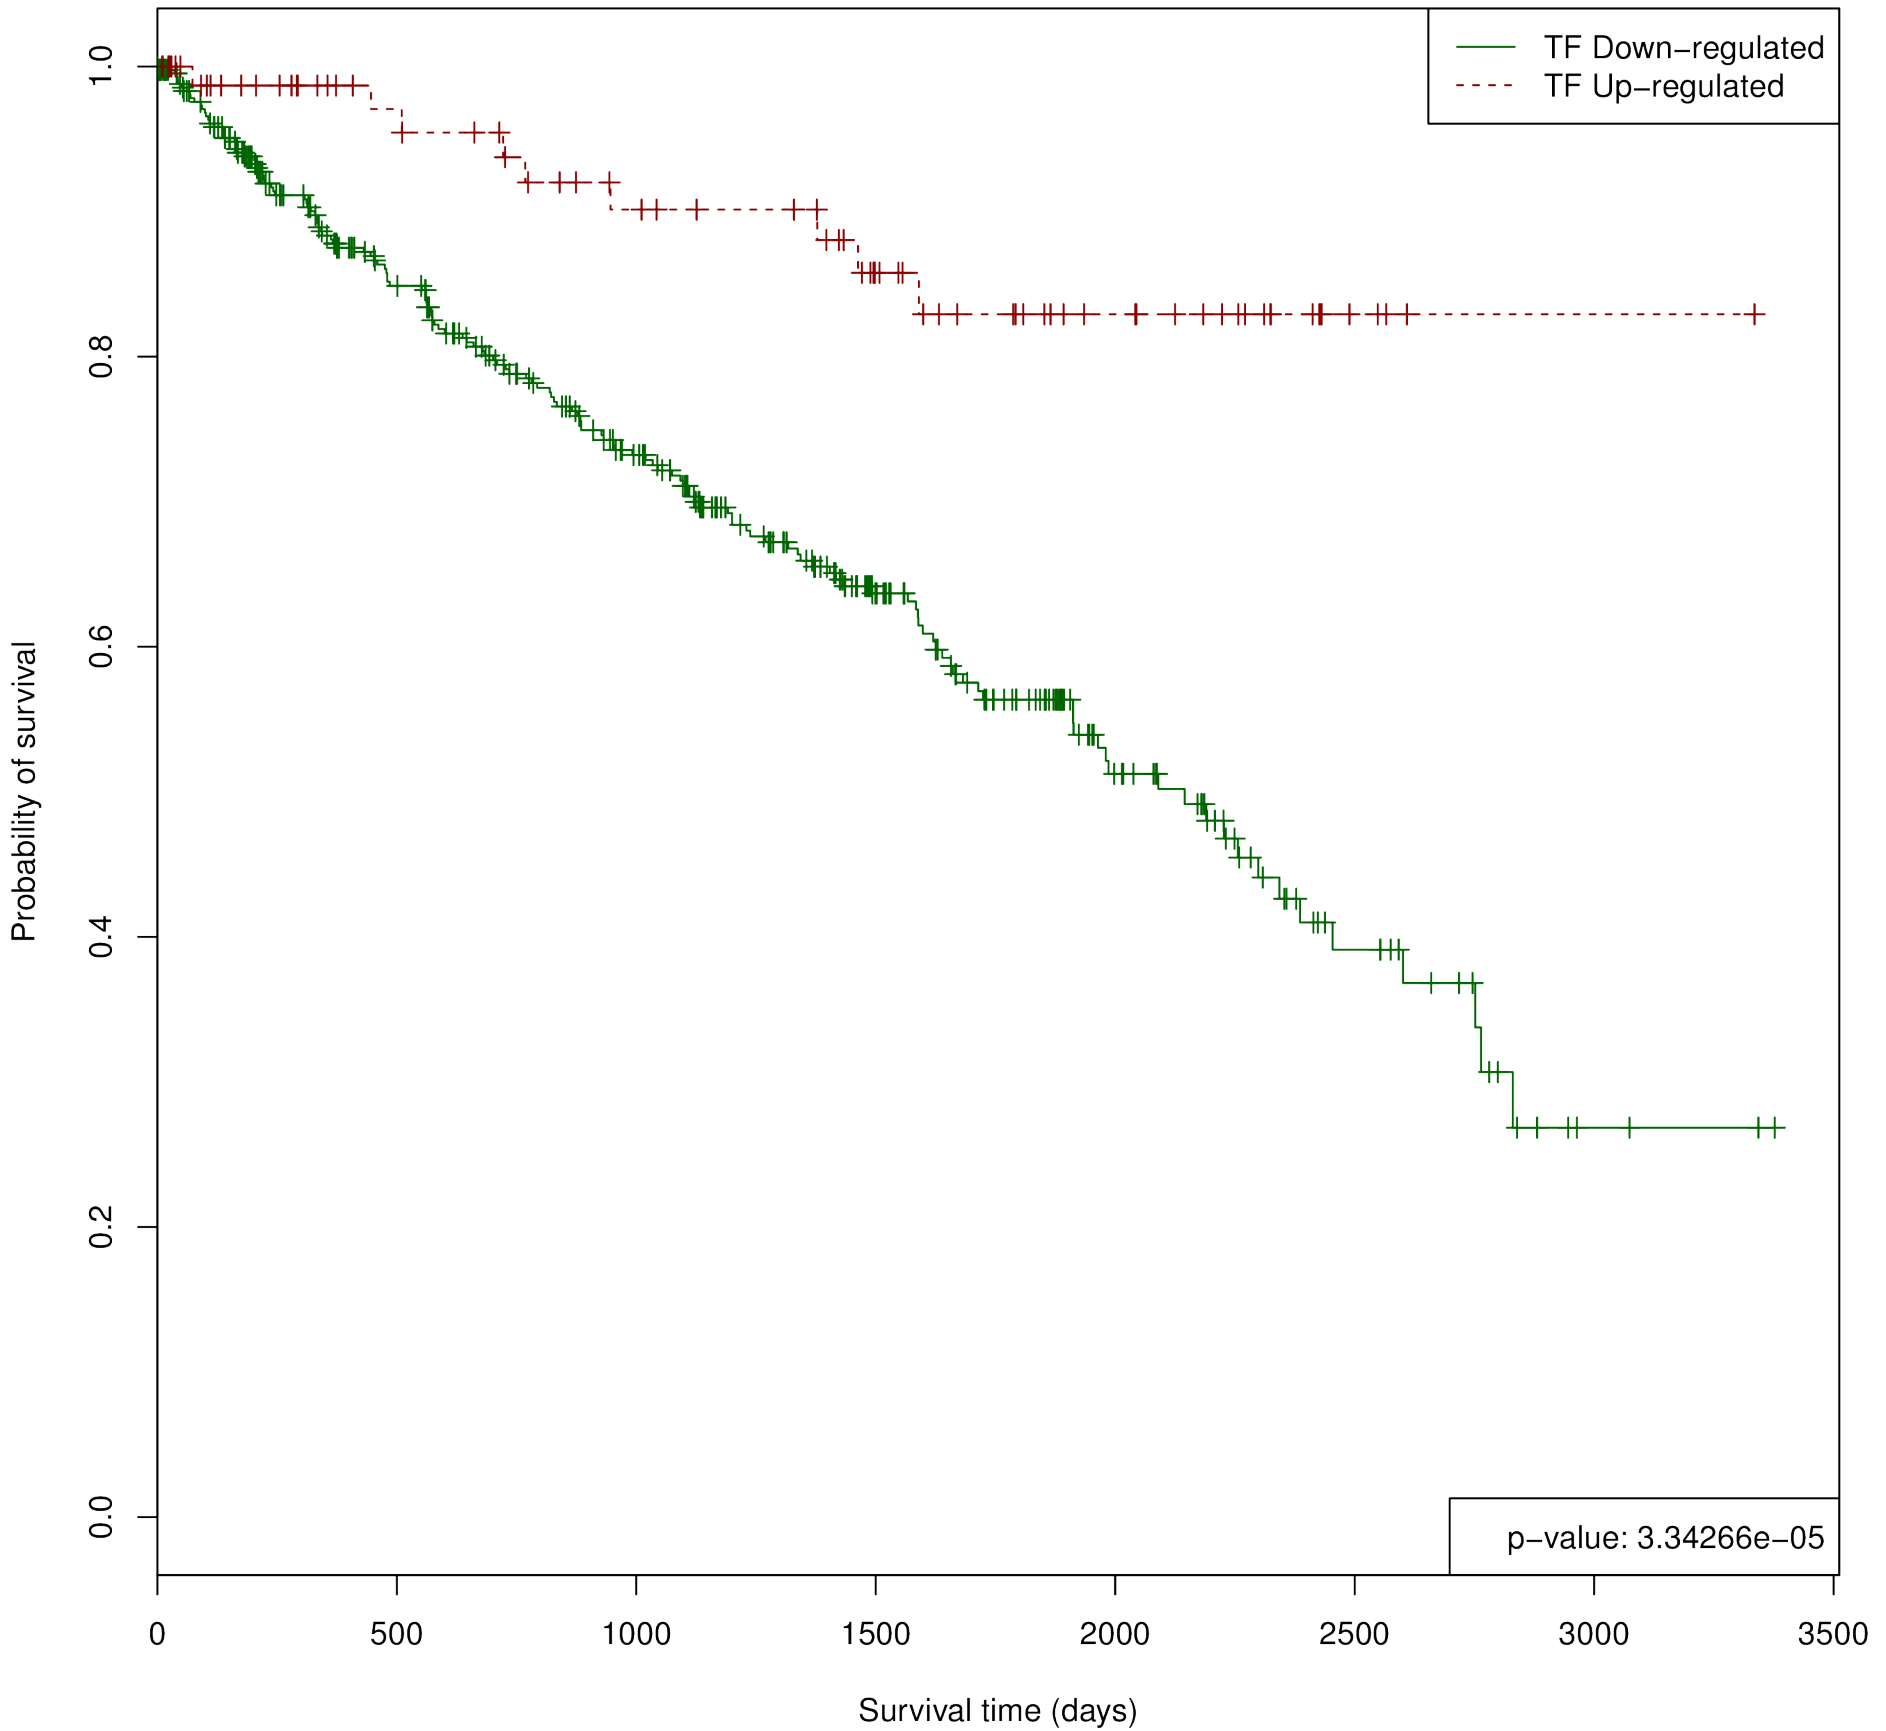

# ZBTB33 in BRCA

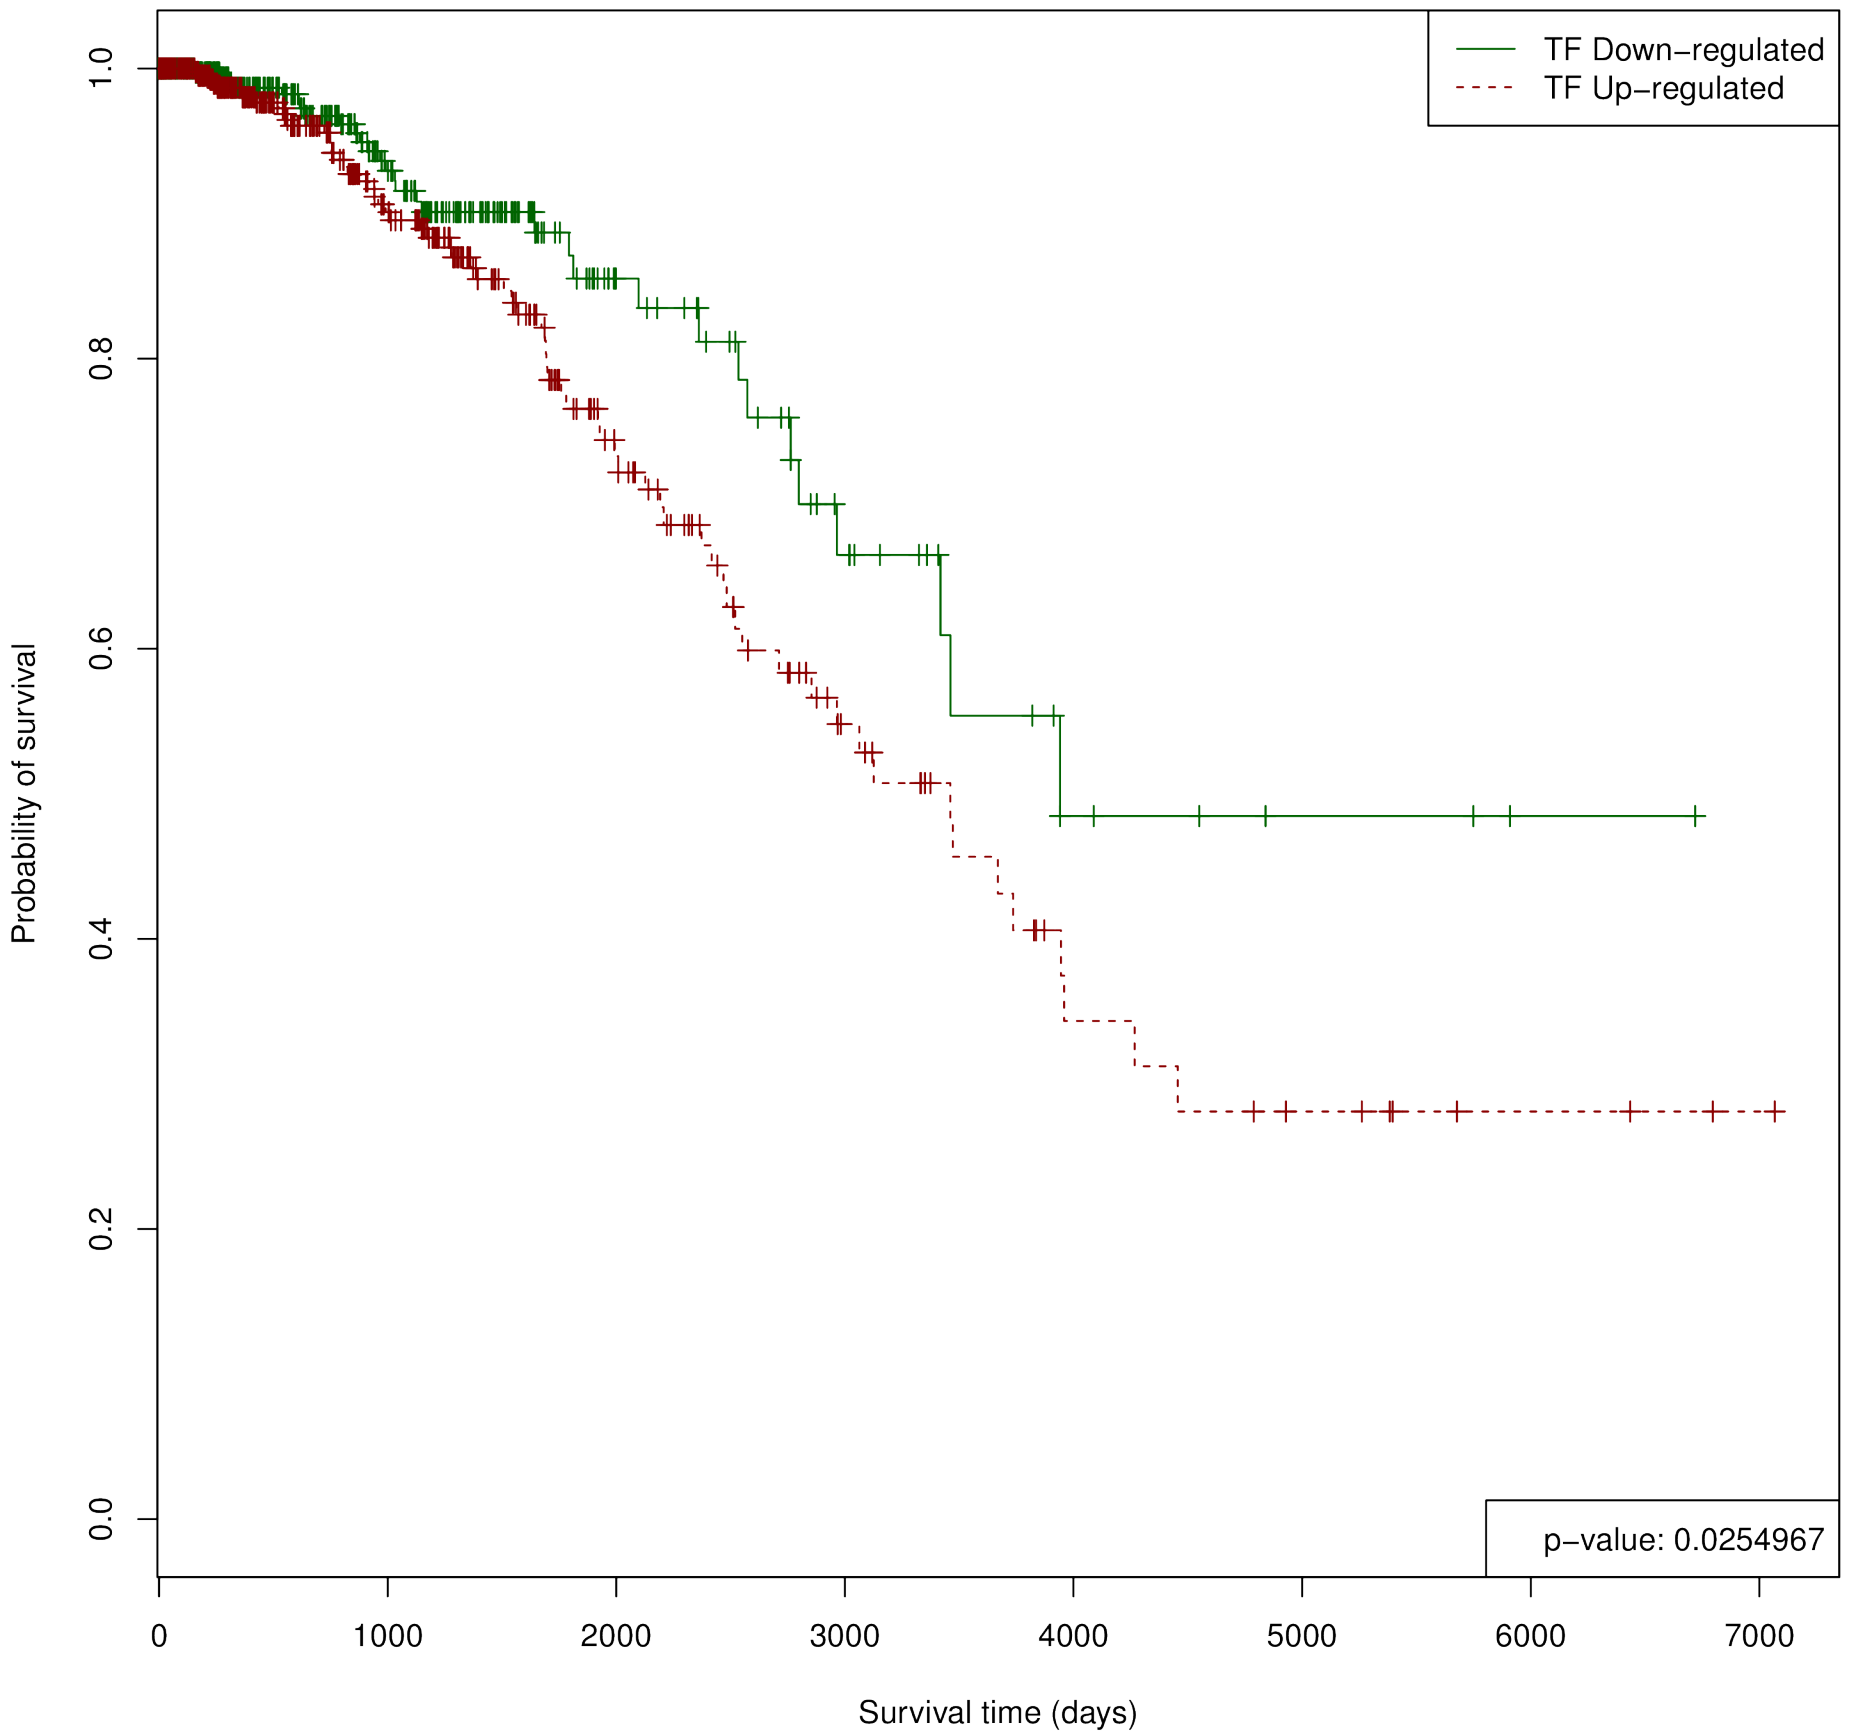

# ZBTB33 in KIRC

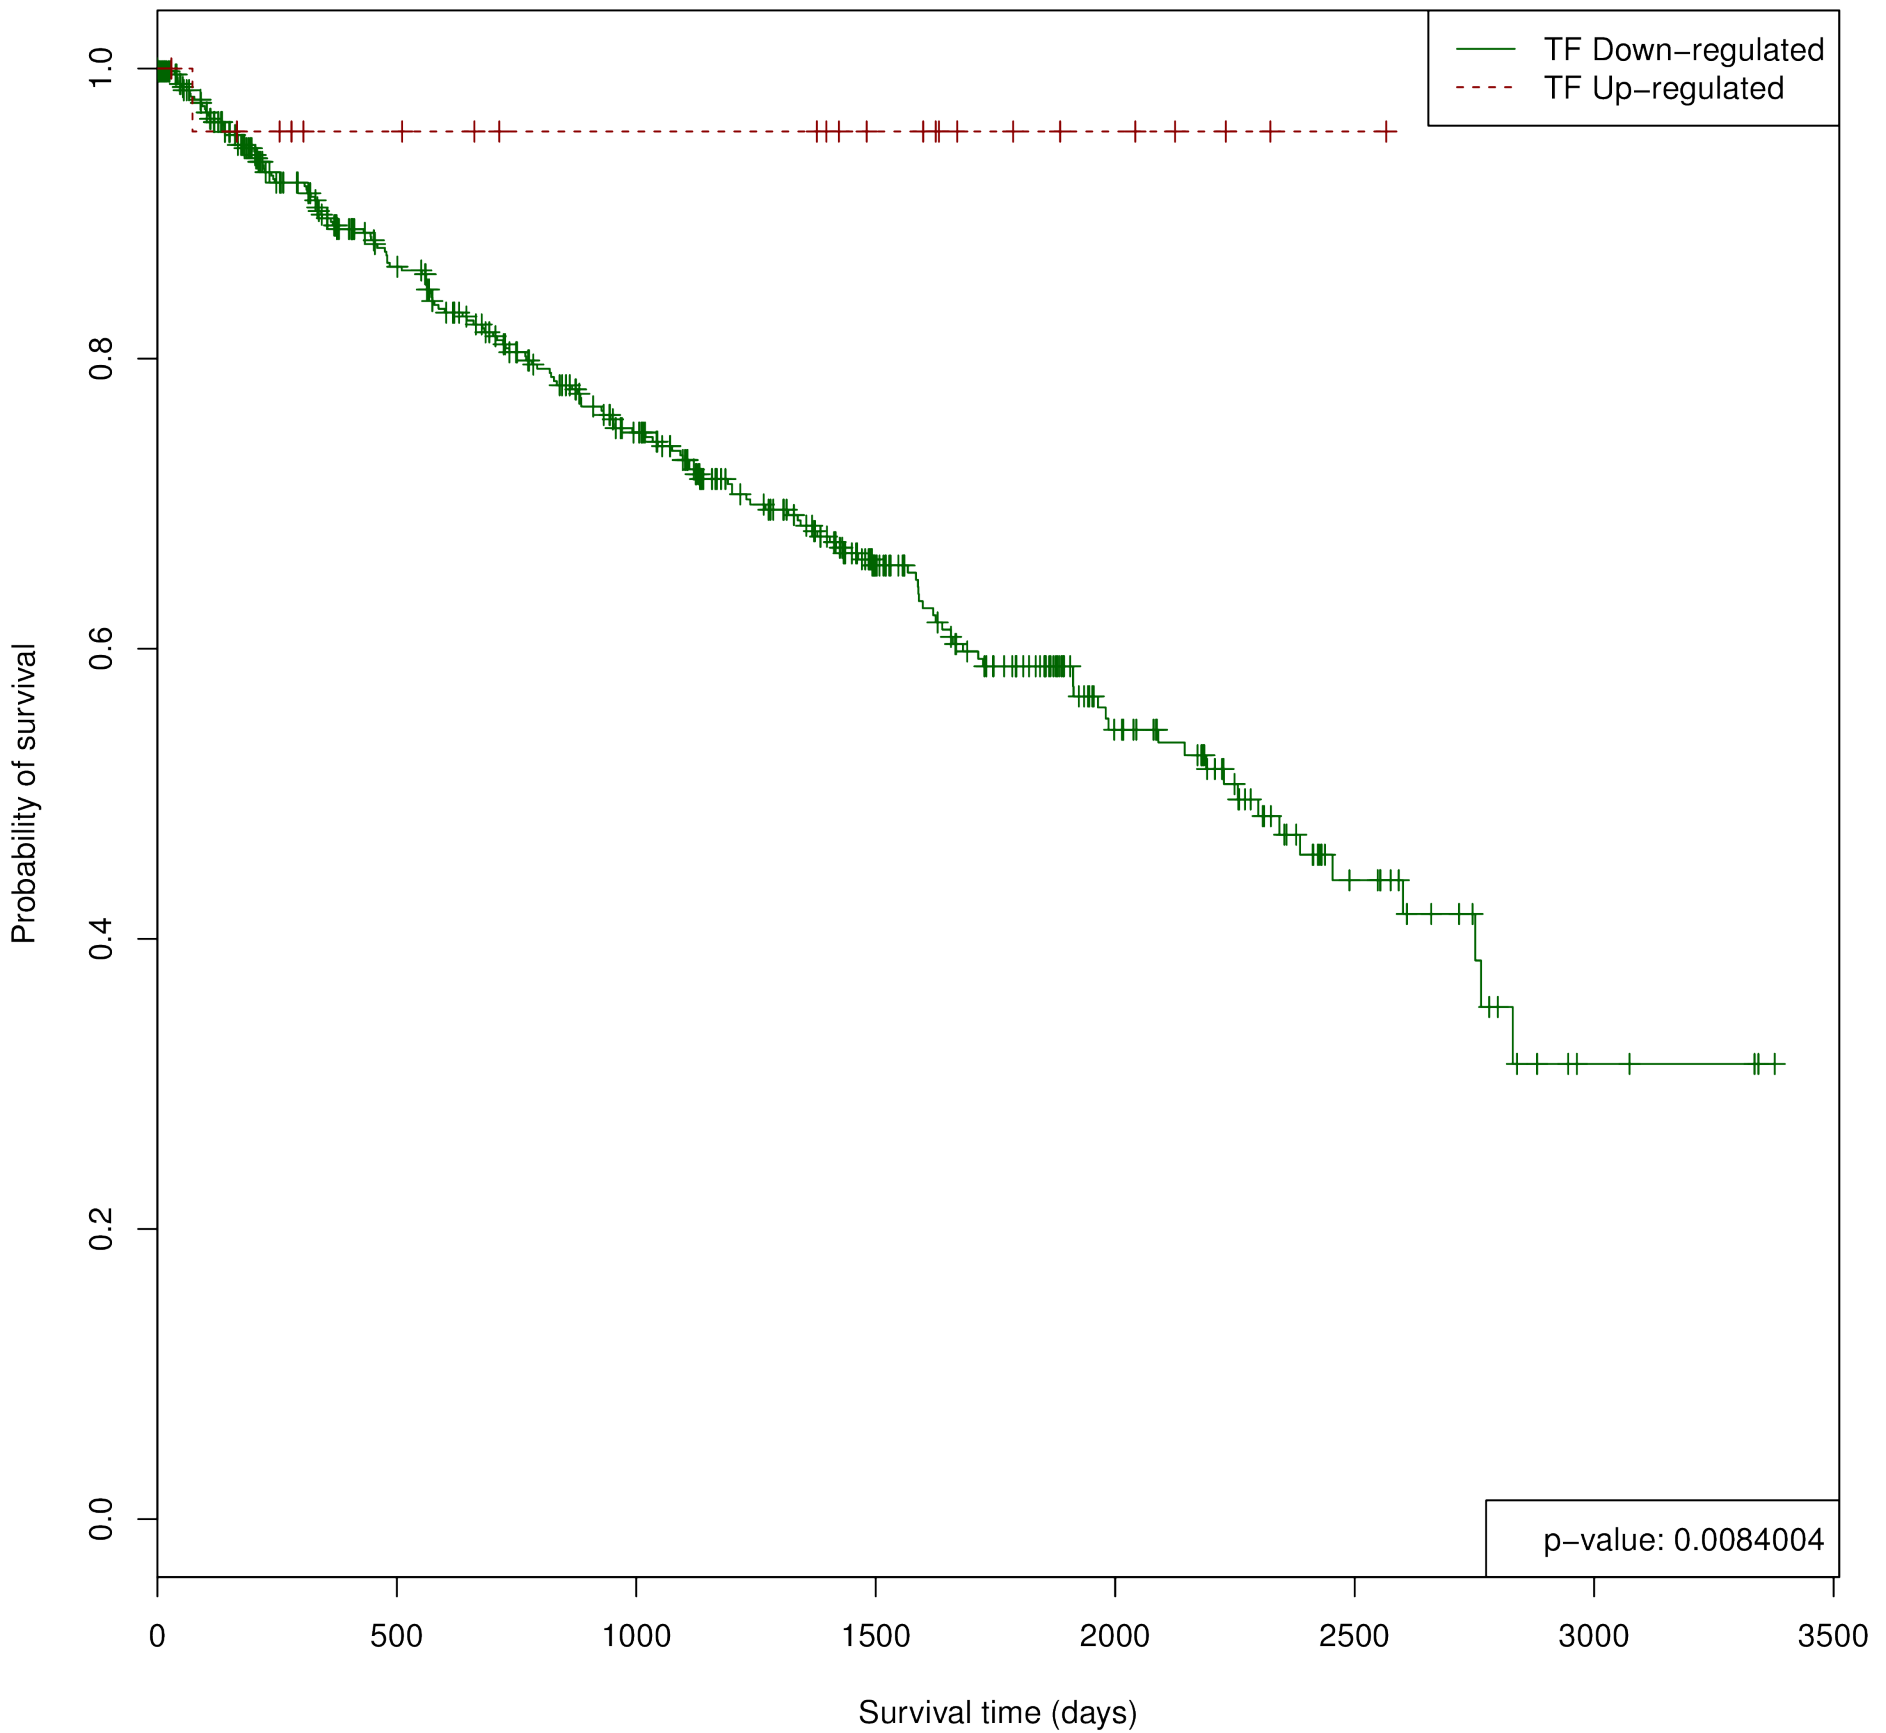

# ZEB1 in KIRC

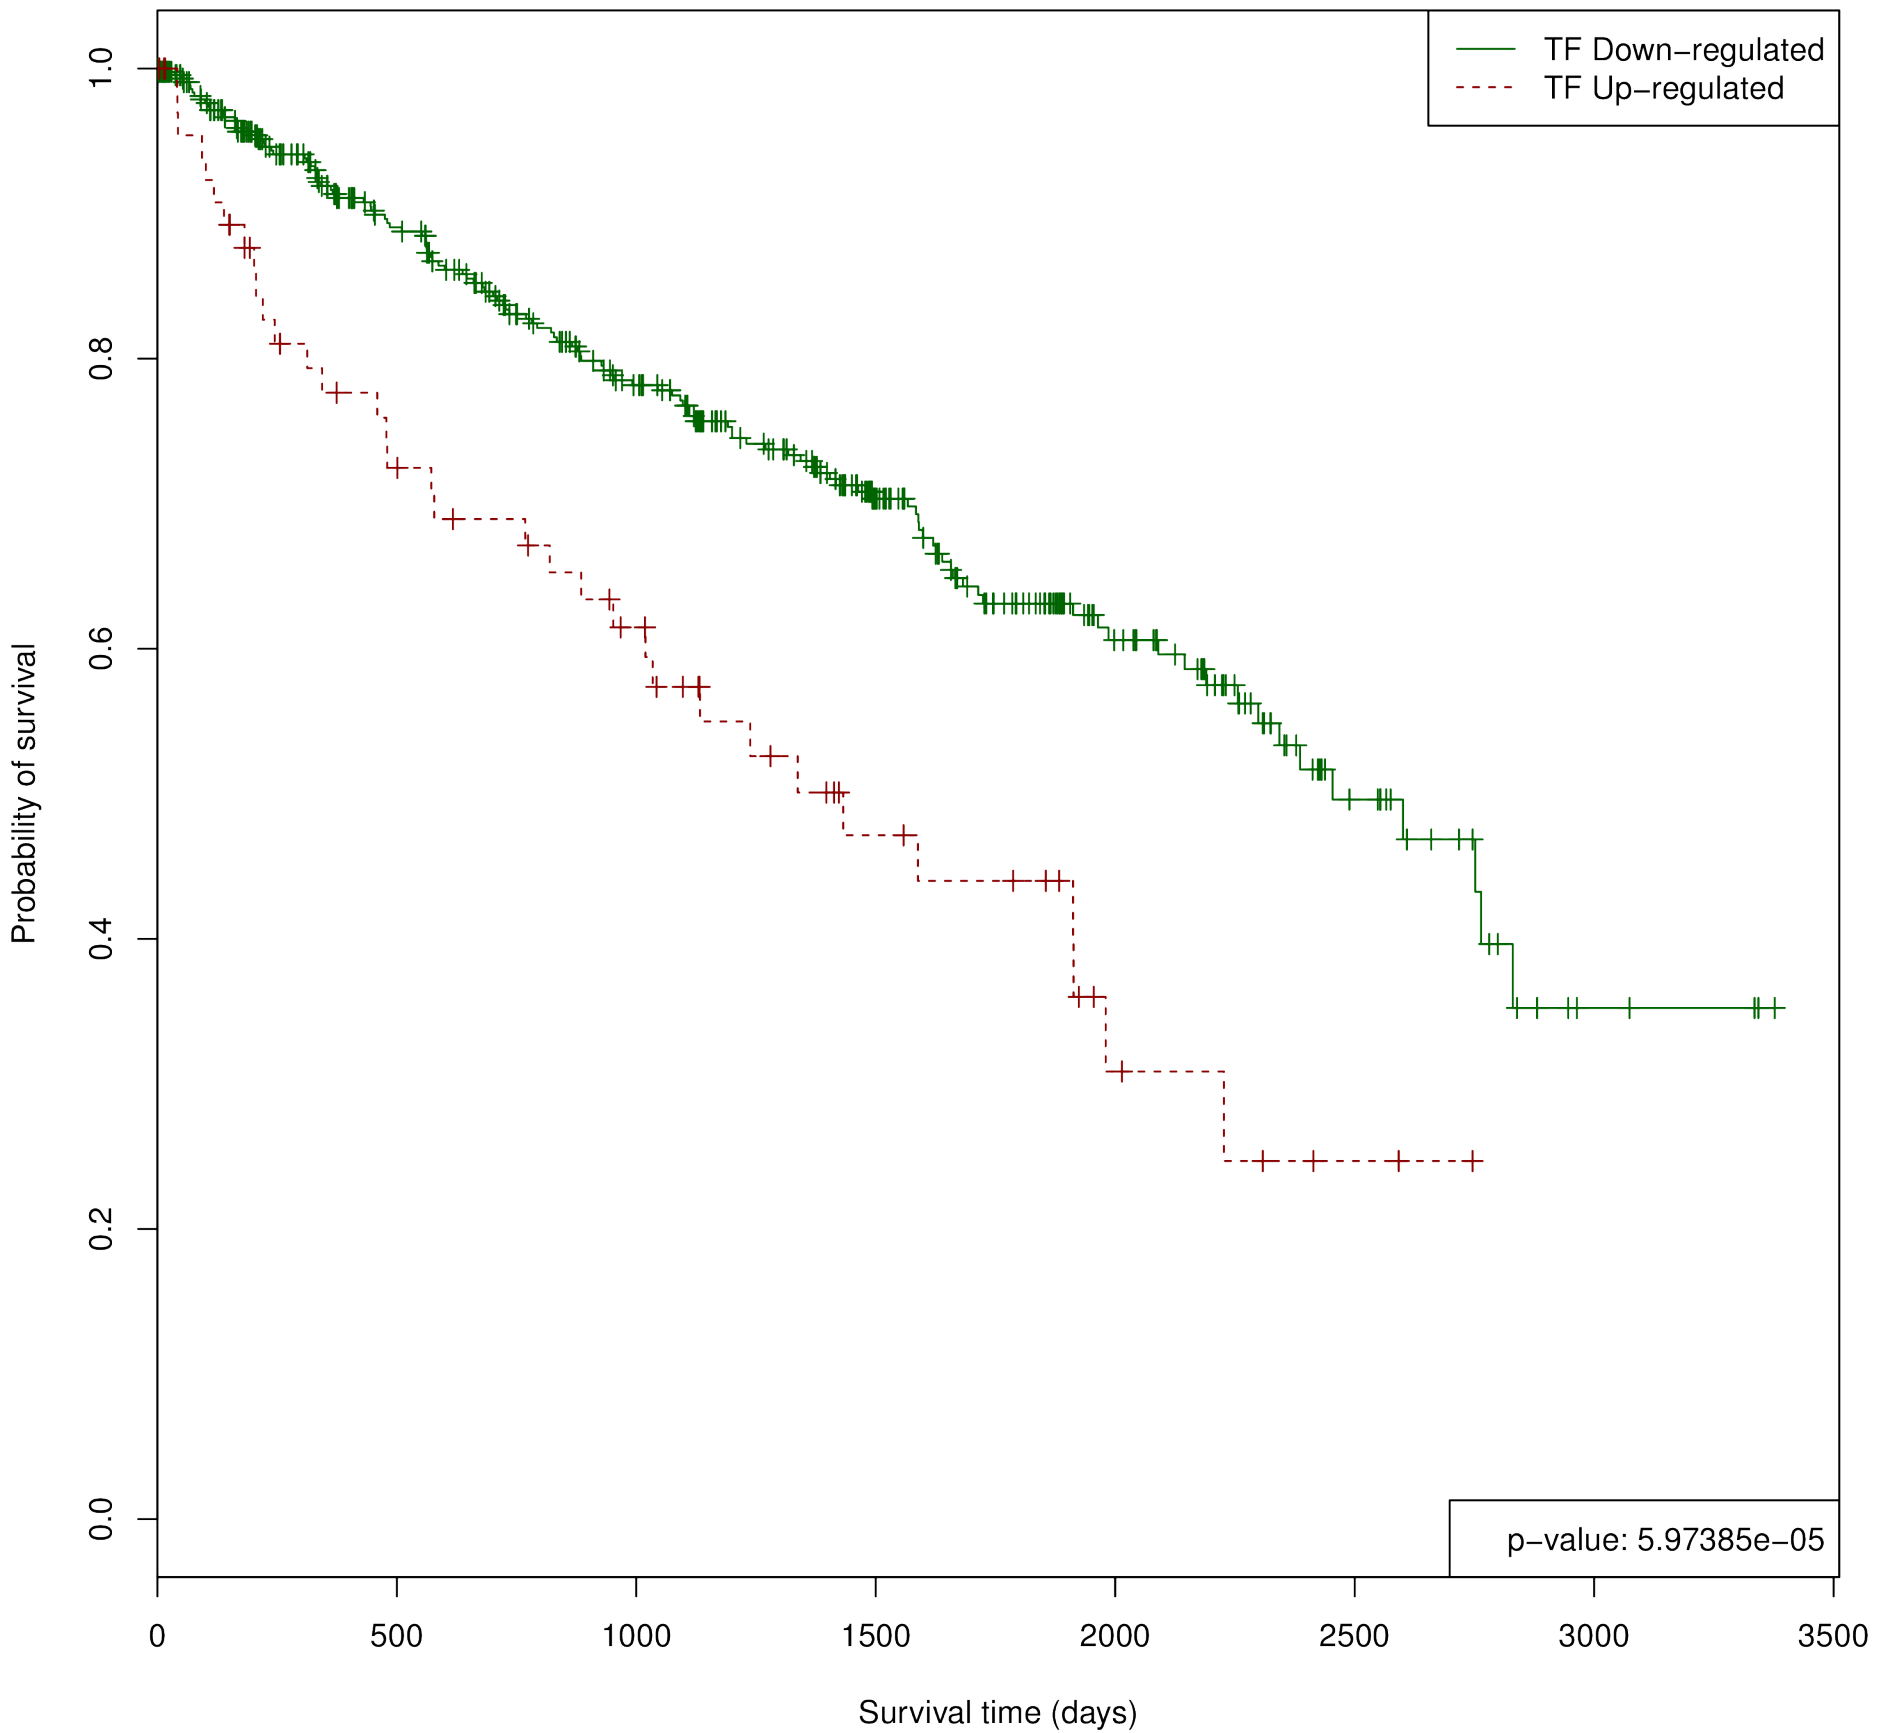

# ZNF263 in KIRC

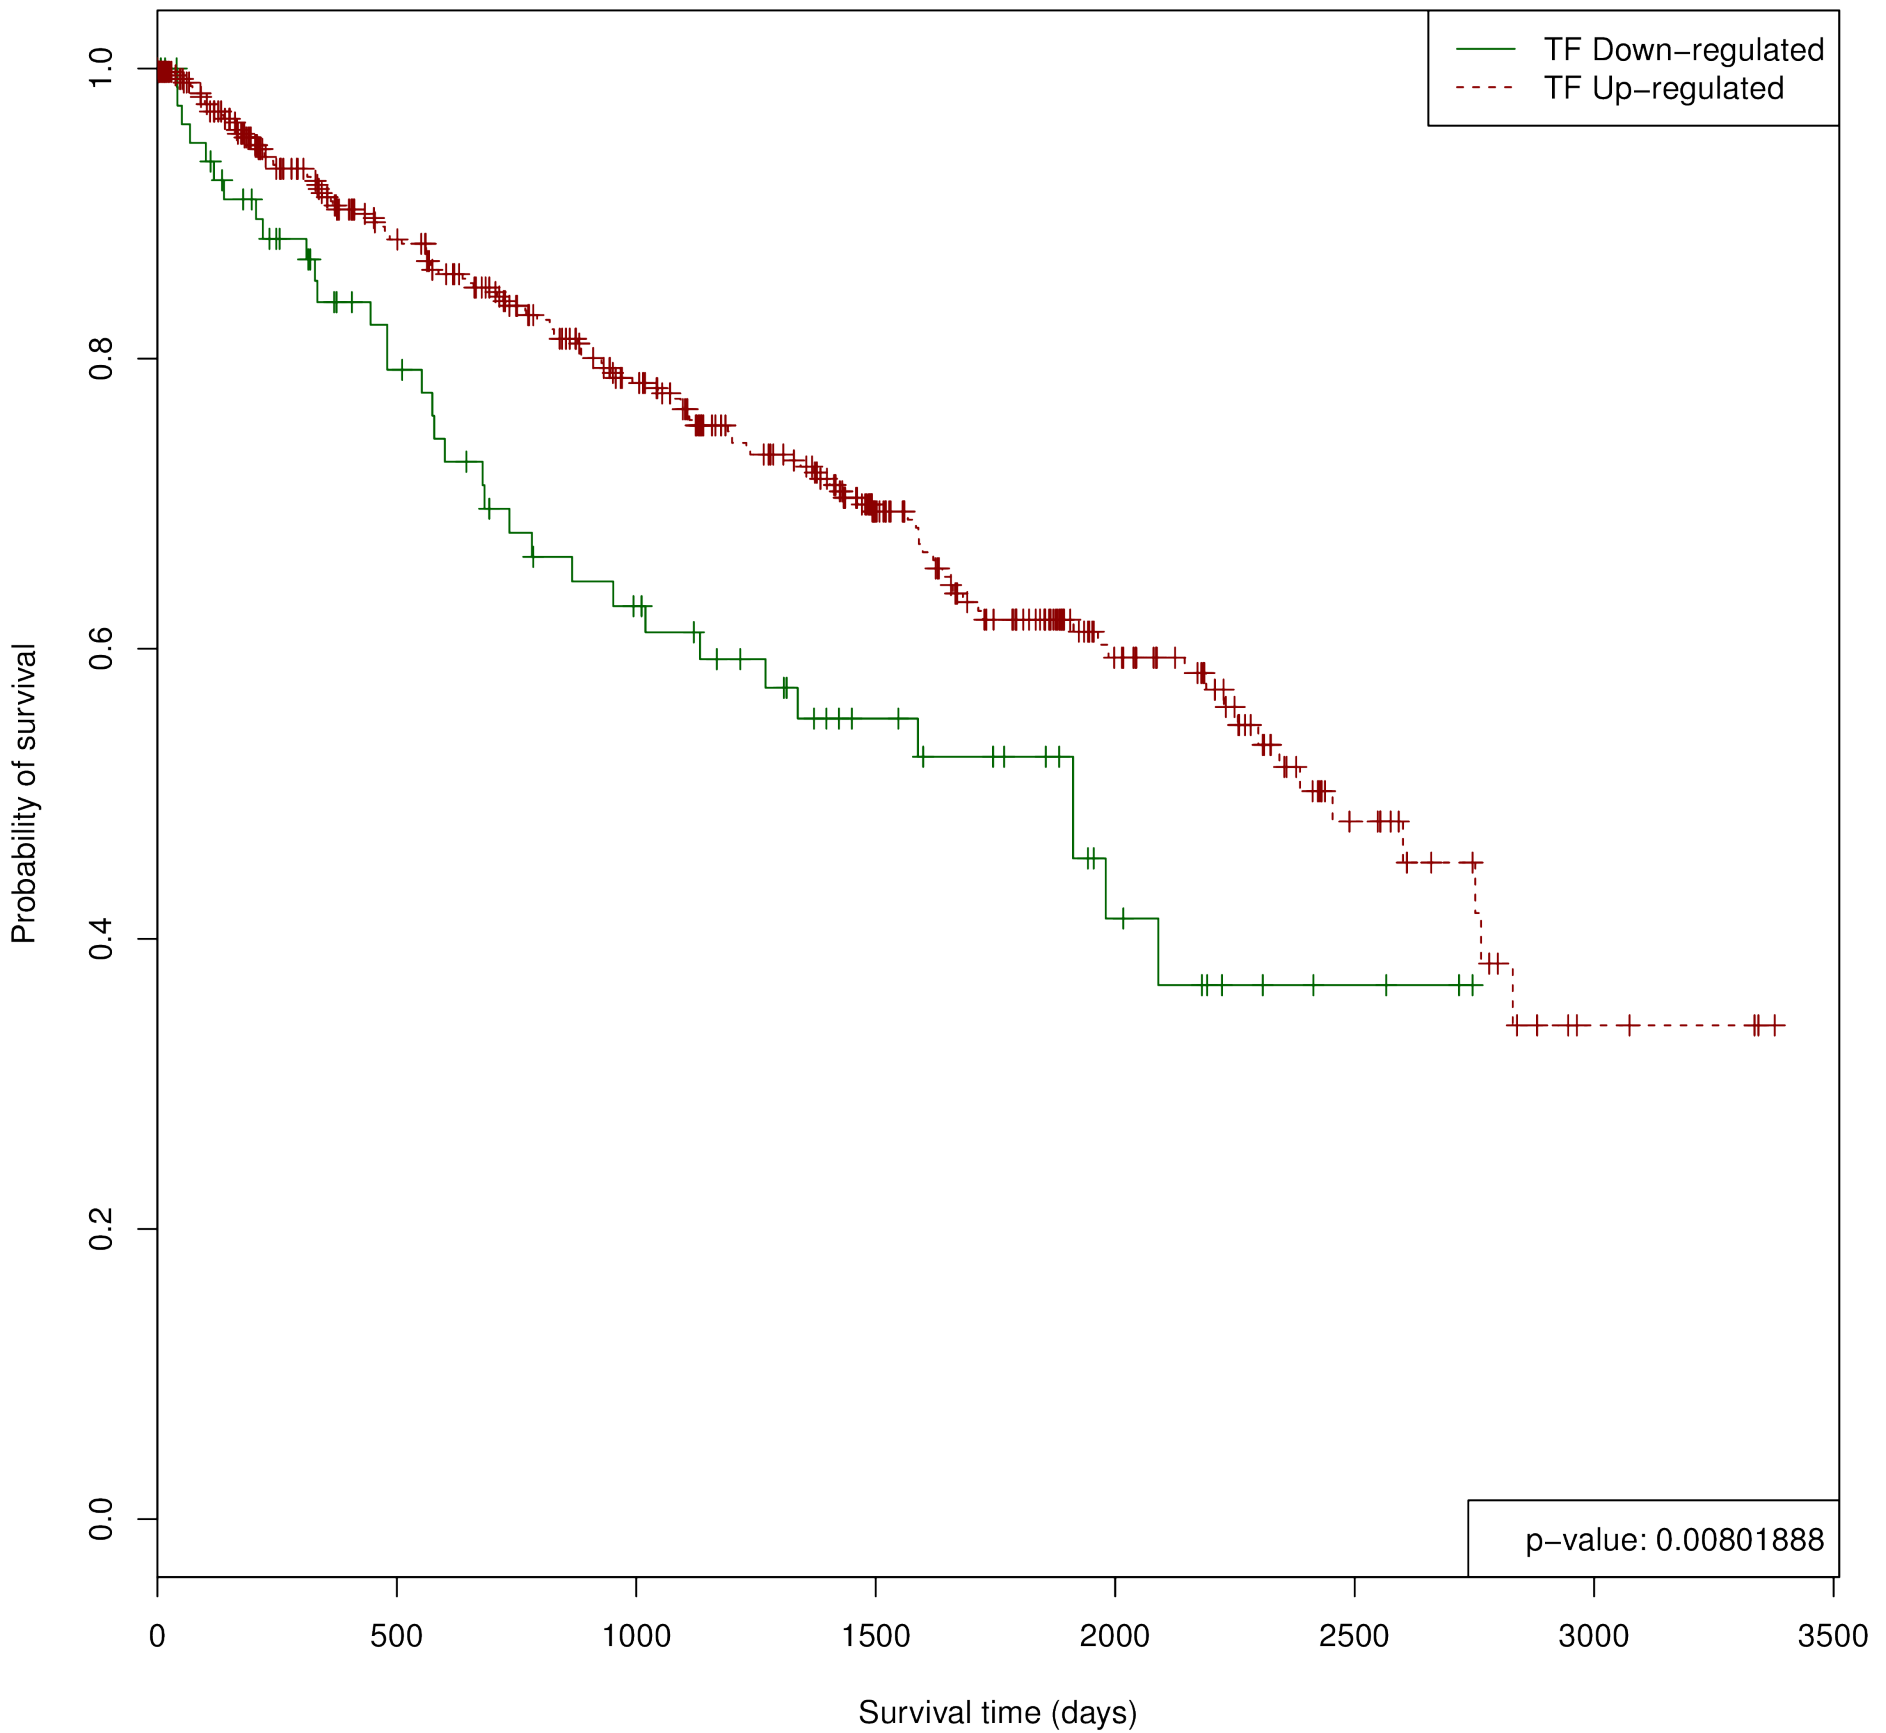

**Supplementary Figure 3.** Number of TF with a significant change of activity between cancers and the corresponding healthy tissue of origin a function of mean tumour purity.

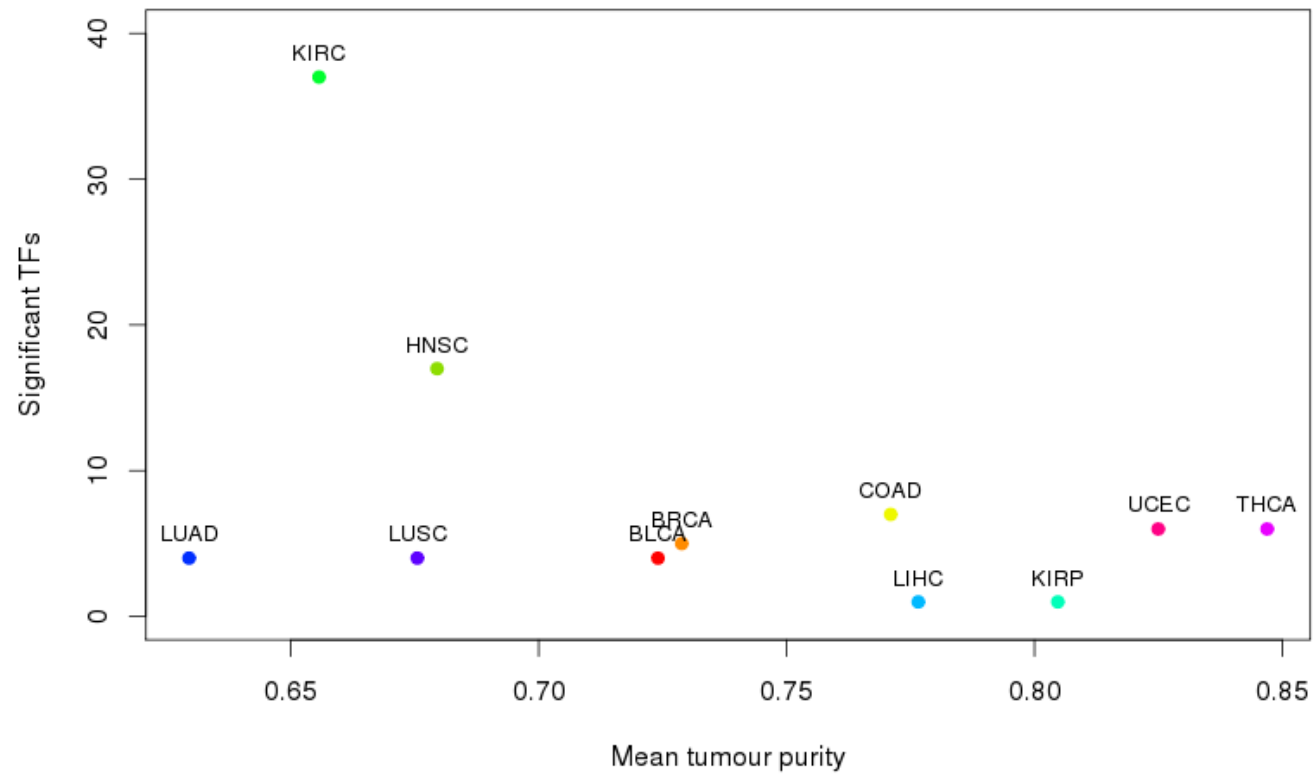

**Supplementary Figure 4.** Number of TF significantly associated to survival by a K-M test as a function of the number of deceased patients.

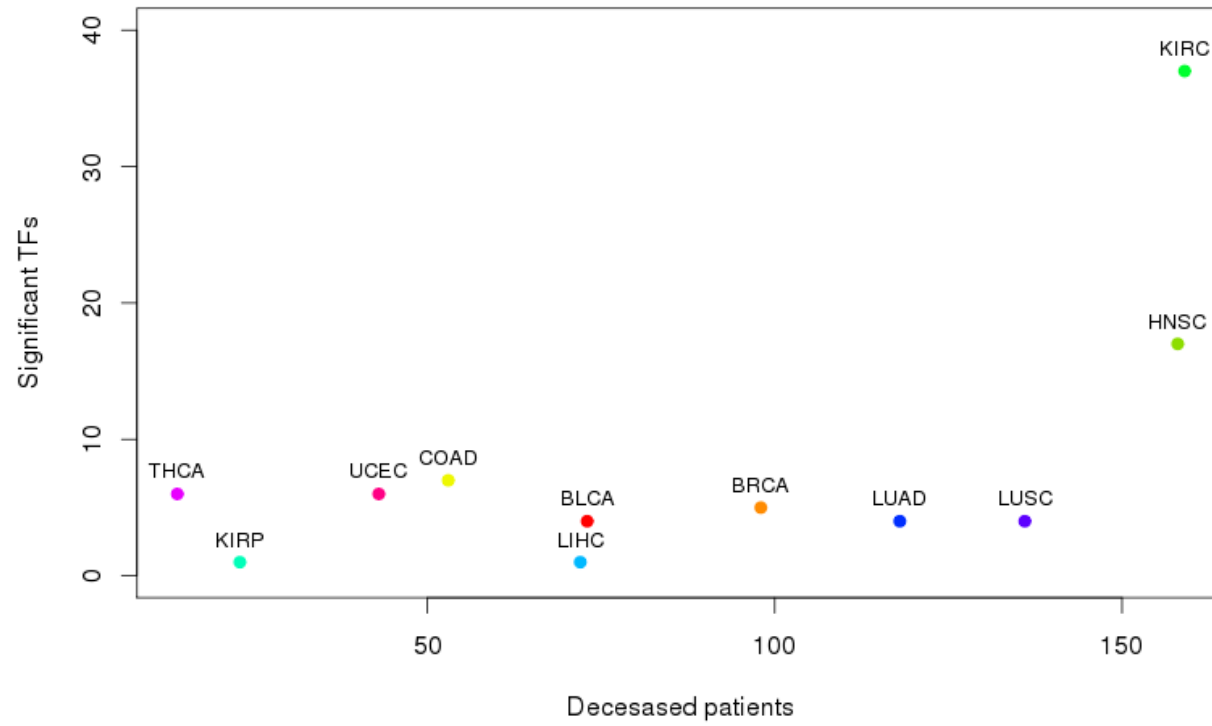

Supplement: srep39709-s4.pdf [file srep39709-s4.pdf]
